# Supplementary material
Source: PubMed Central journal article supplement (PMC4069404)
Supplement: ismej20146x1.pdf [file ismej20146x1.pdf]

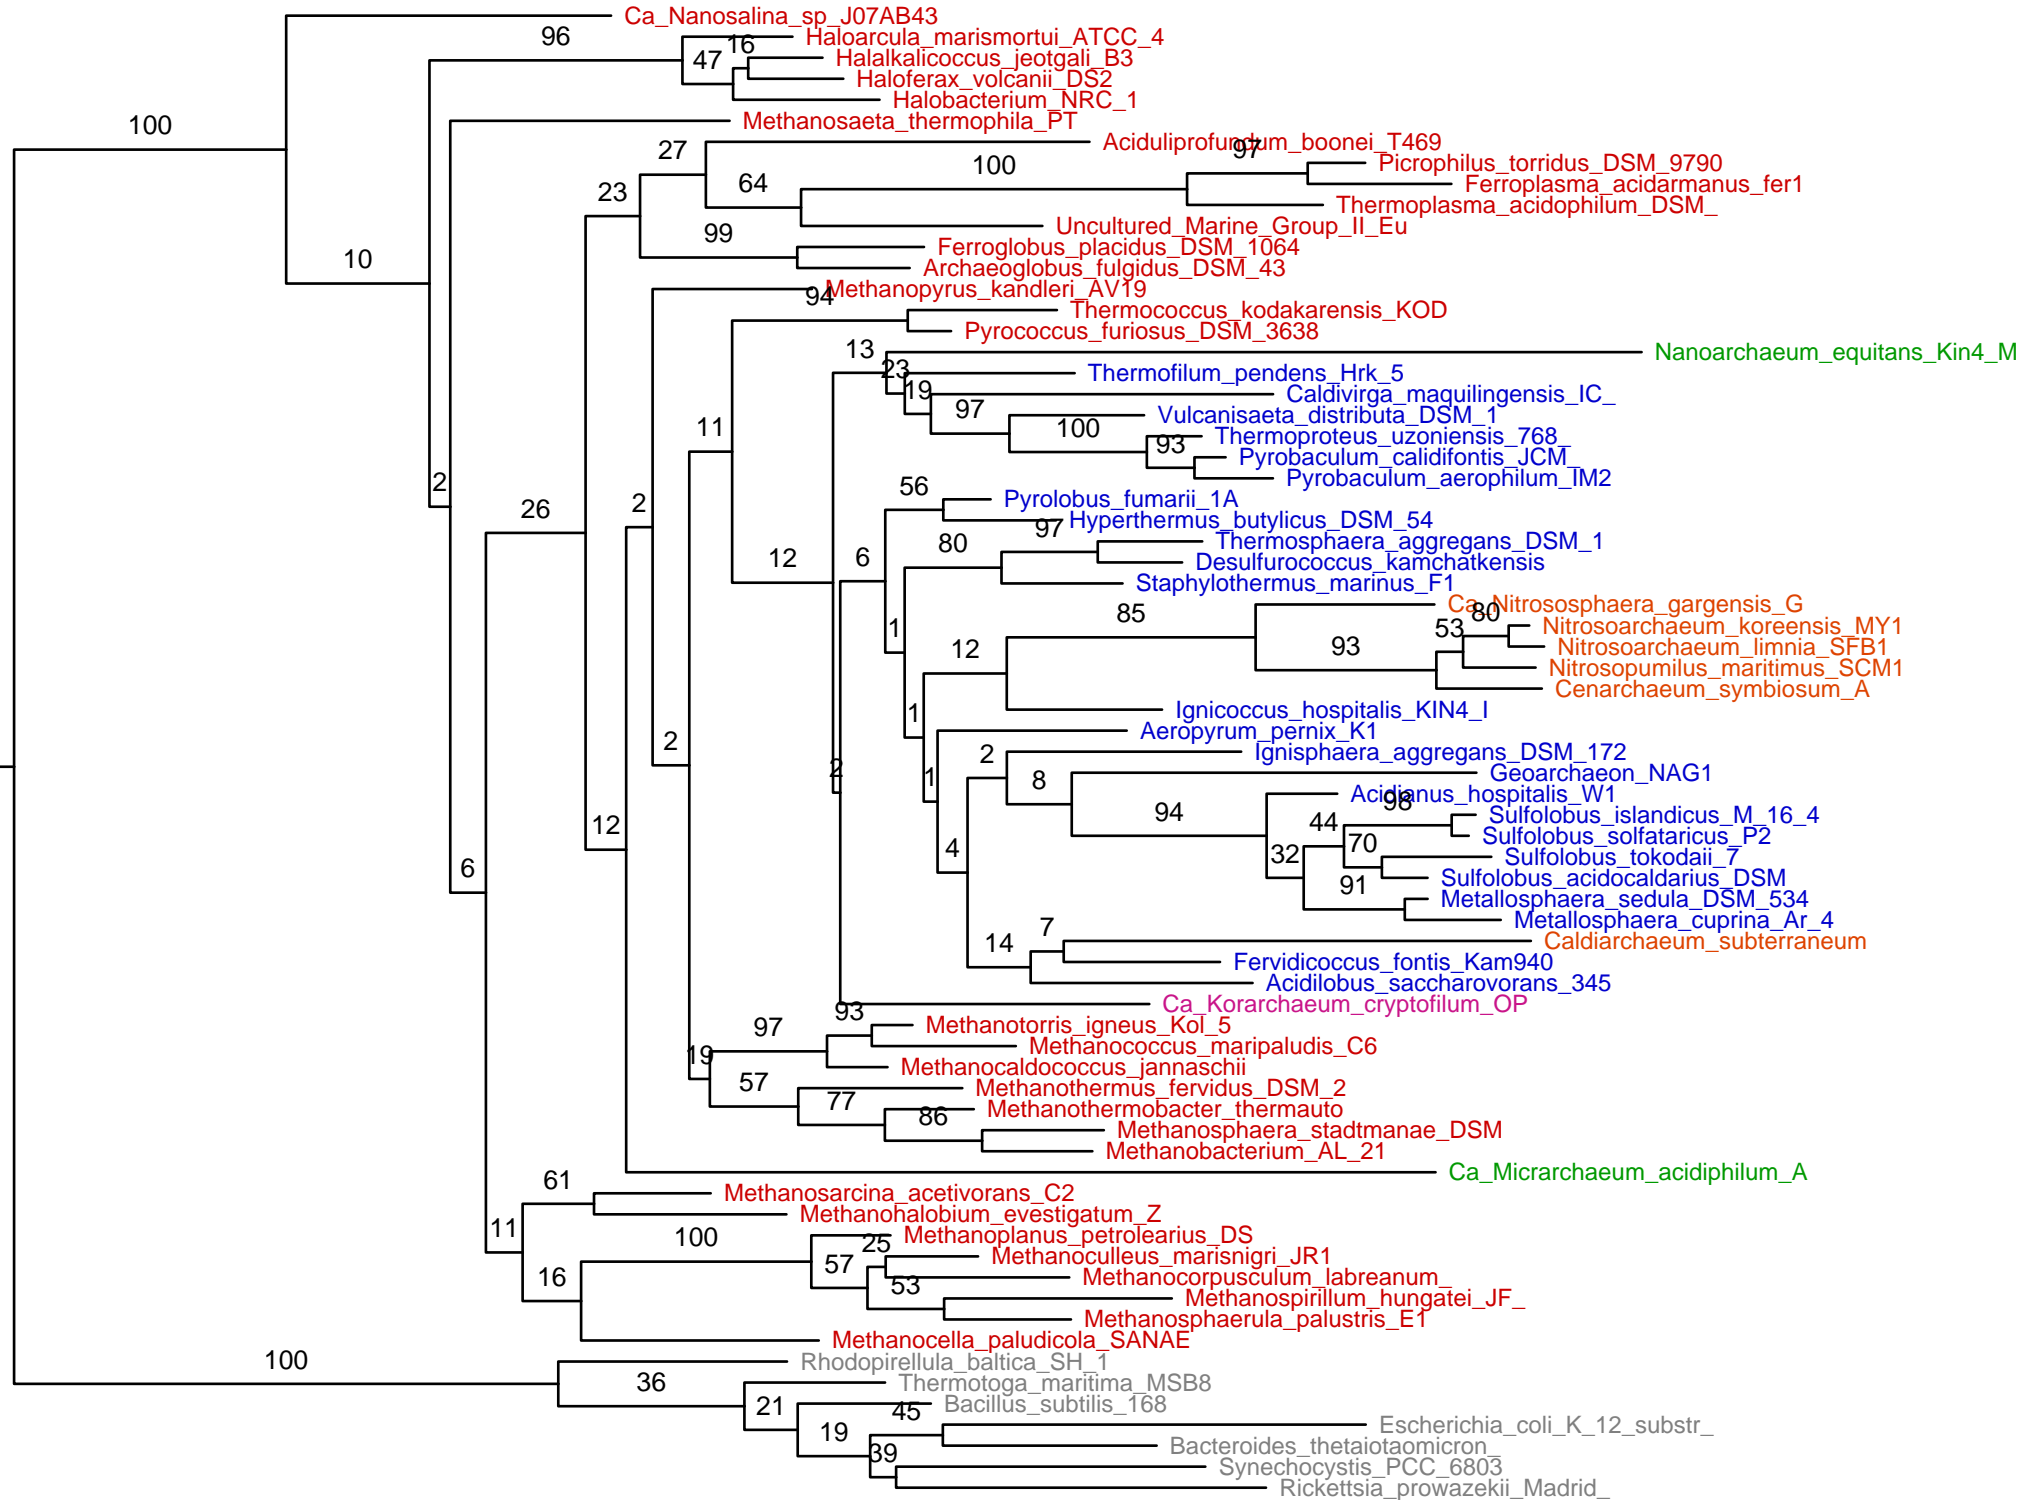

0.4

ML phylogeny of Ribosomal protein L15 (arCOG00779)

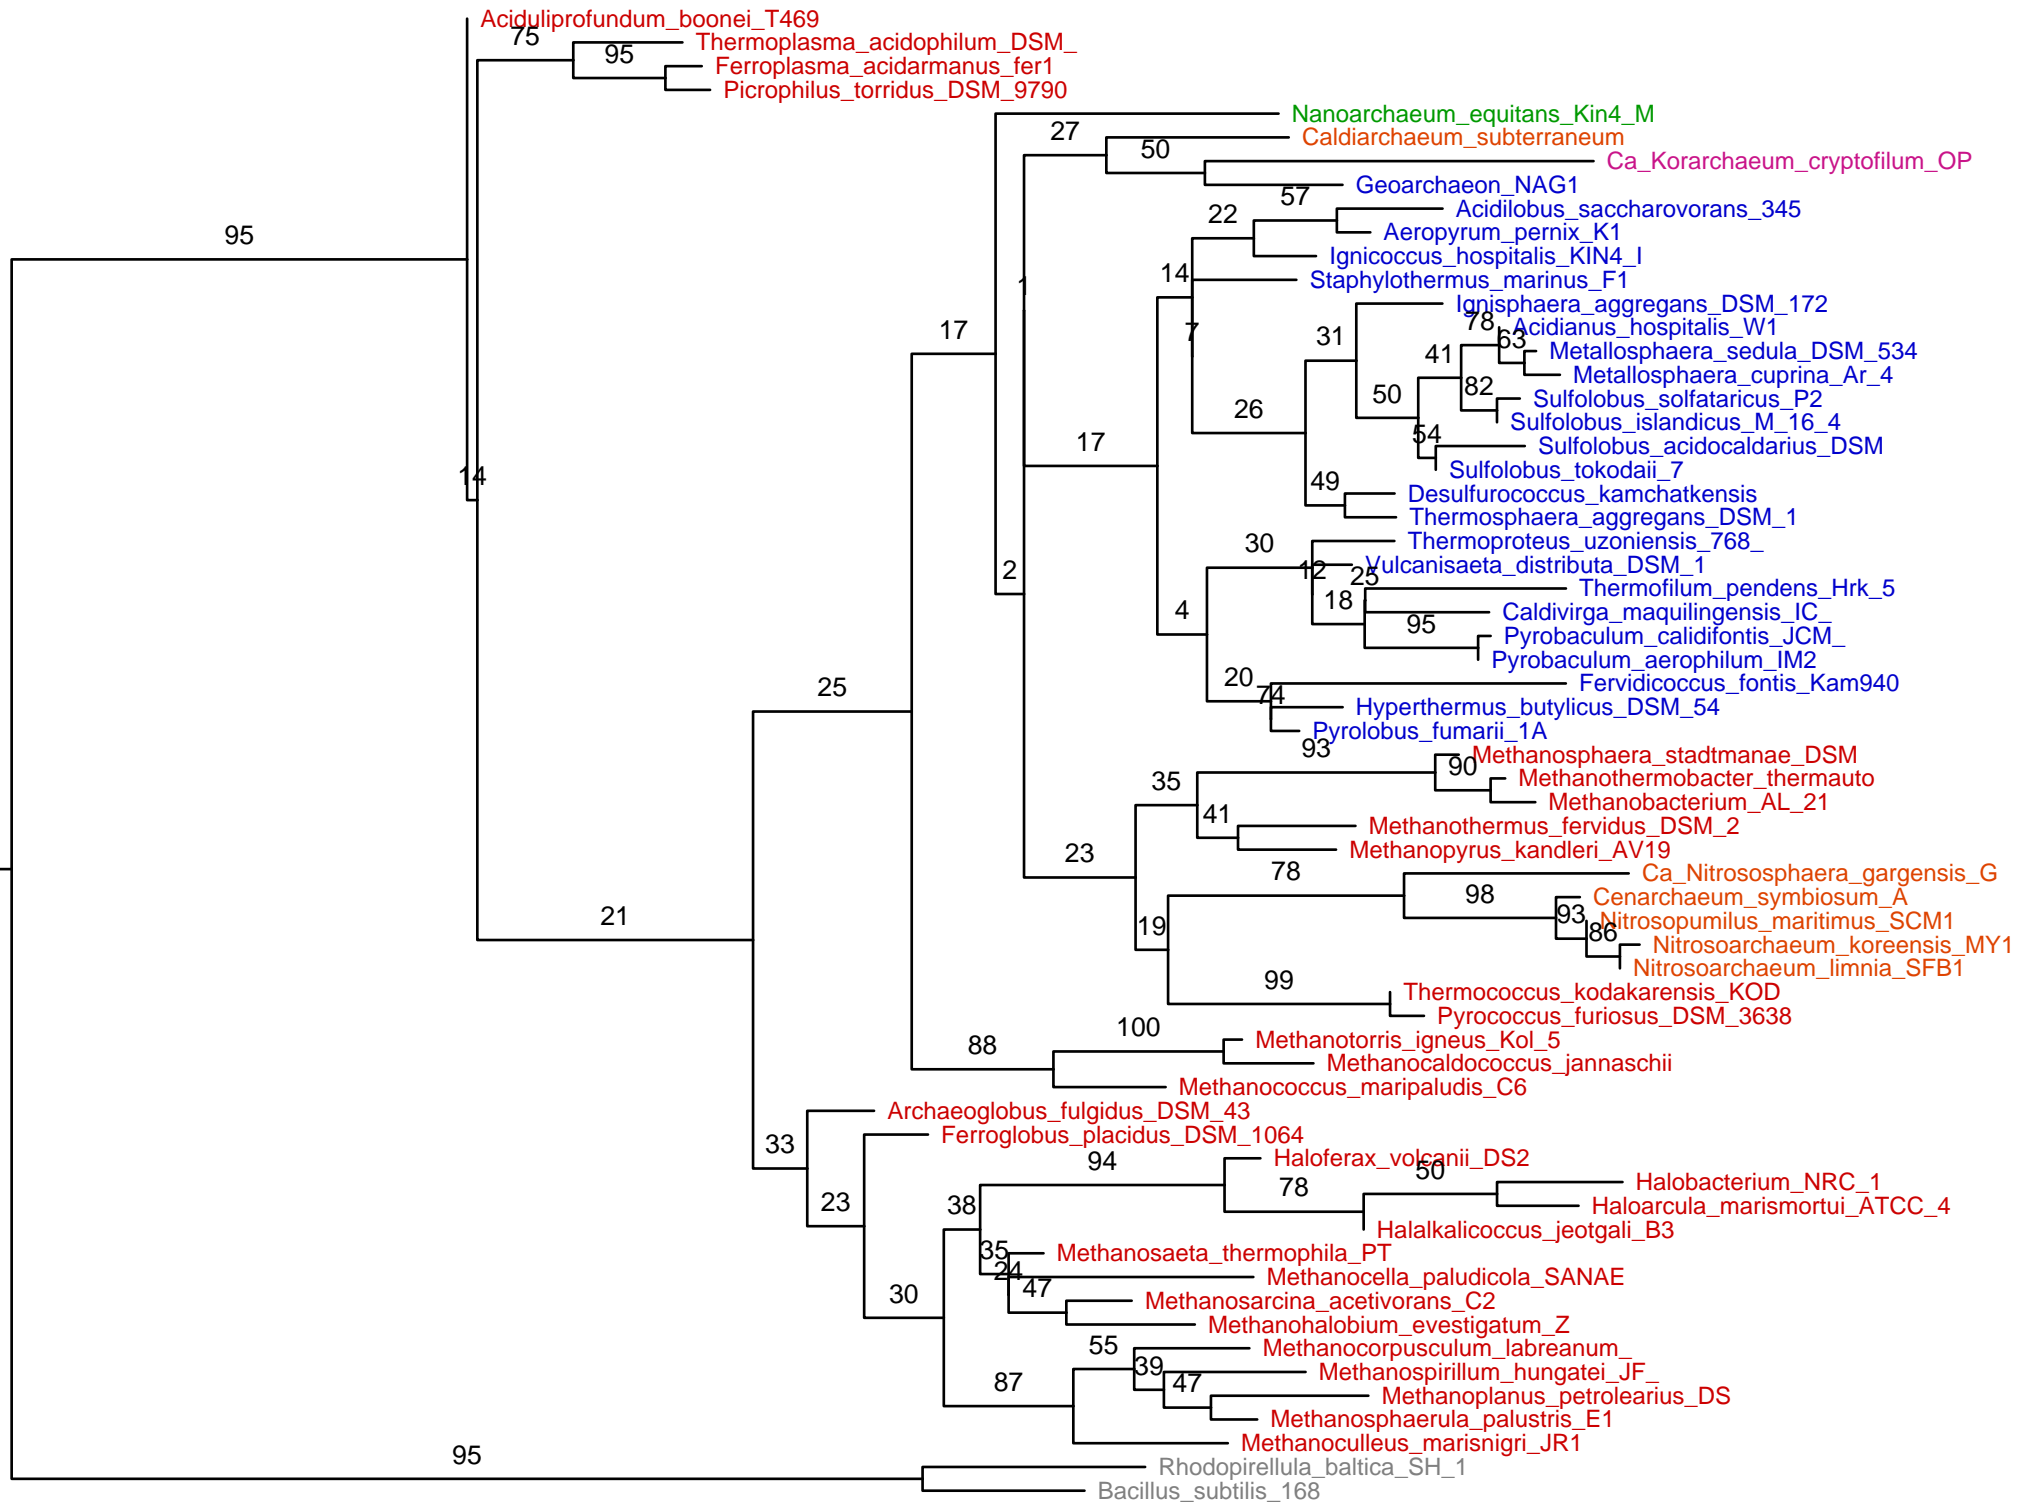

0.4

ML phylogeny of Ribosomal protein S14 (arCOG00782)

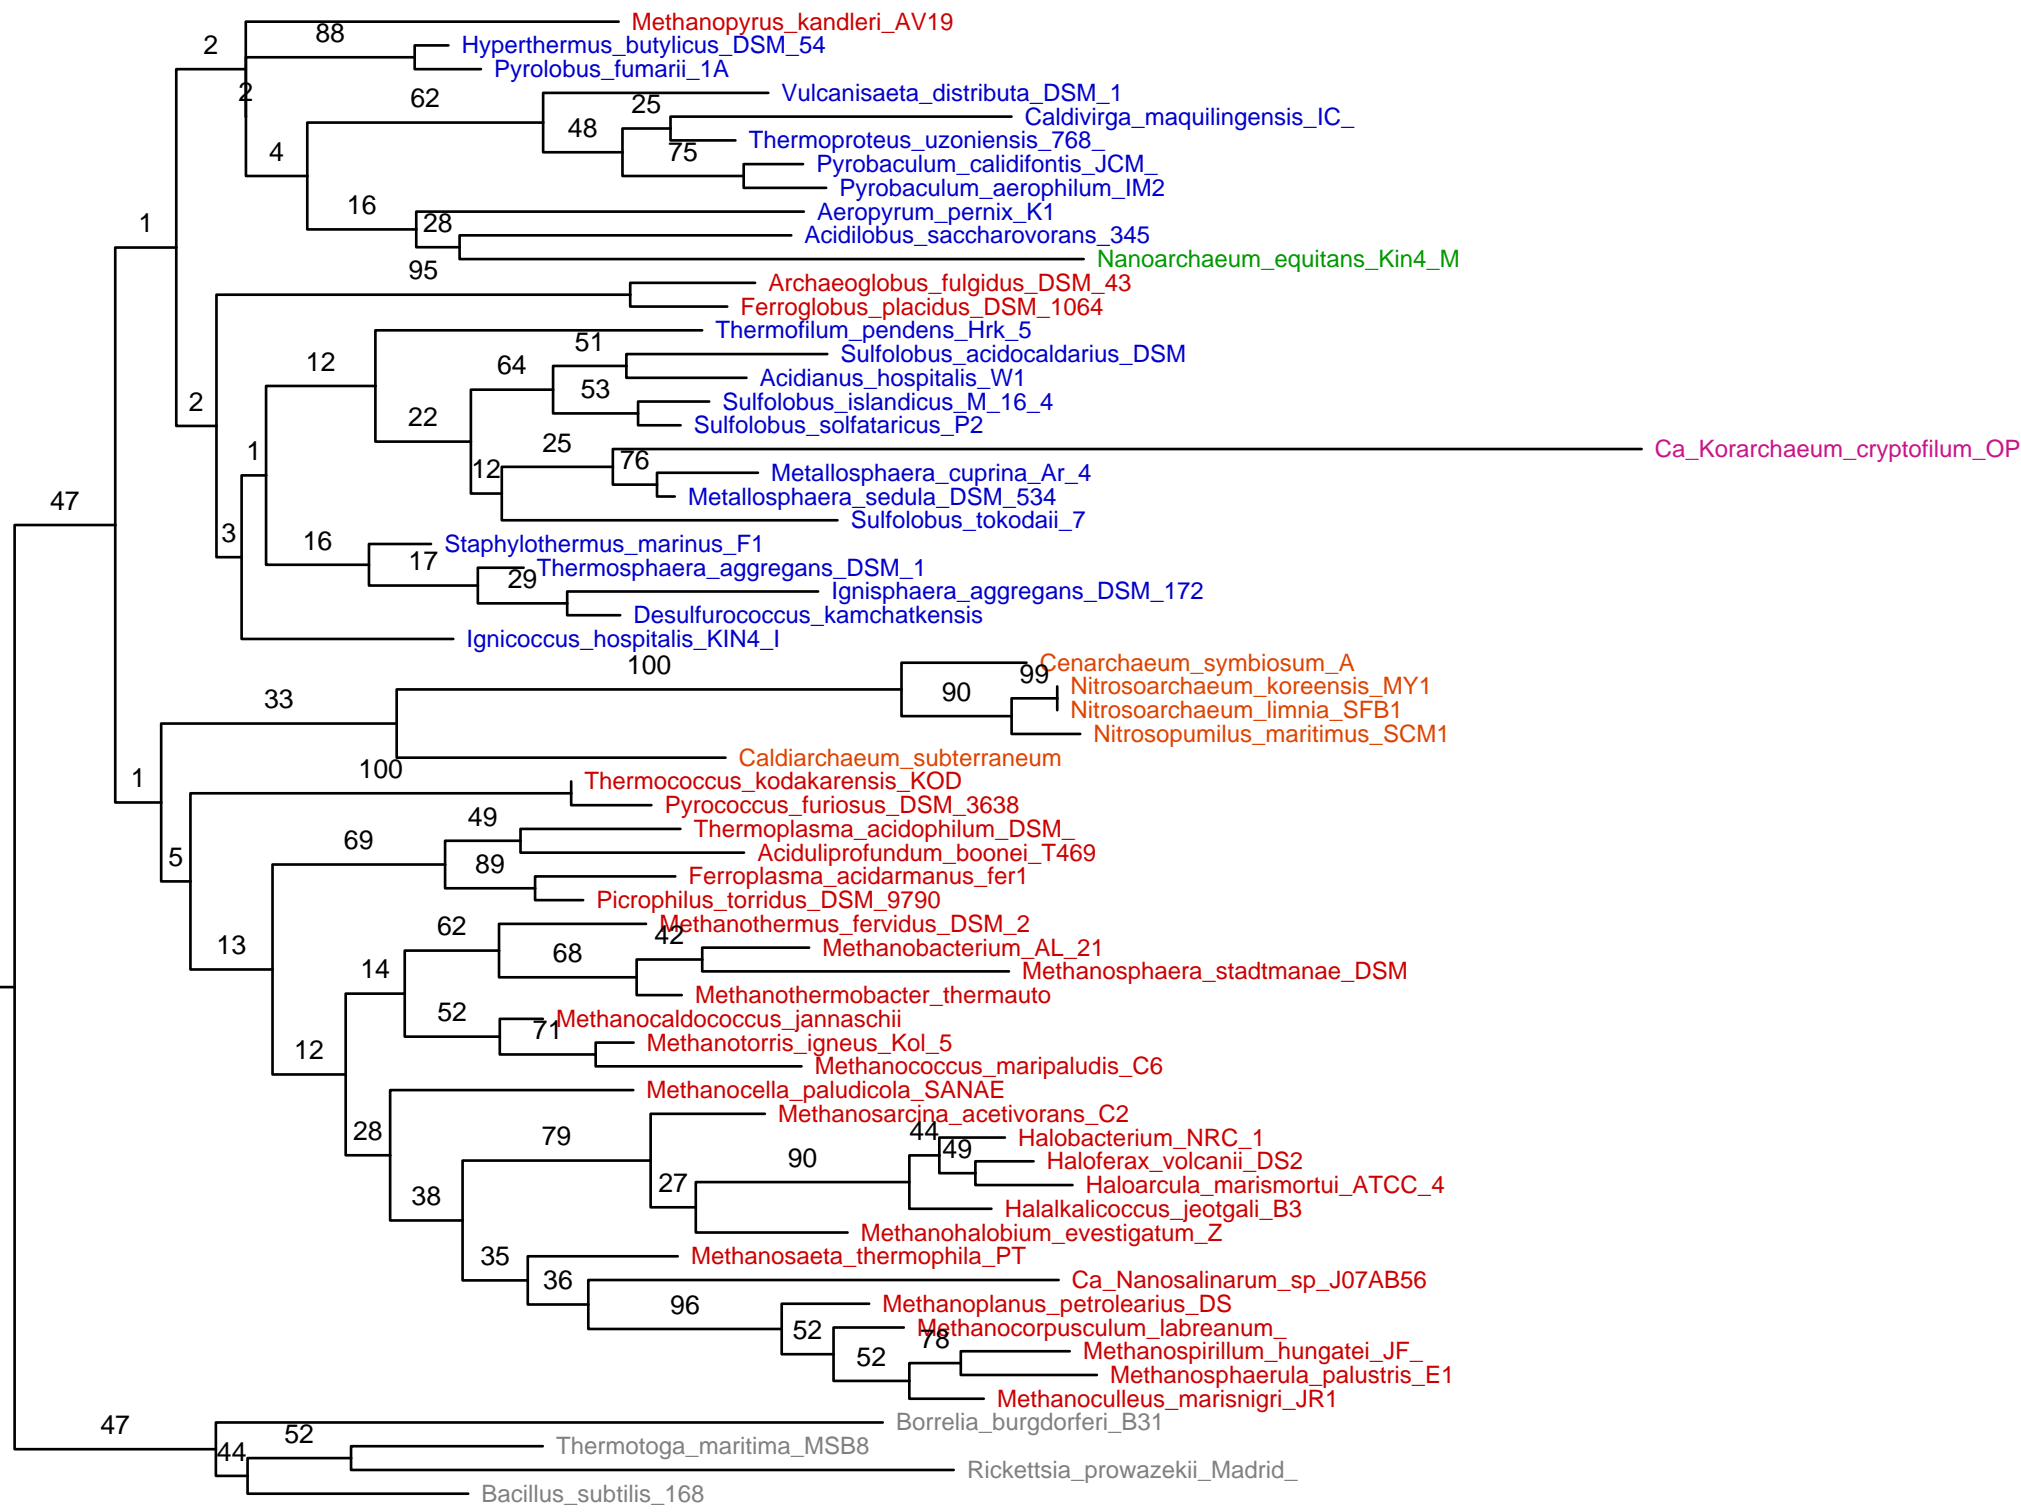

0.5

ML phylogeny of Ribosomal protein L29 (arCOG00785)

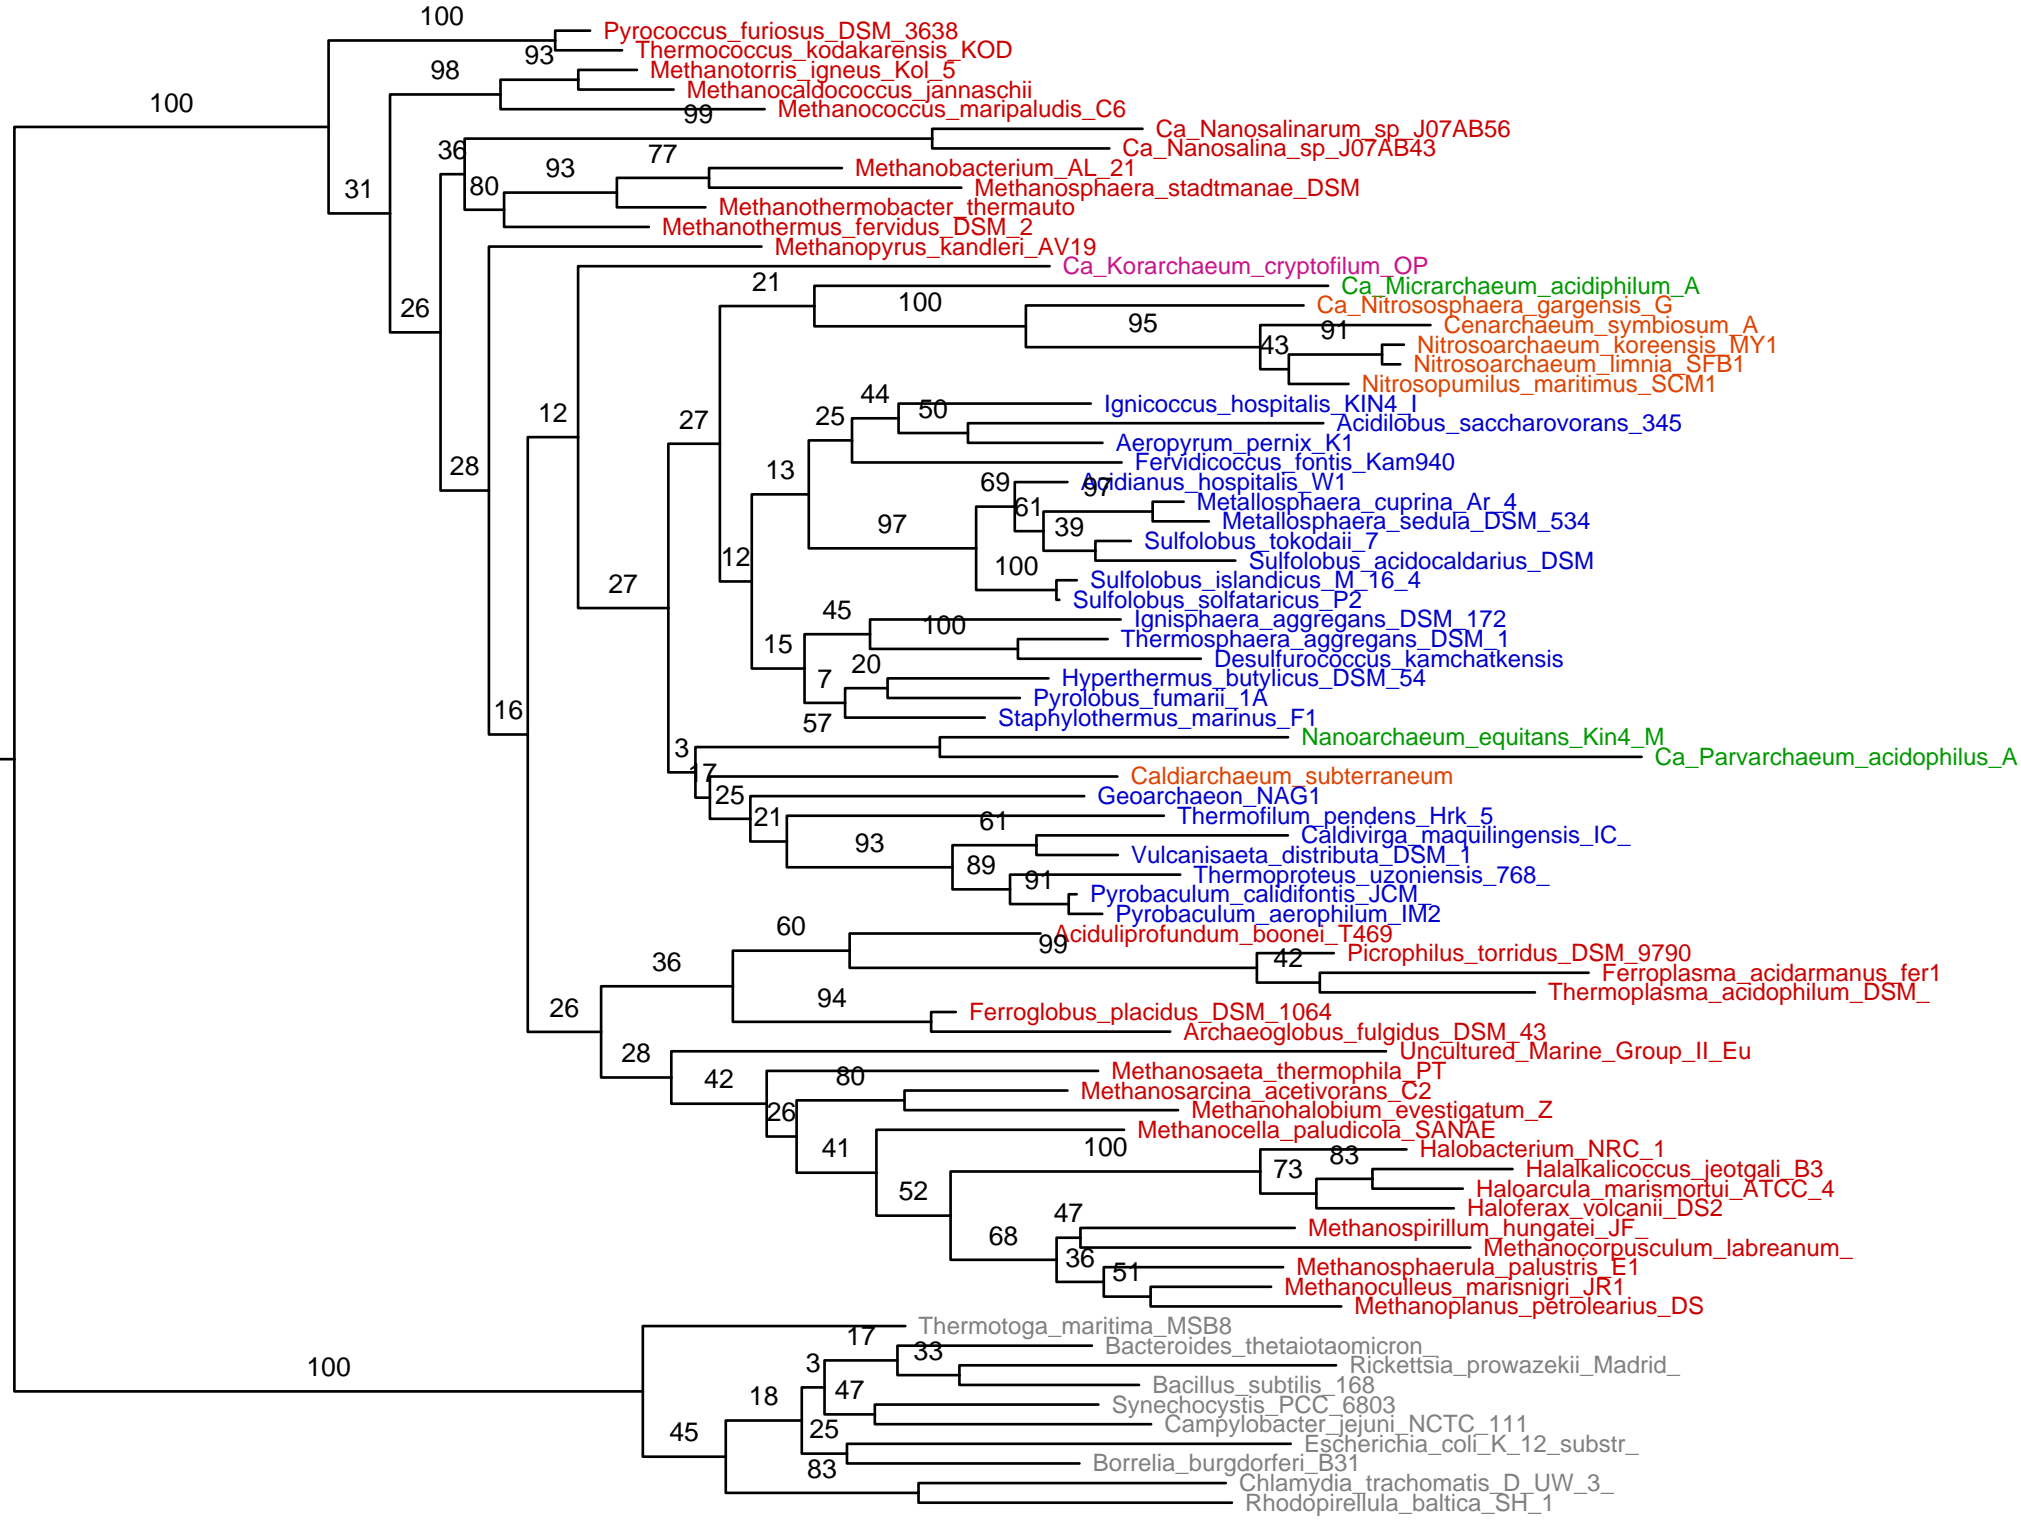

0.3

ML phylogeny of Ribosomal protein S13 (arCOG01722)

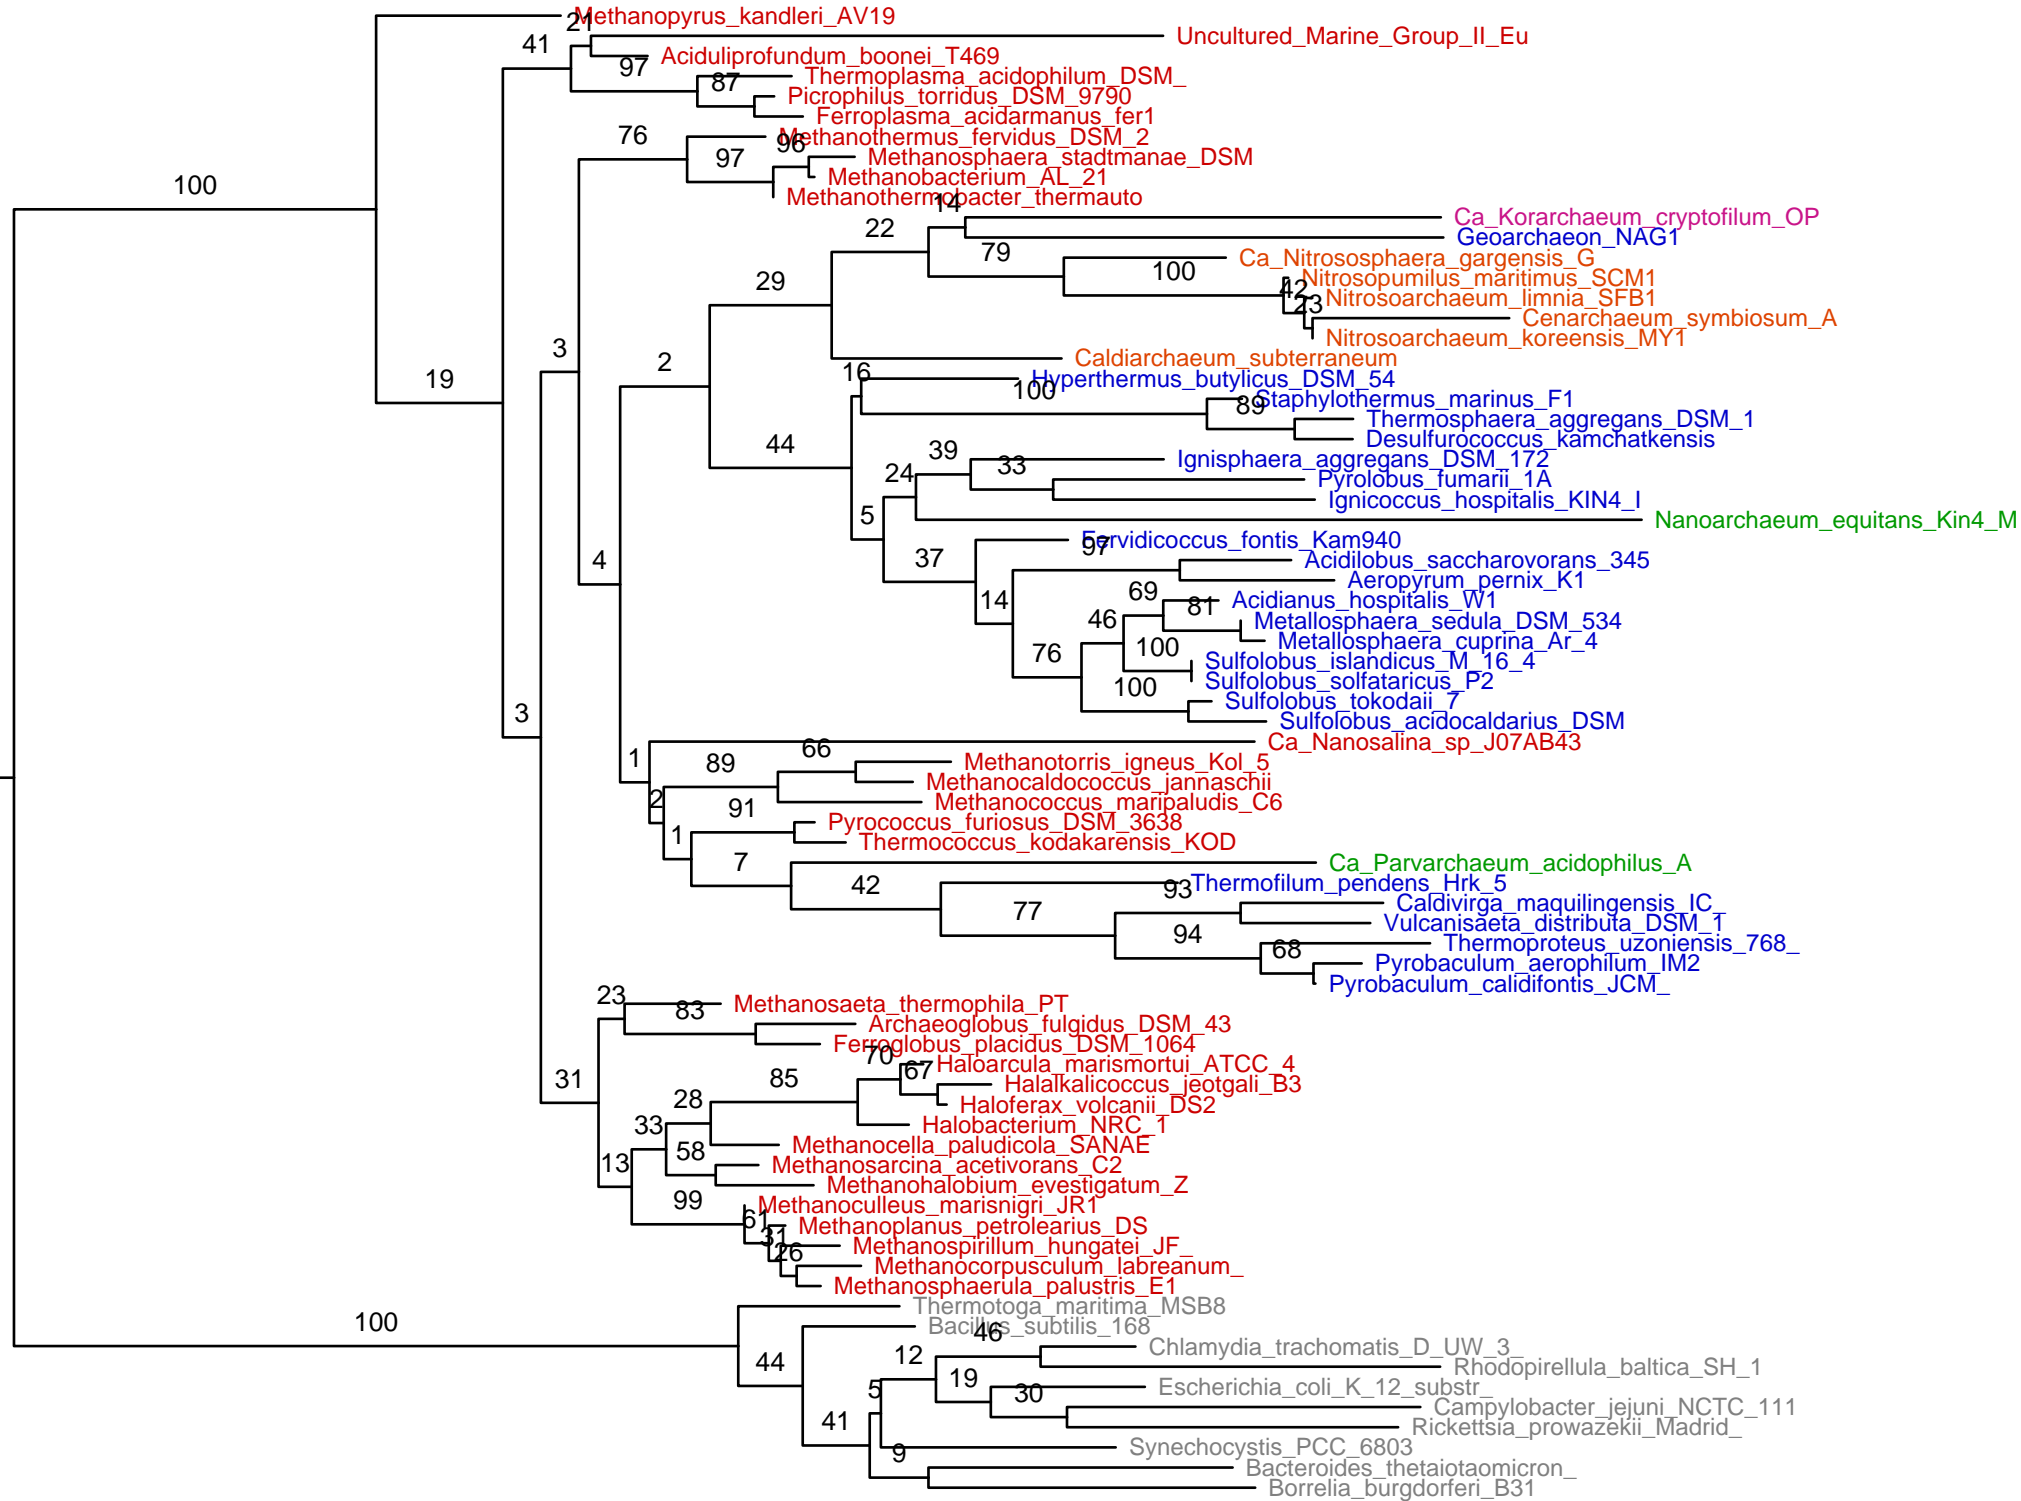

0.4

ML phylogeny of Ribosomal protein S10 (arCOG01758)

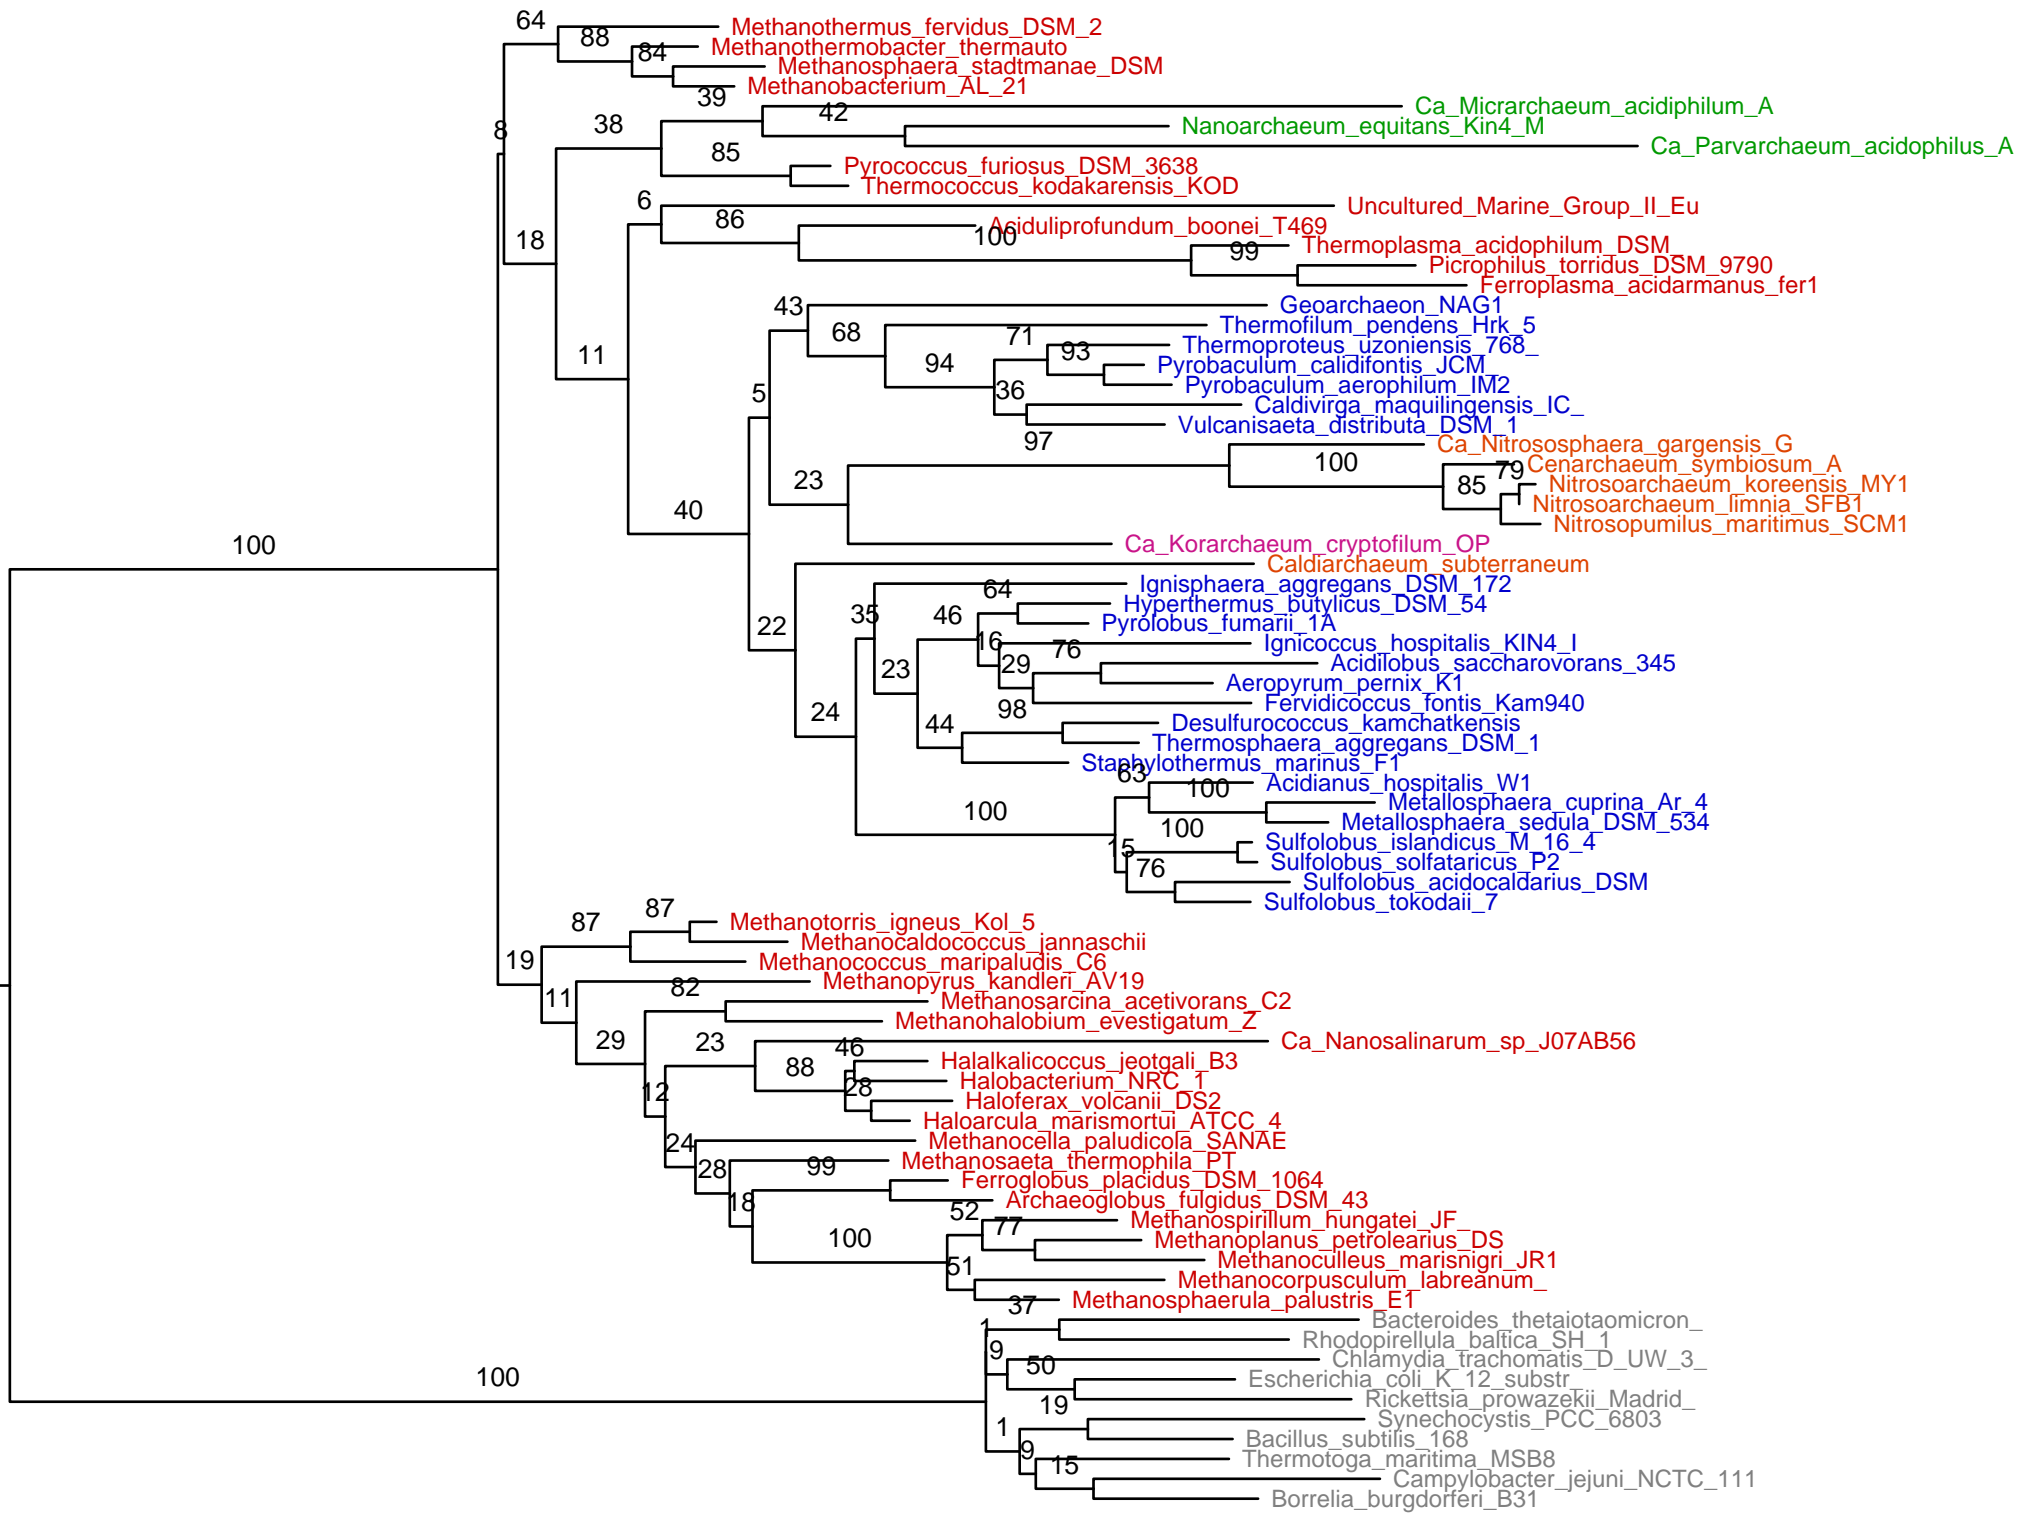

ML phylogeny of Ribosomal protein L2 (arCOG04067)

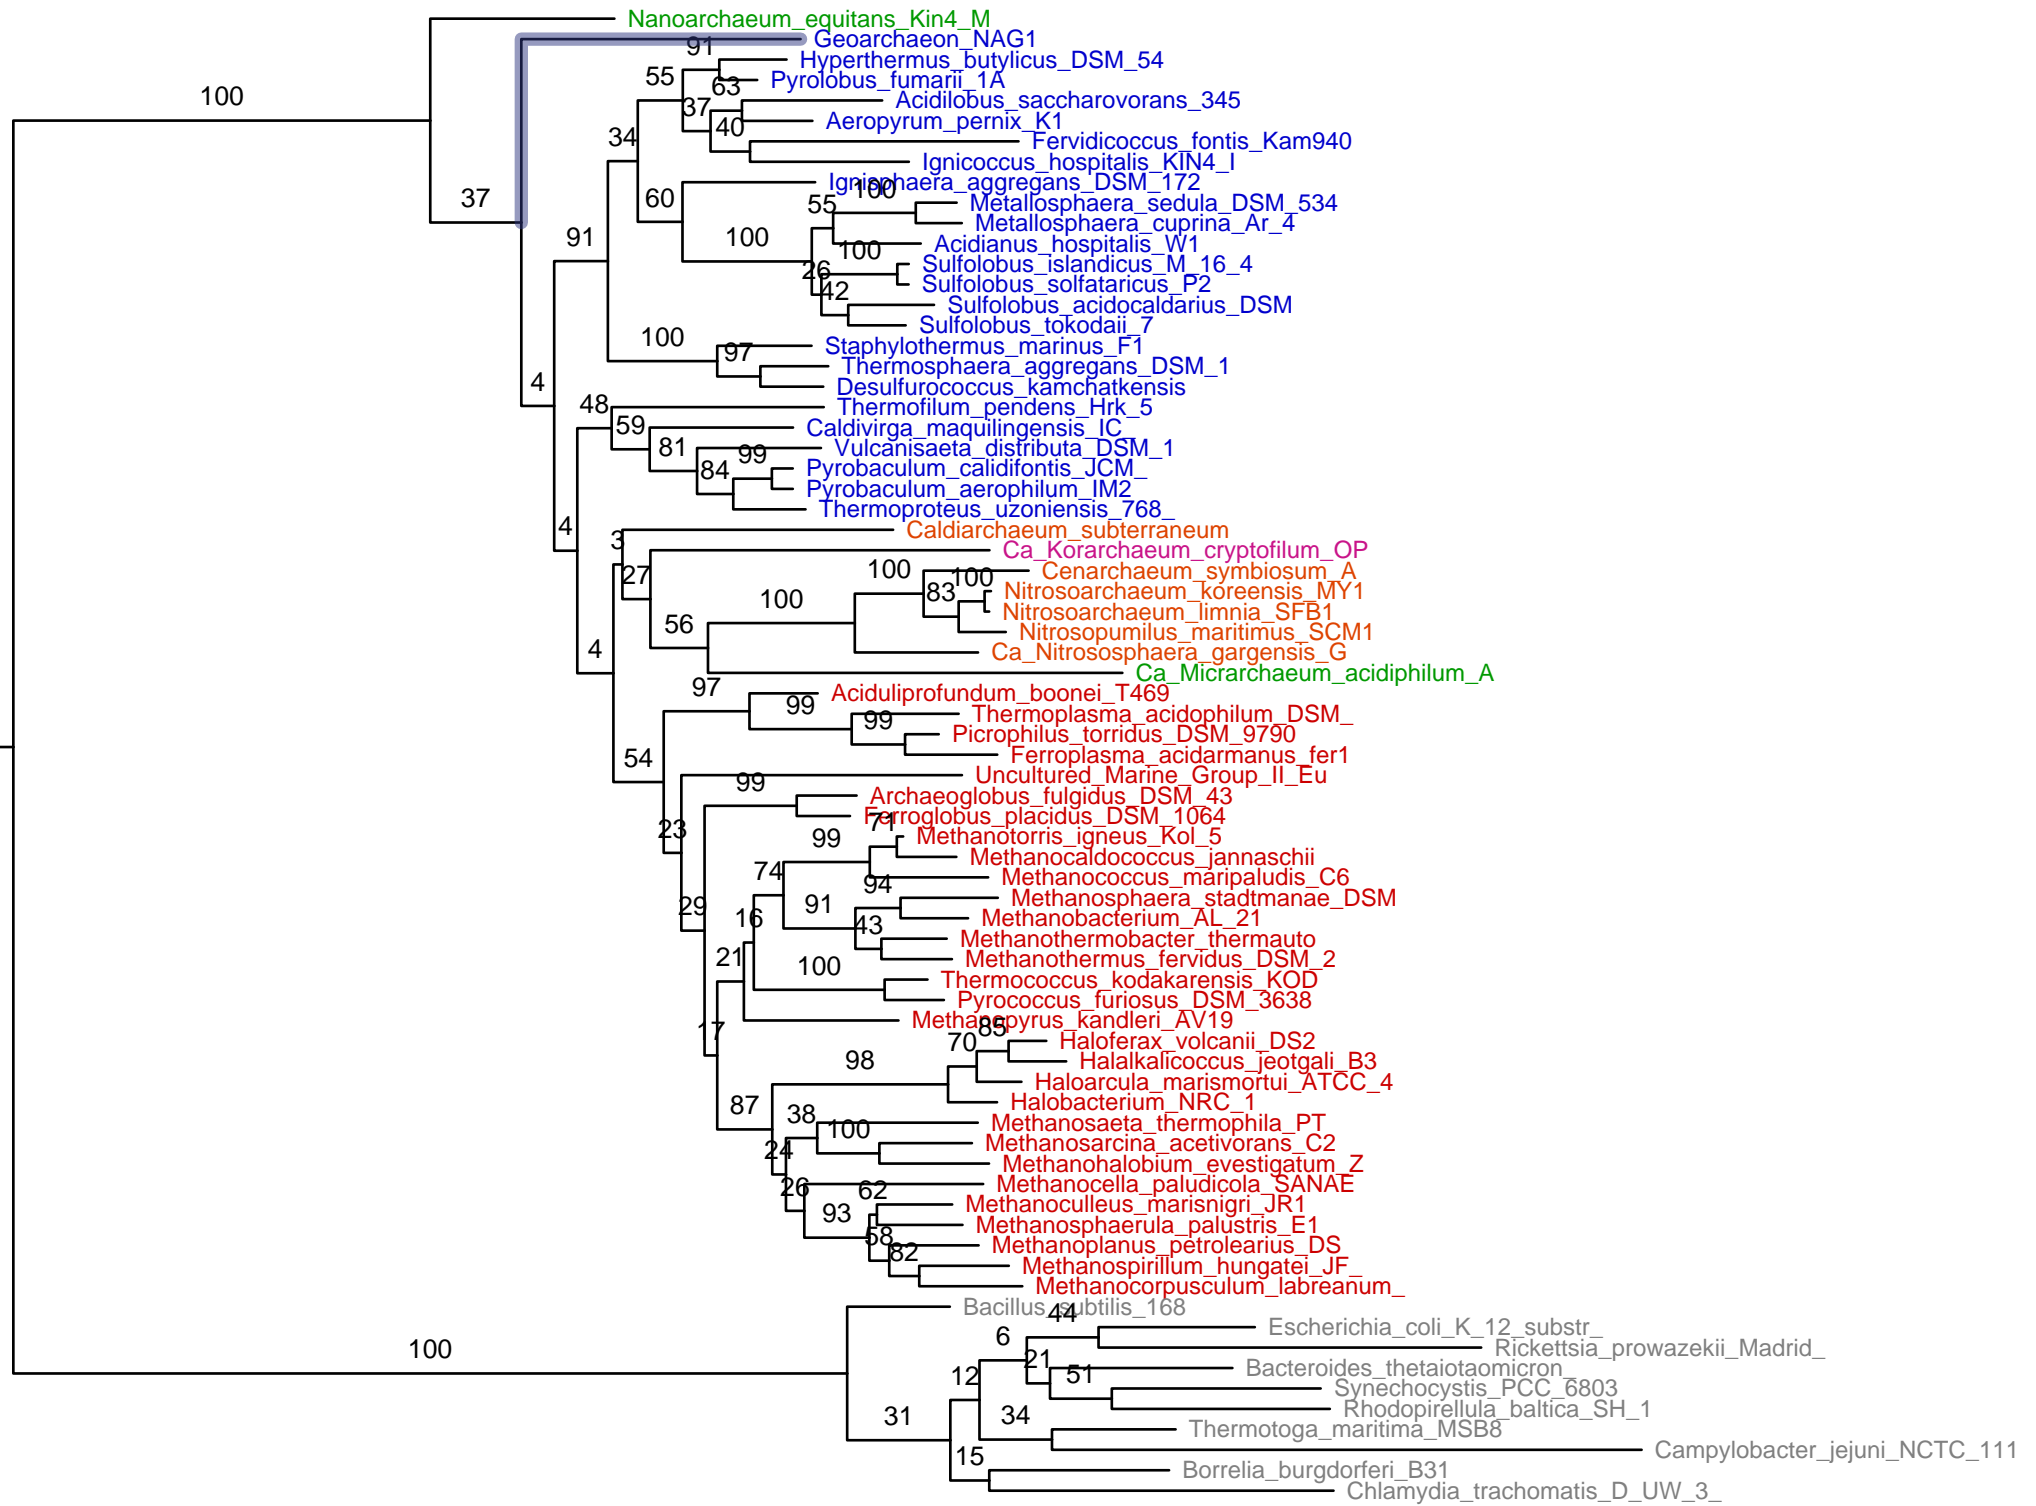

ML phylogeny of Ribosomal protein L3 (arCOG04070)

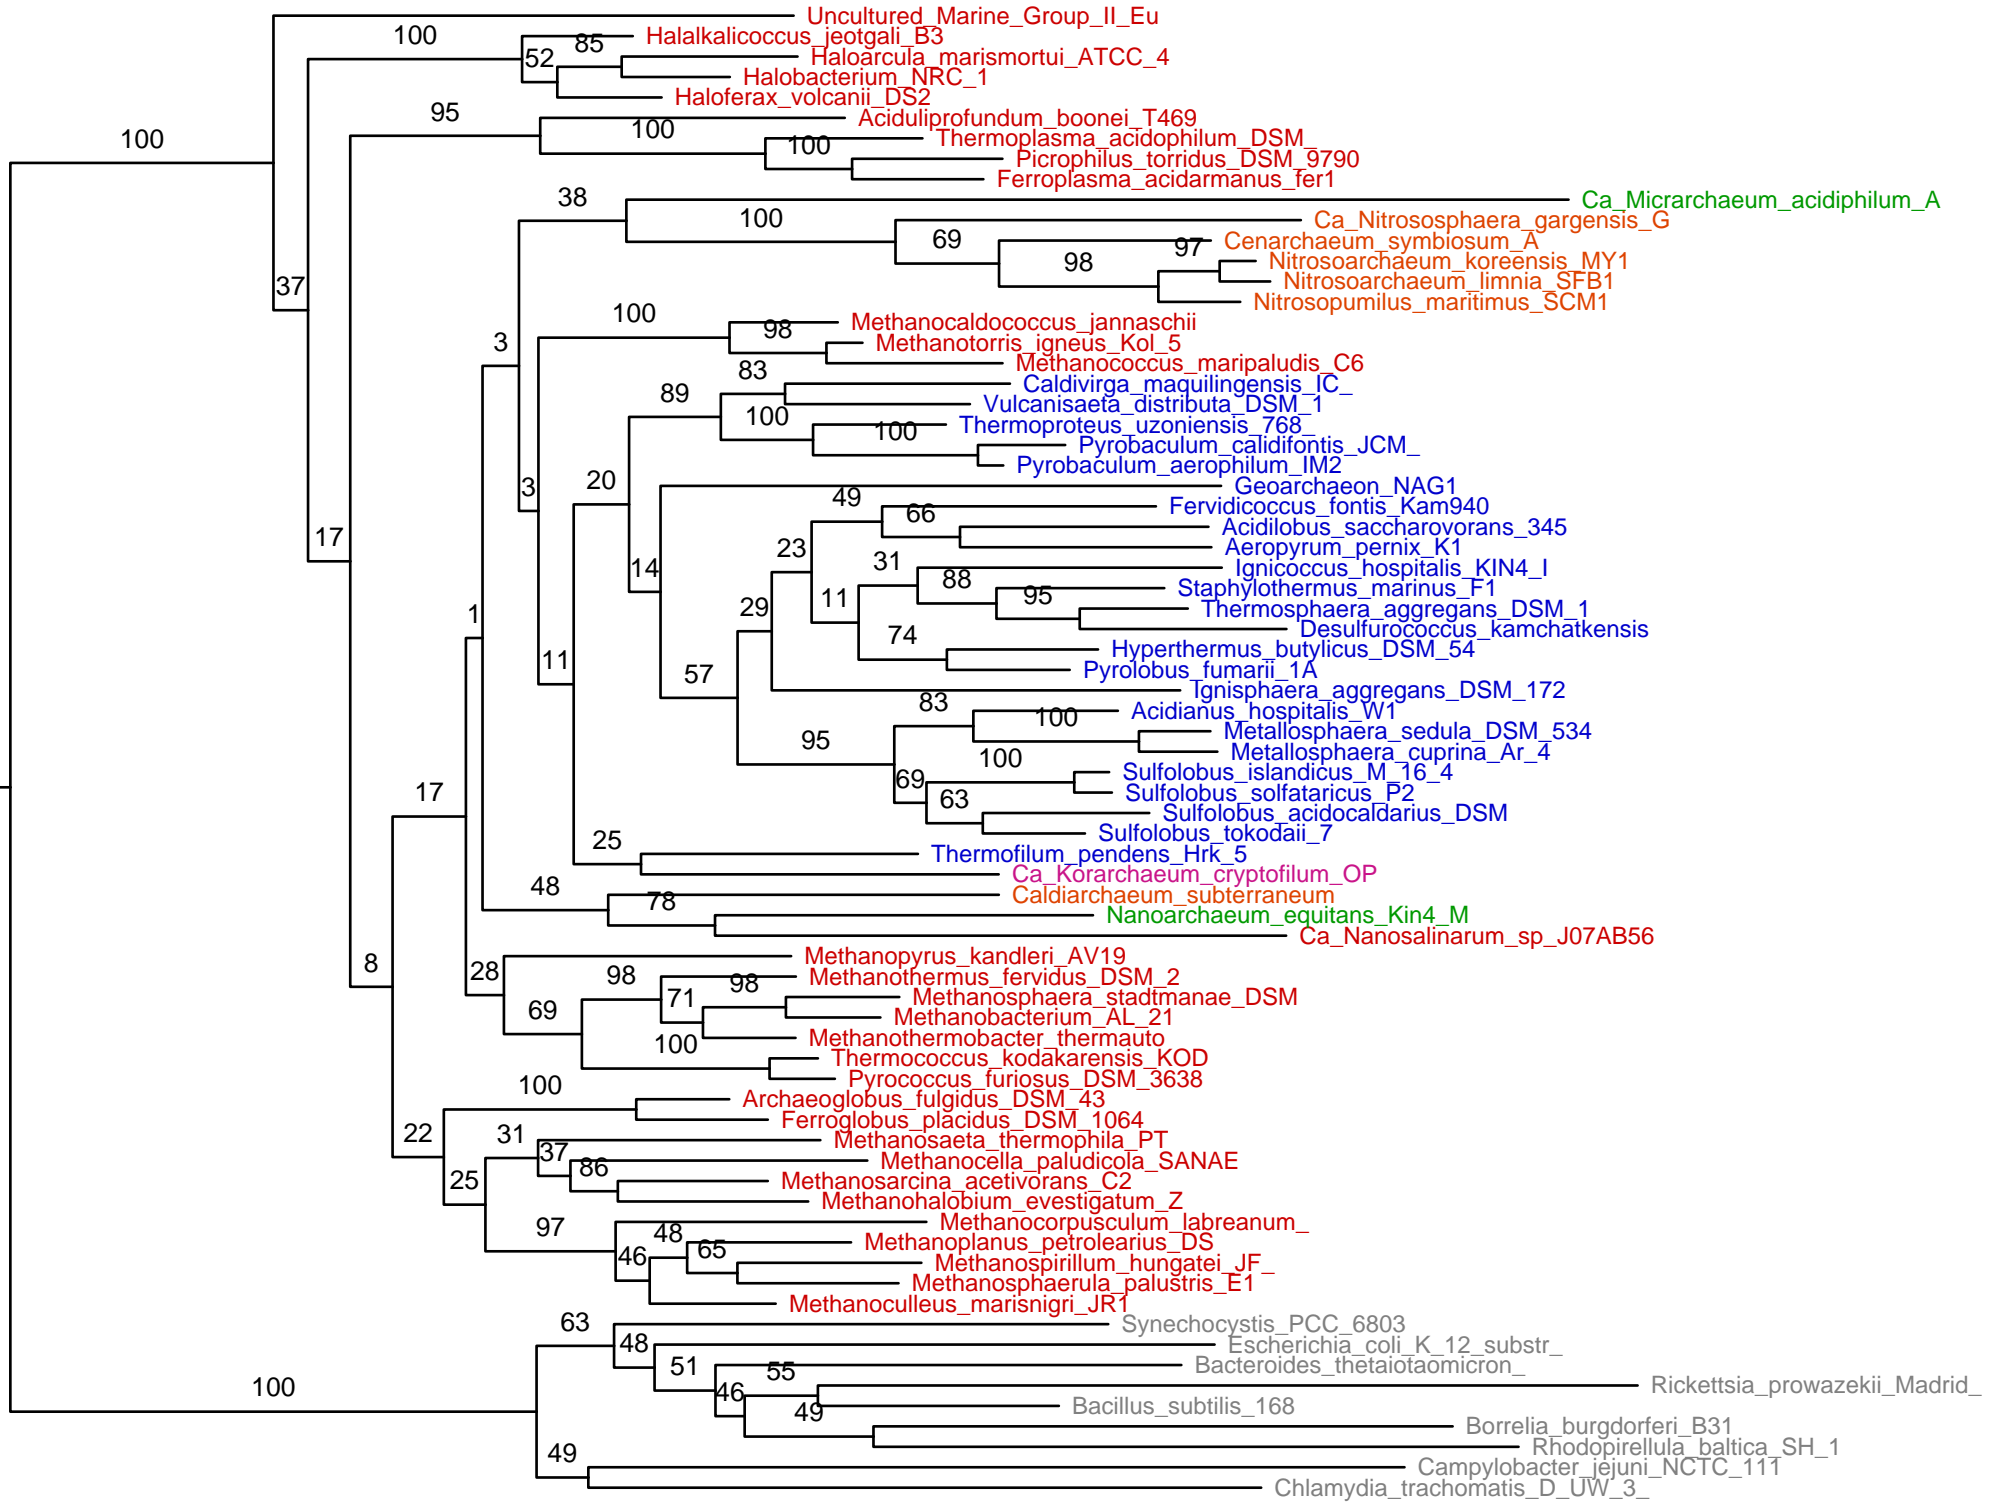

0.3

ML phylogeny of Ribosomal protein L4 (arCOG04071)



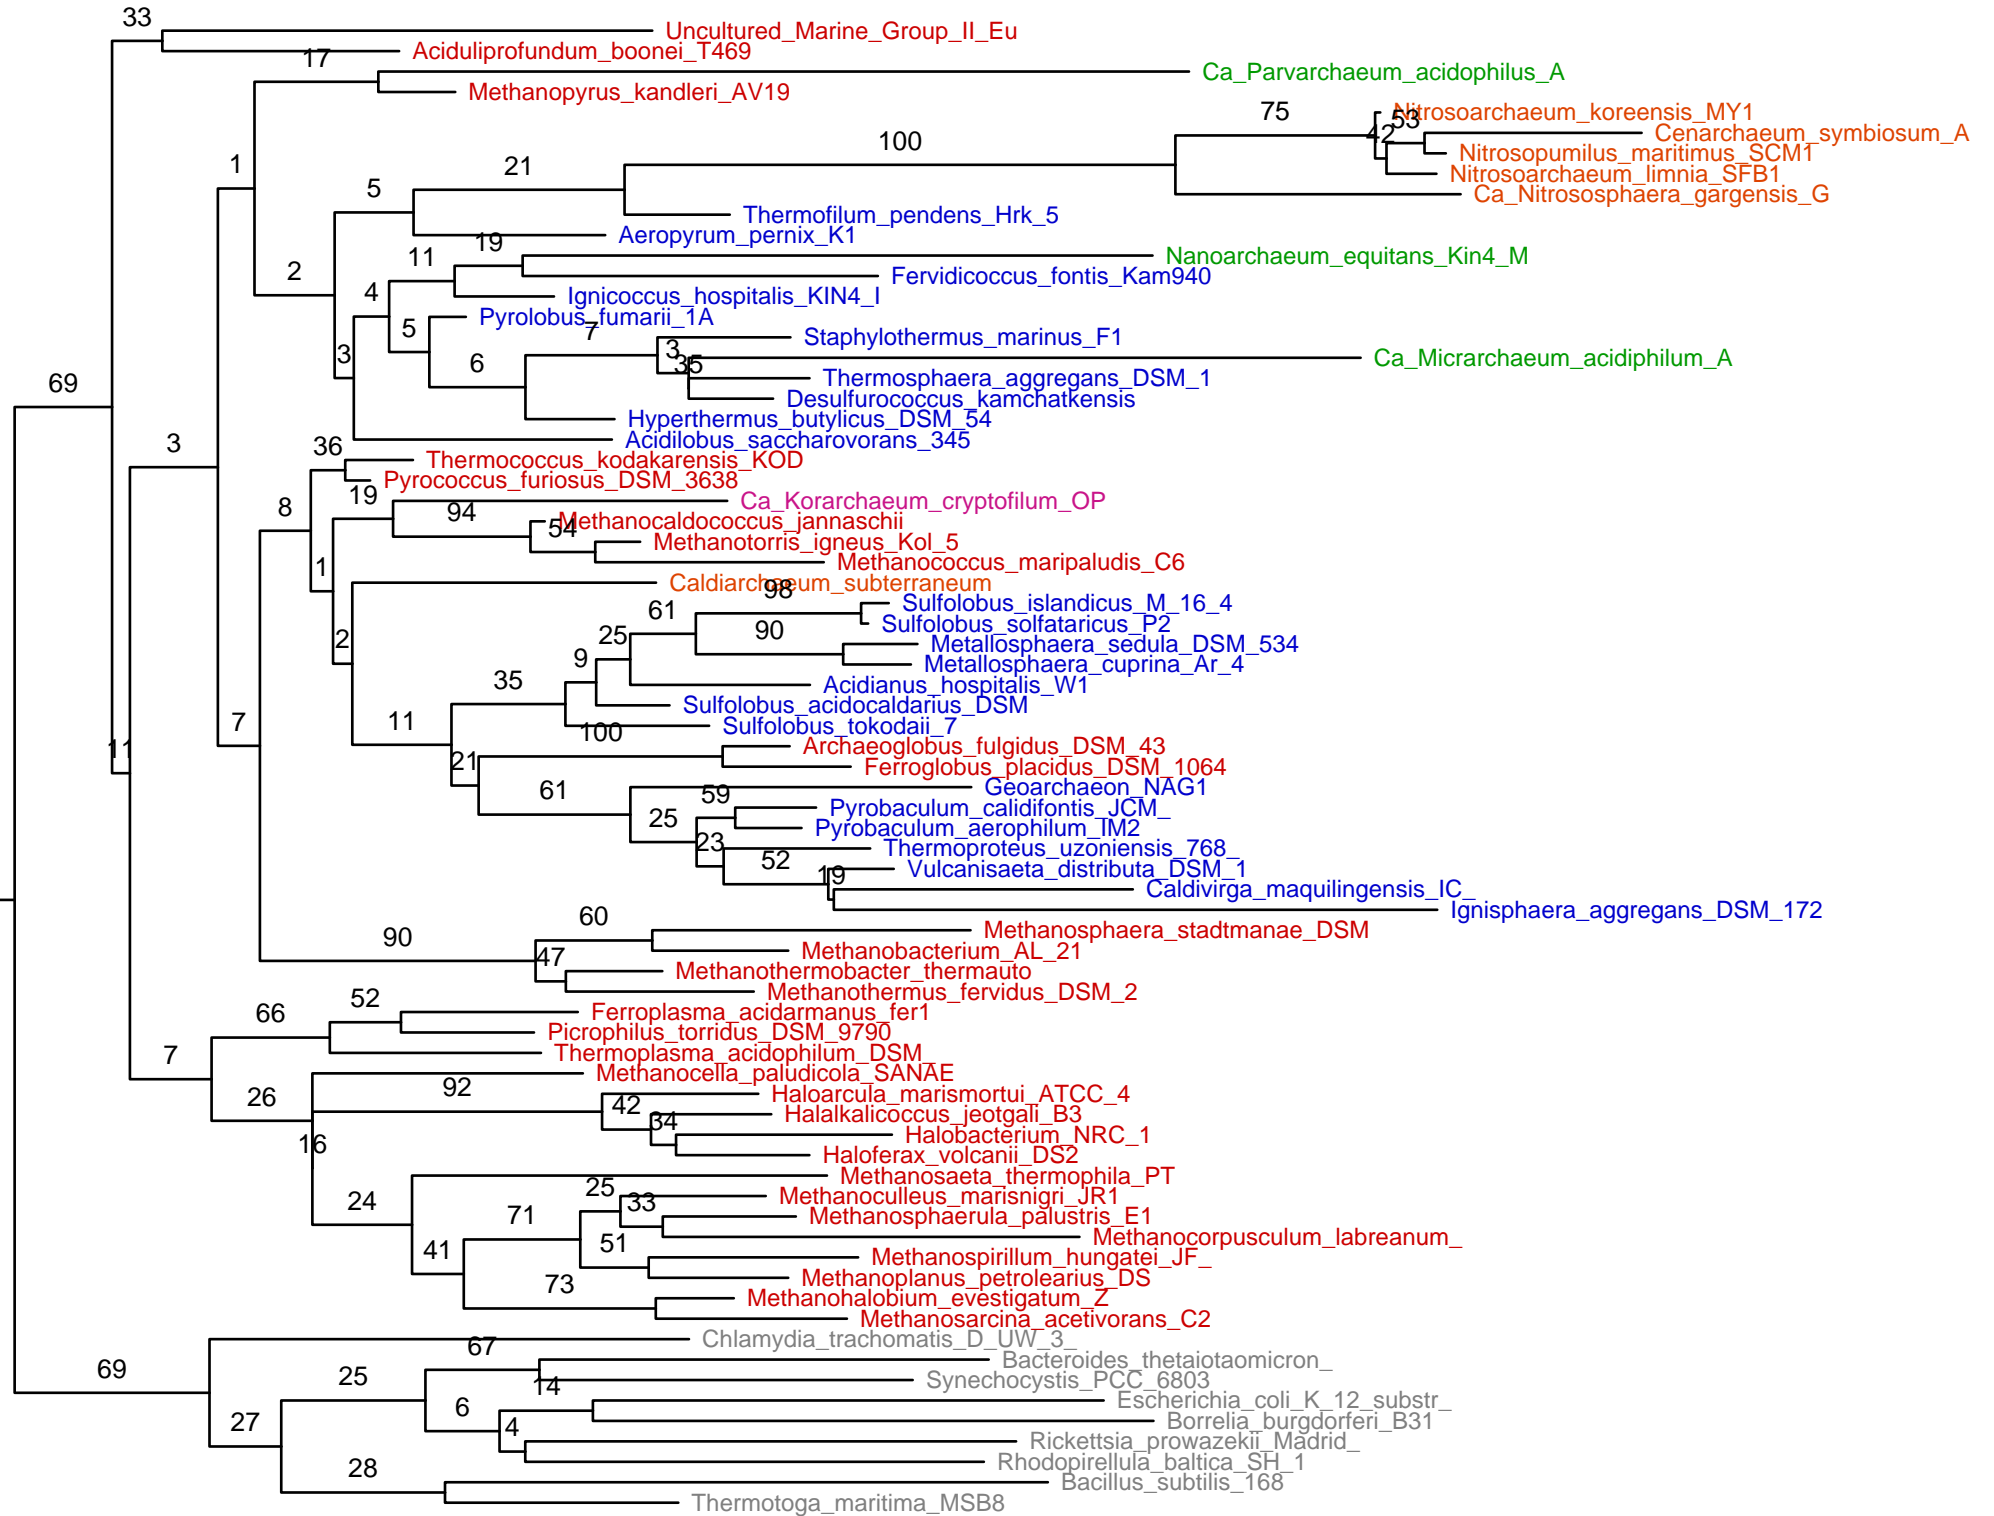

0.4

ML phylogeny of Ribosomal protein L23 (arCOG04072)

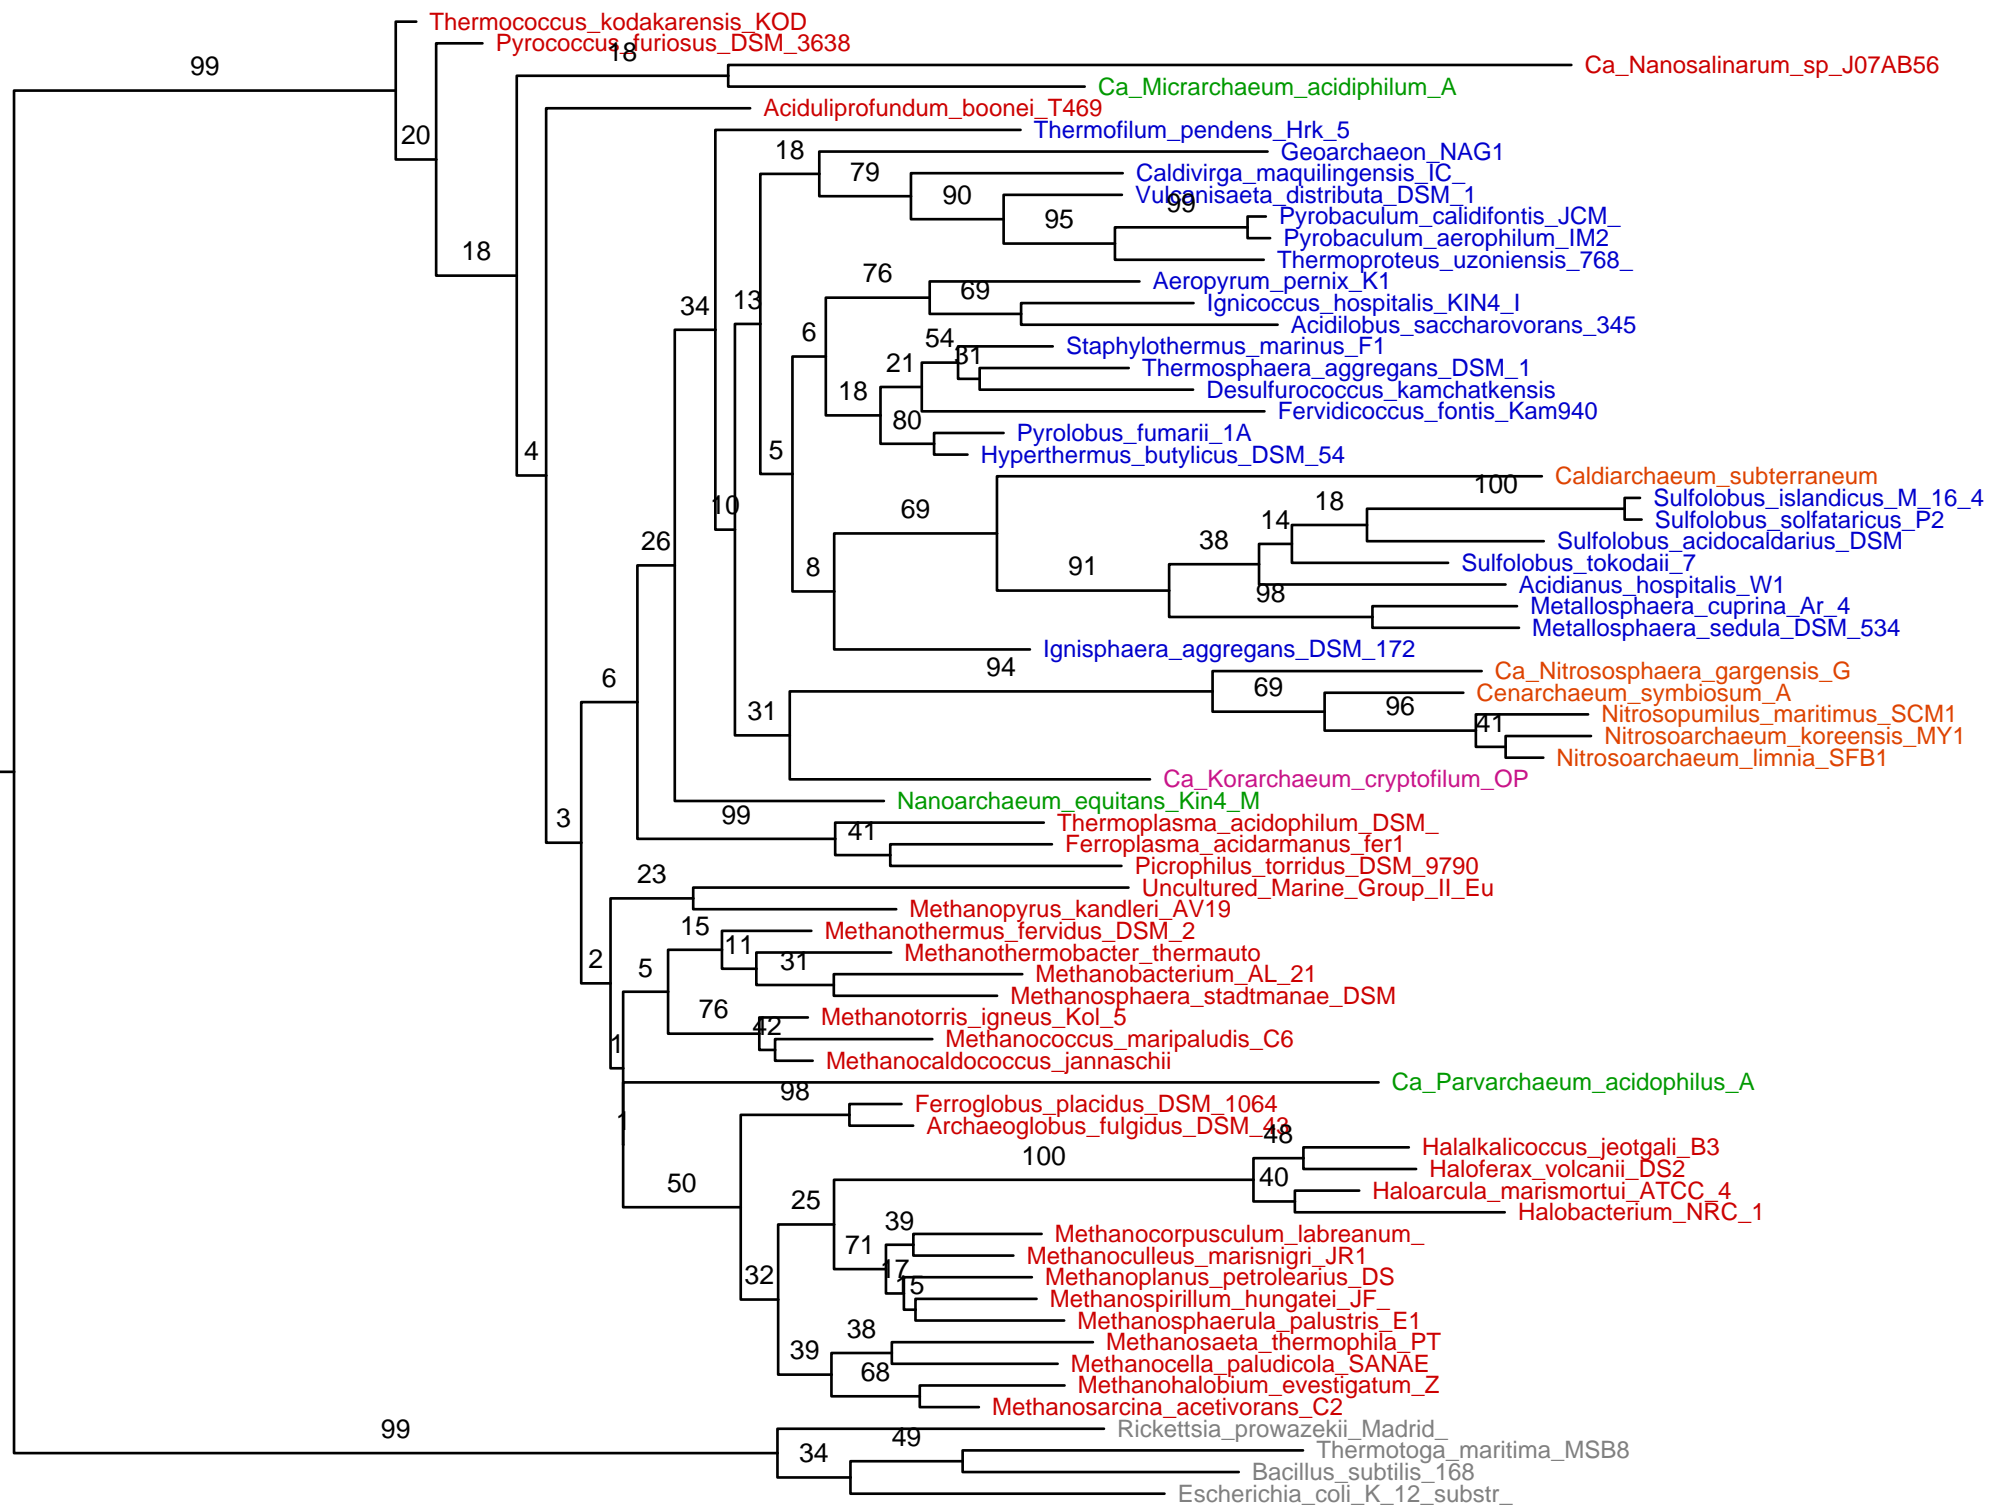

0.3

ML phylogeny of Ribosomal protein L30 (arCOG04086)

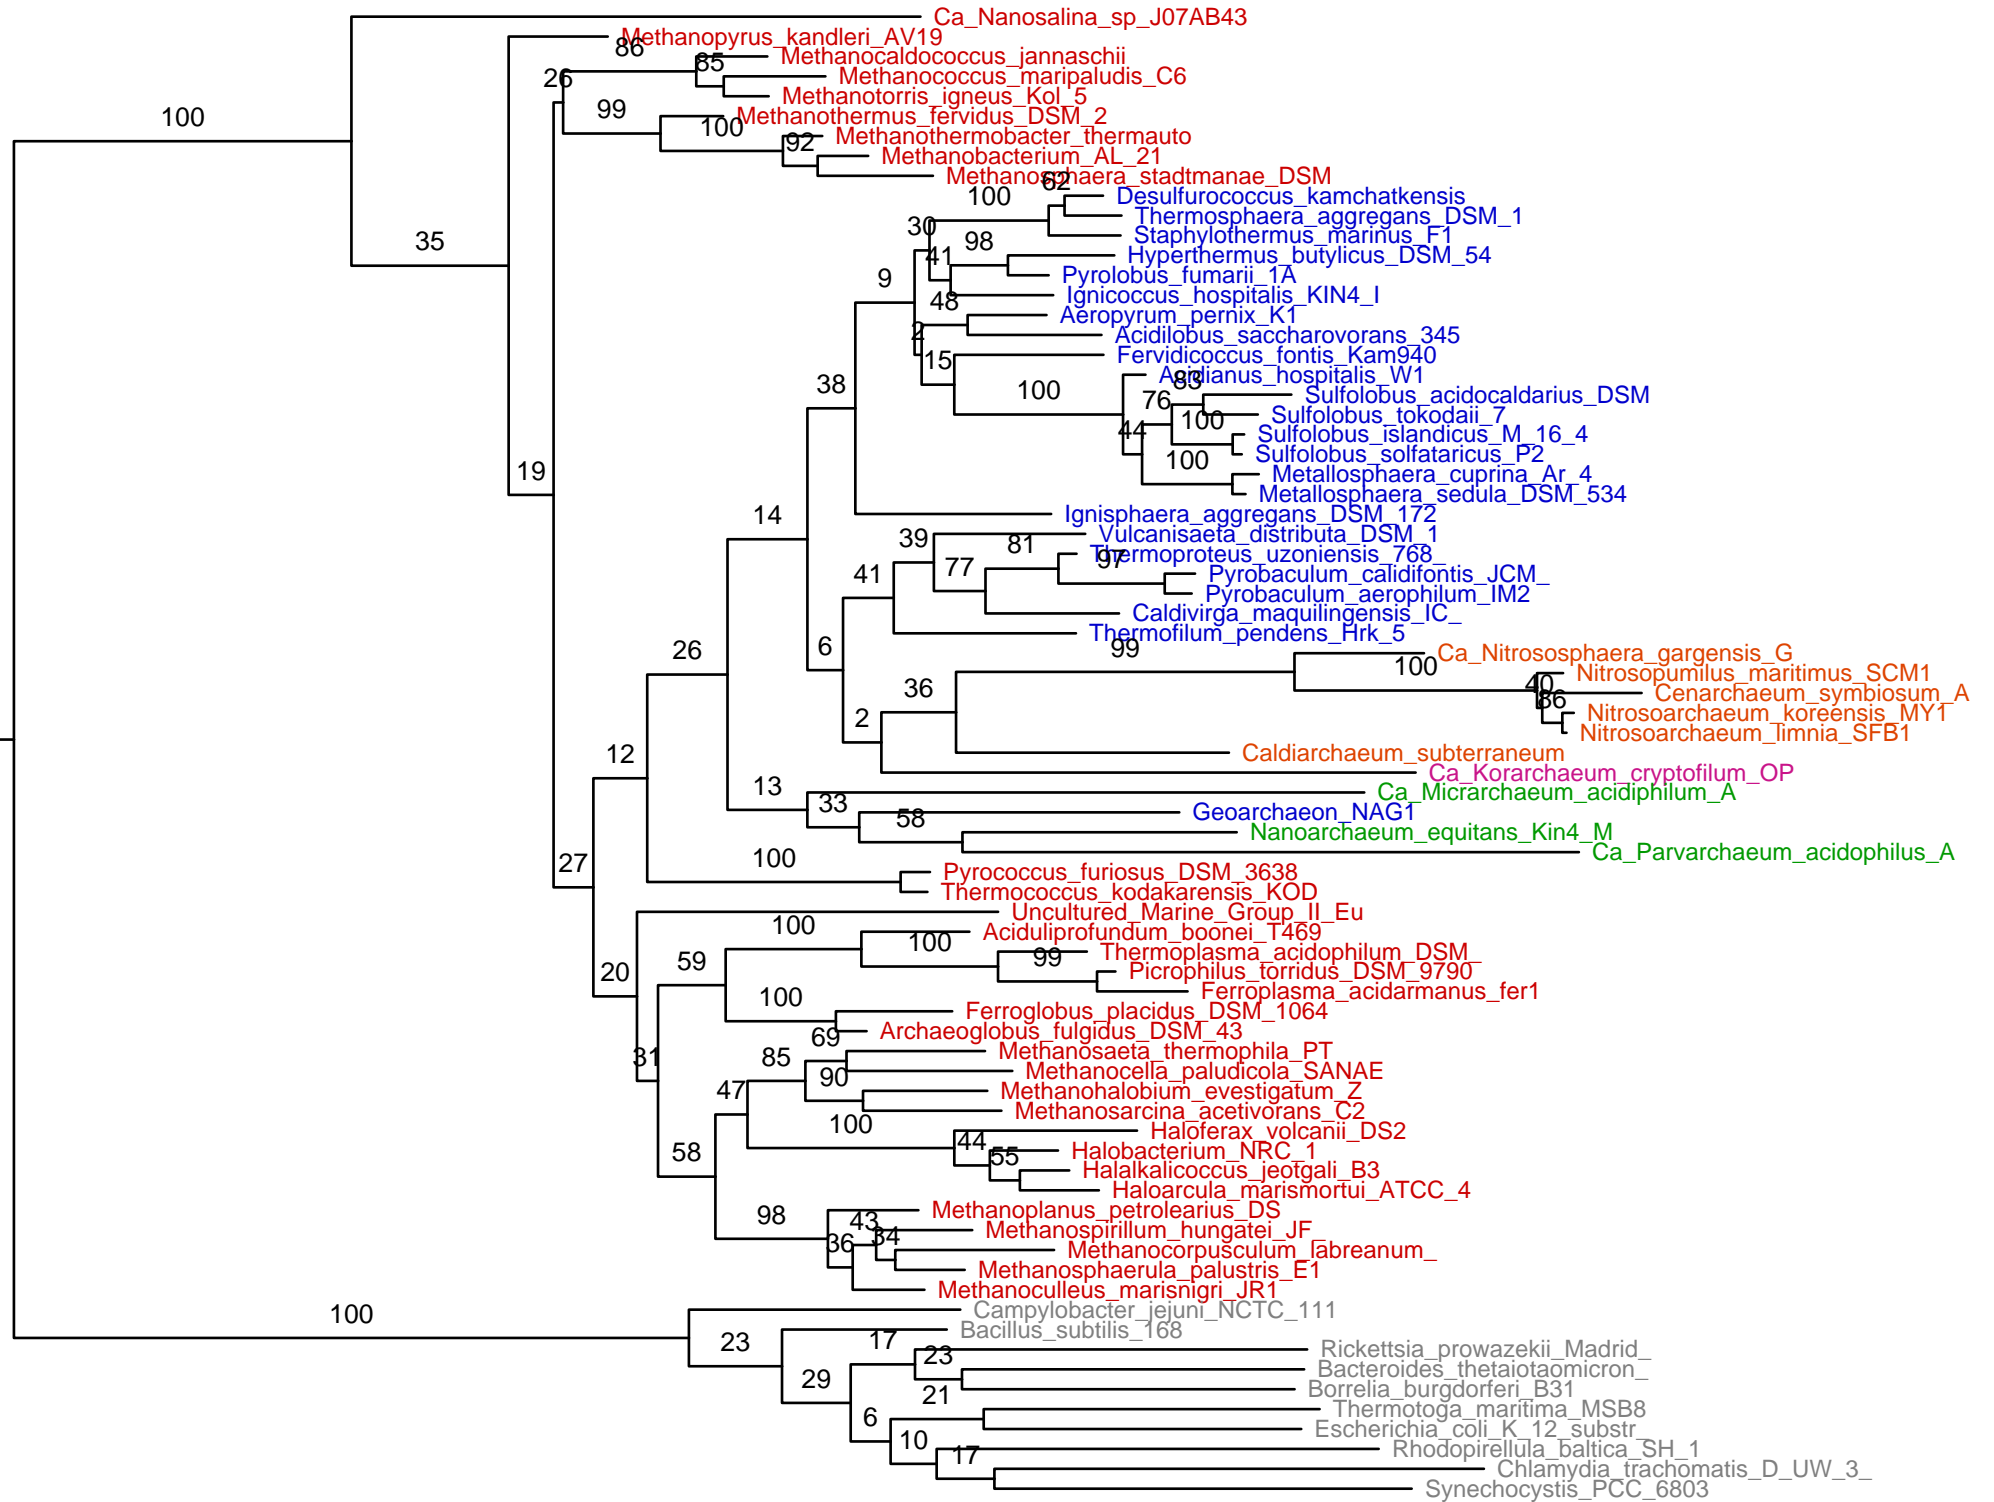

ML phylogeny of Ribosomal protein S5 (arCOG04087)

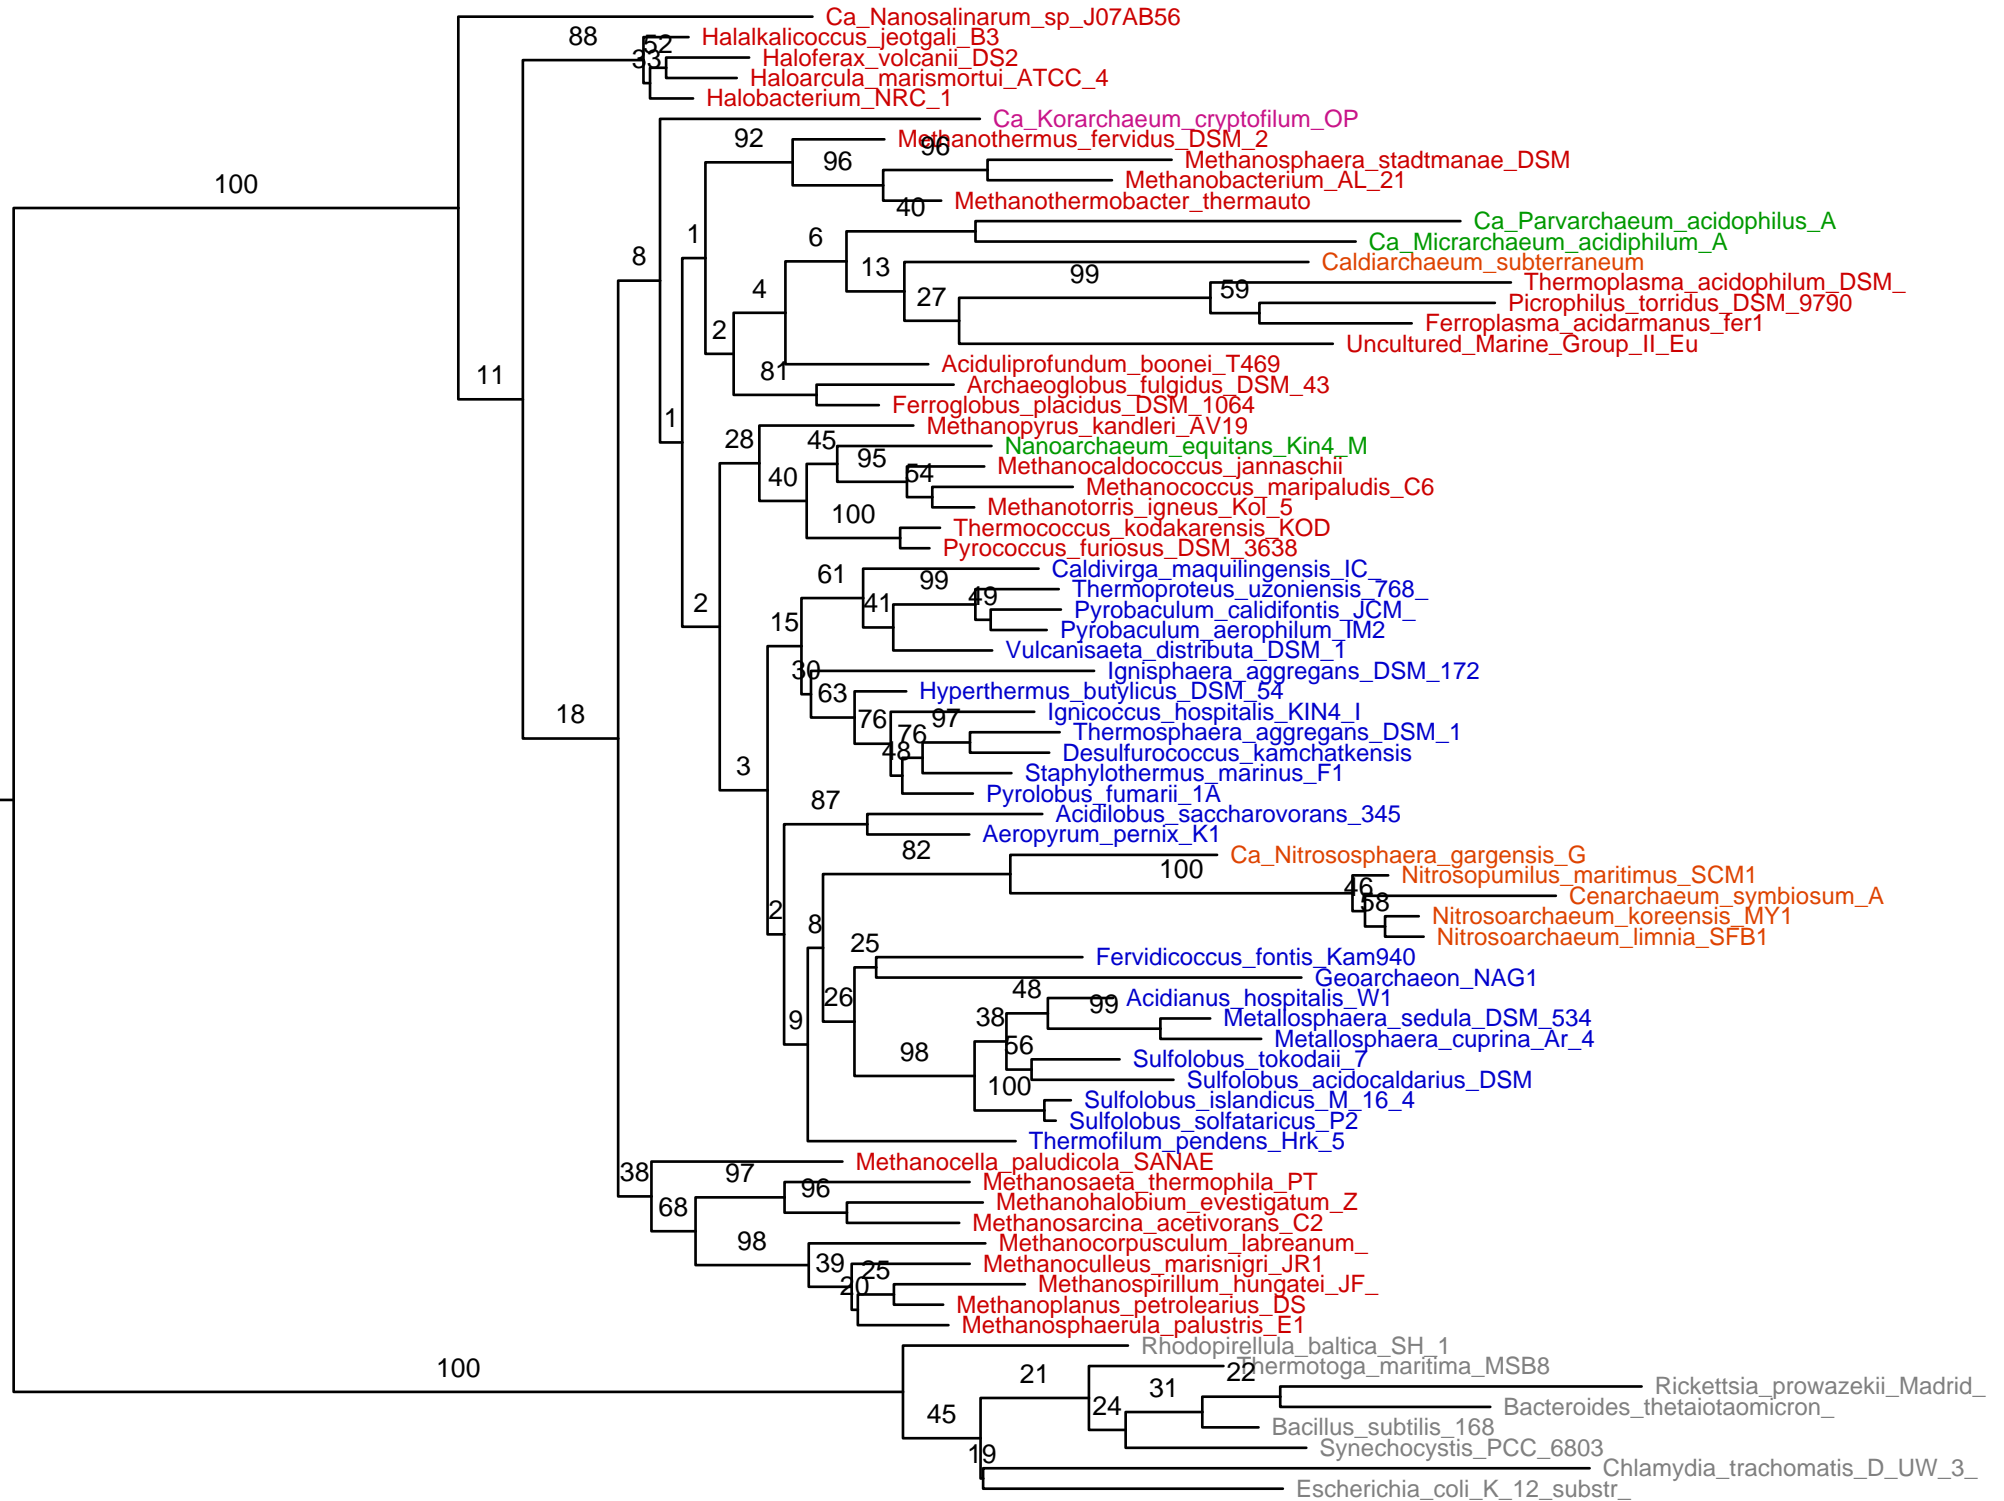

ML phylogeny of Ribosomal protein L18 (arCOG04088)

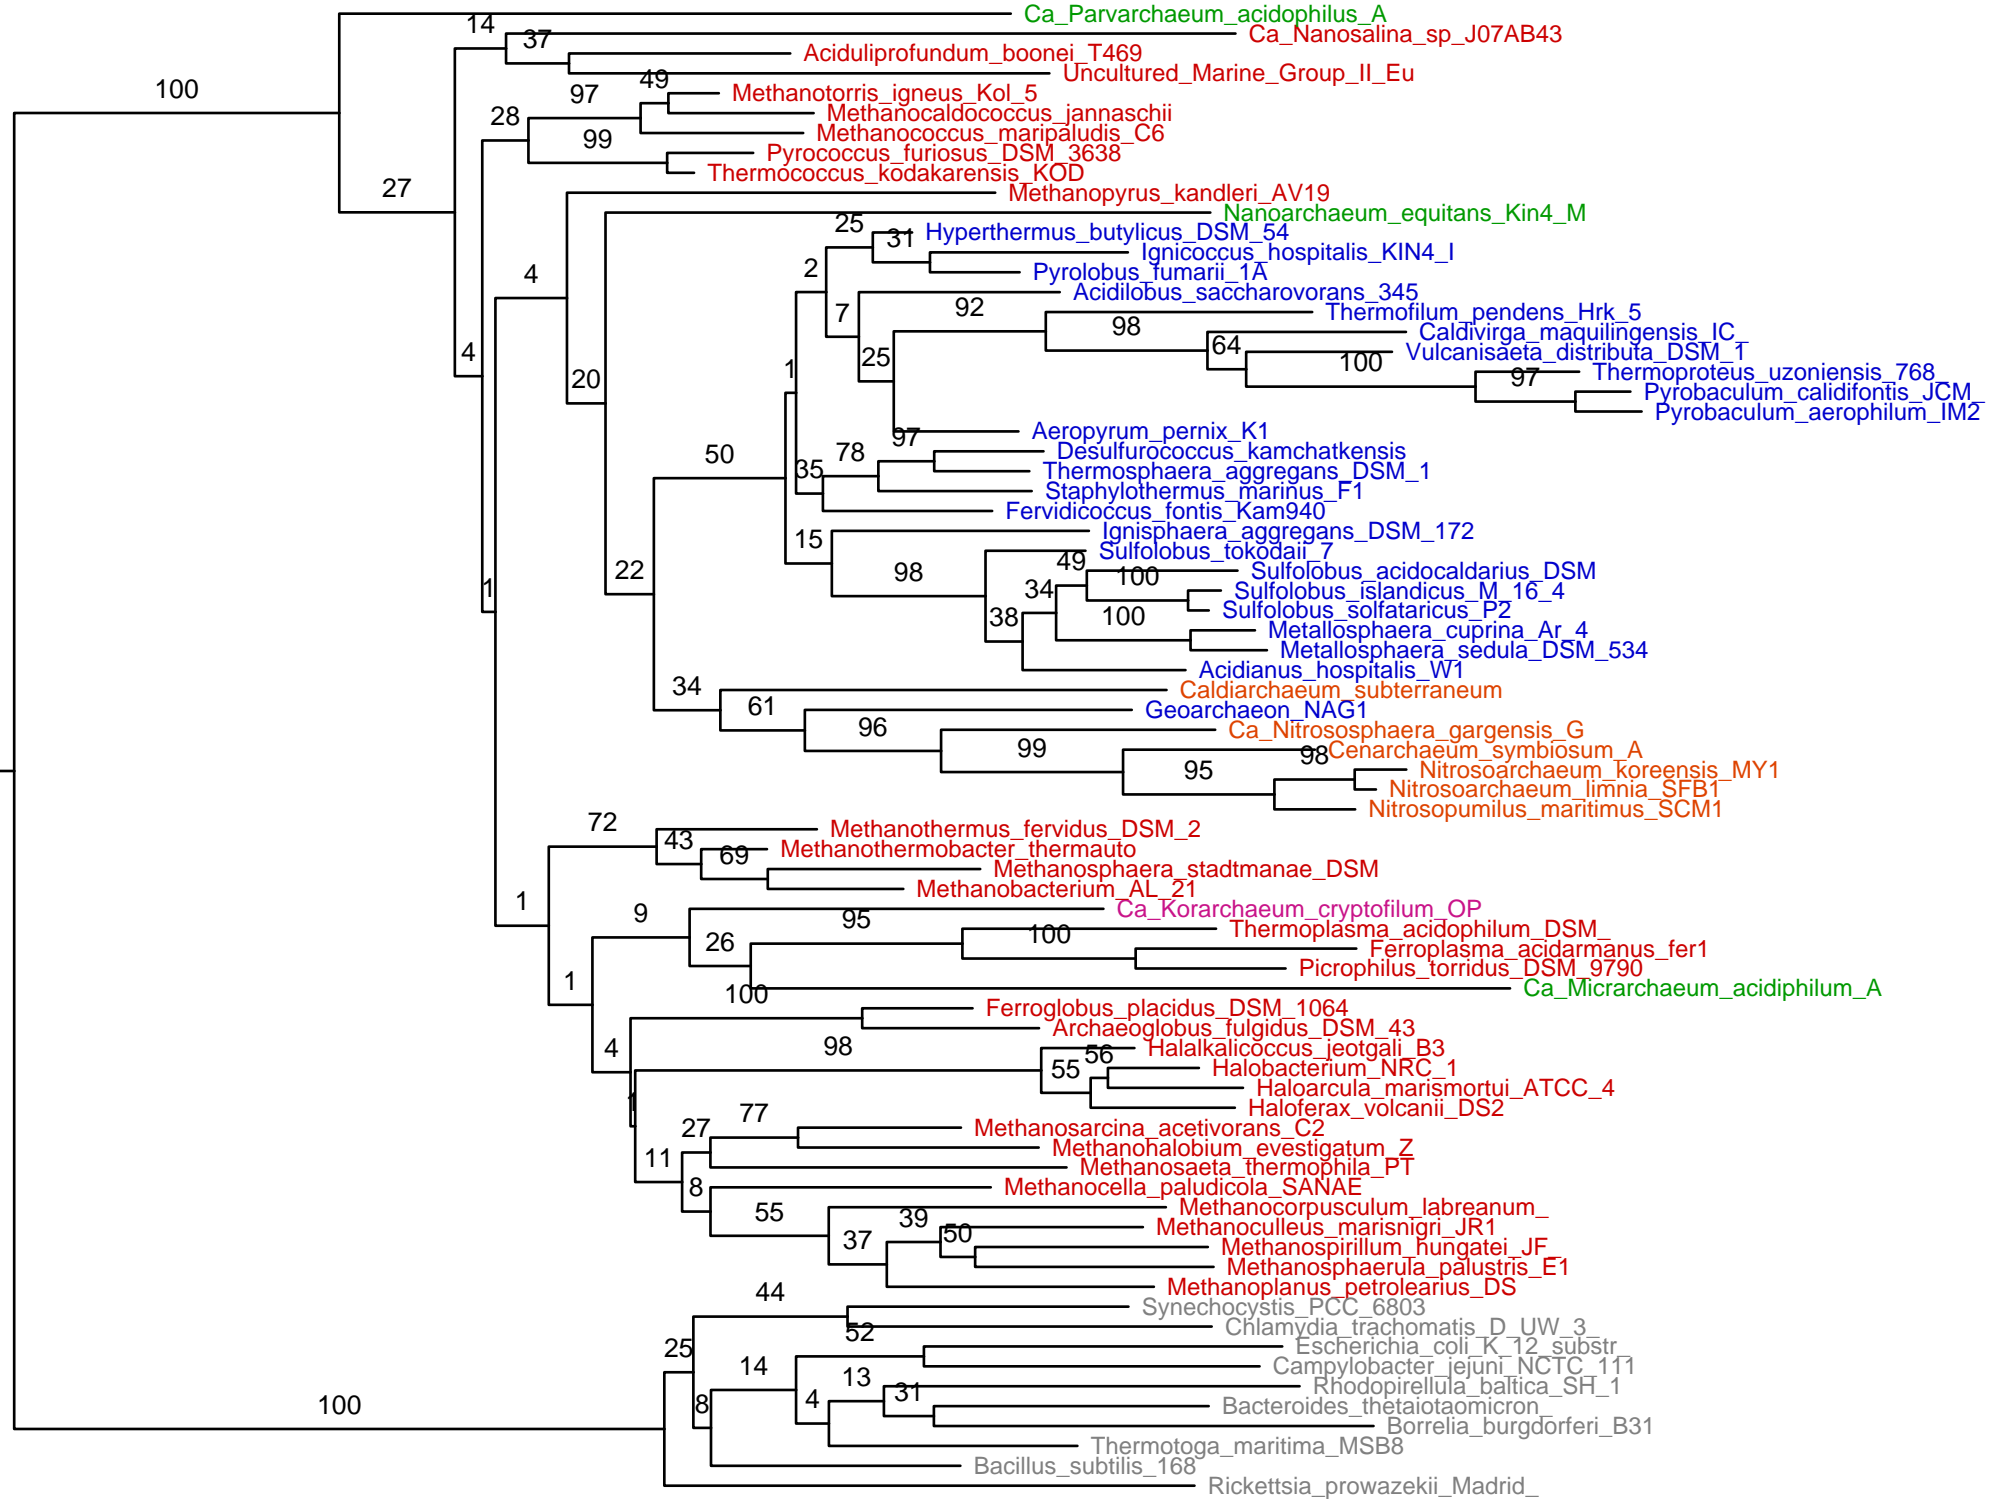

ML phylogeny of Ribosomal protein L6P (arCOG04090)

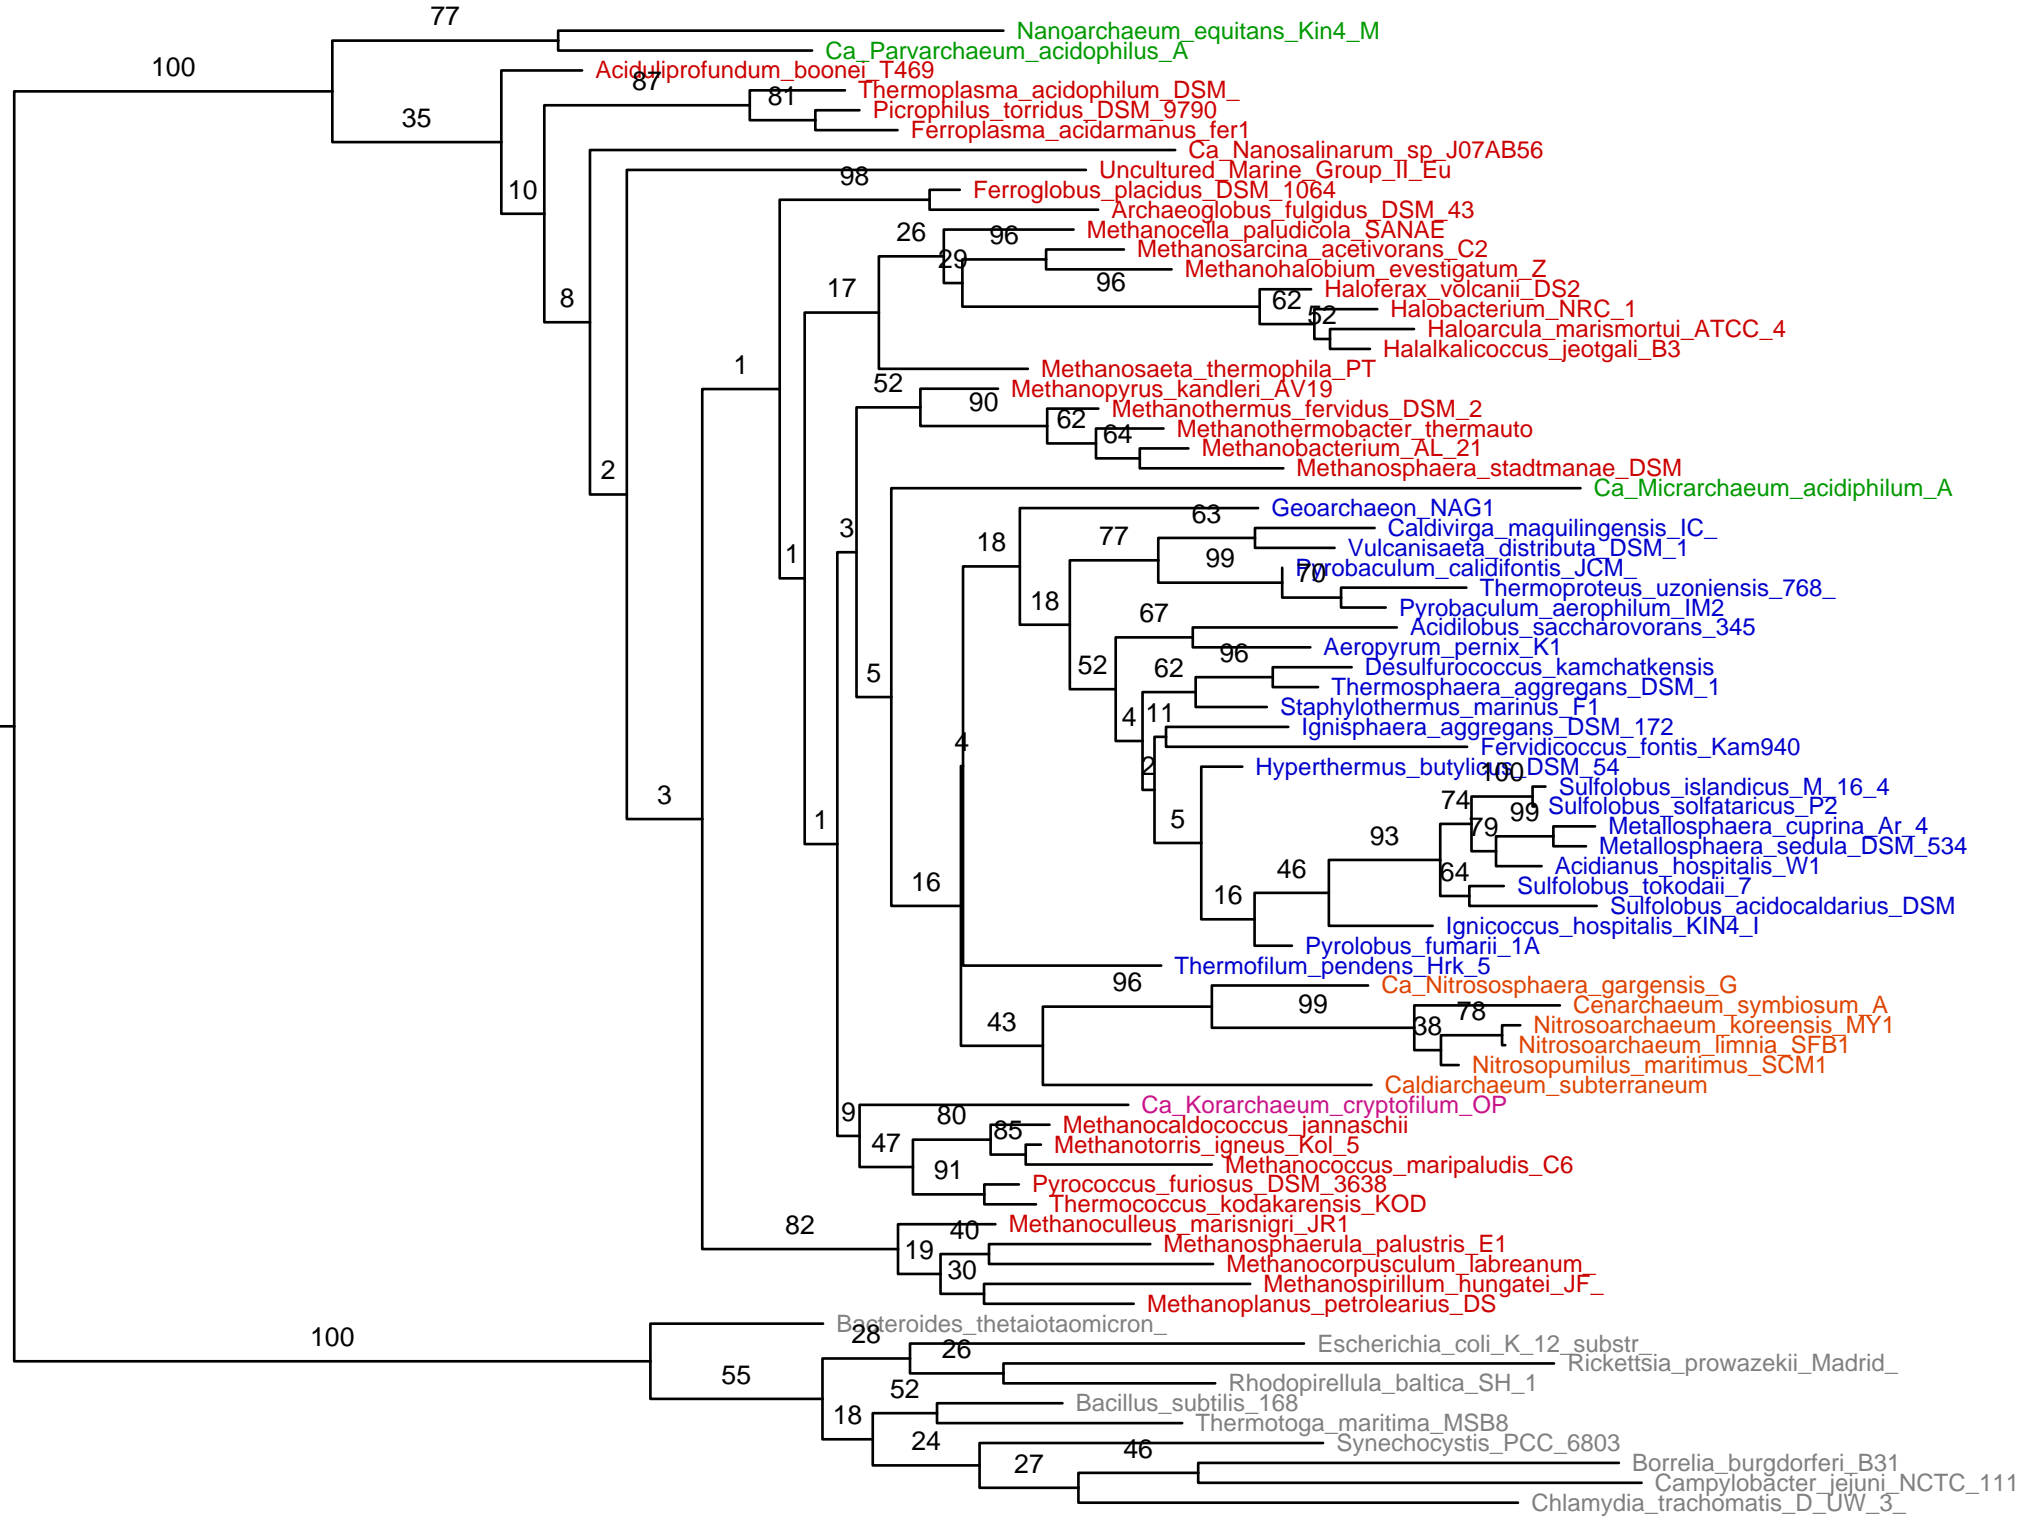

ML phylogeny of Ribosomal protein S8 (arCOG04091)

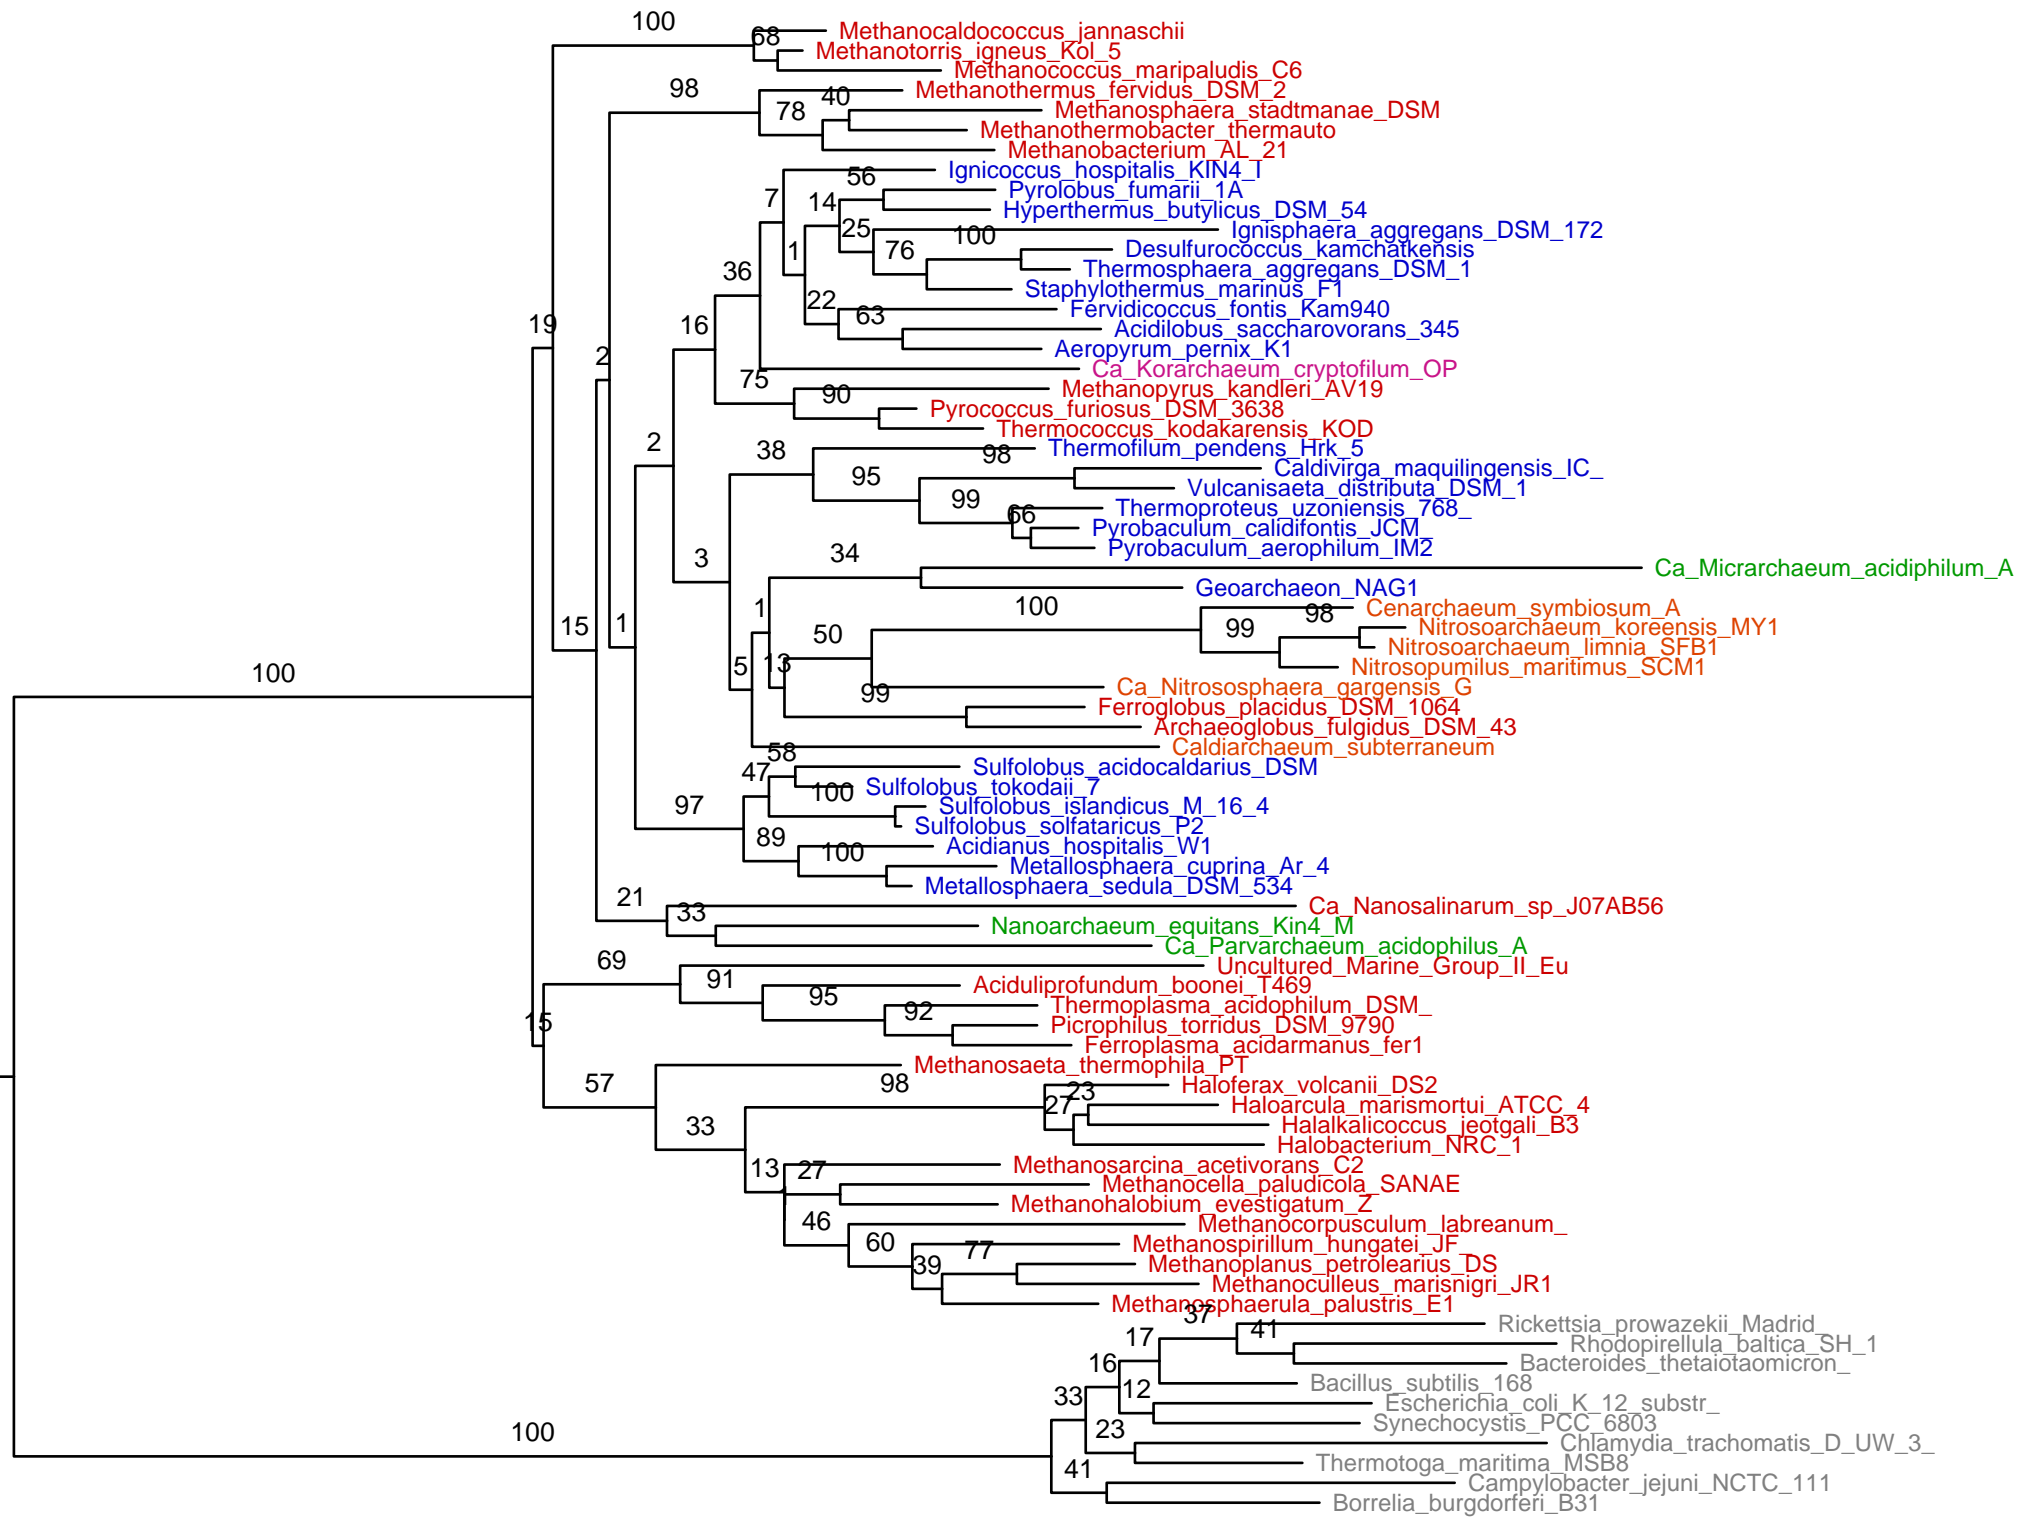

0.3  
ML phylogeny of Ribosomal protein L5 (arCOG04092)

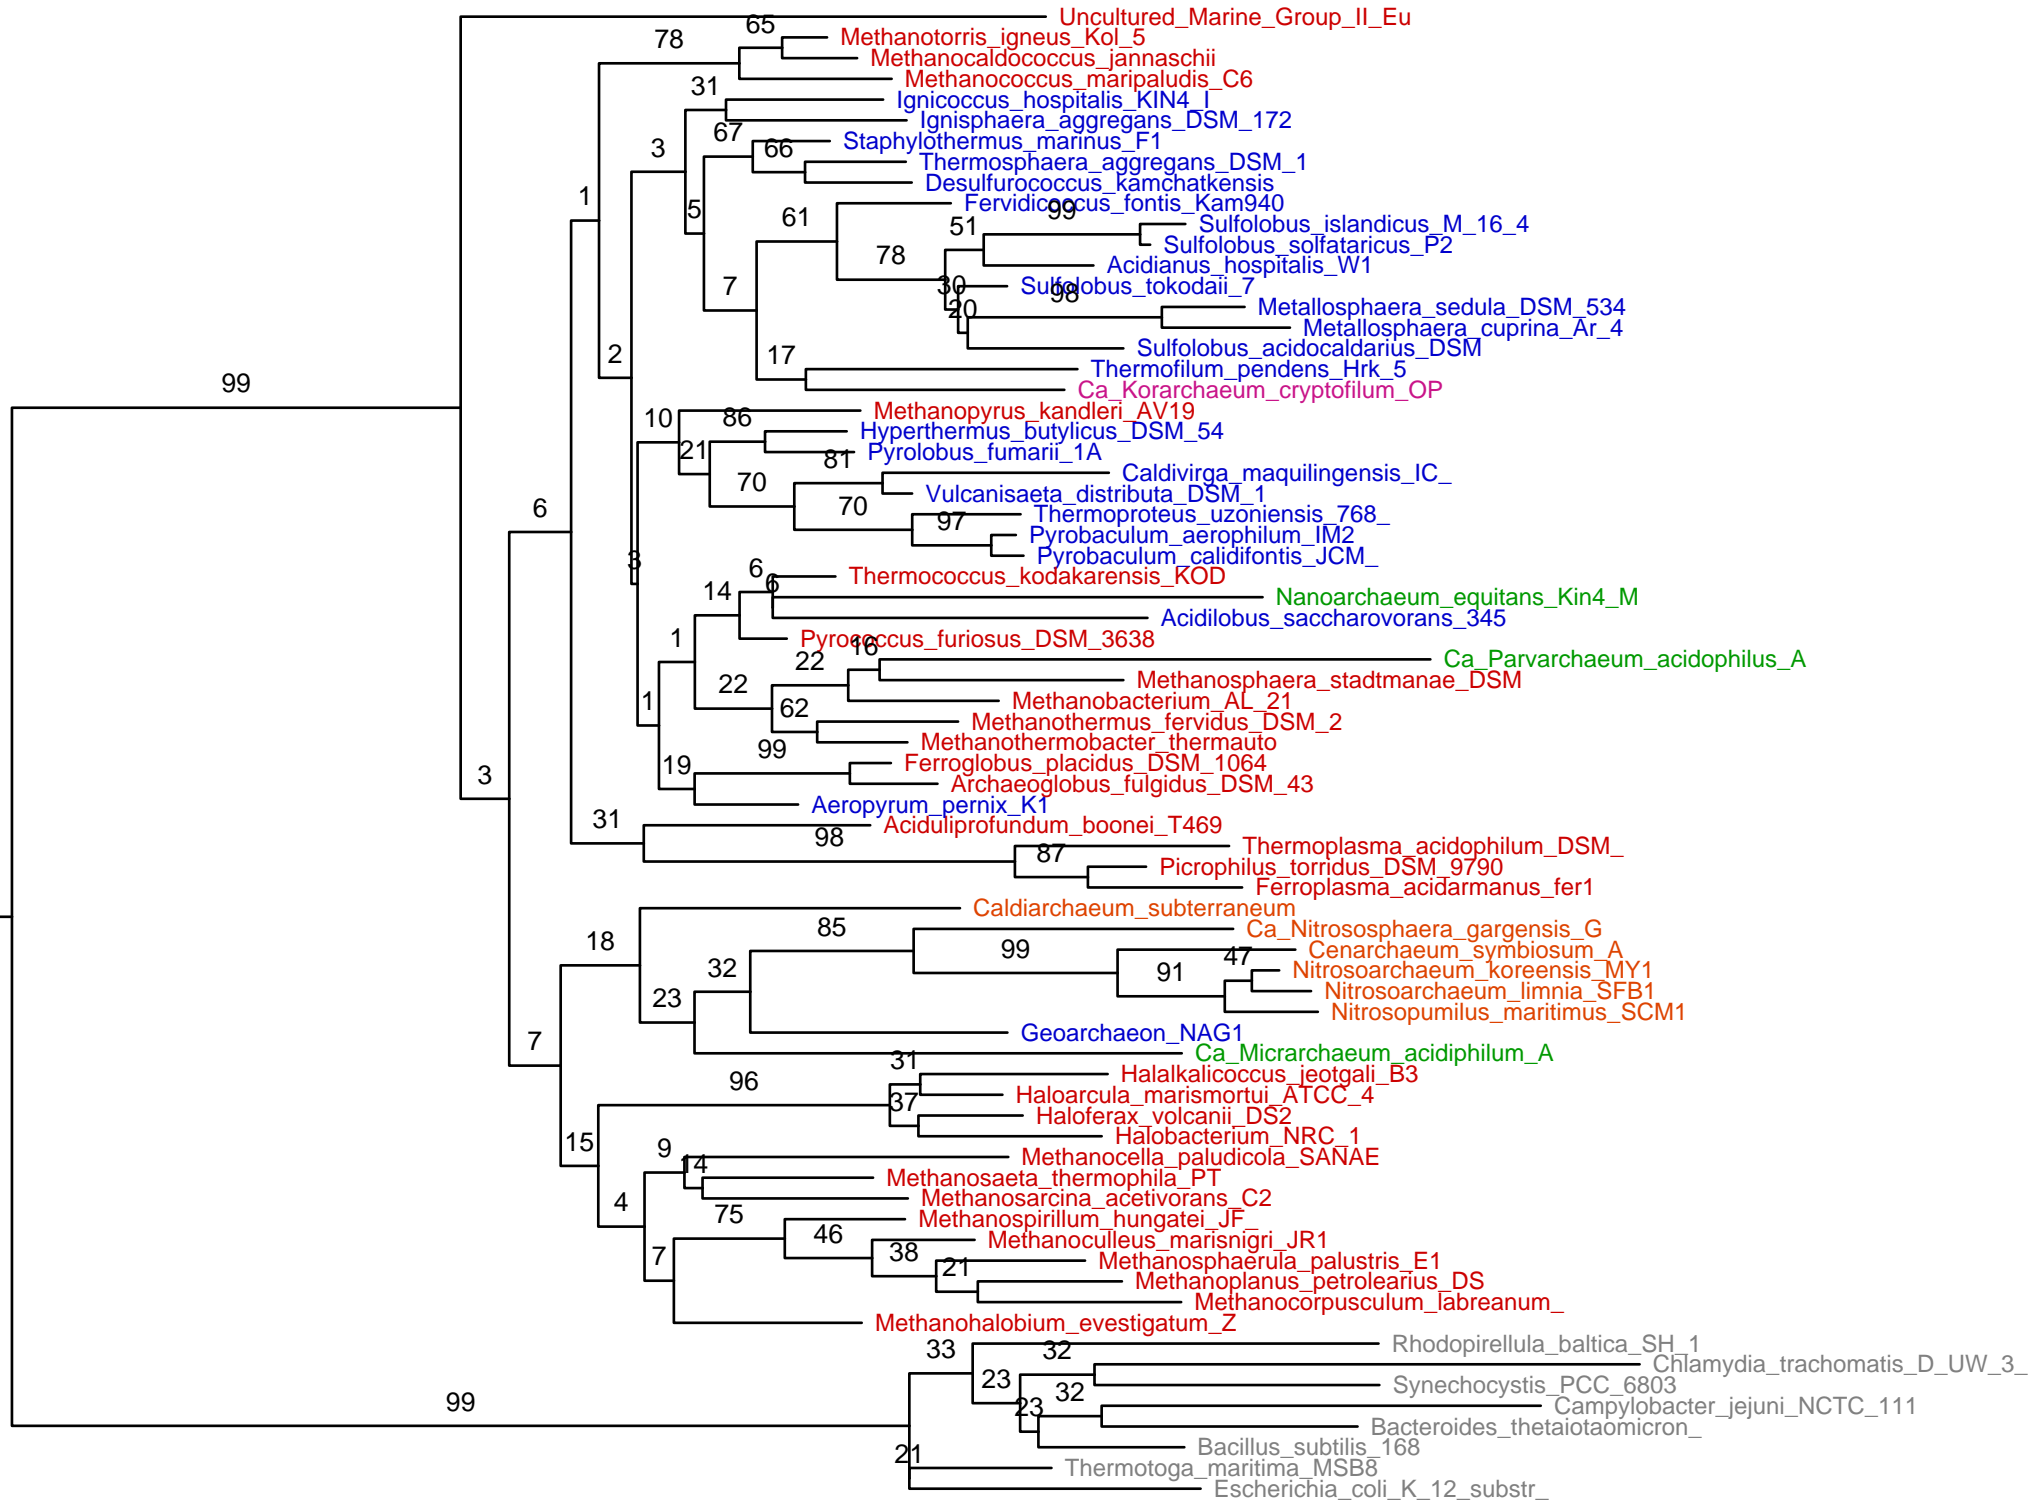

0.3

ML phylogeny of Ribosomal protein L24 (arCOG04094)



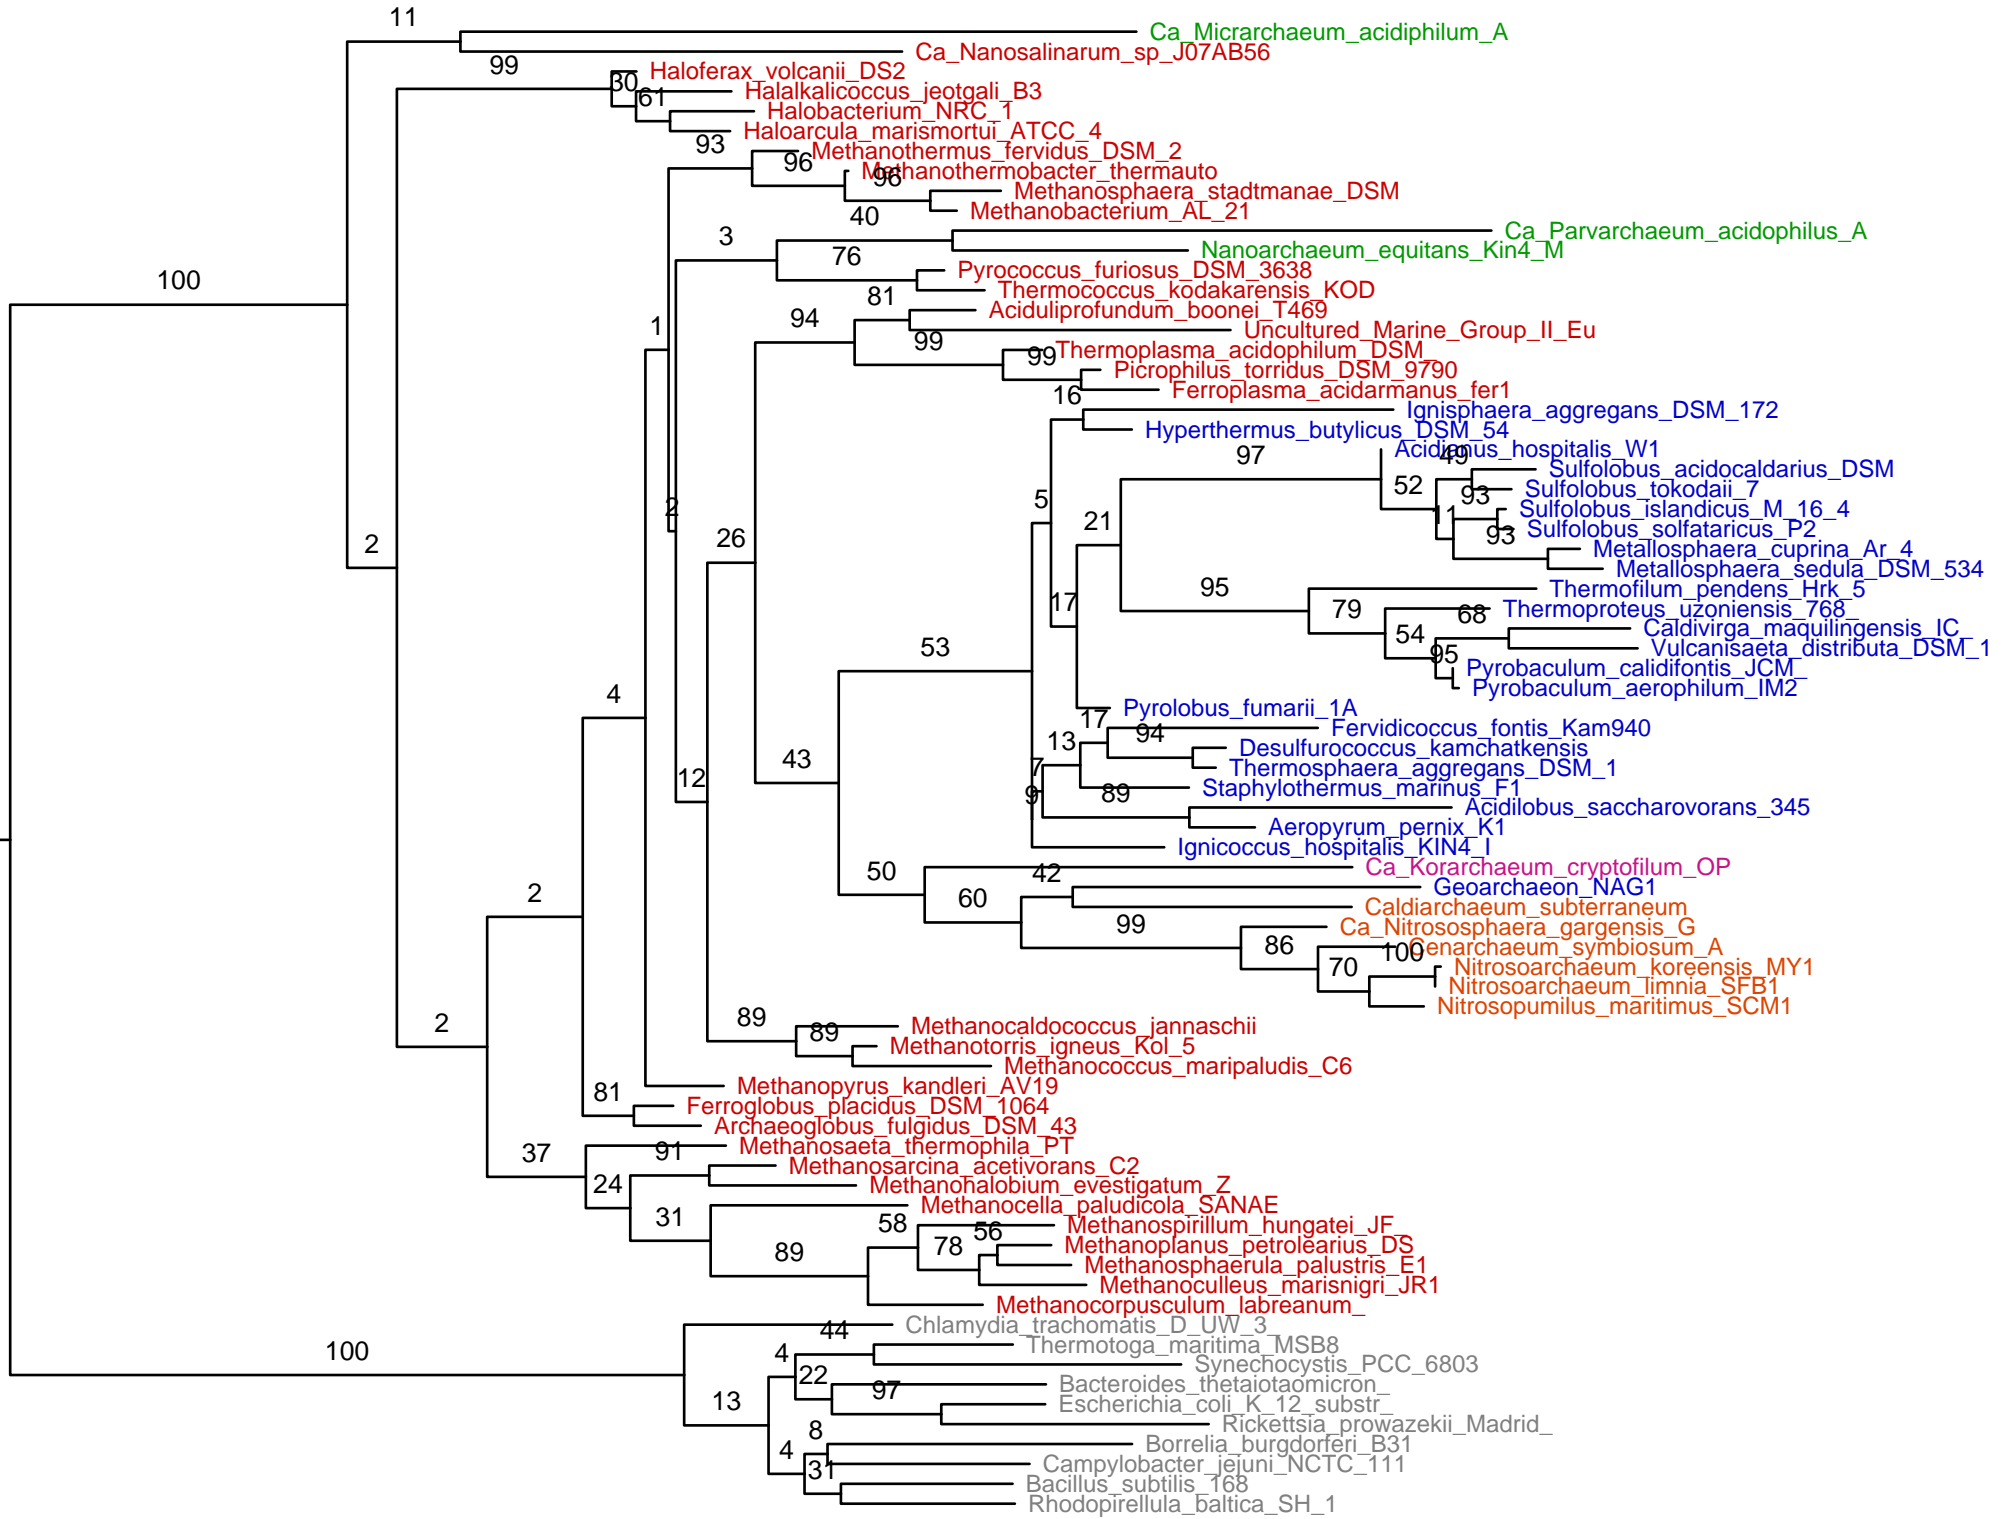

ML phylogeny of Ribosomal protein L14 (arCOG04095)

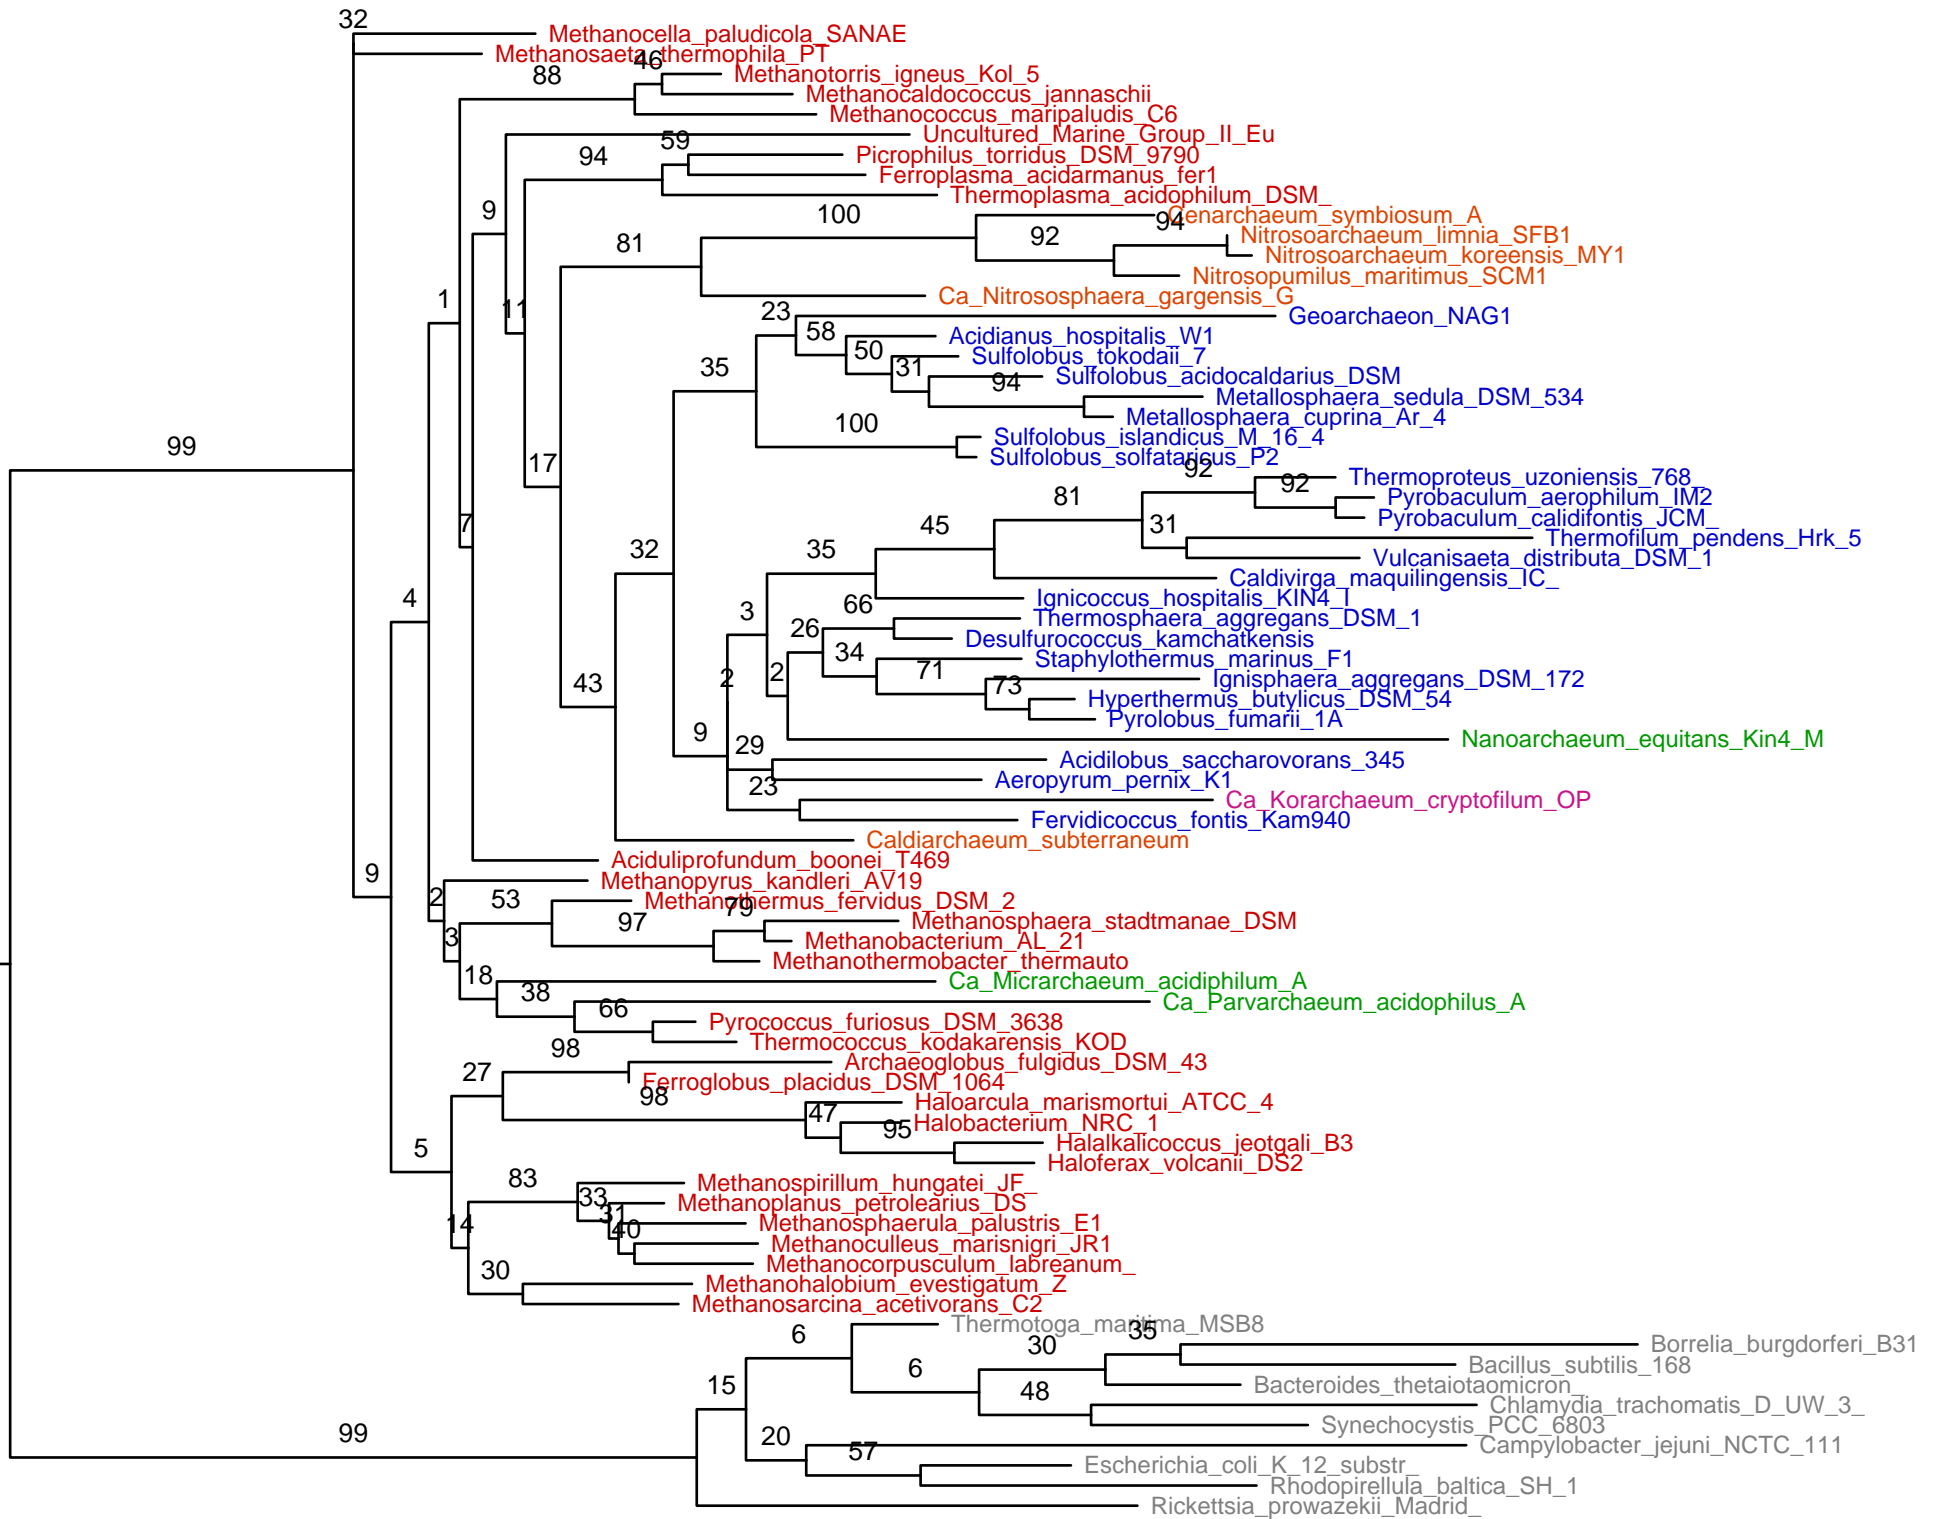

0.3

ML phylogeny of Ribosomal protein S17 (arCOG04096)

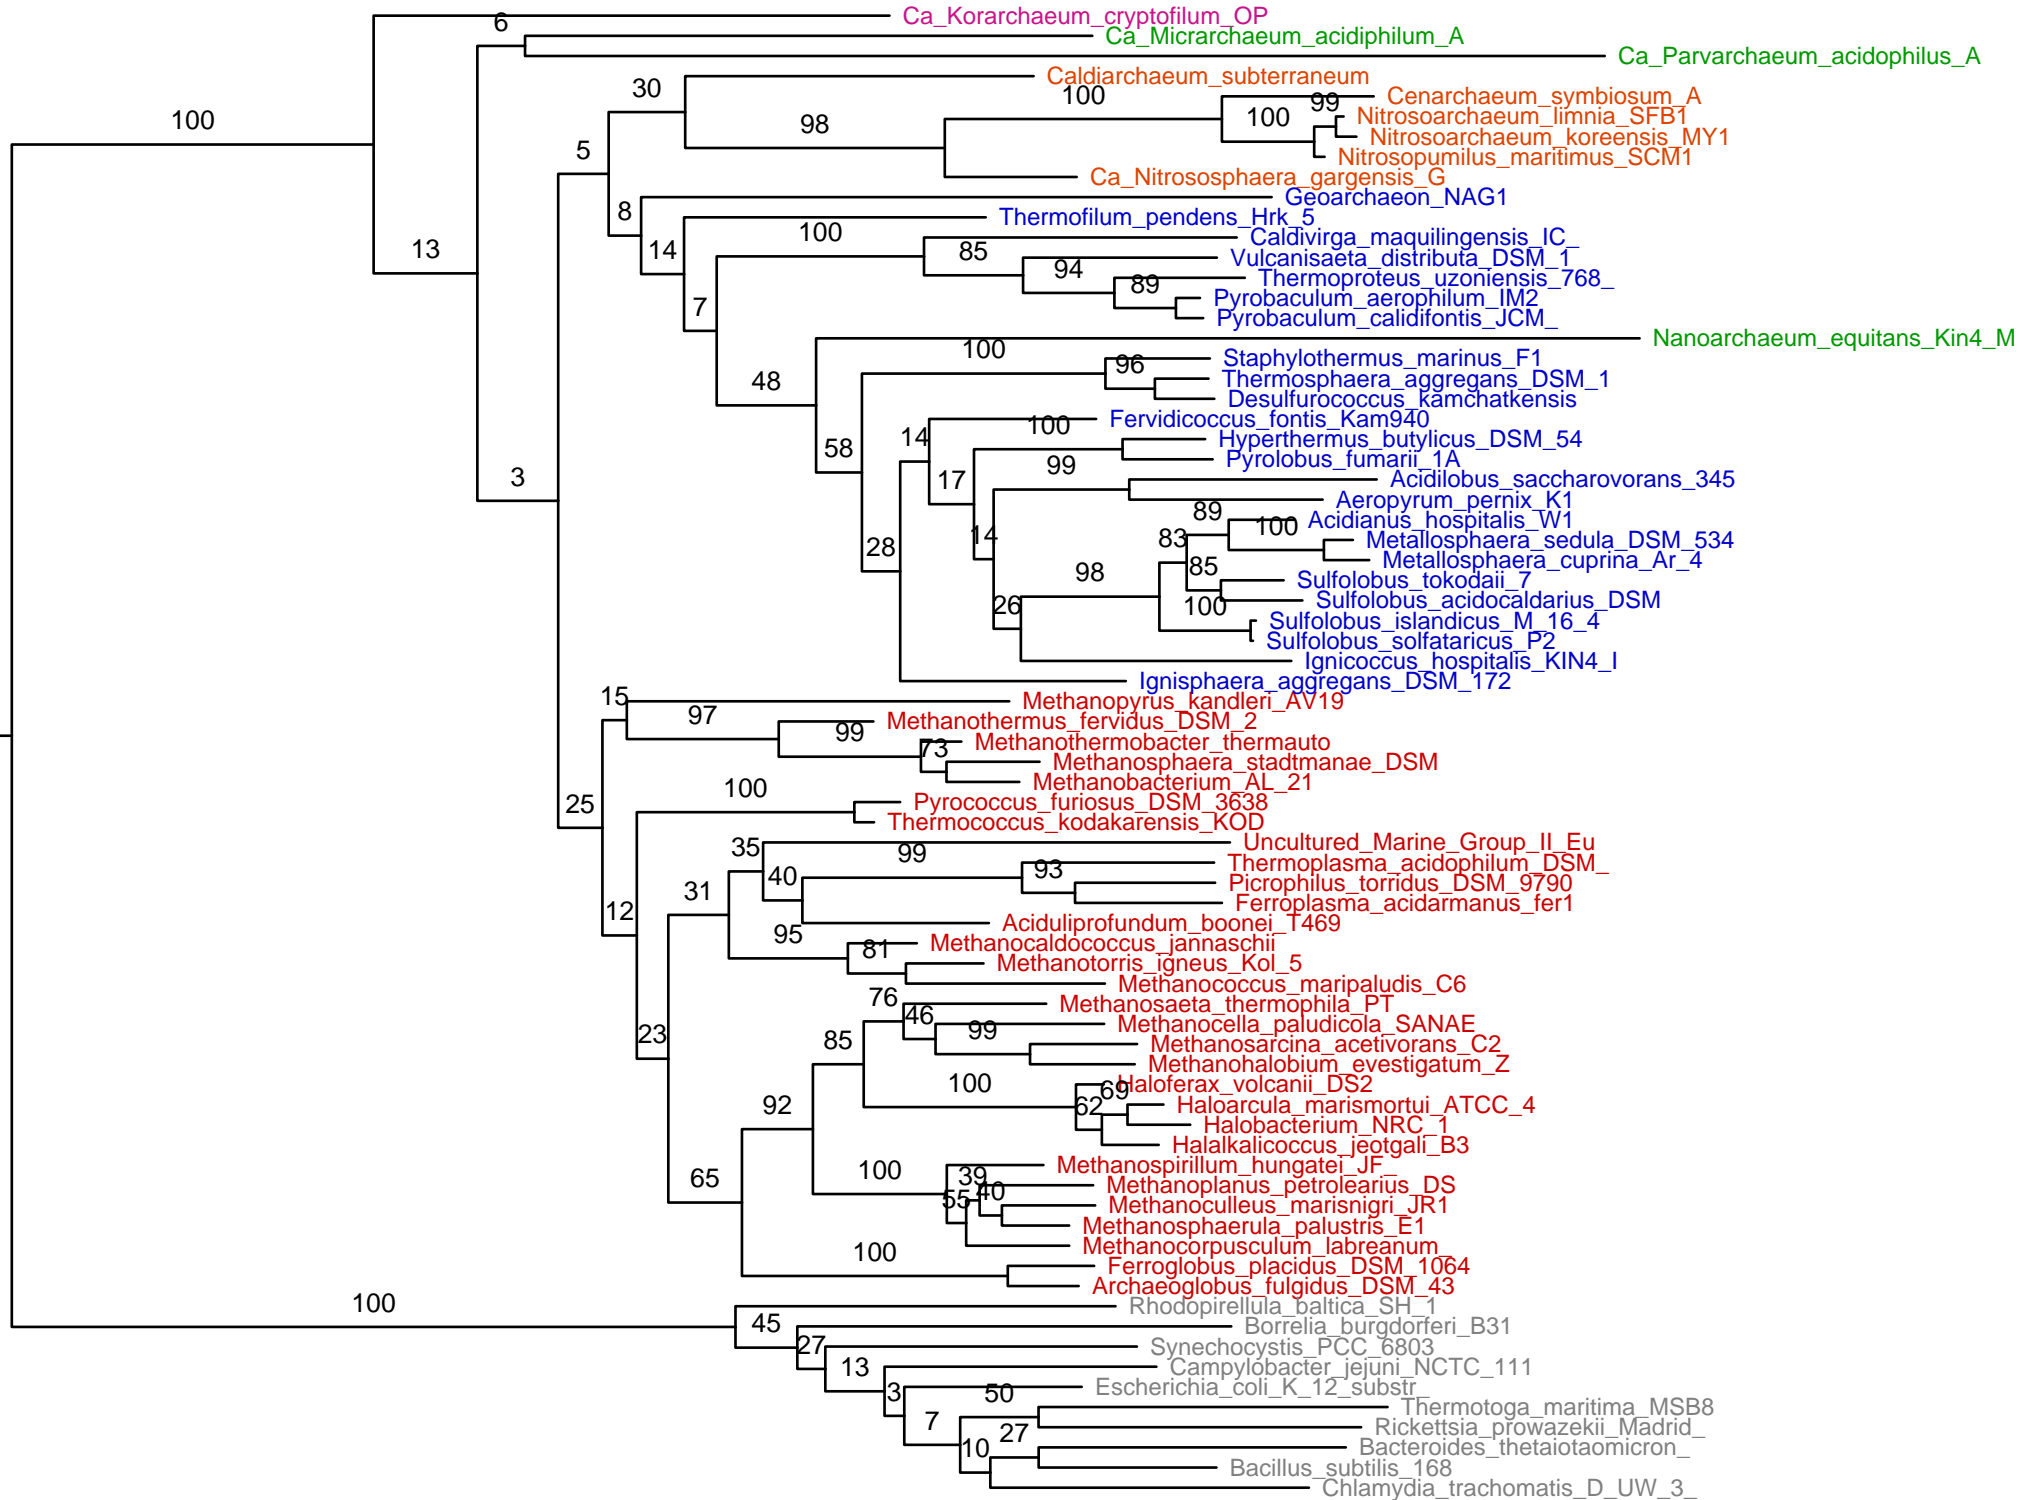

0.5

ML phylogeny of Ribosomal protein S3 (arCOG04097)

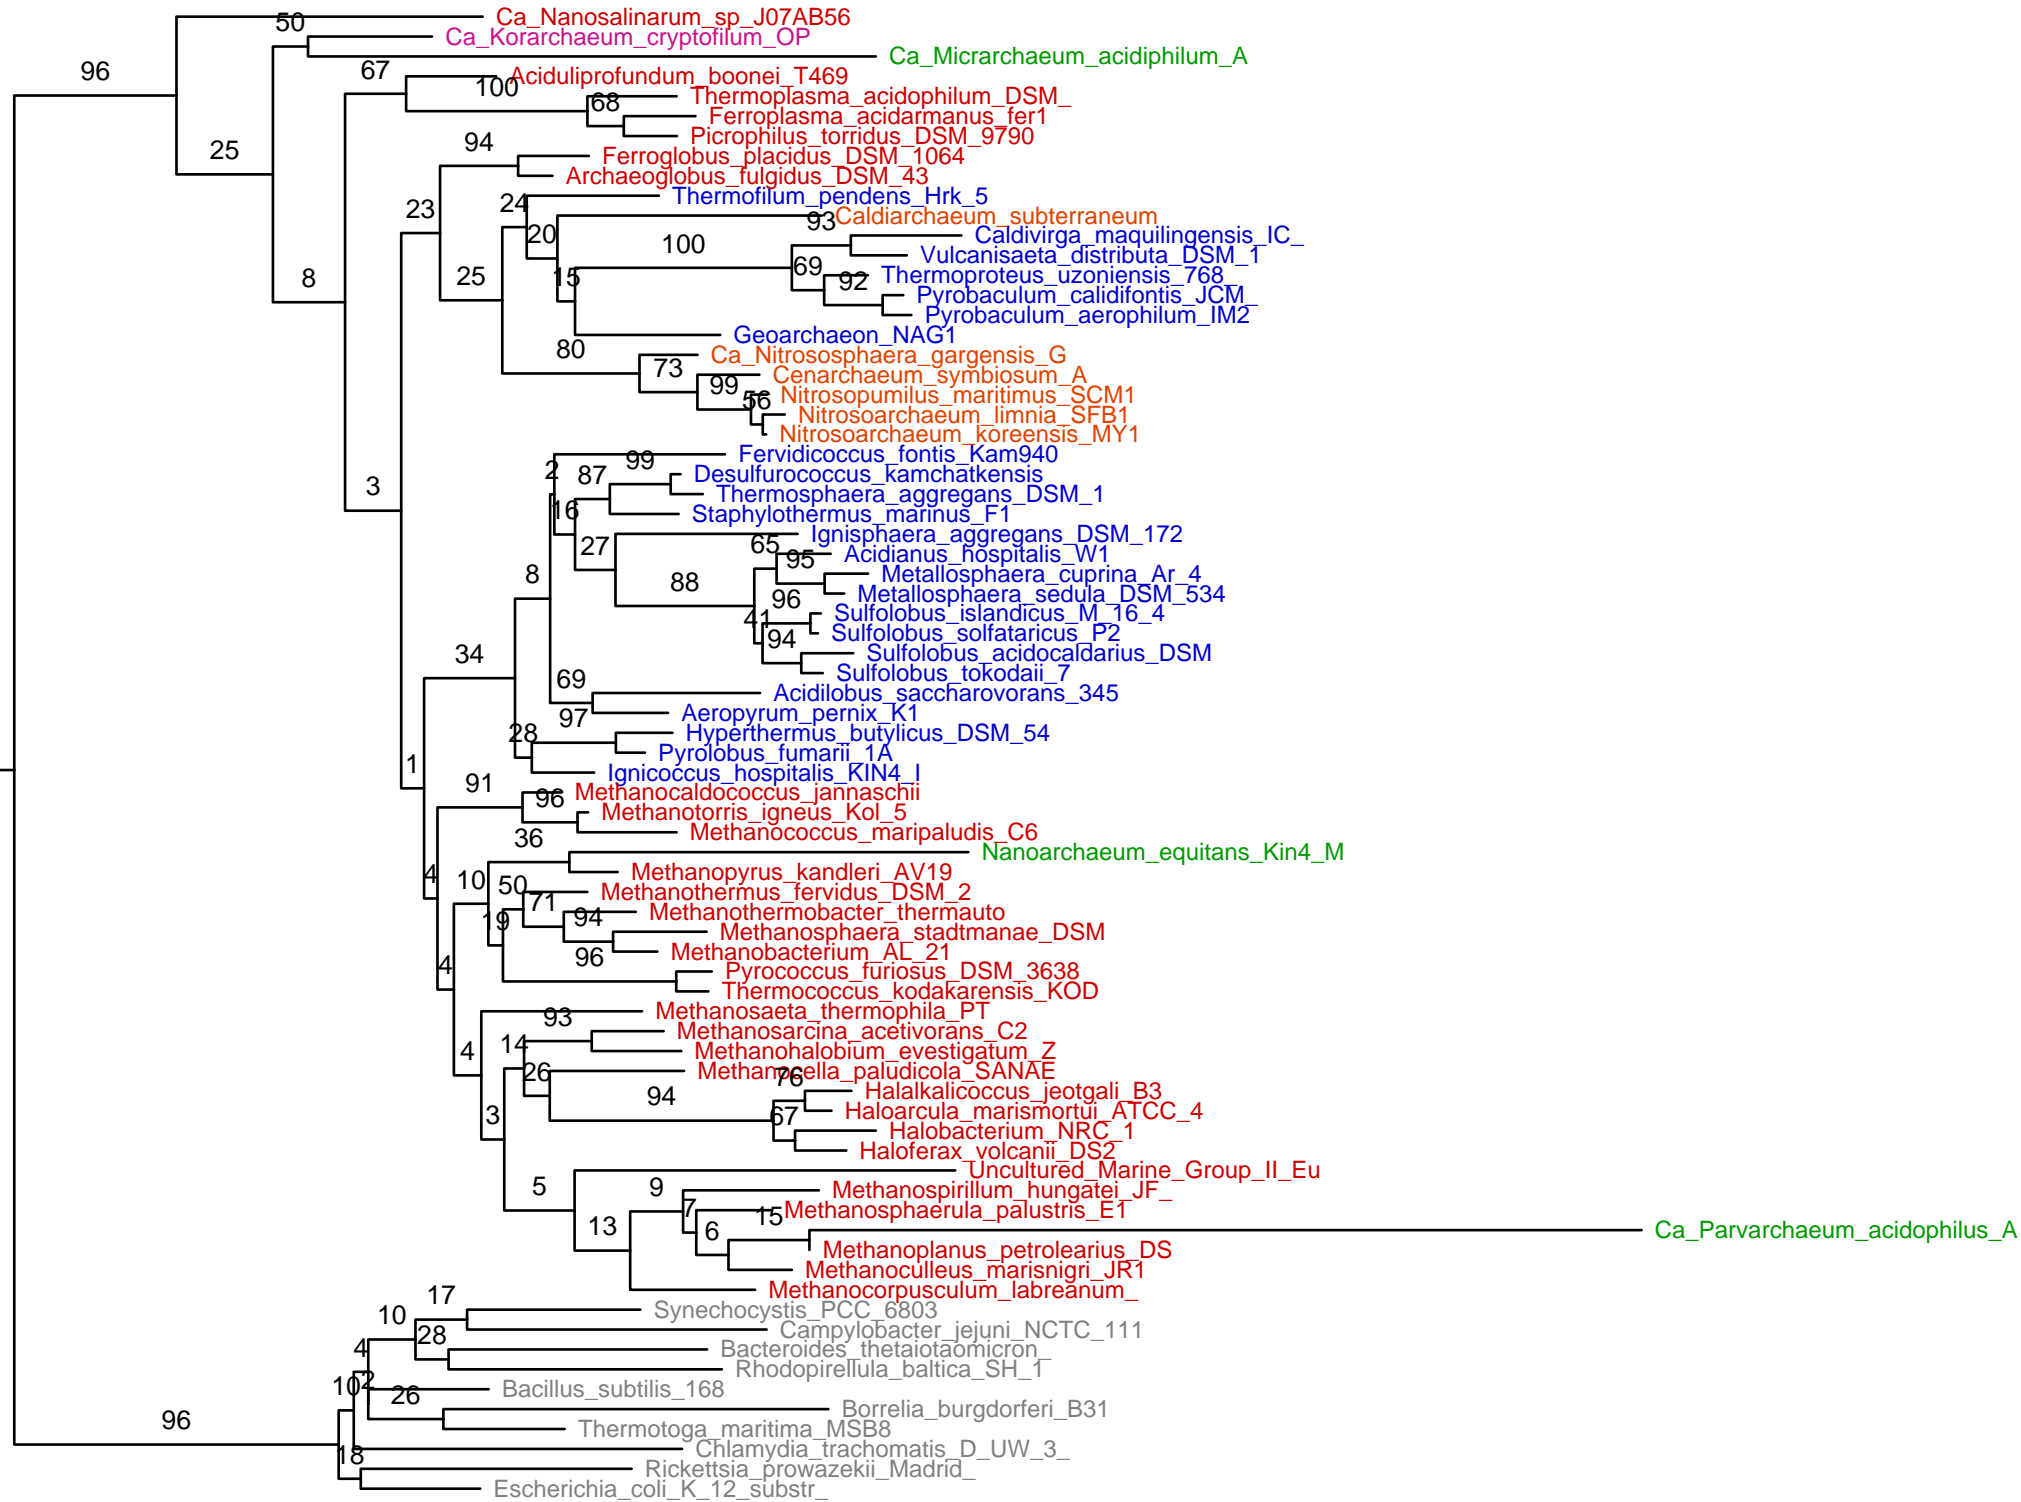

0.4

ML phylogeny of Ribosomal protein L22 (arCOG04098)

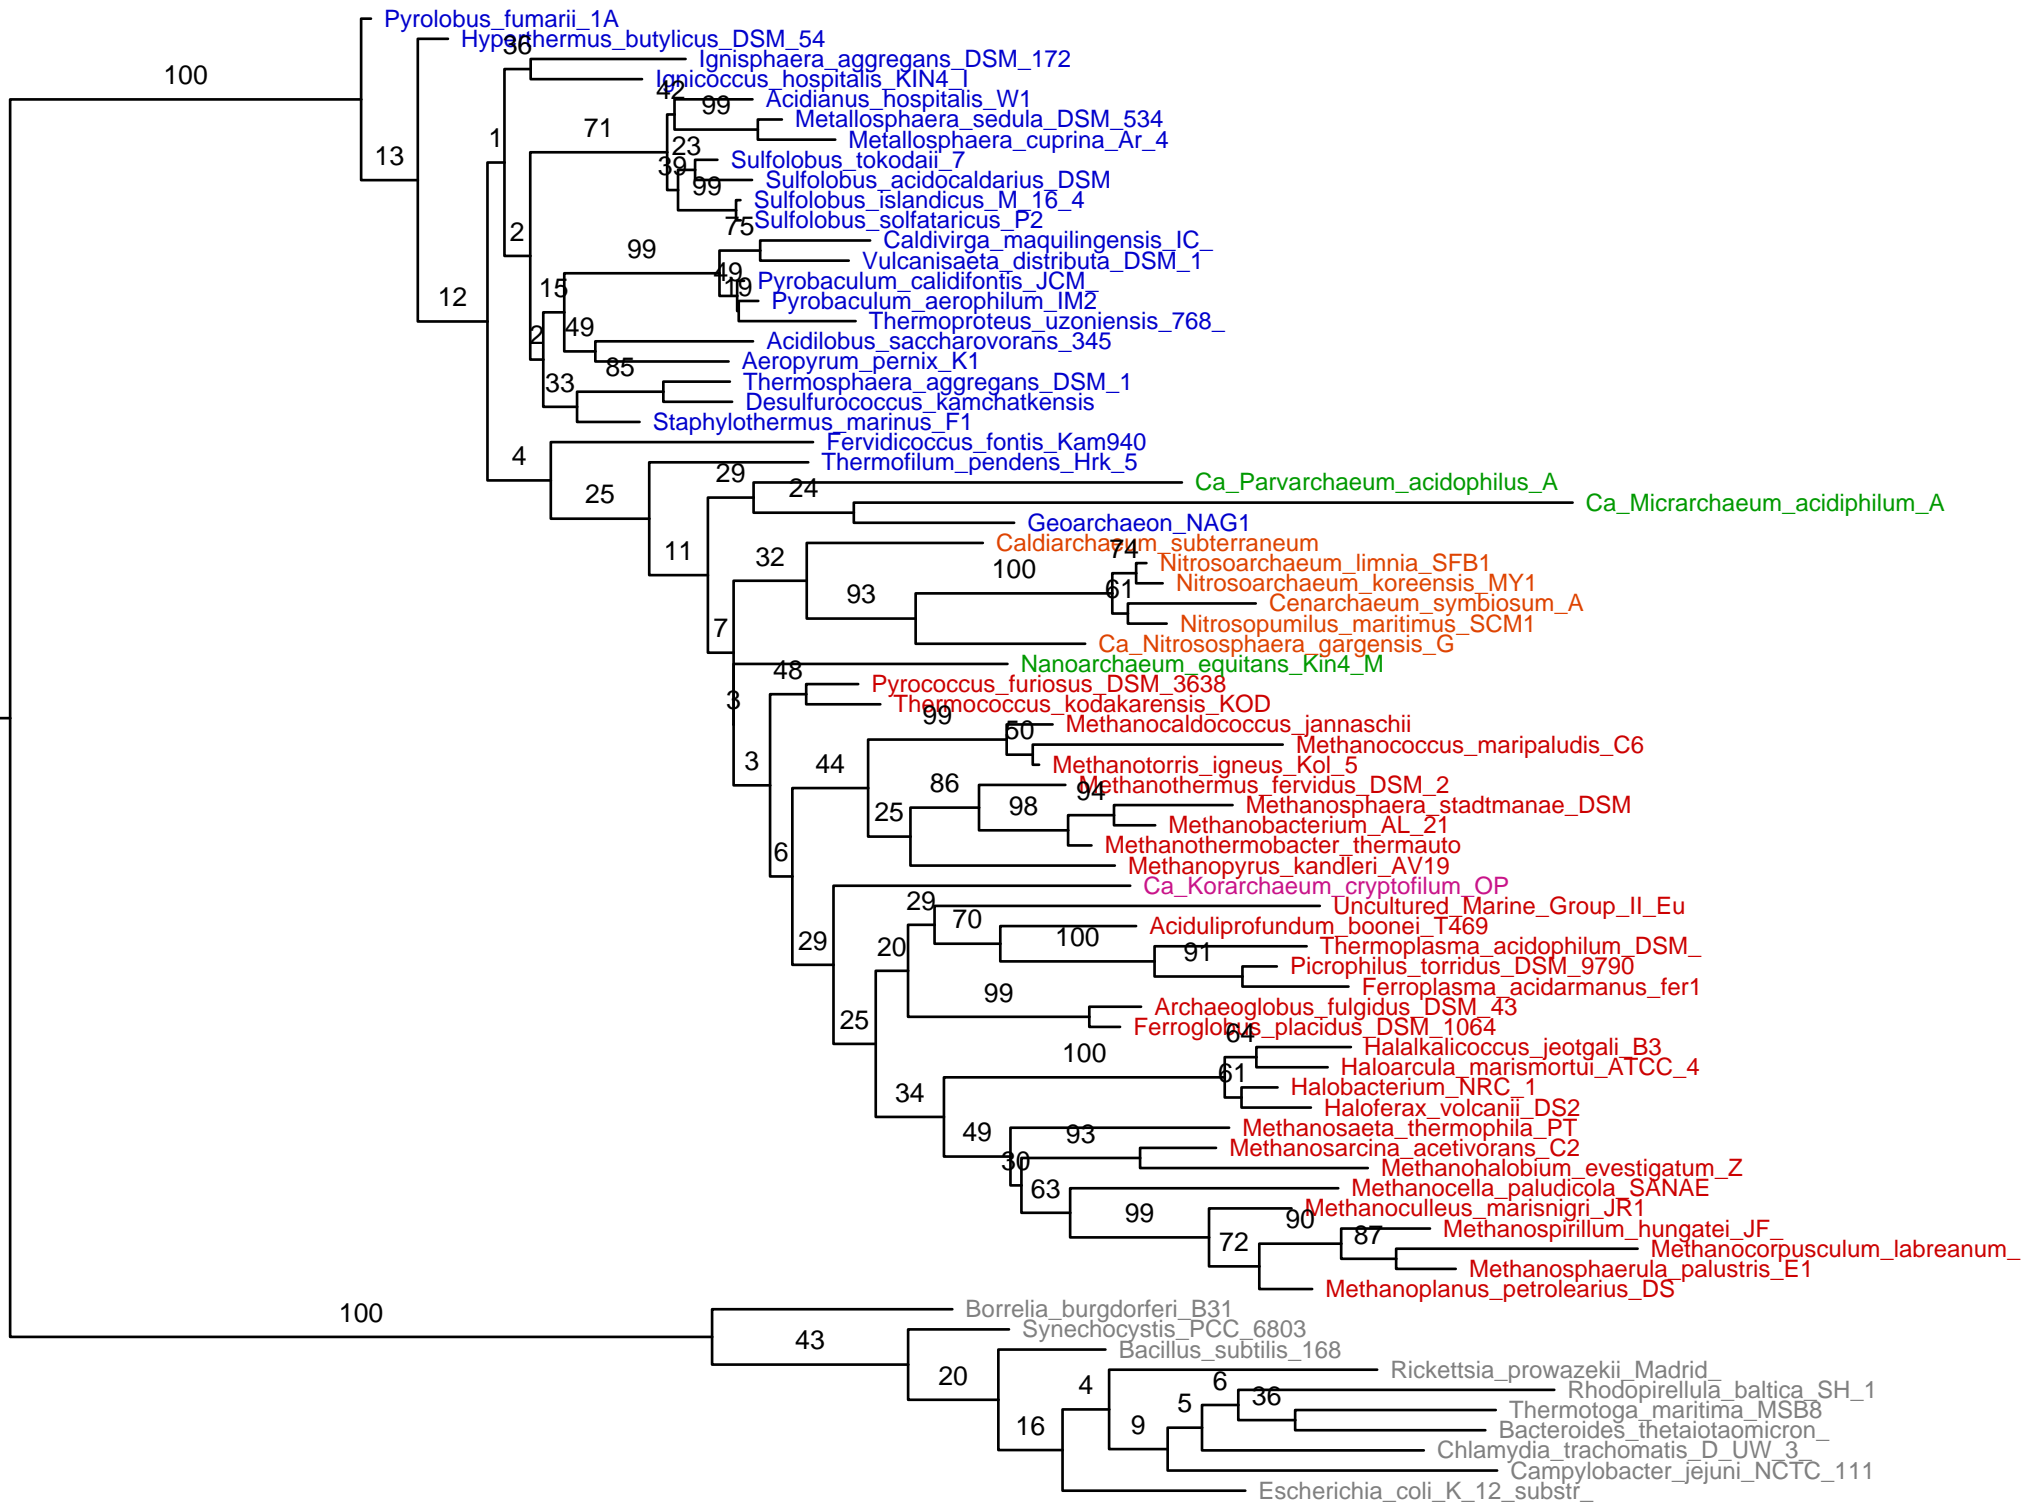

0.4

ML phylogeny of Ribosomal protein S19 (arCOG04099)

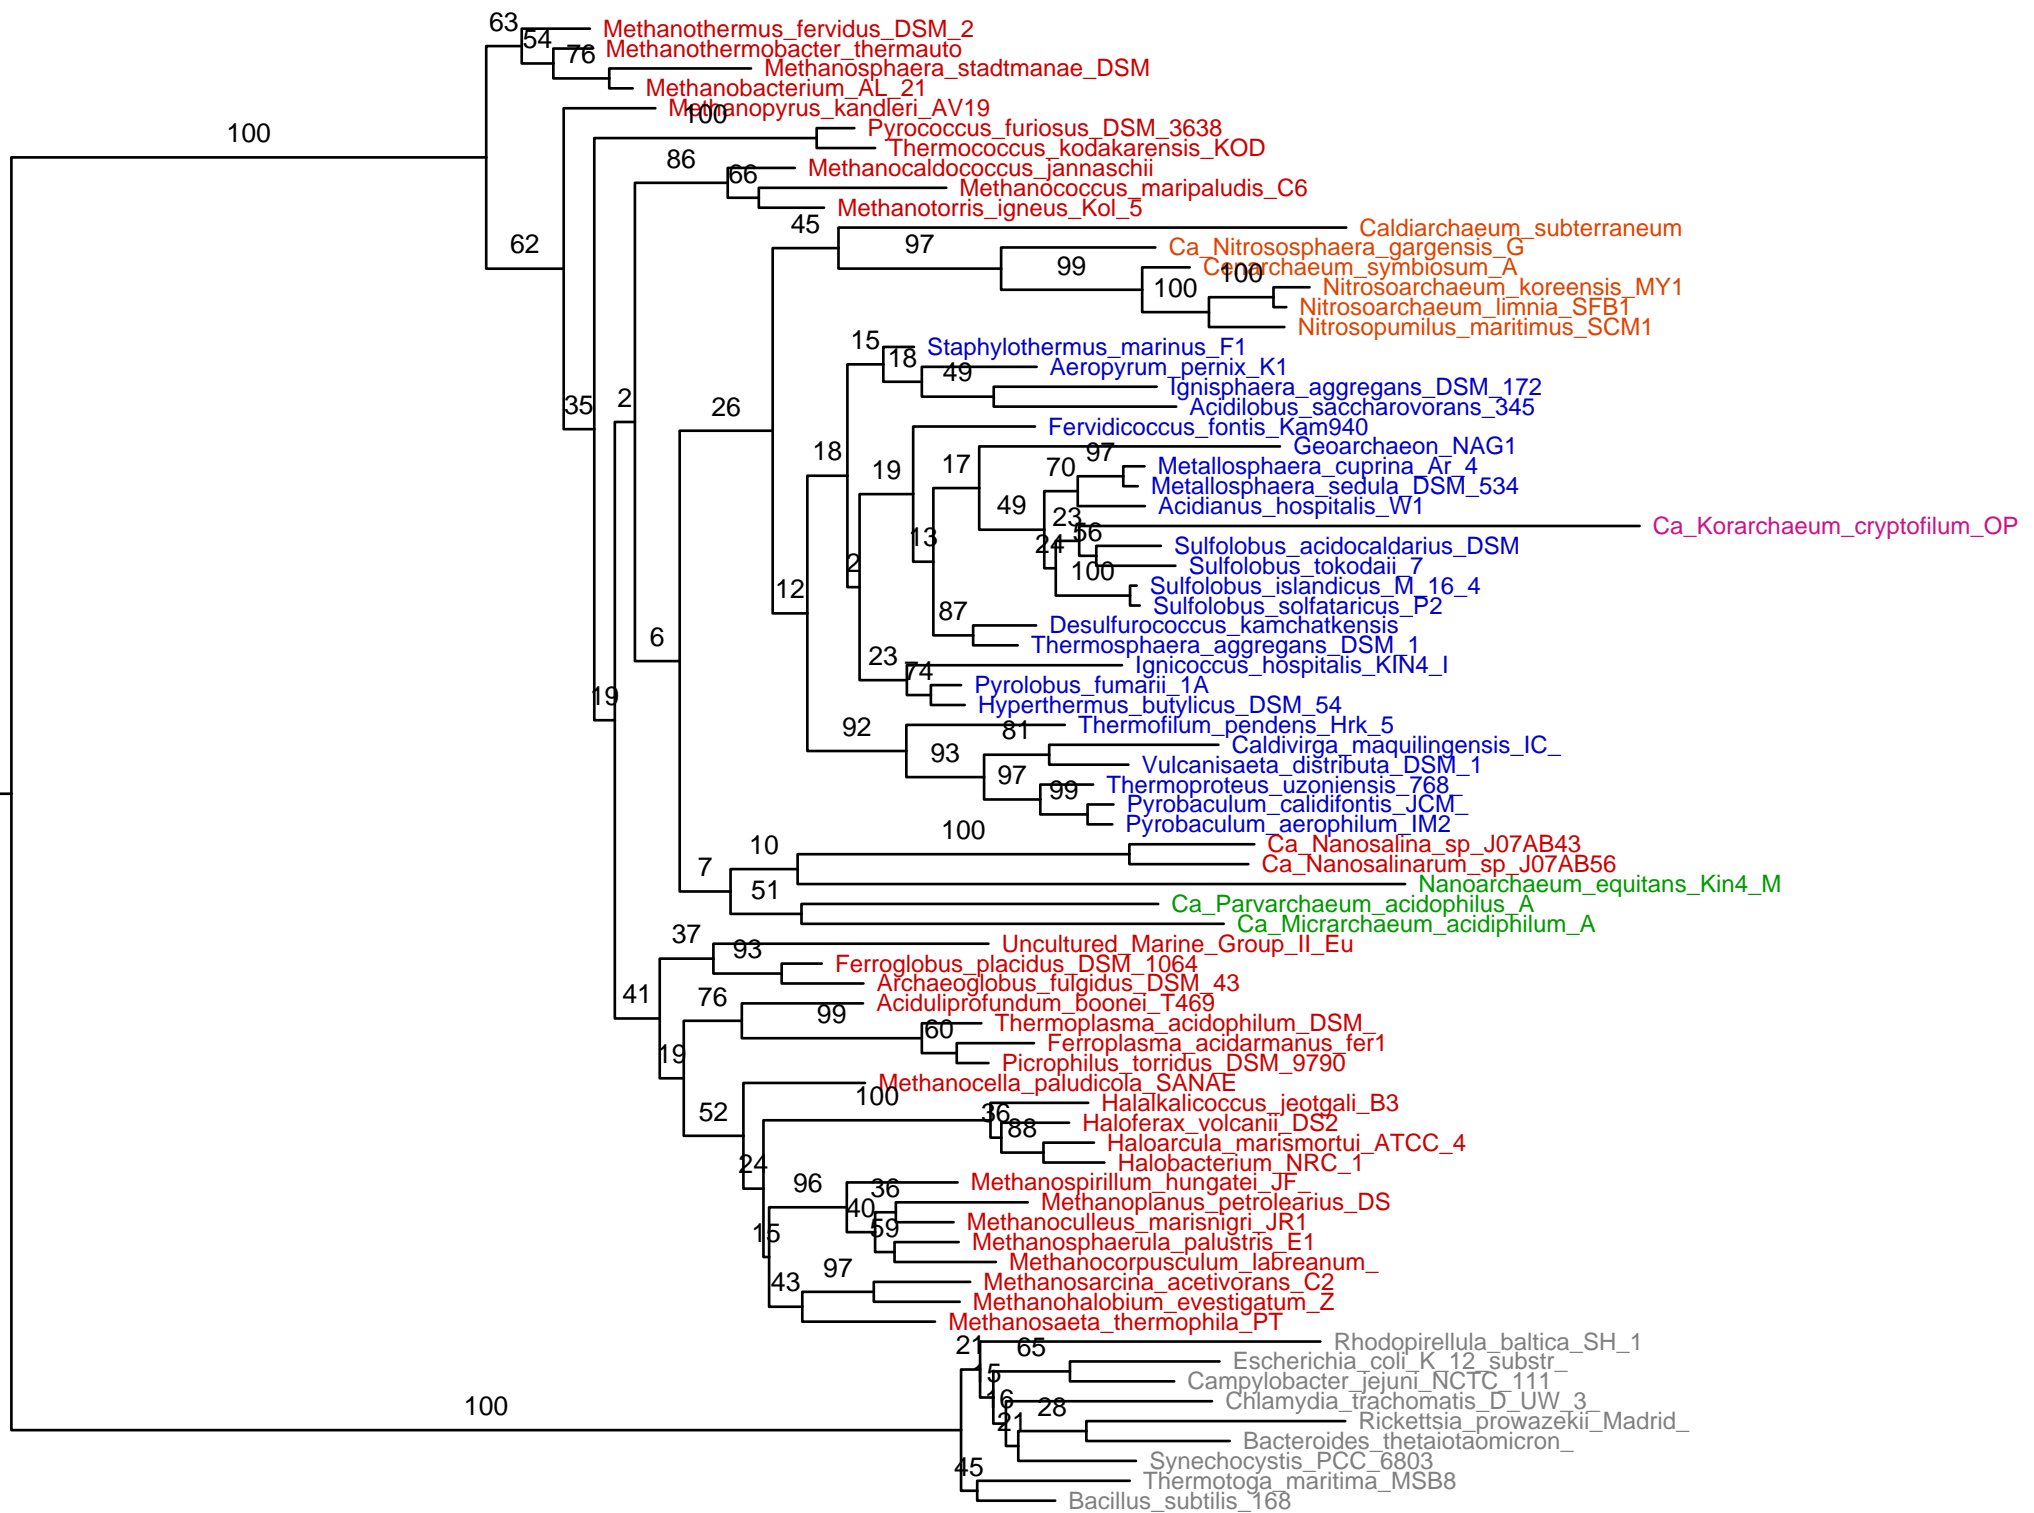

0.4

ML phylogeny of Ribosomal protein L10AE/L16 (arCOG04113)

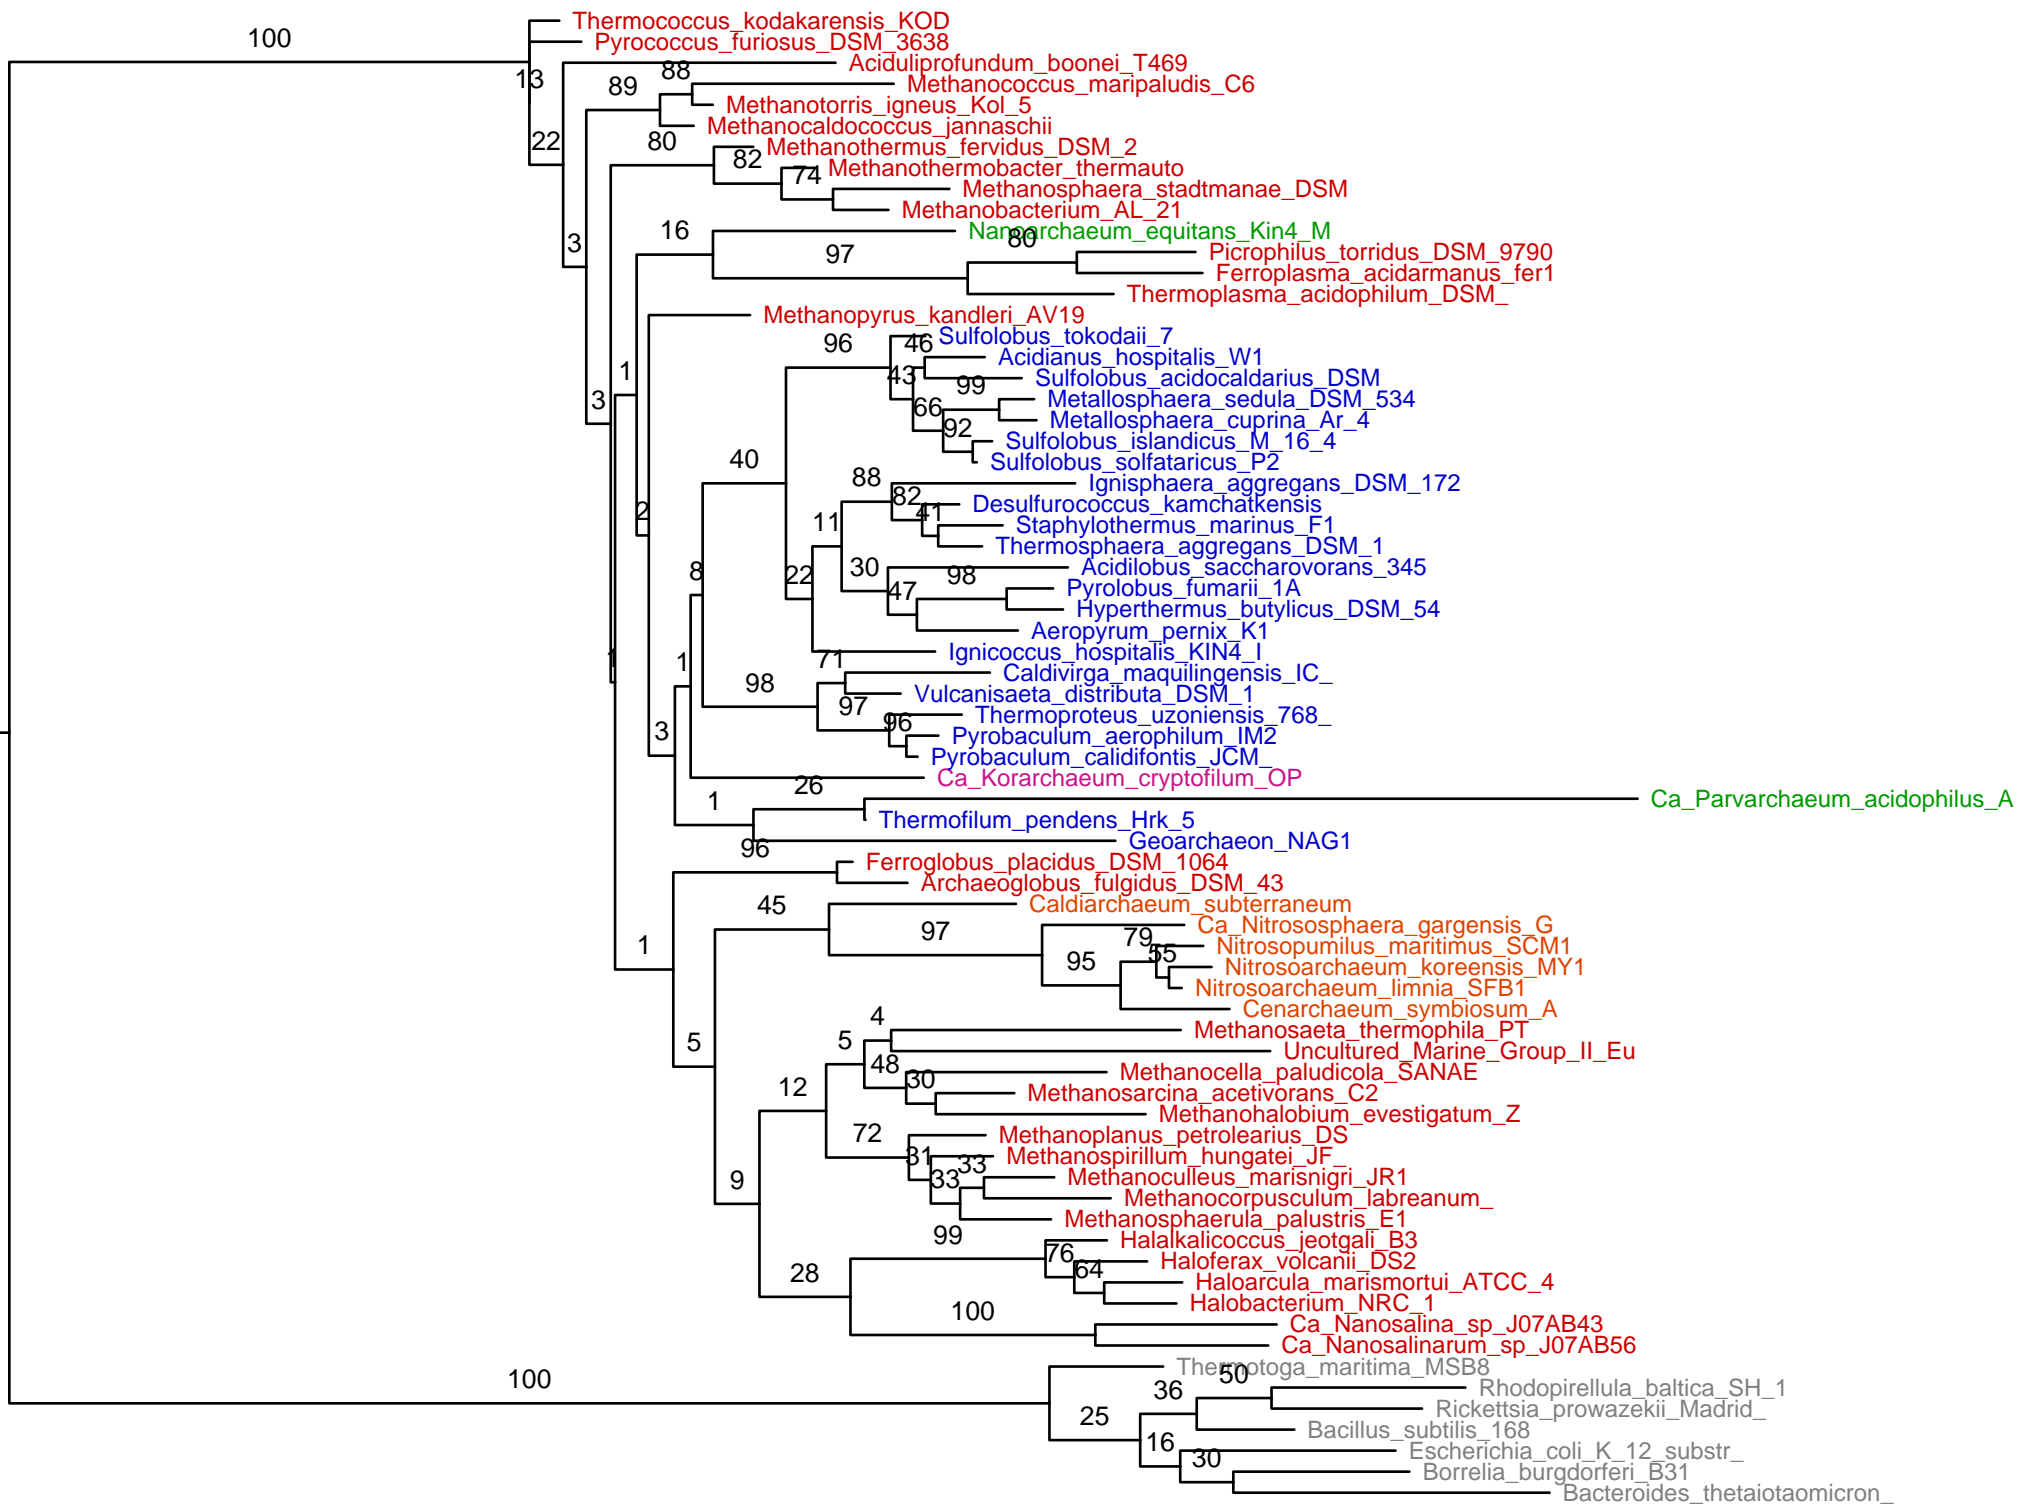

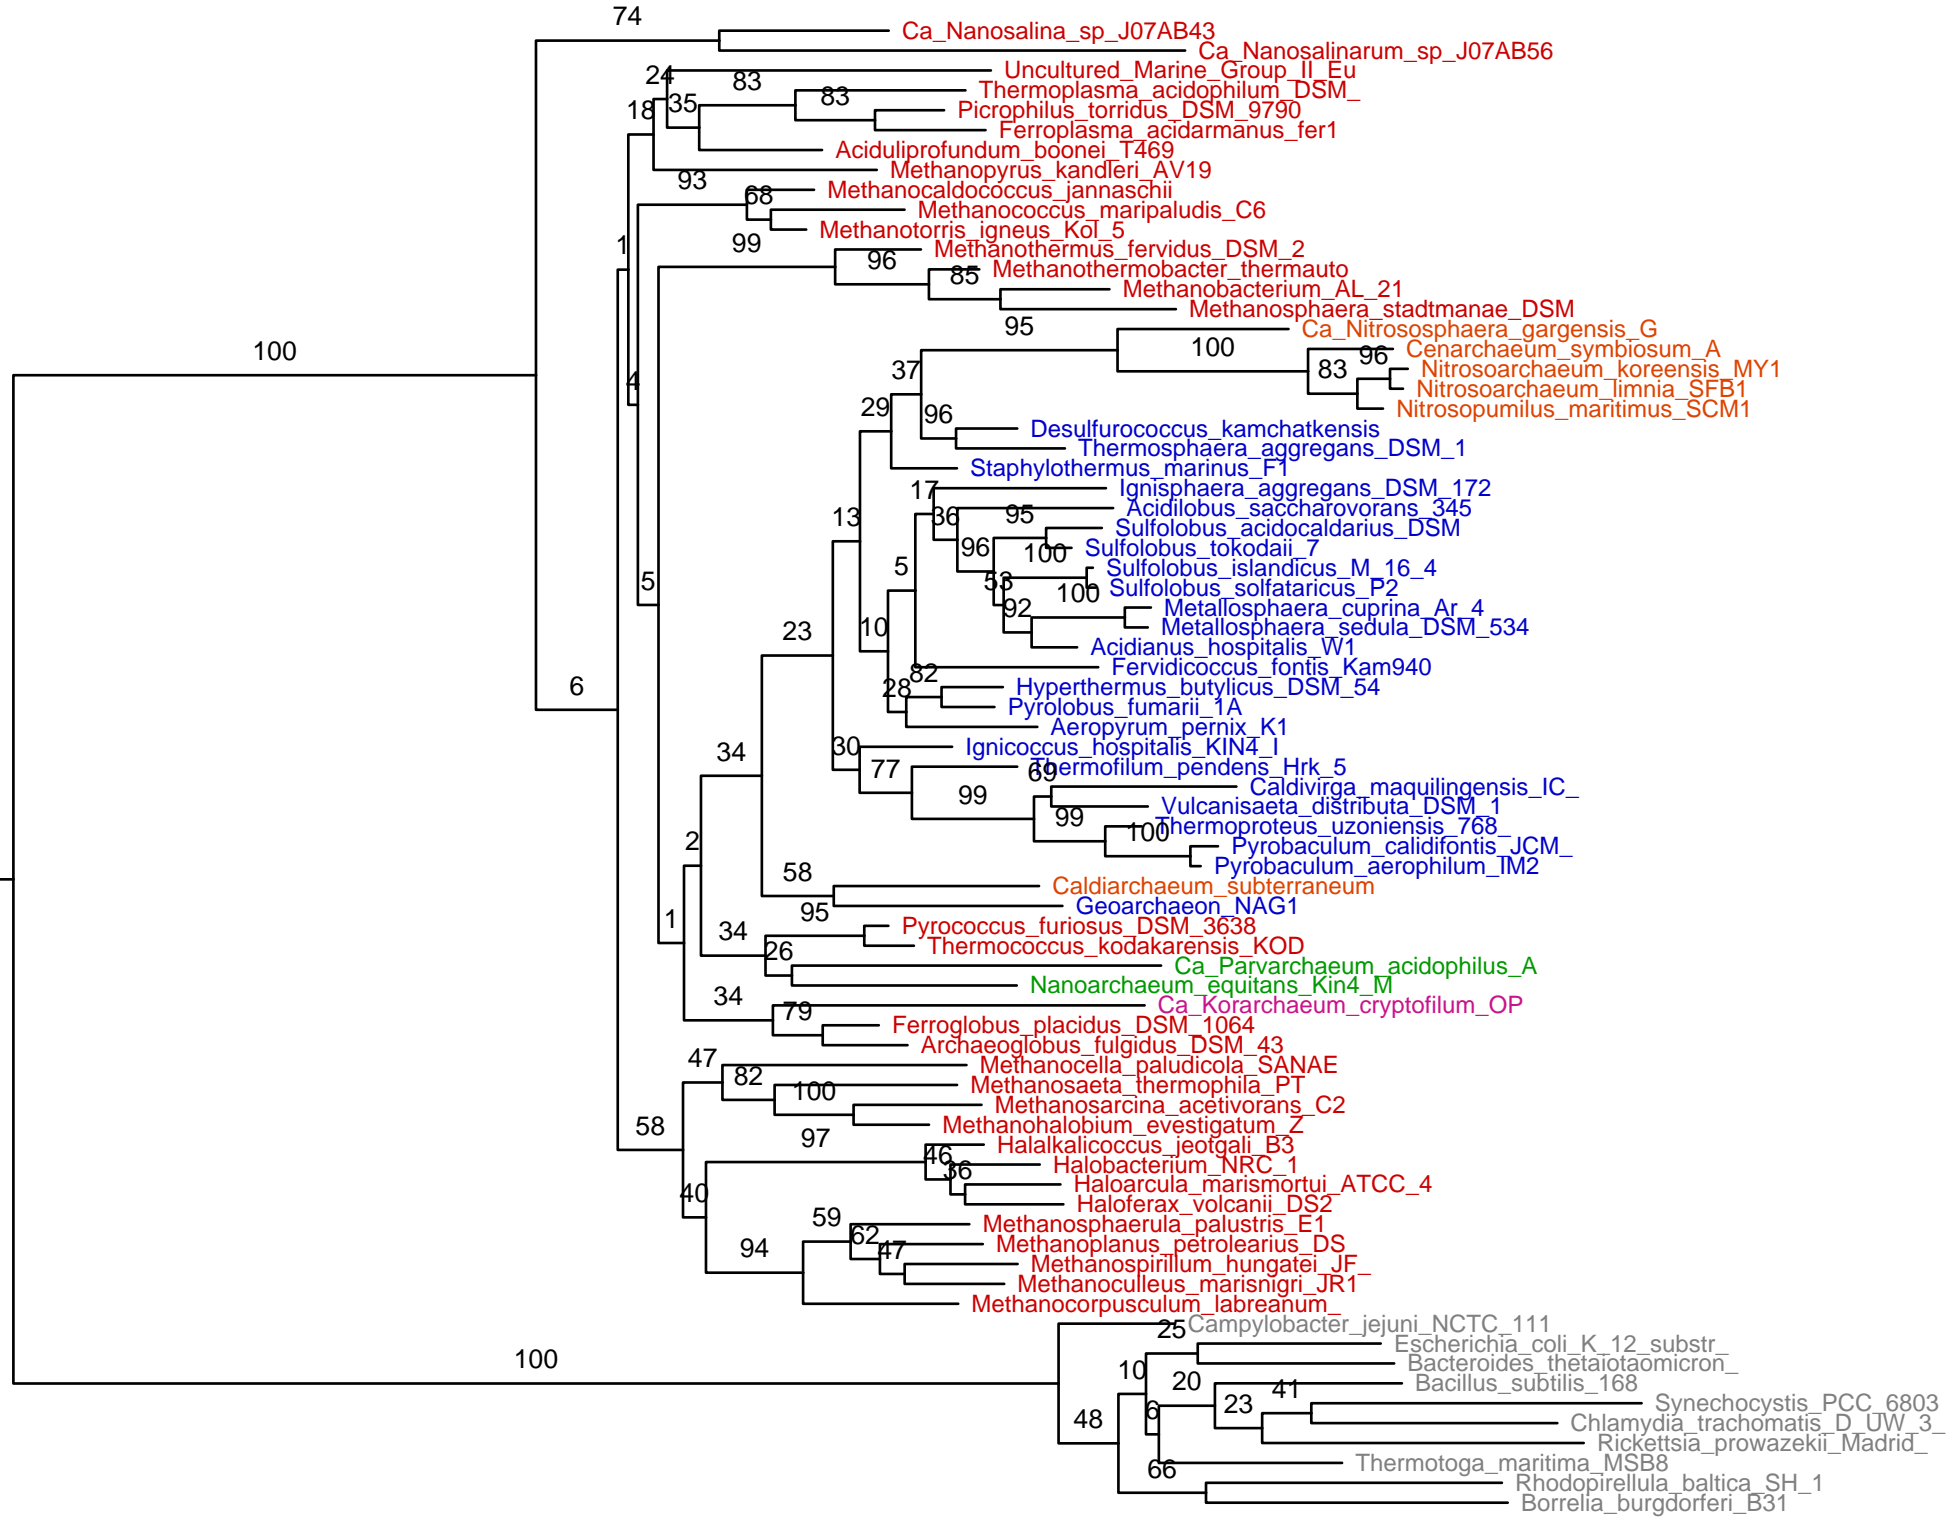

ML phylogeny of Ribosomal protein S4 or related protein (arCOG04239)



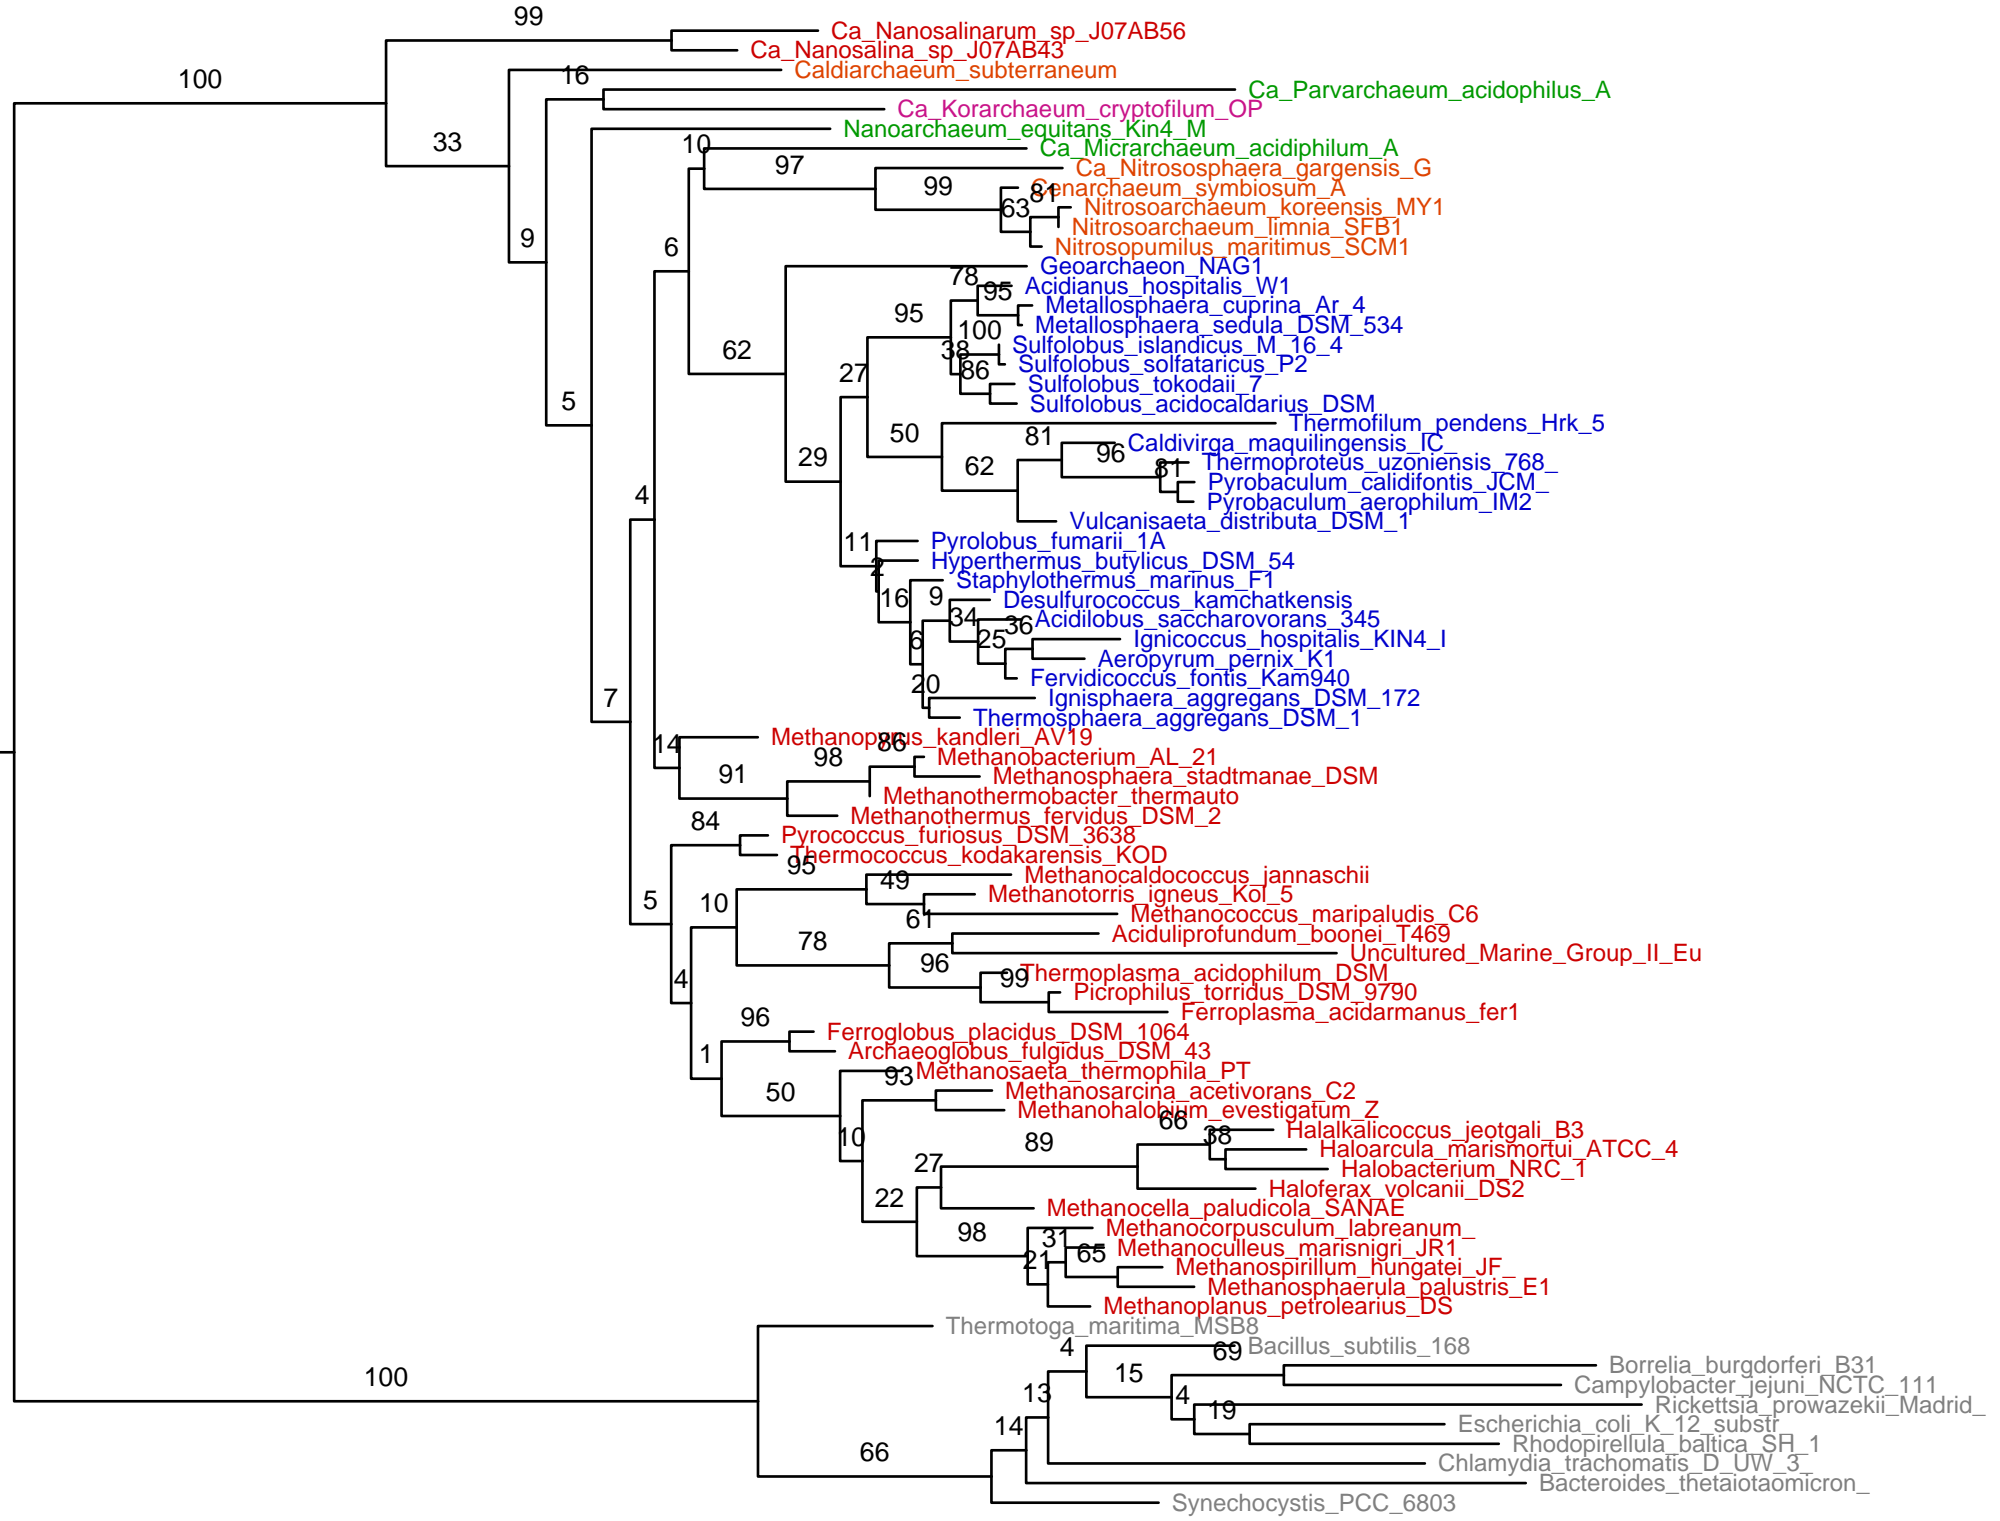

ML phylogeny of Ribosomal protein S11 (arCOG04240)

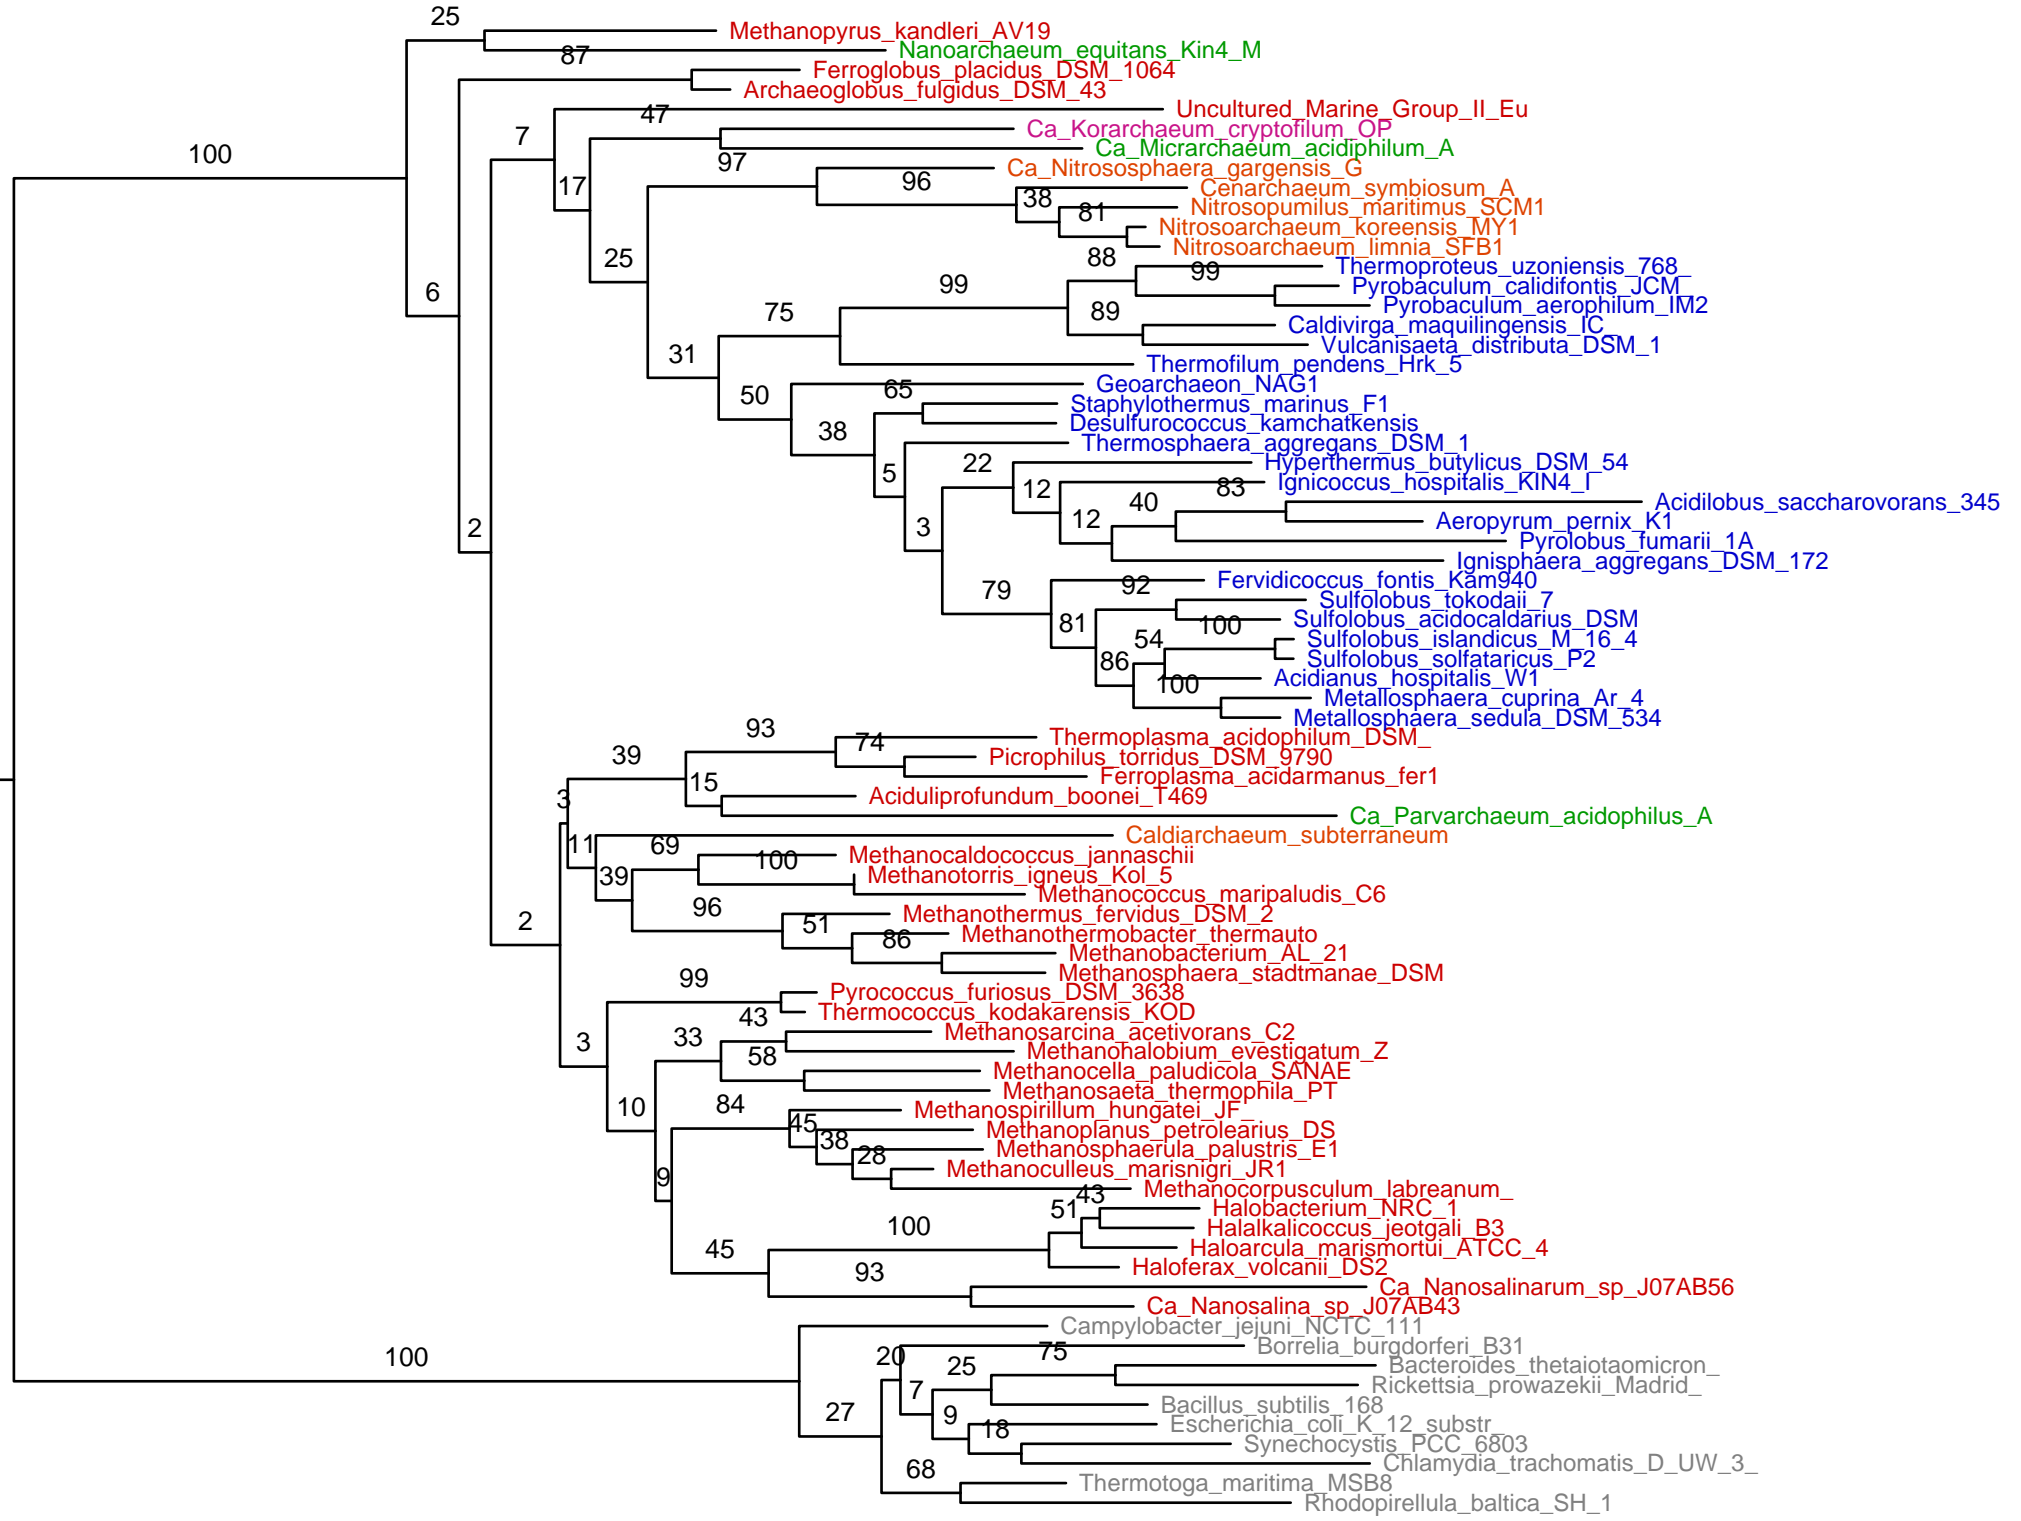

ML phylogeny of Ribosomal protein L13 (arCOG04242)

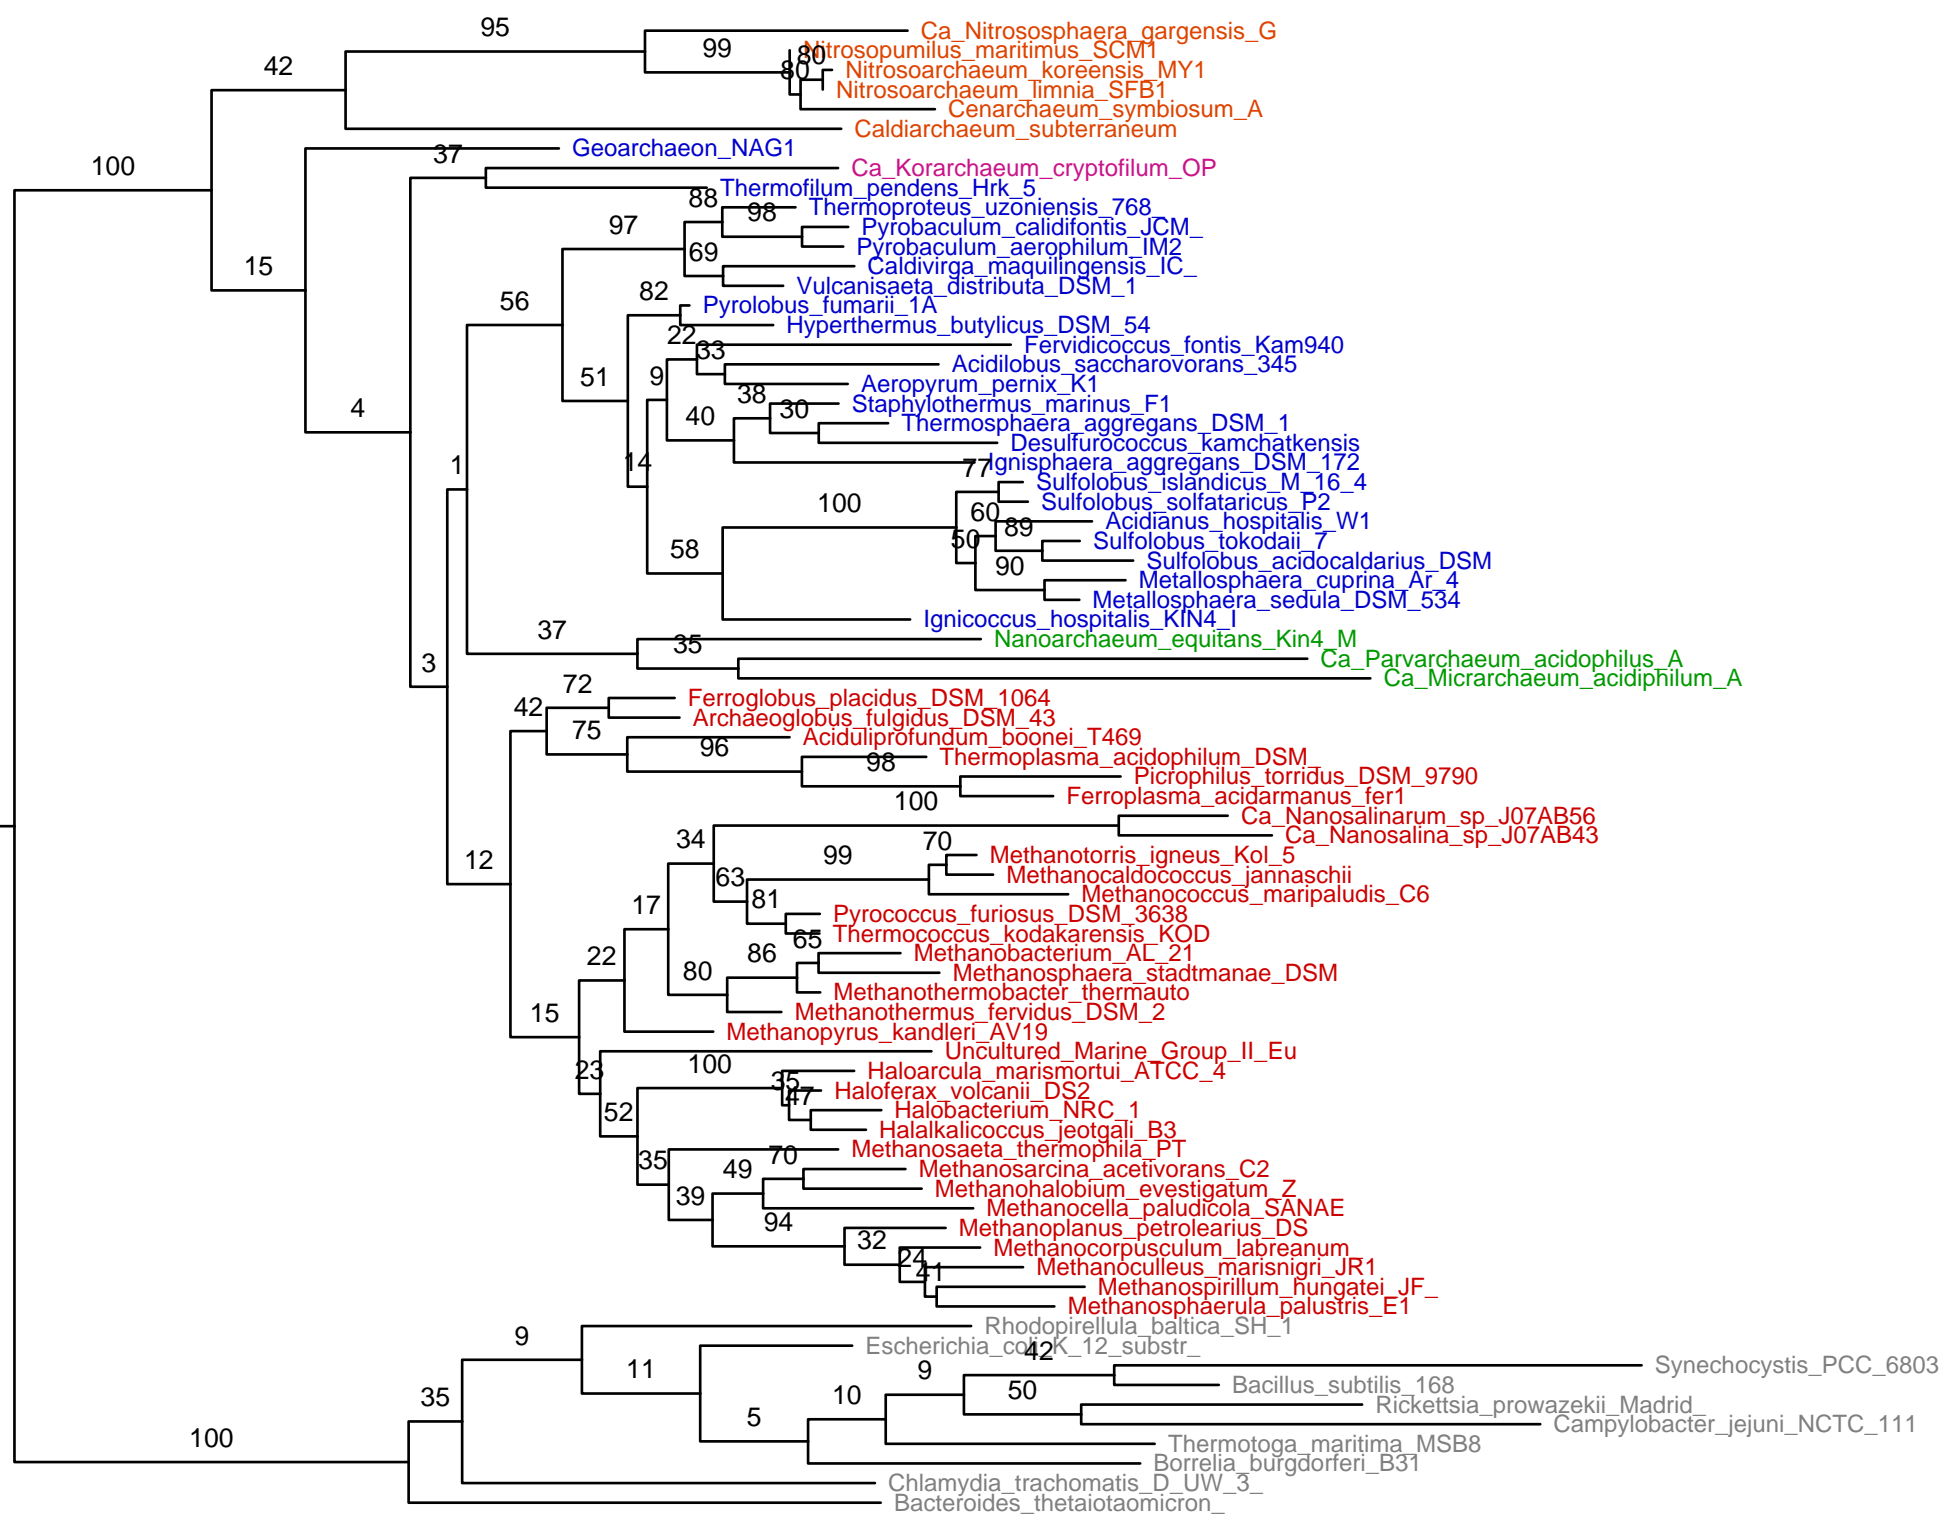

ML phylogeny of Ribosomal protein S9 (arCOG04243)

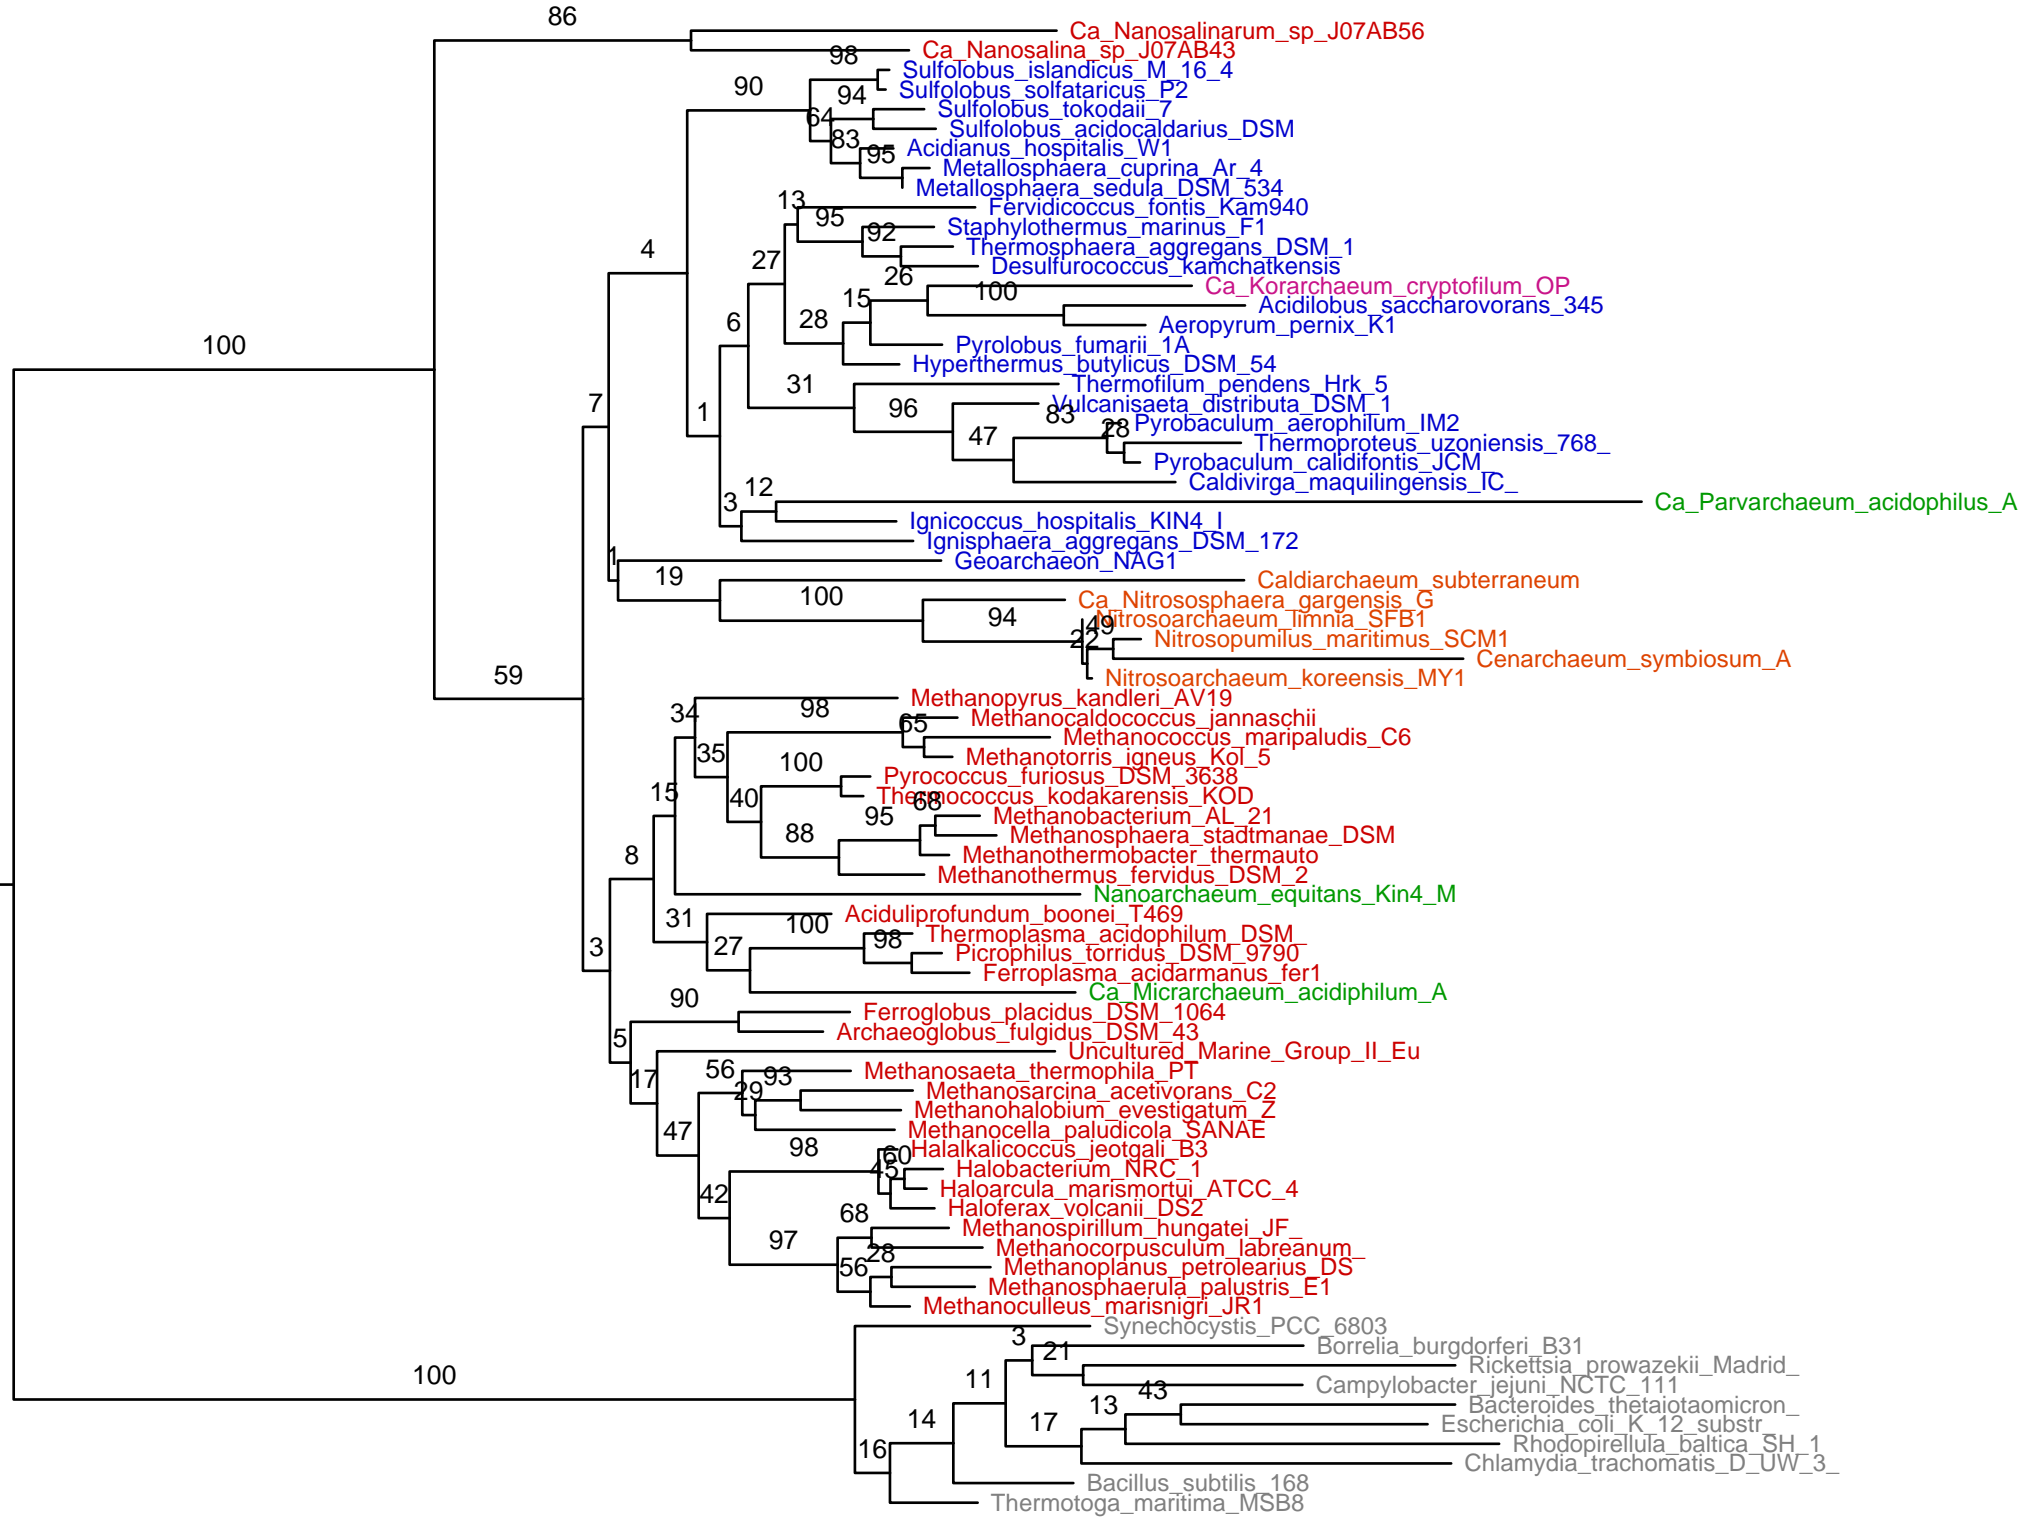

ML phylogeny of Ribosomal protein S2 (arCOG04245)

0.5

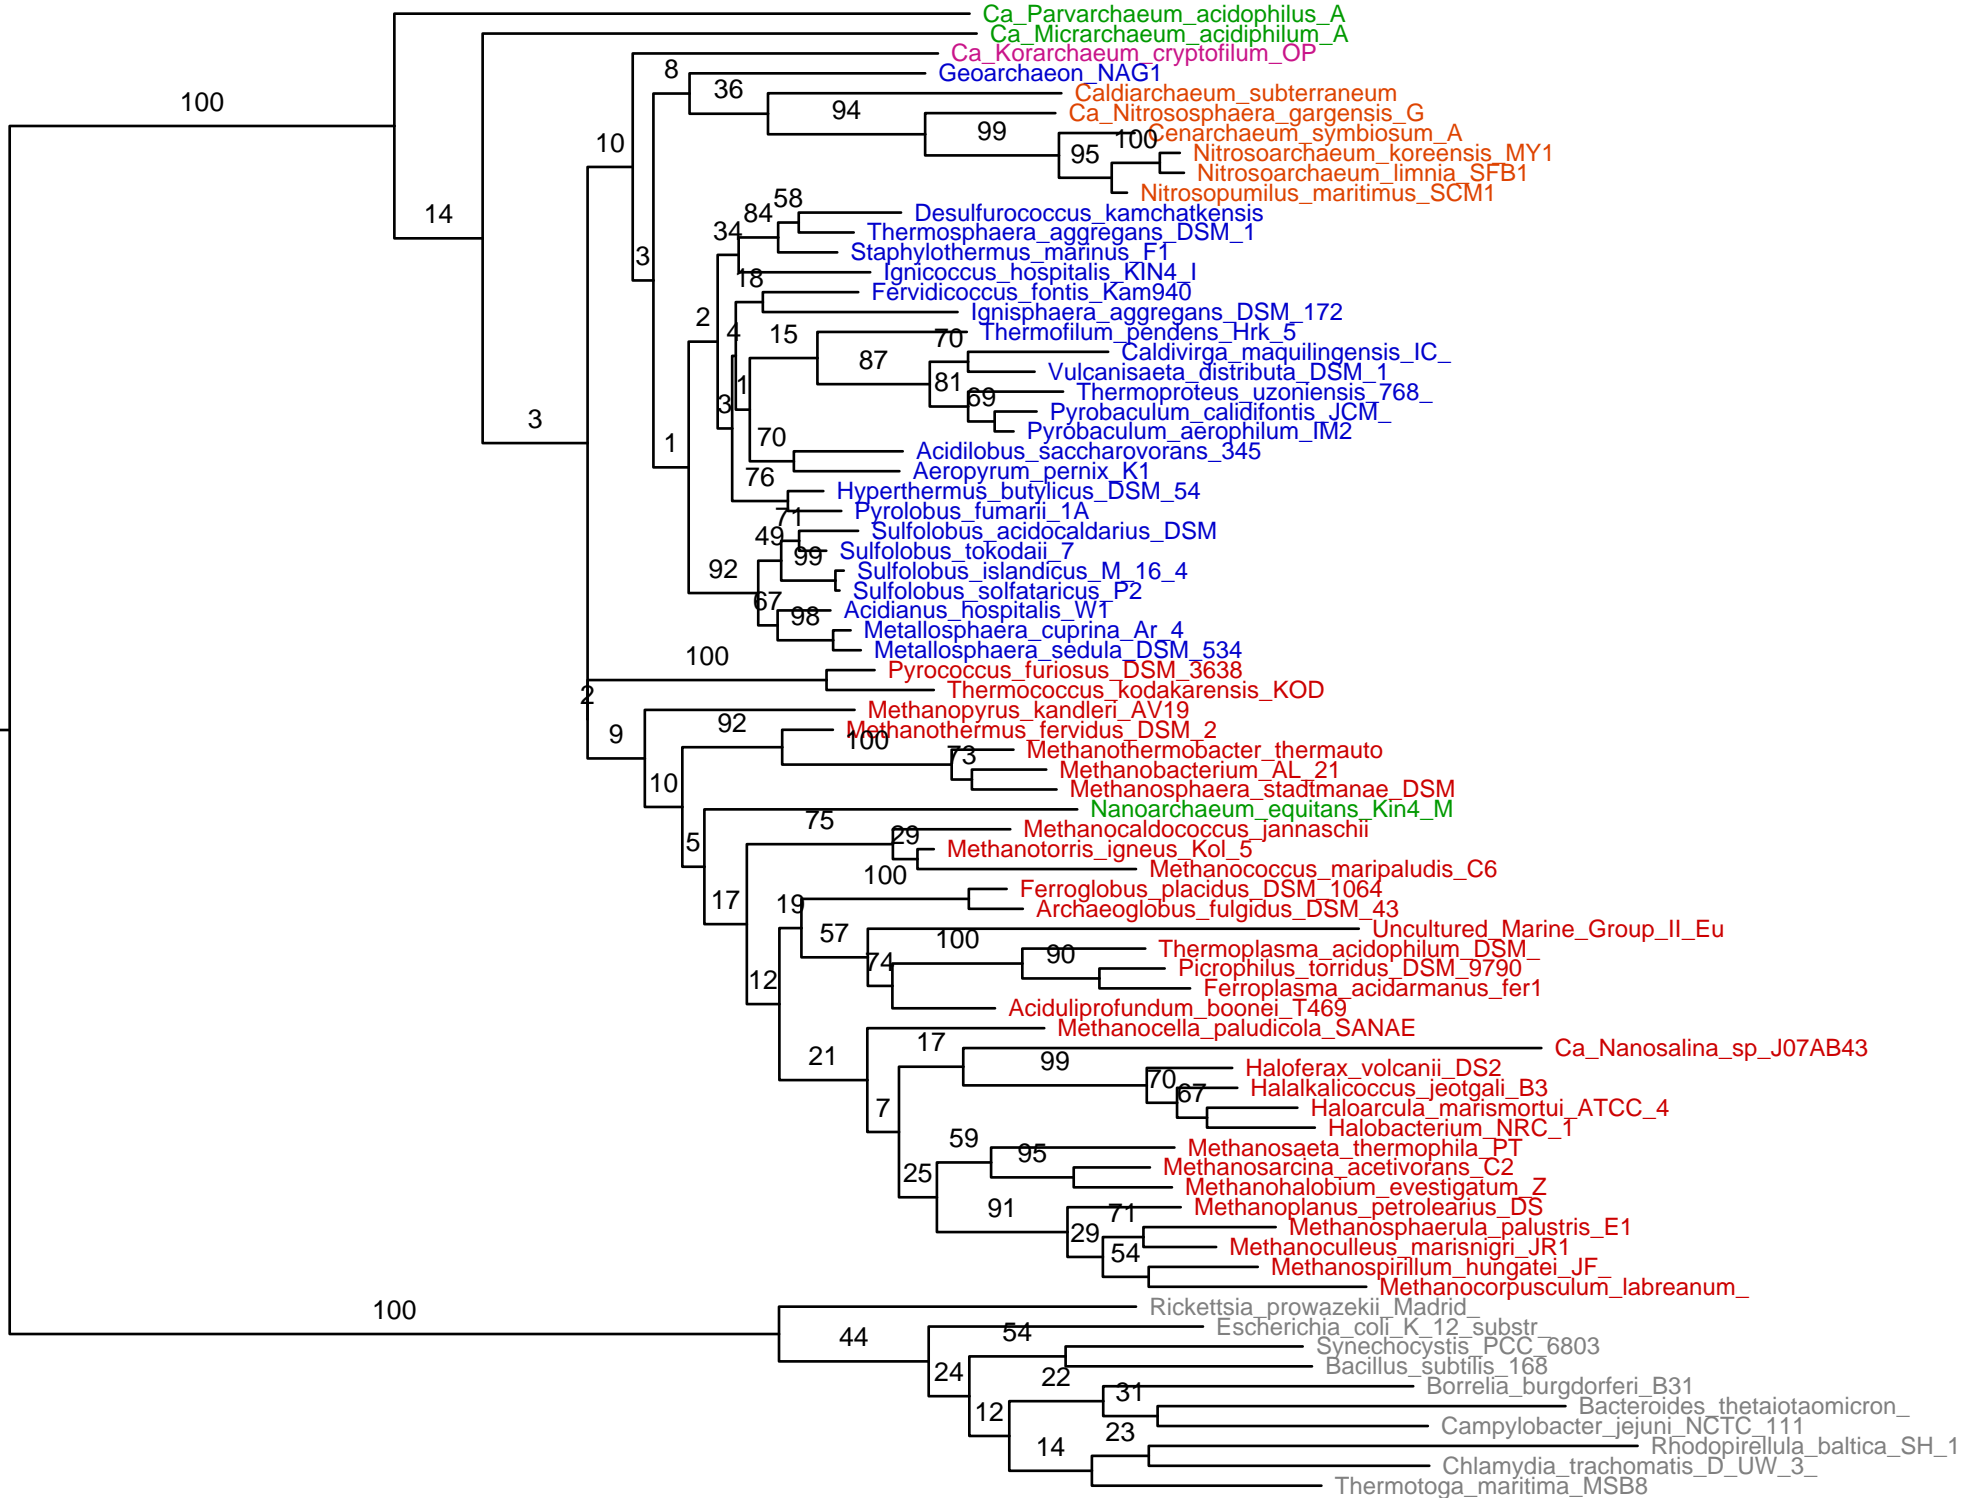

ML phylogeny of Ribosomal protein S7 (arCOG04254)

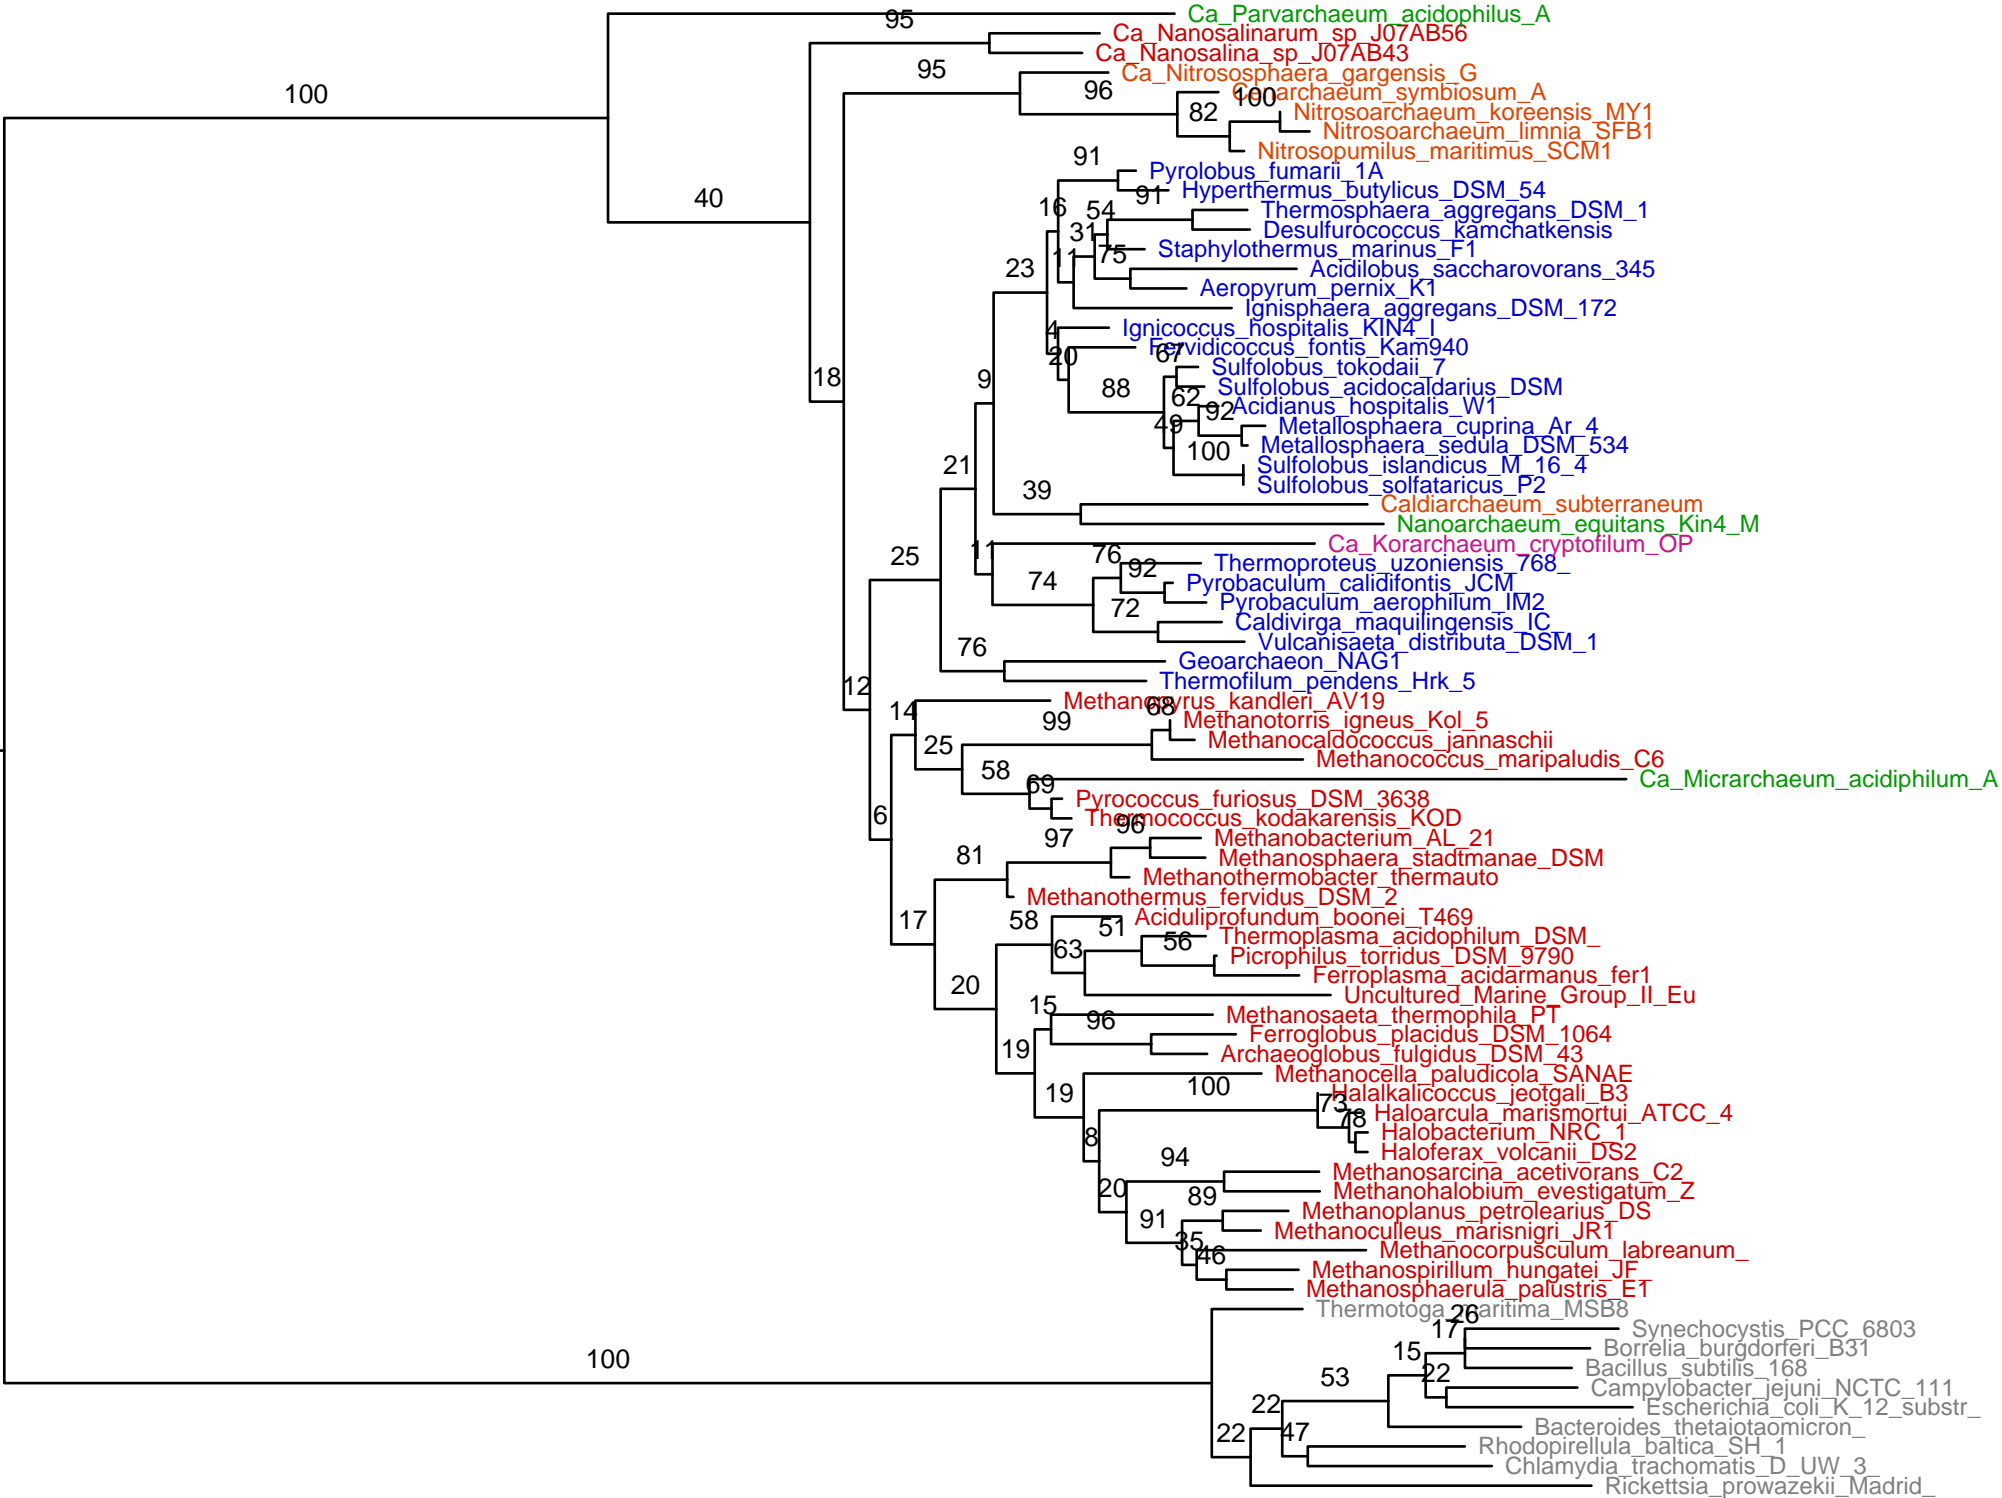

0.5  
**ML phylogeny of Ribosomal protein S12 (arCOG04255)**

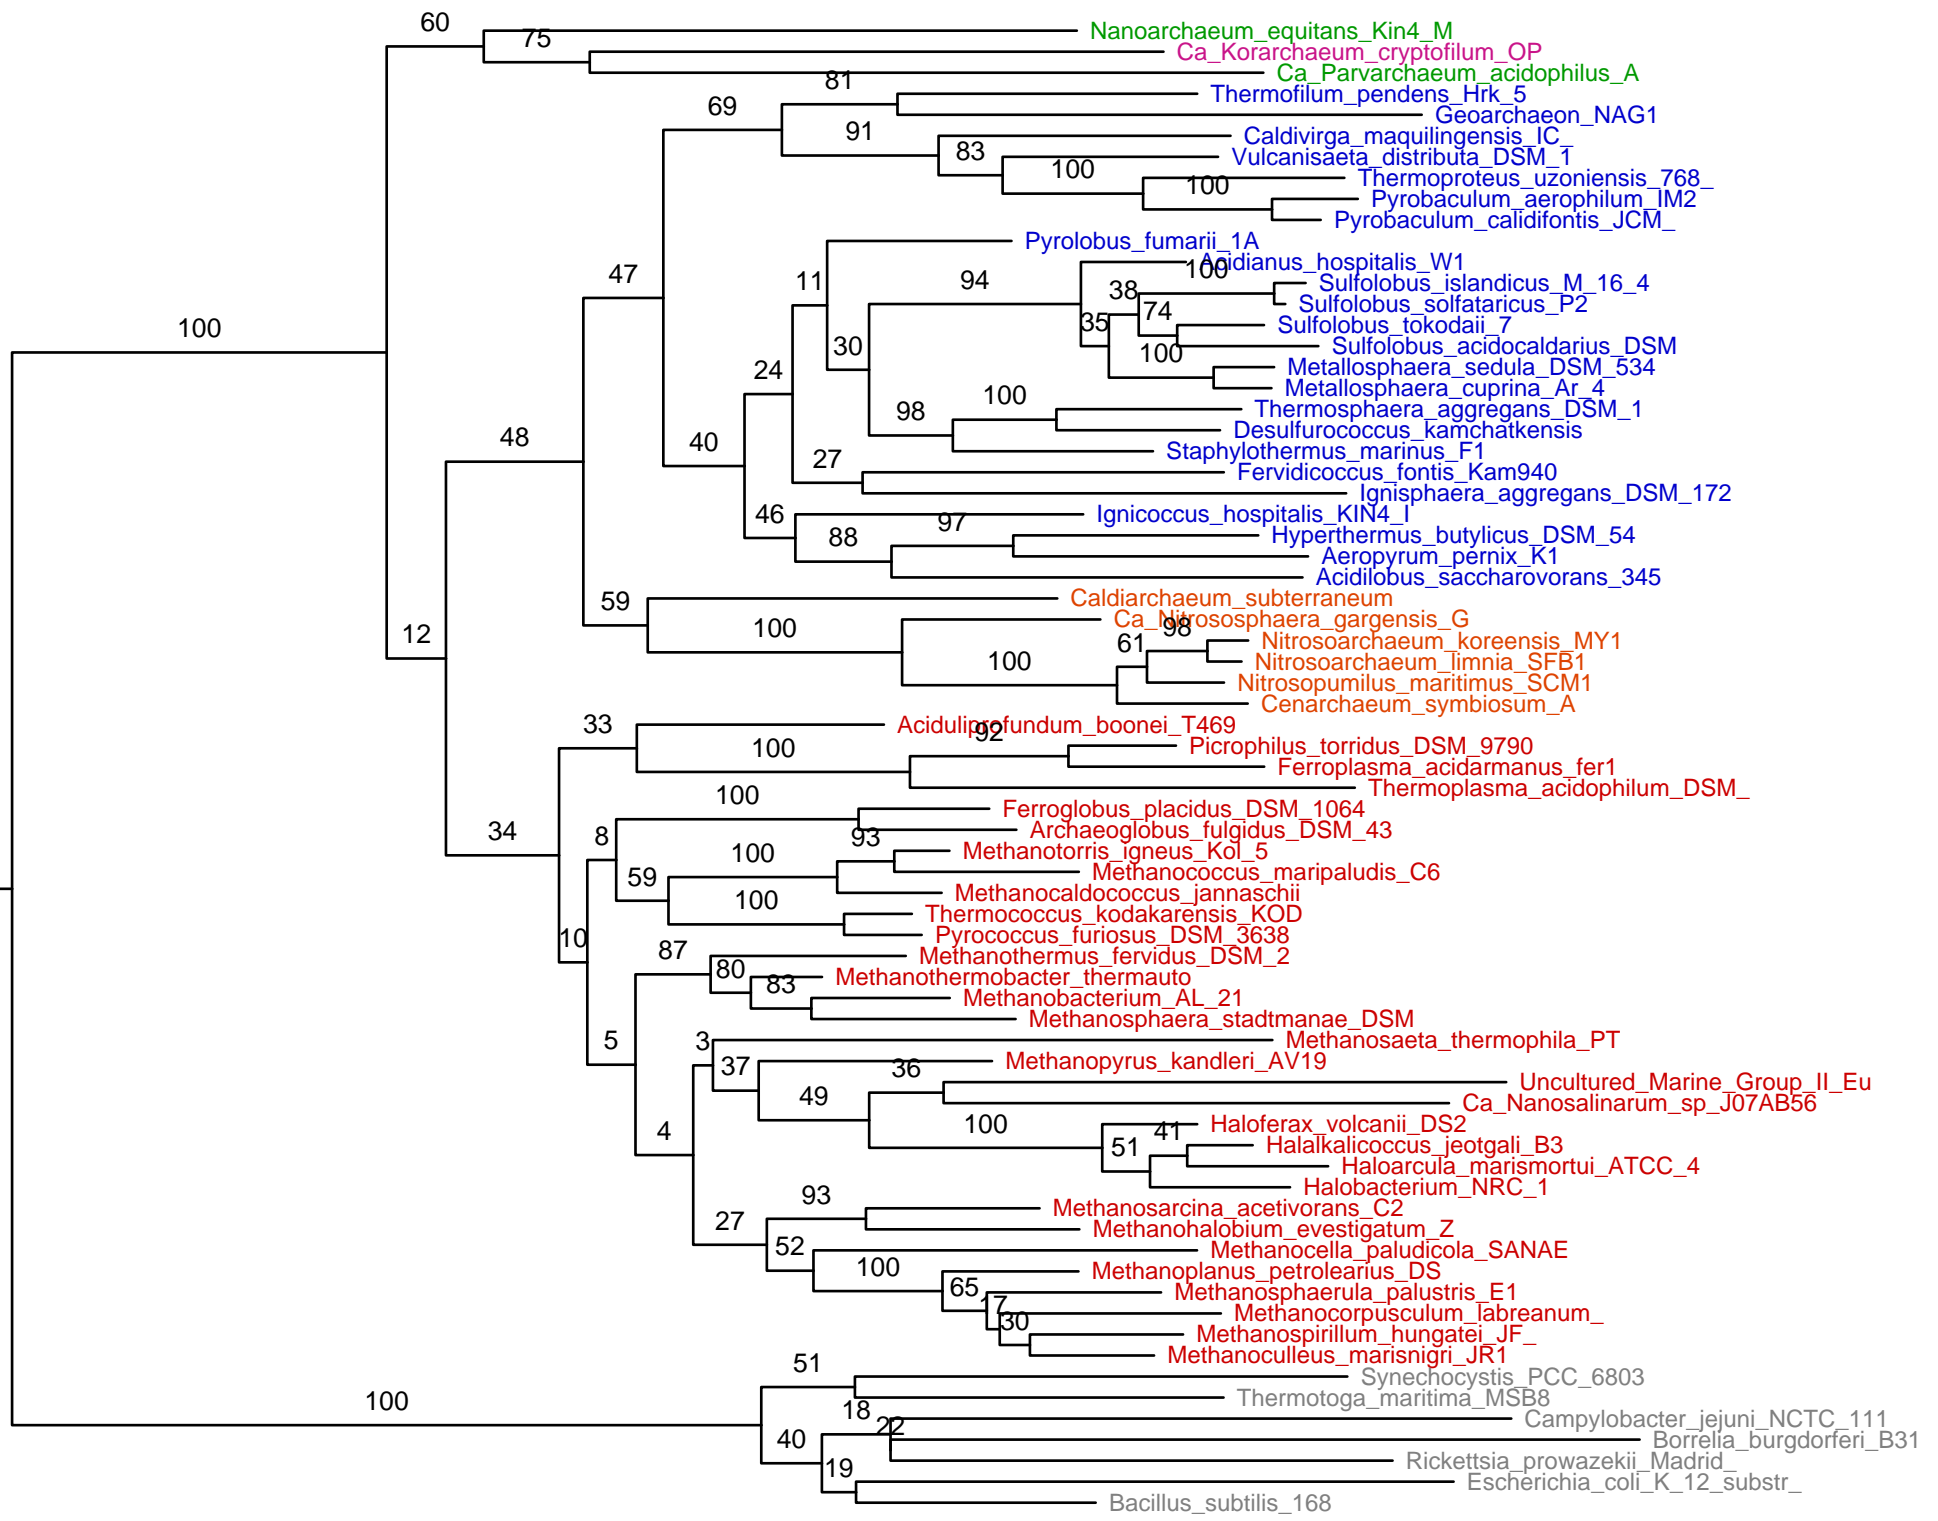

0.4  
ML phylogeny of Ribosomal protein L10 (arCOG04288)

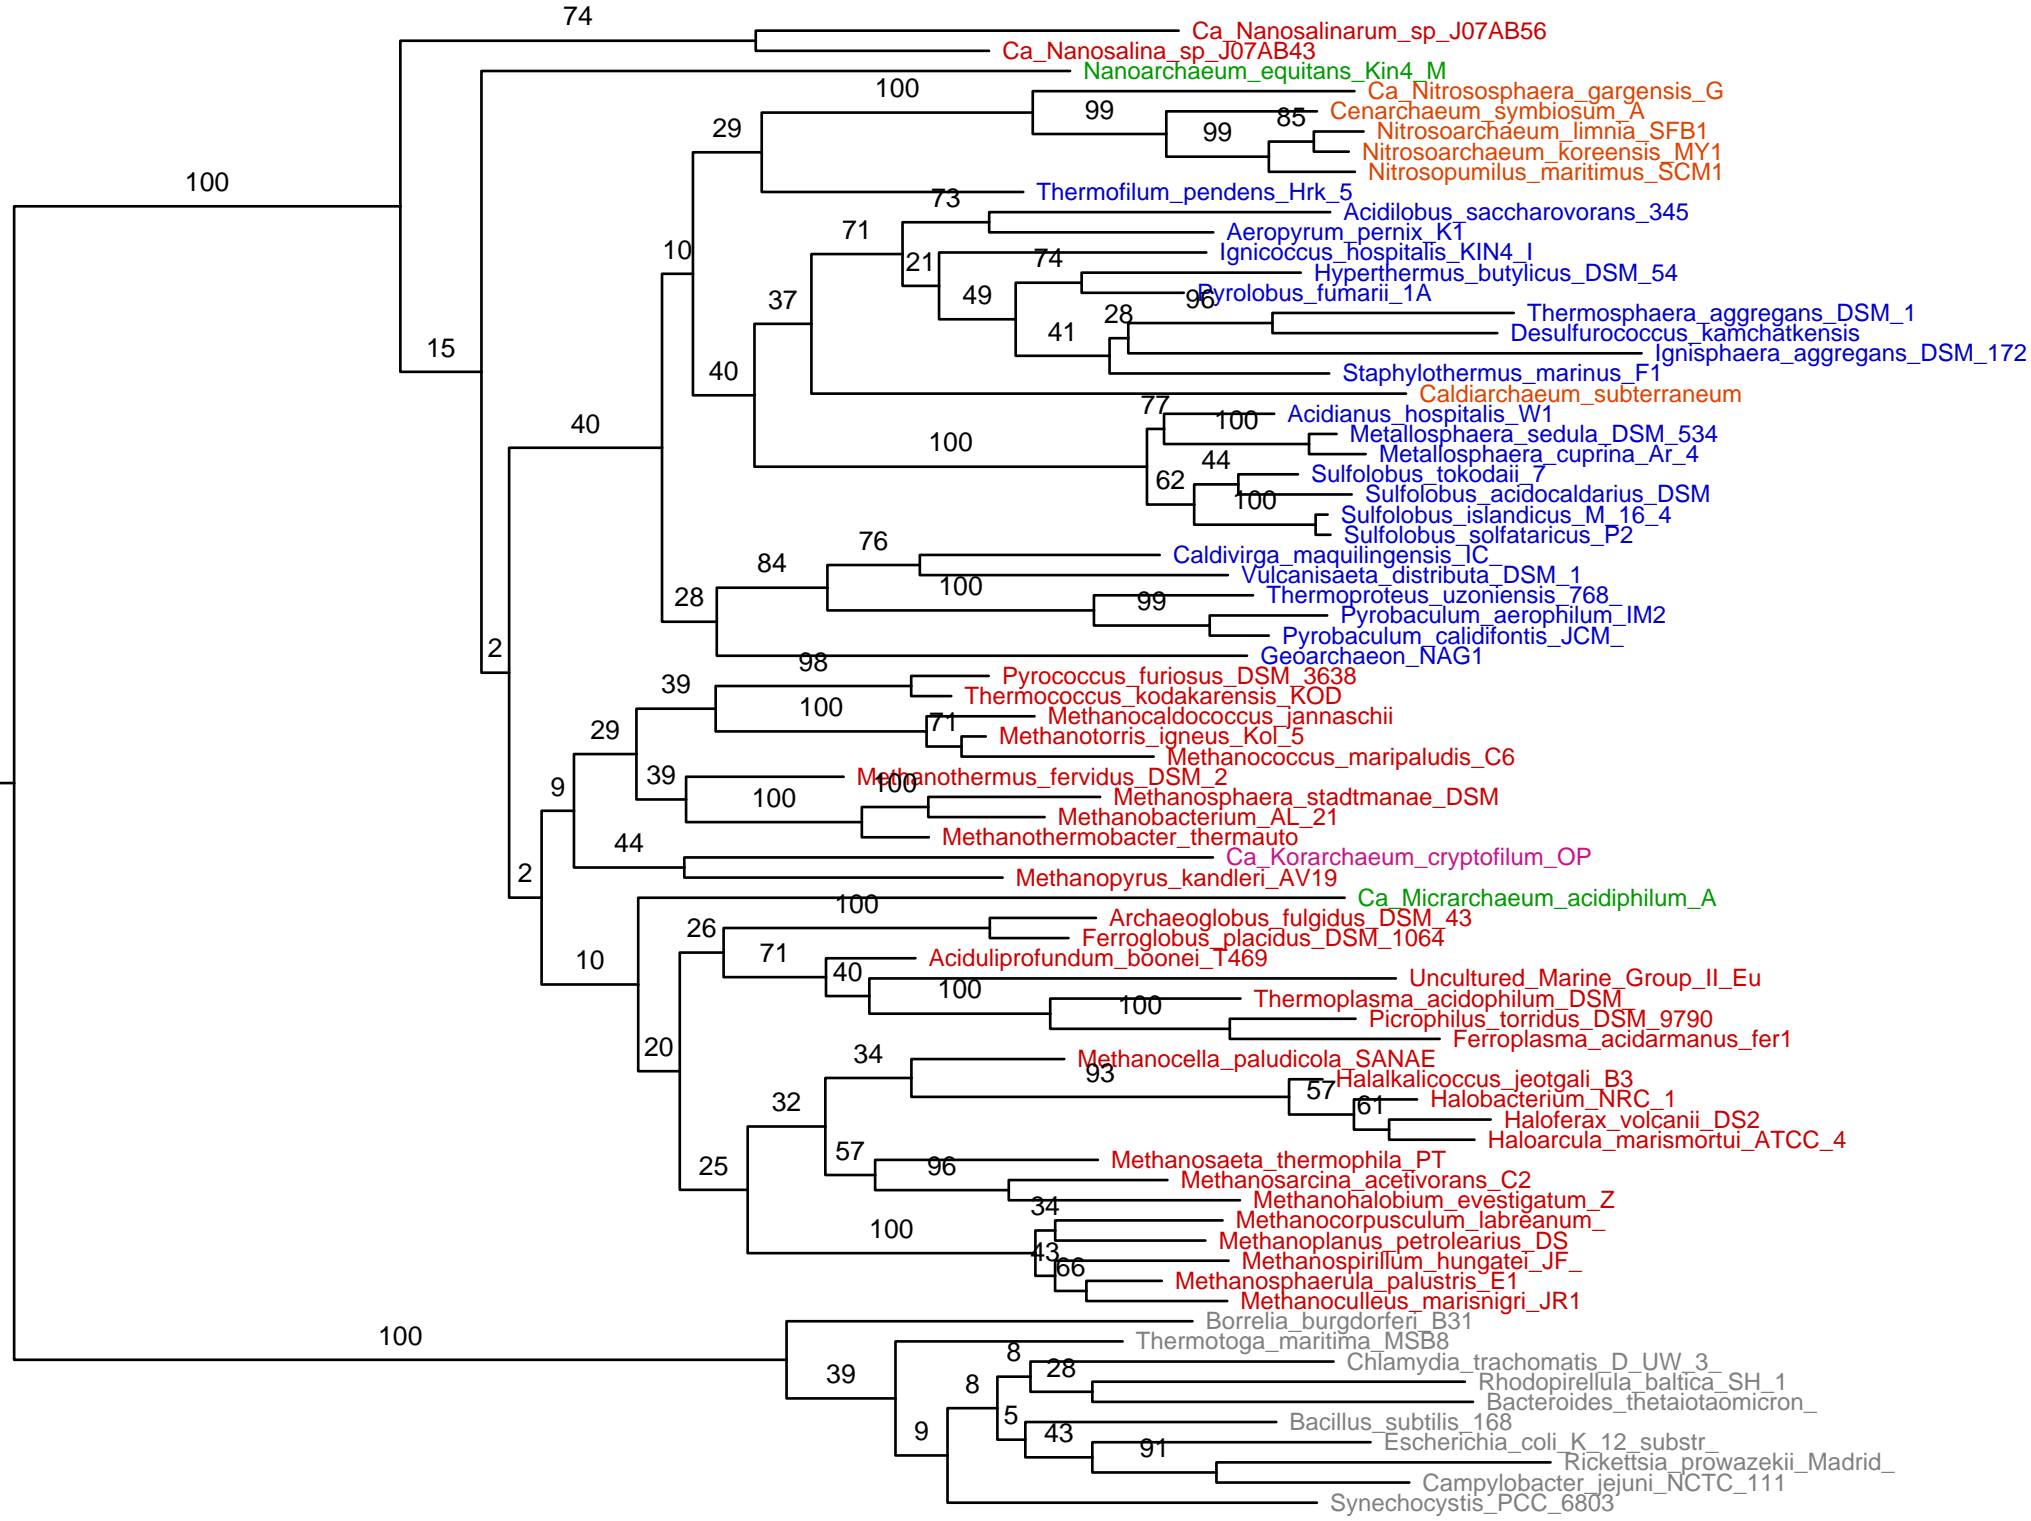

0.4

ML phylogeny of Ribosomal protein L1 (arCOG04289)



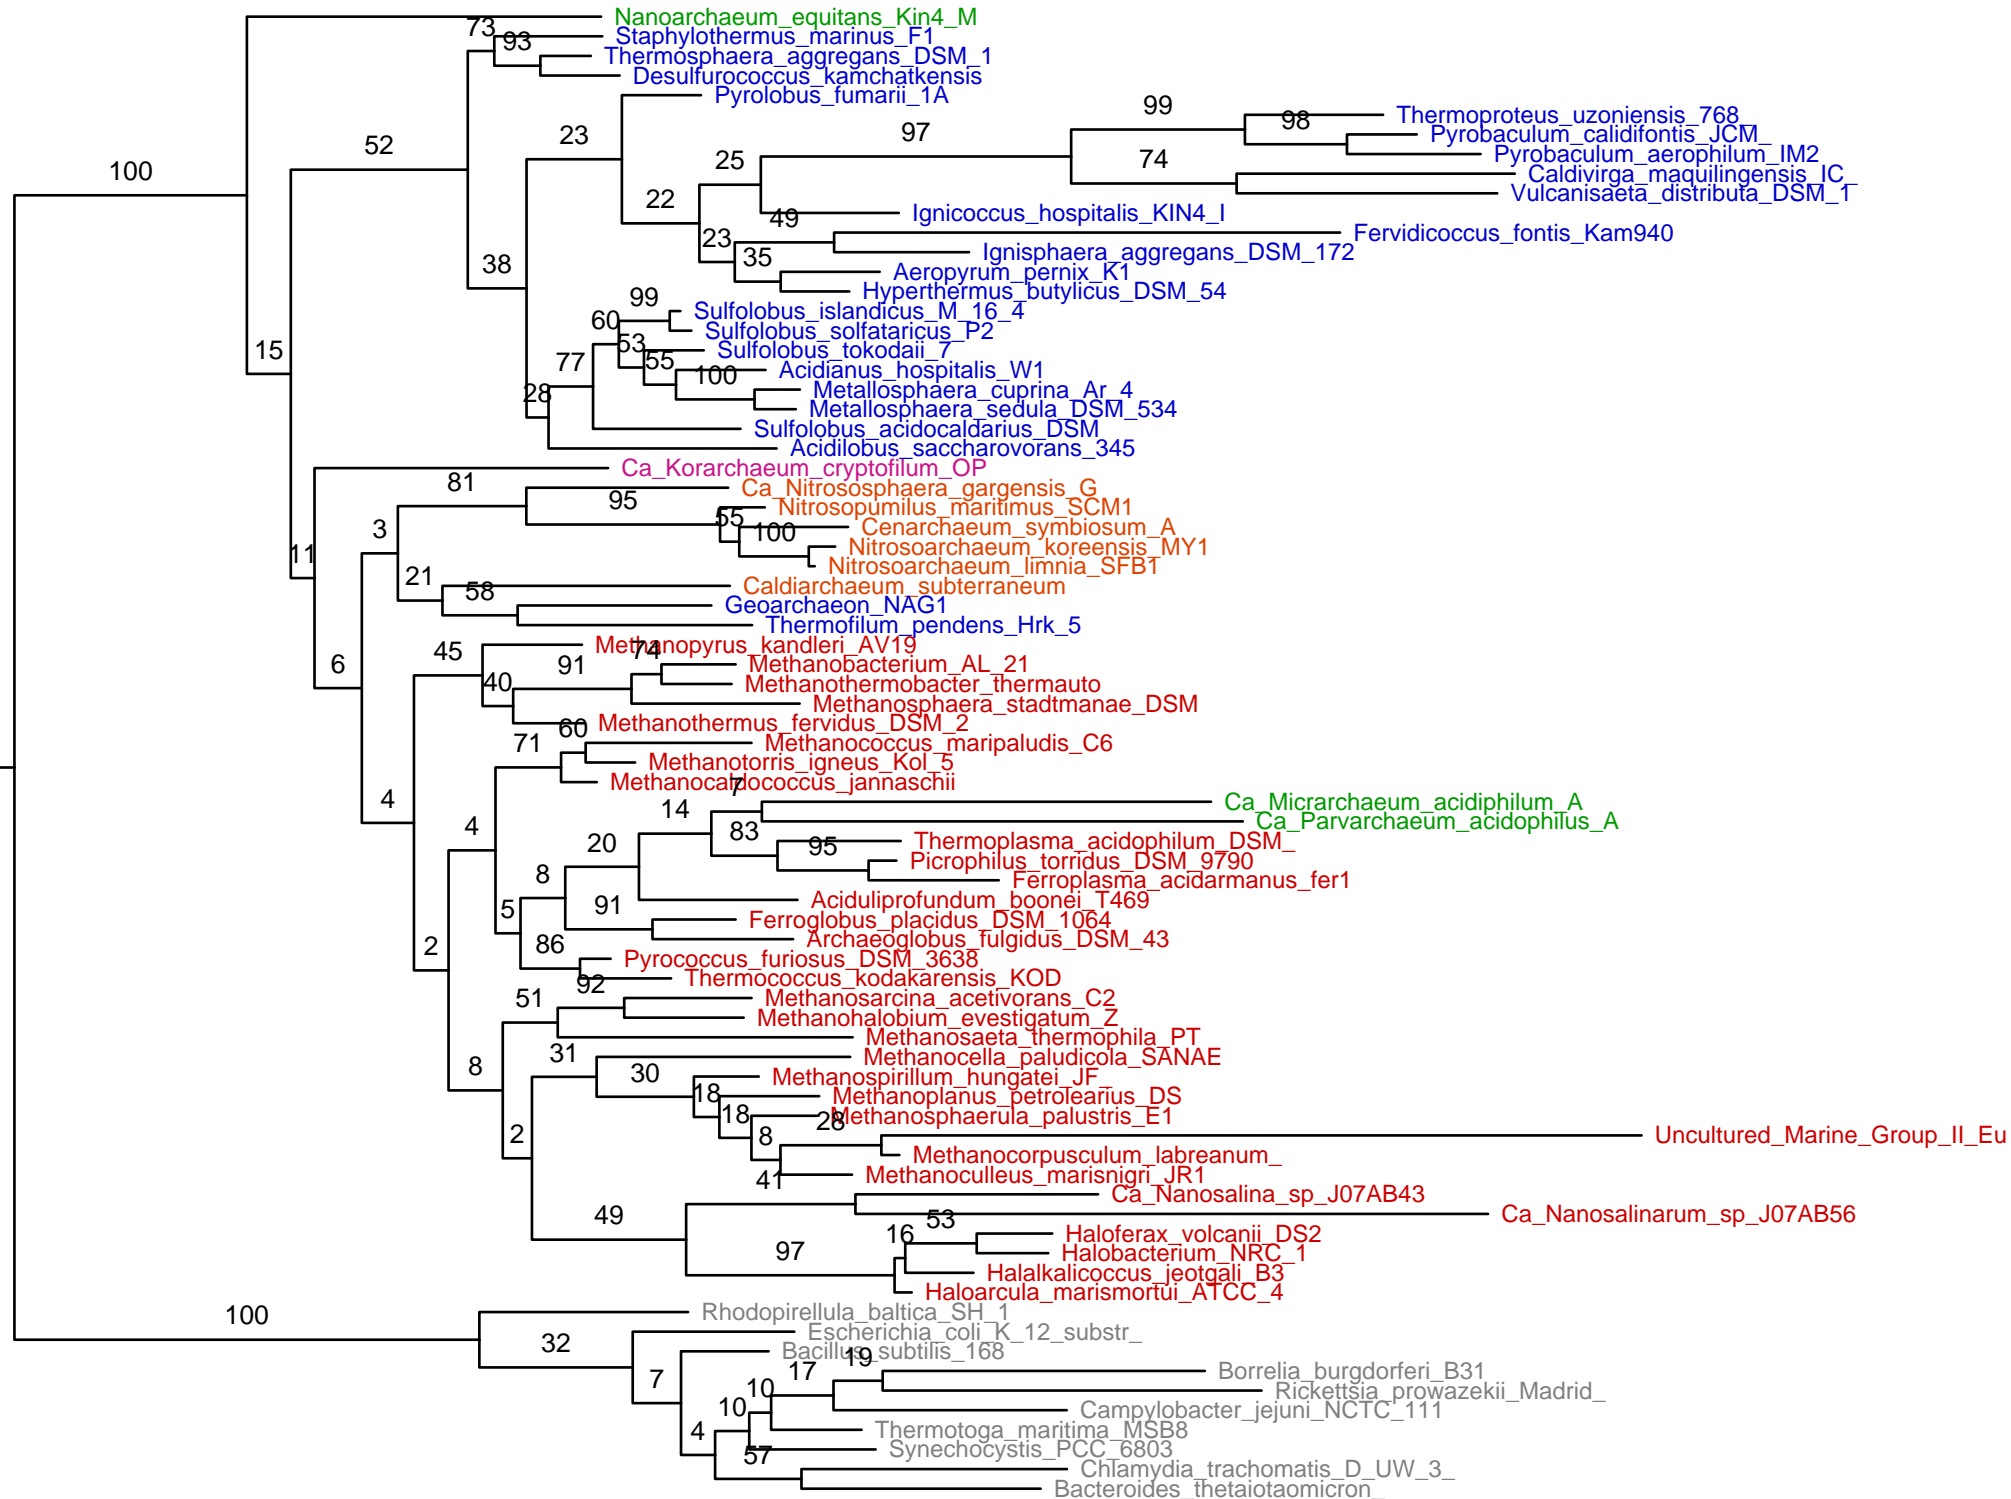

0.3

ML phylogeny of Ribosomal protein L11 (arCOG04372)
