# Supplementary material
Source: PubMed Central journal article supplement (PMC4069404)
Supplement: ismej20146x2.pdf [file ismej20146x2.pdf]

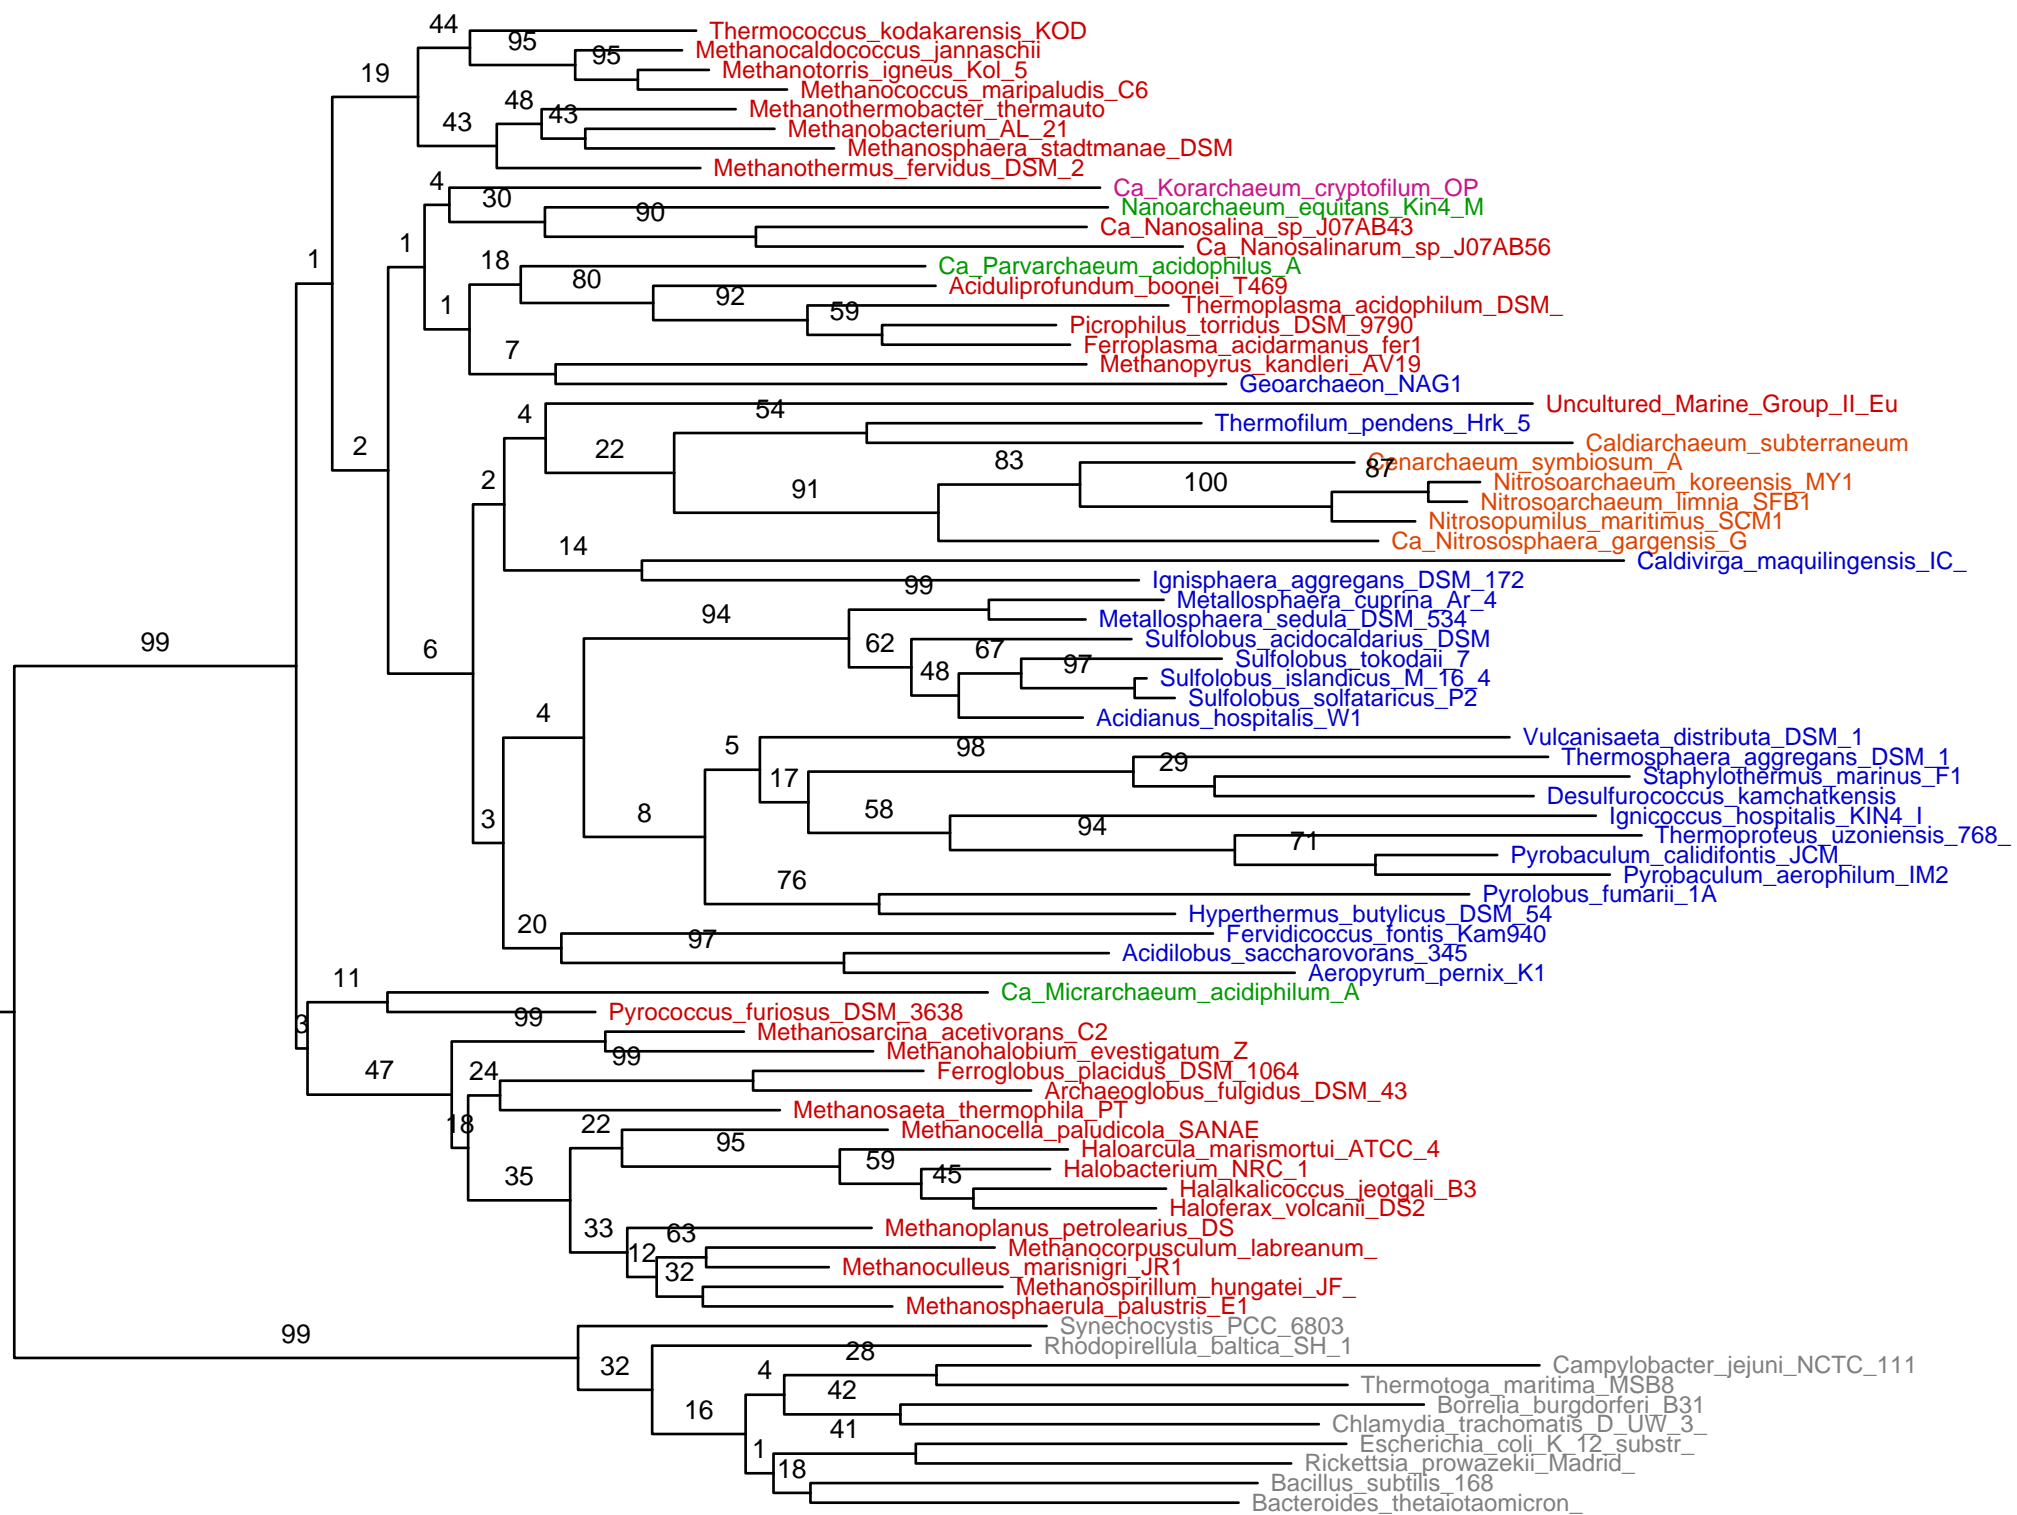

ML phylogeny of arCOG00109: Methylase of polypeptide chain release factors

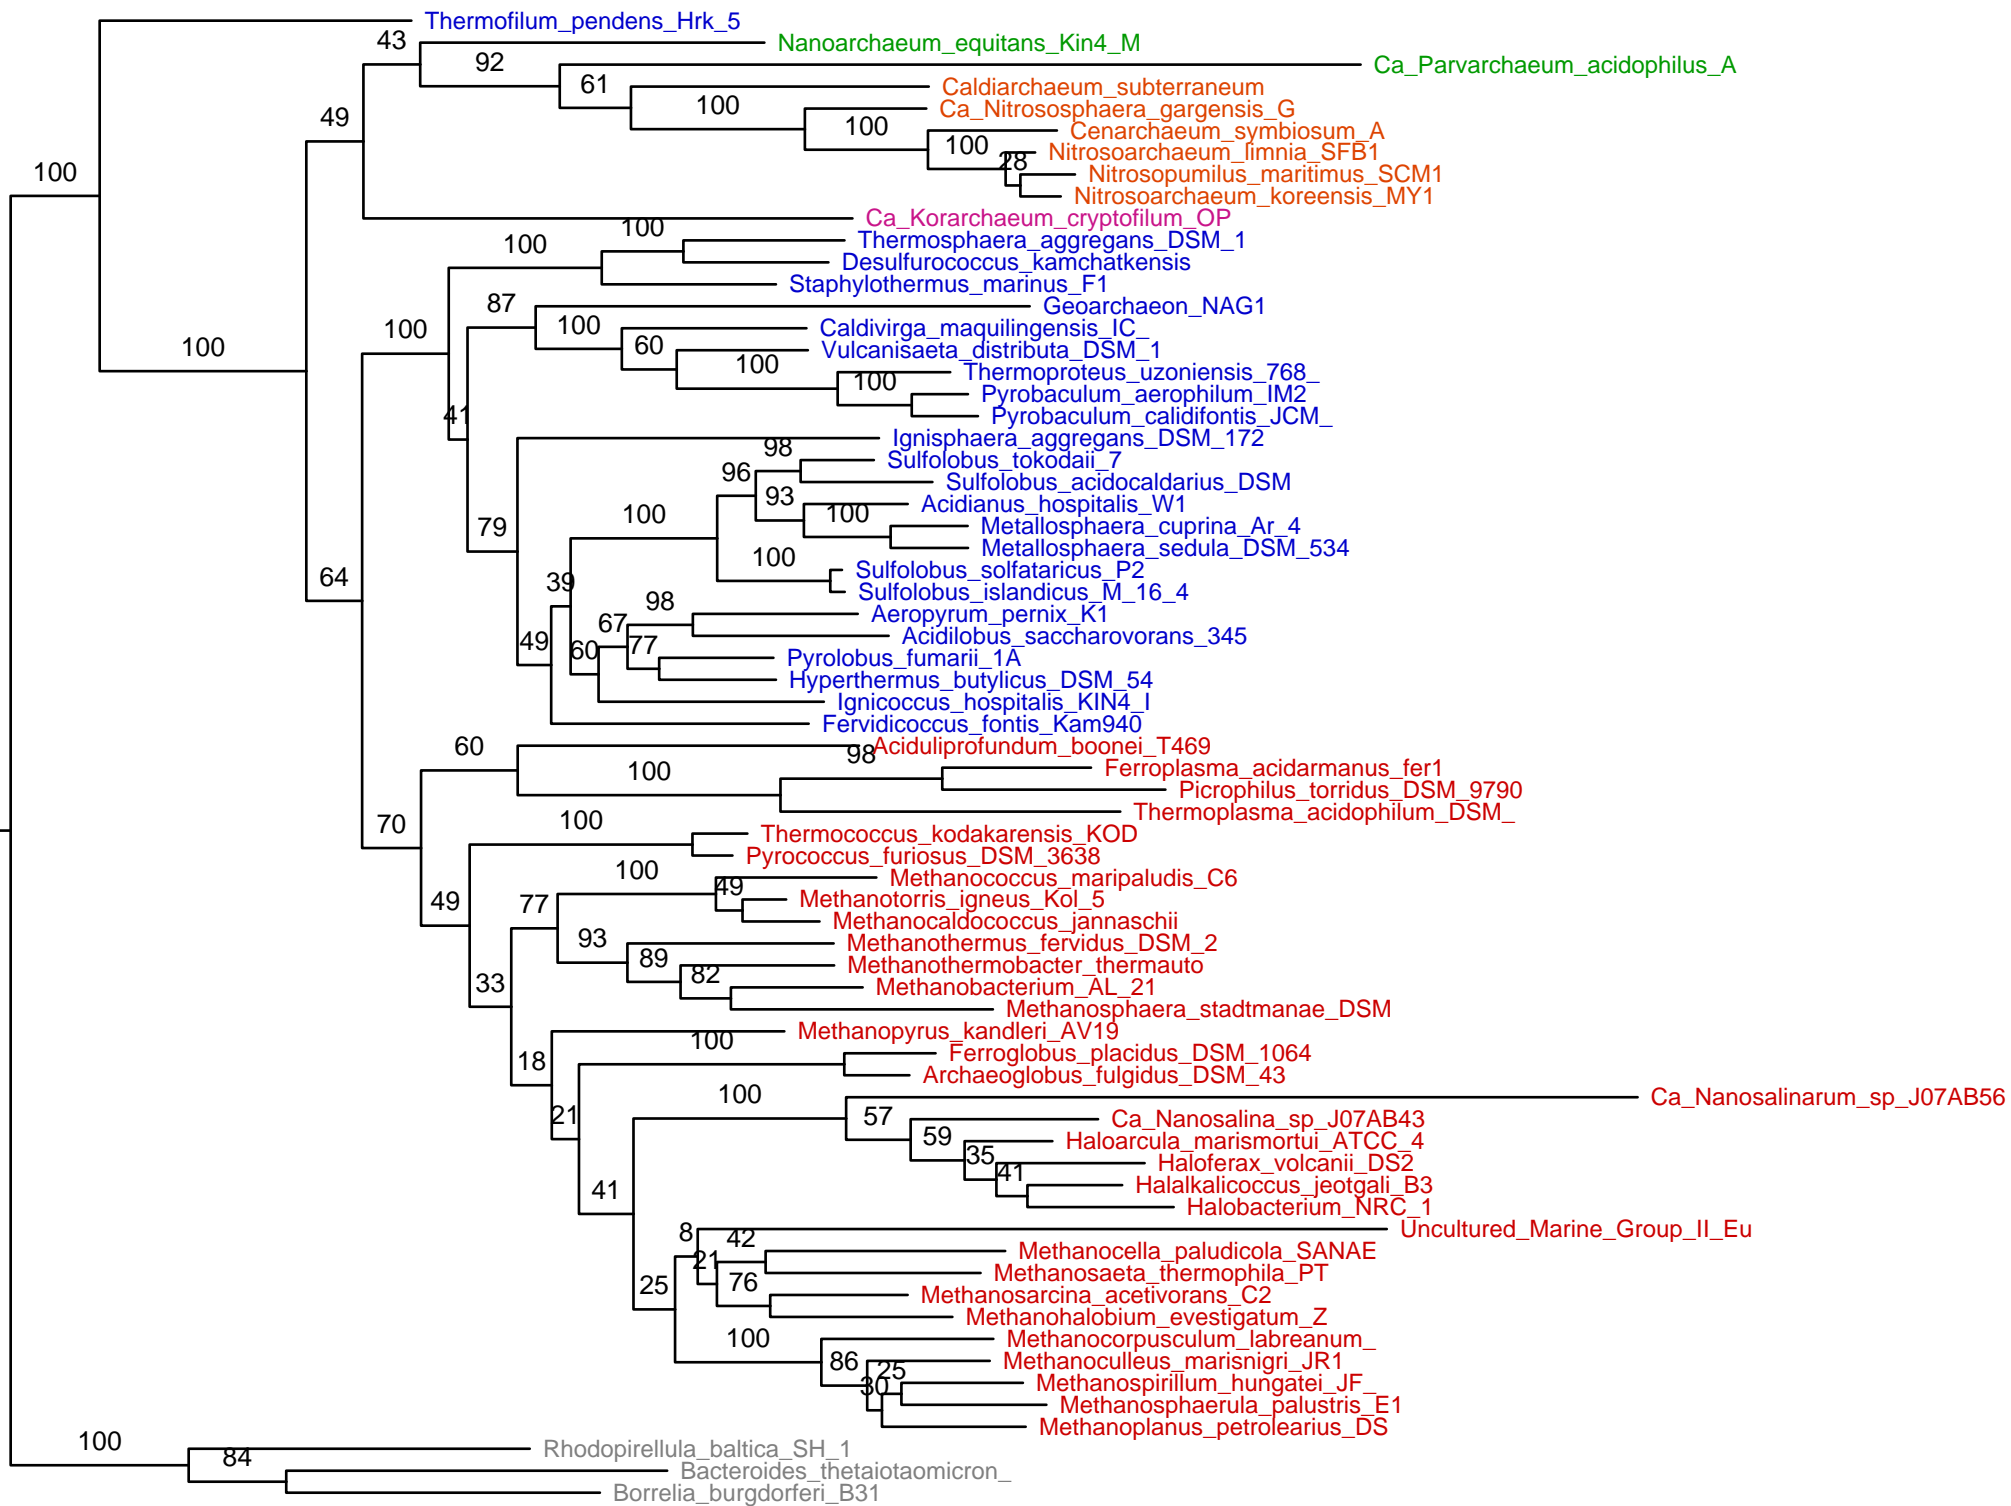

0.3

ML phylogeny of arCOG00405: Glycyl-tRNA synthetase (class II)

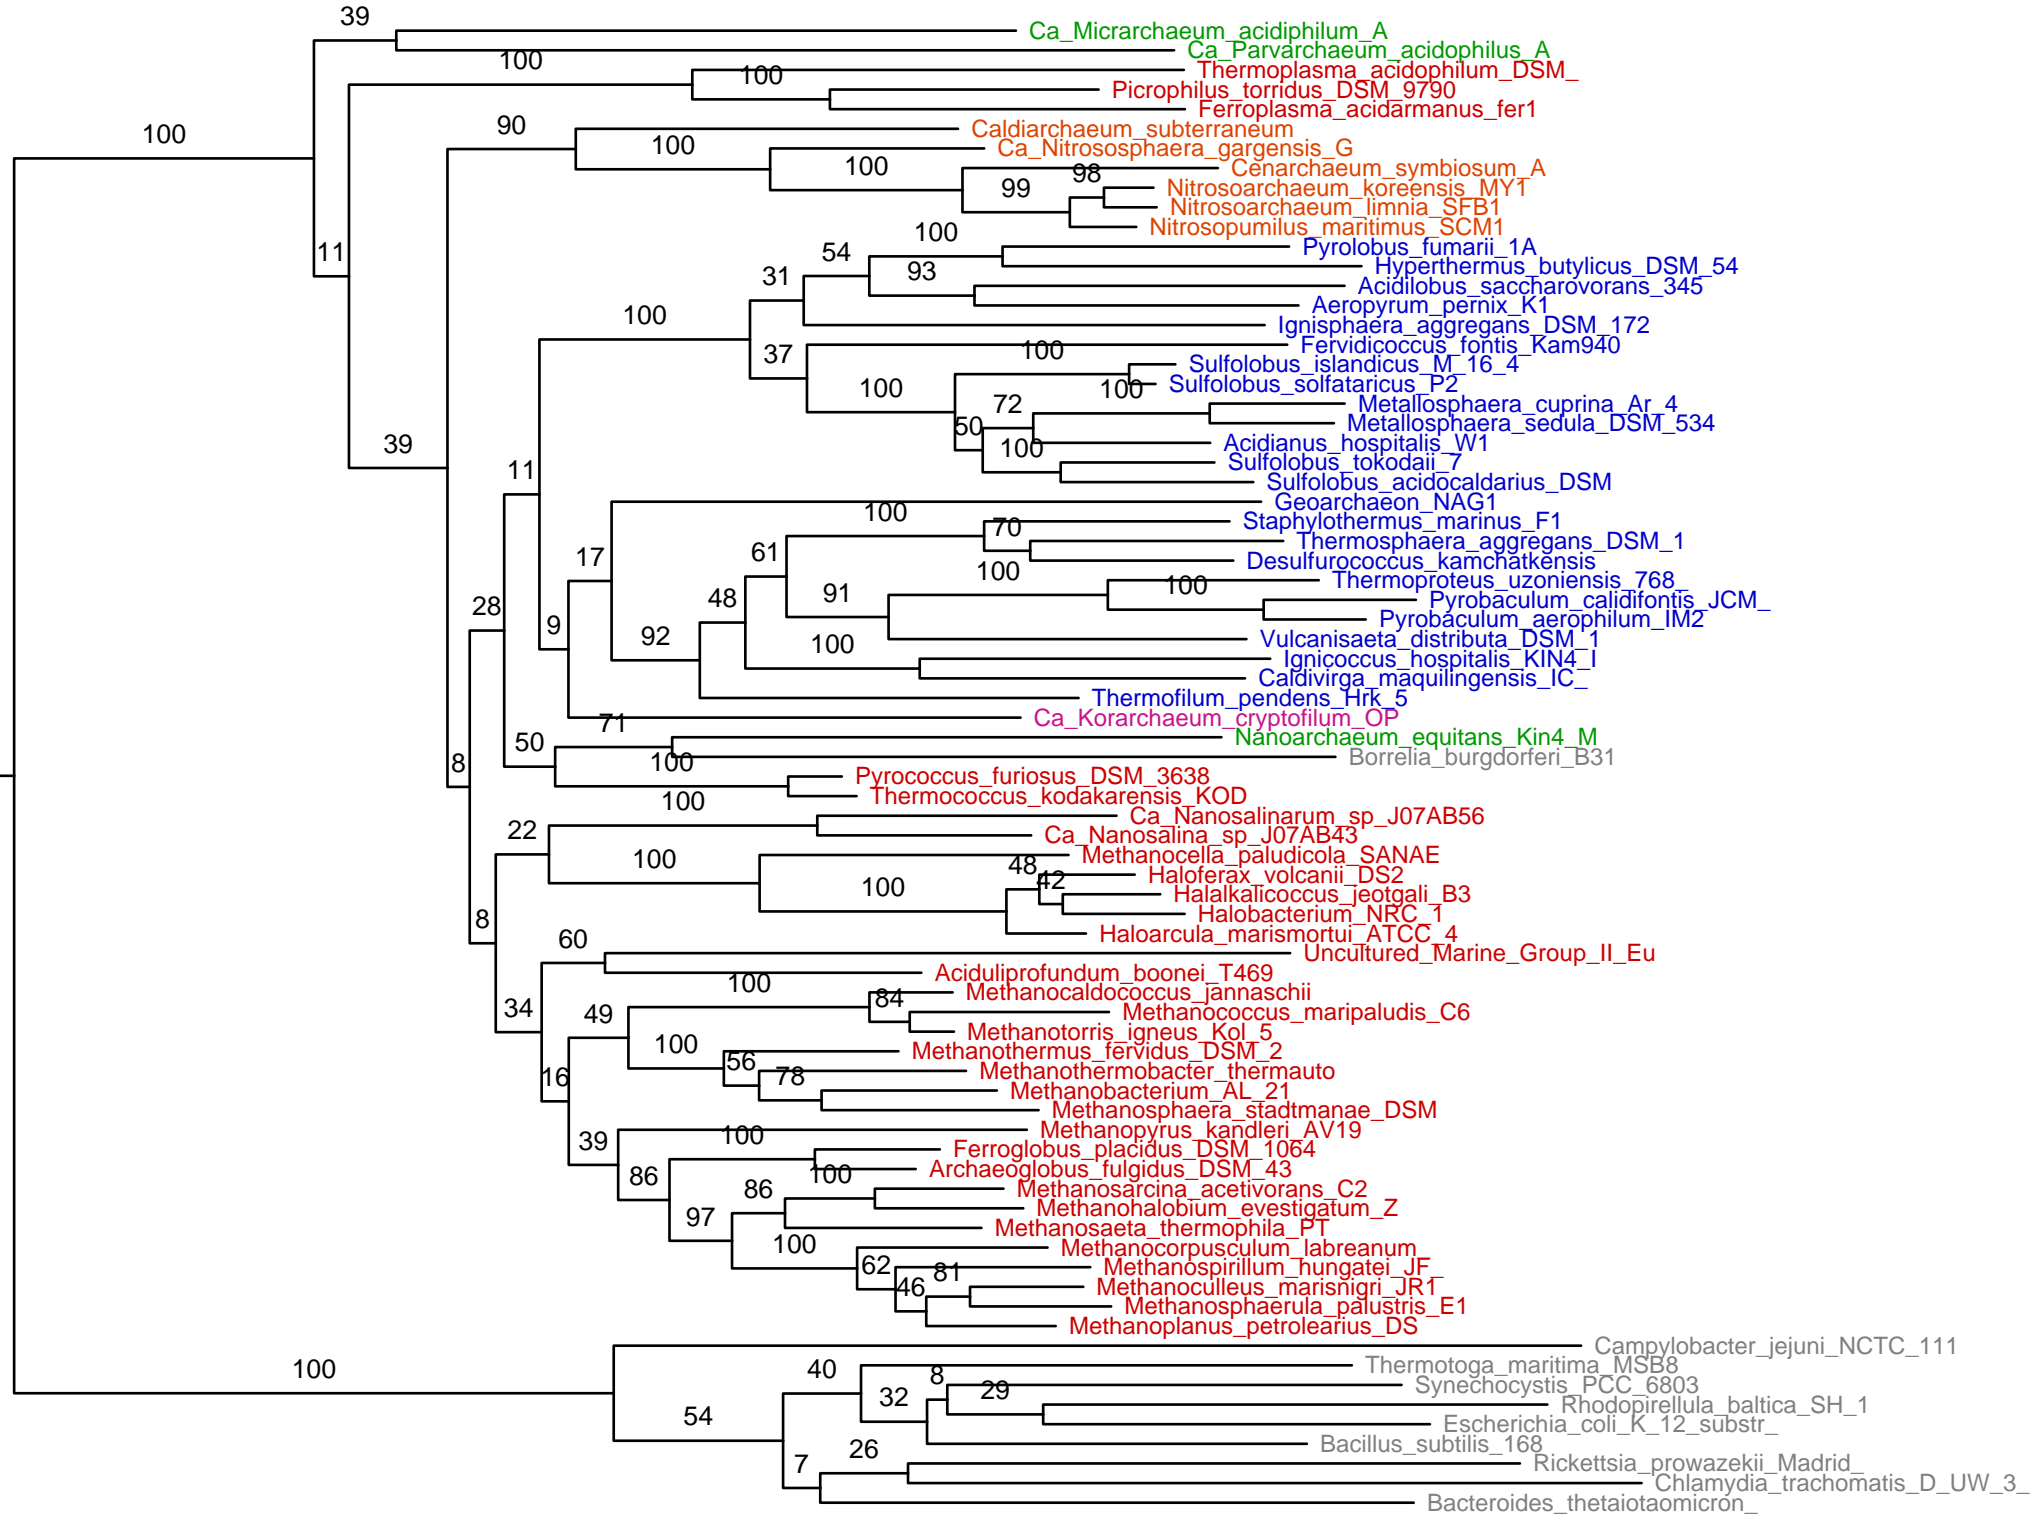

0.5

ML phylogeny of arCOG00412: Phenylalanyl-tRNA synthetase beta subunit



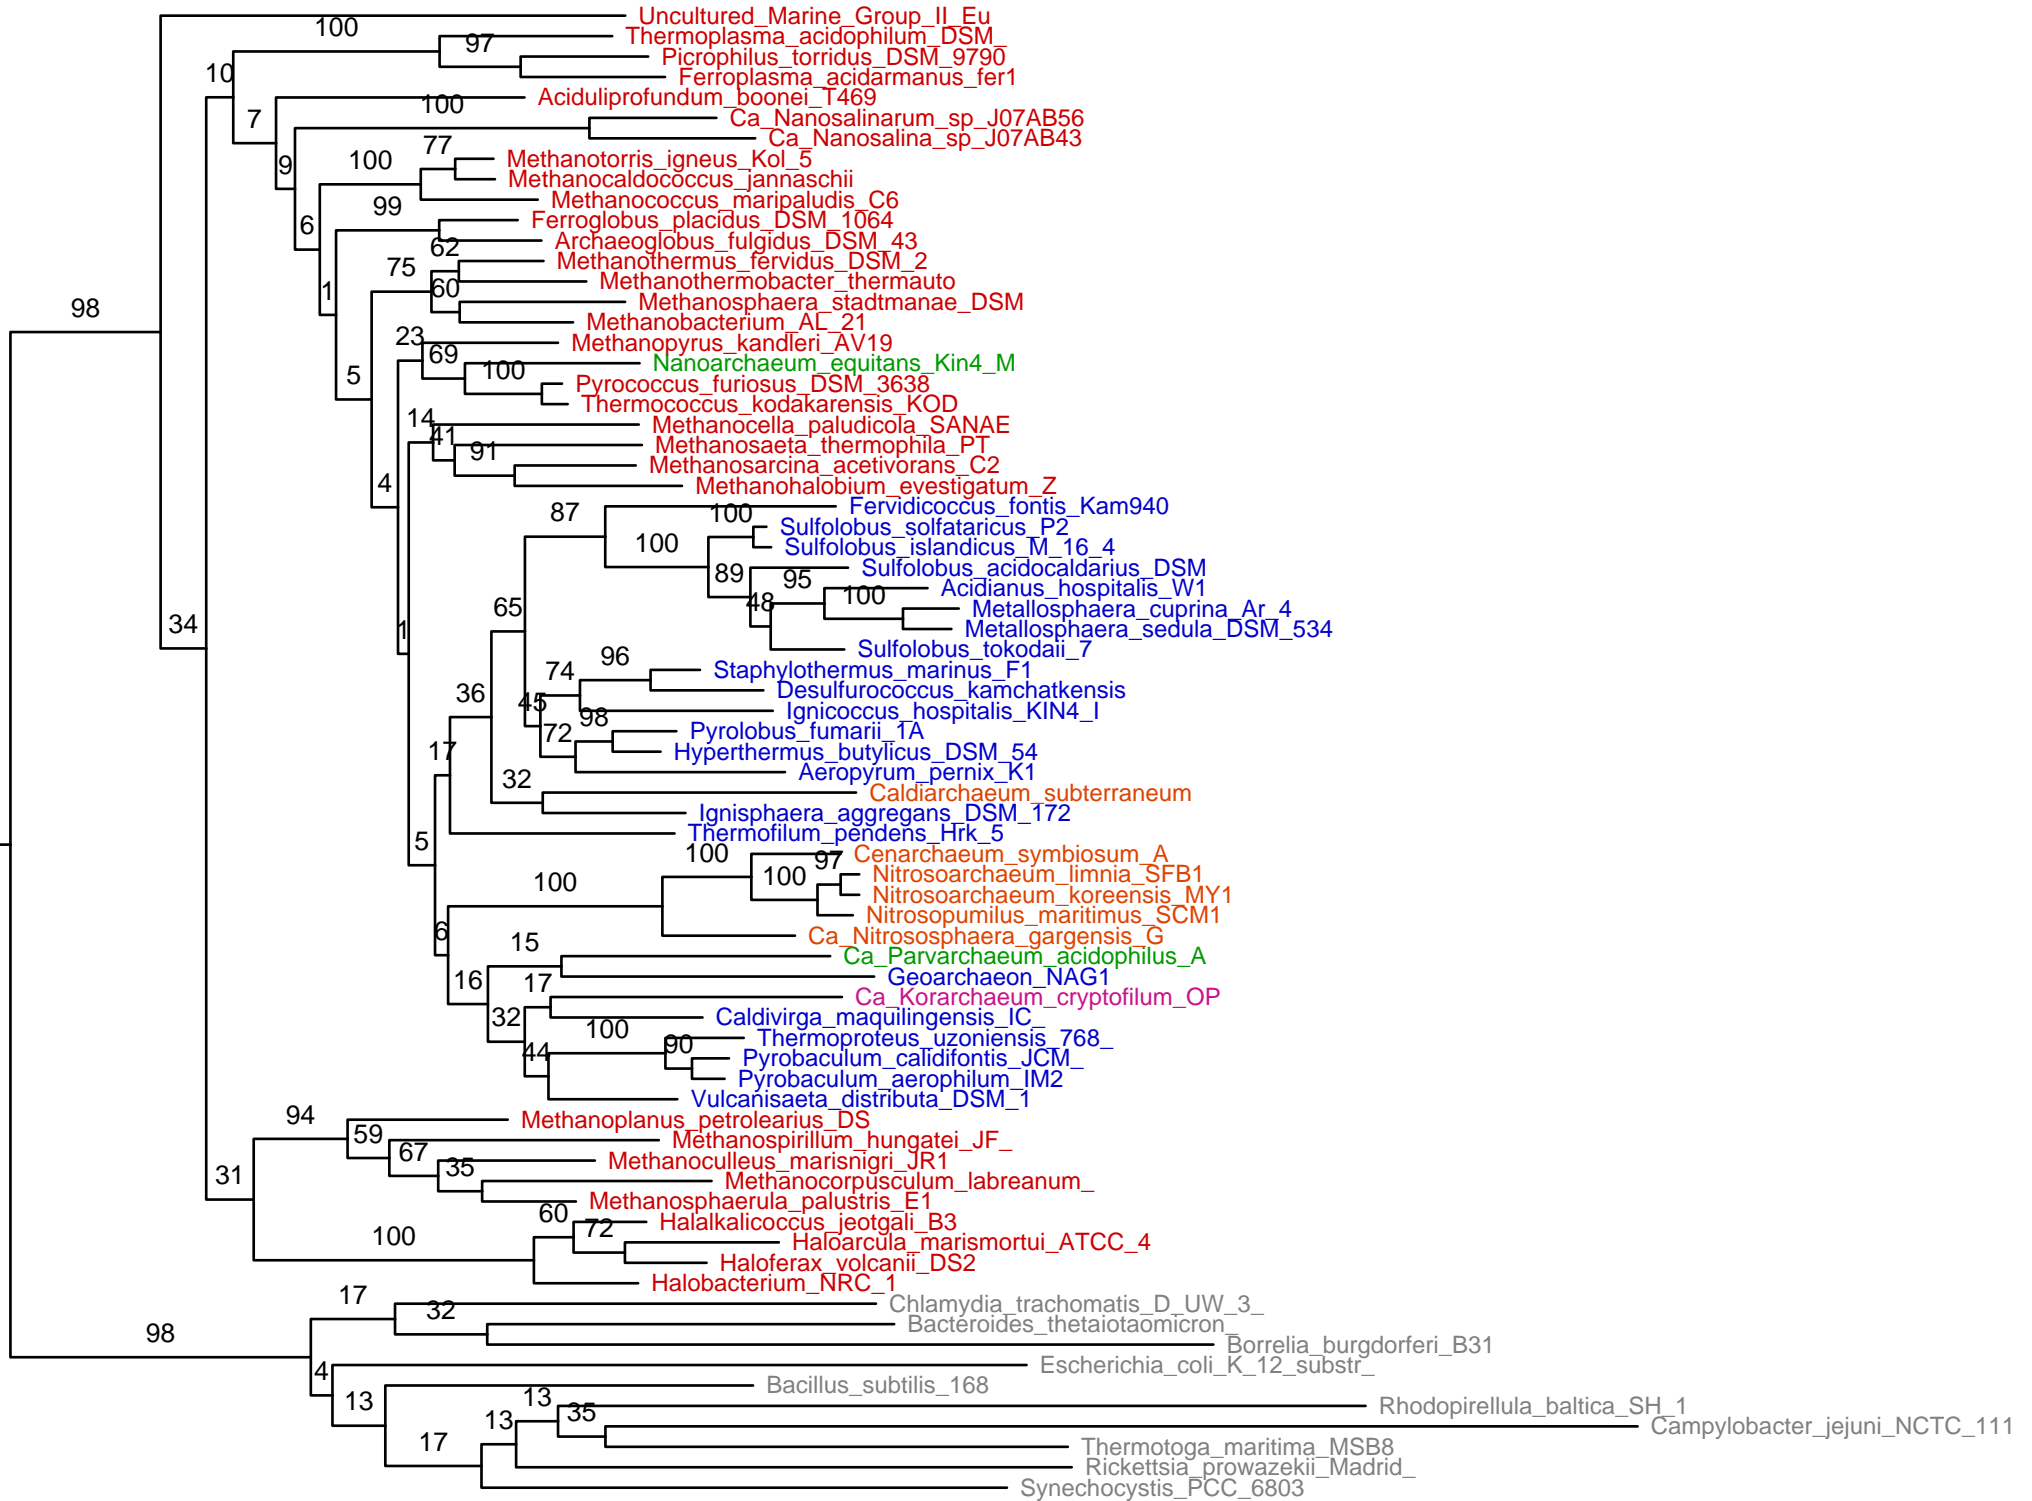

0.5

ML phylogeny of arCOG00987: Pseudouridine synthase

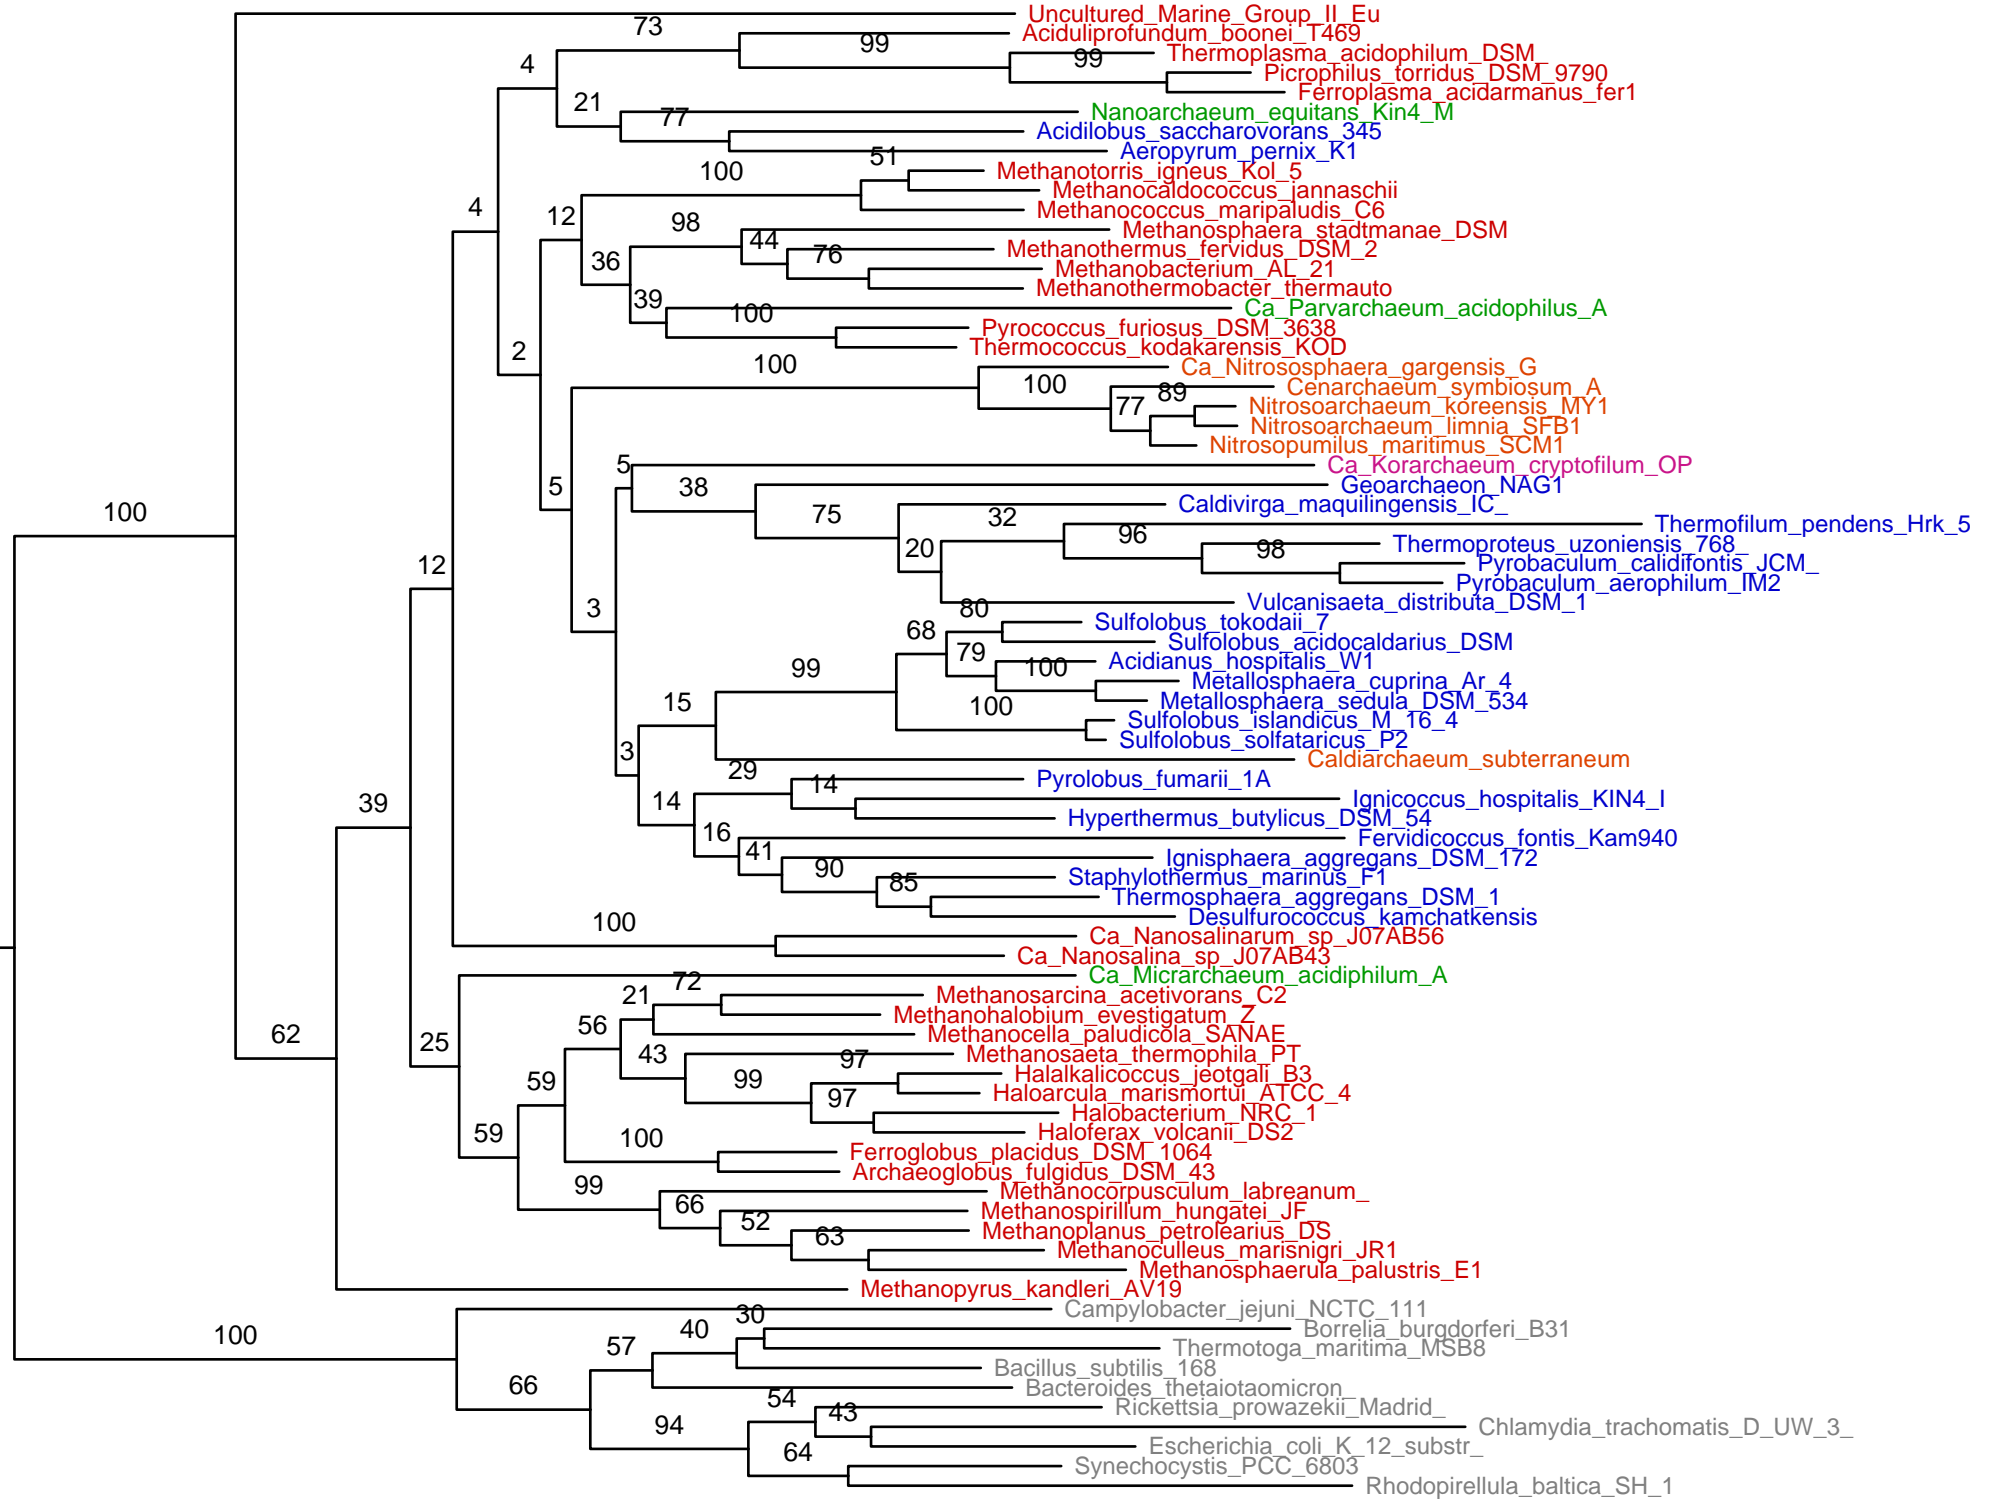

0.3

ML phylogeny of arCOG01001: Methionine aminopeptidase







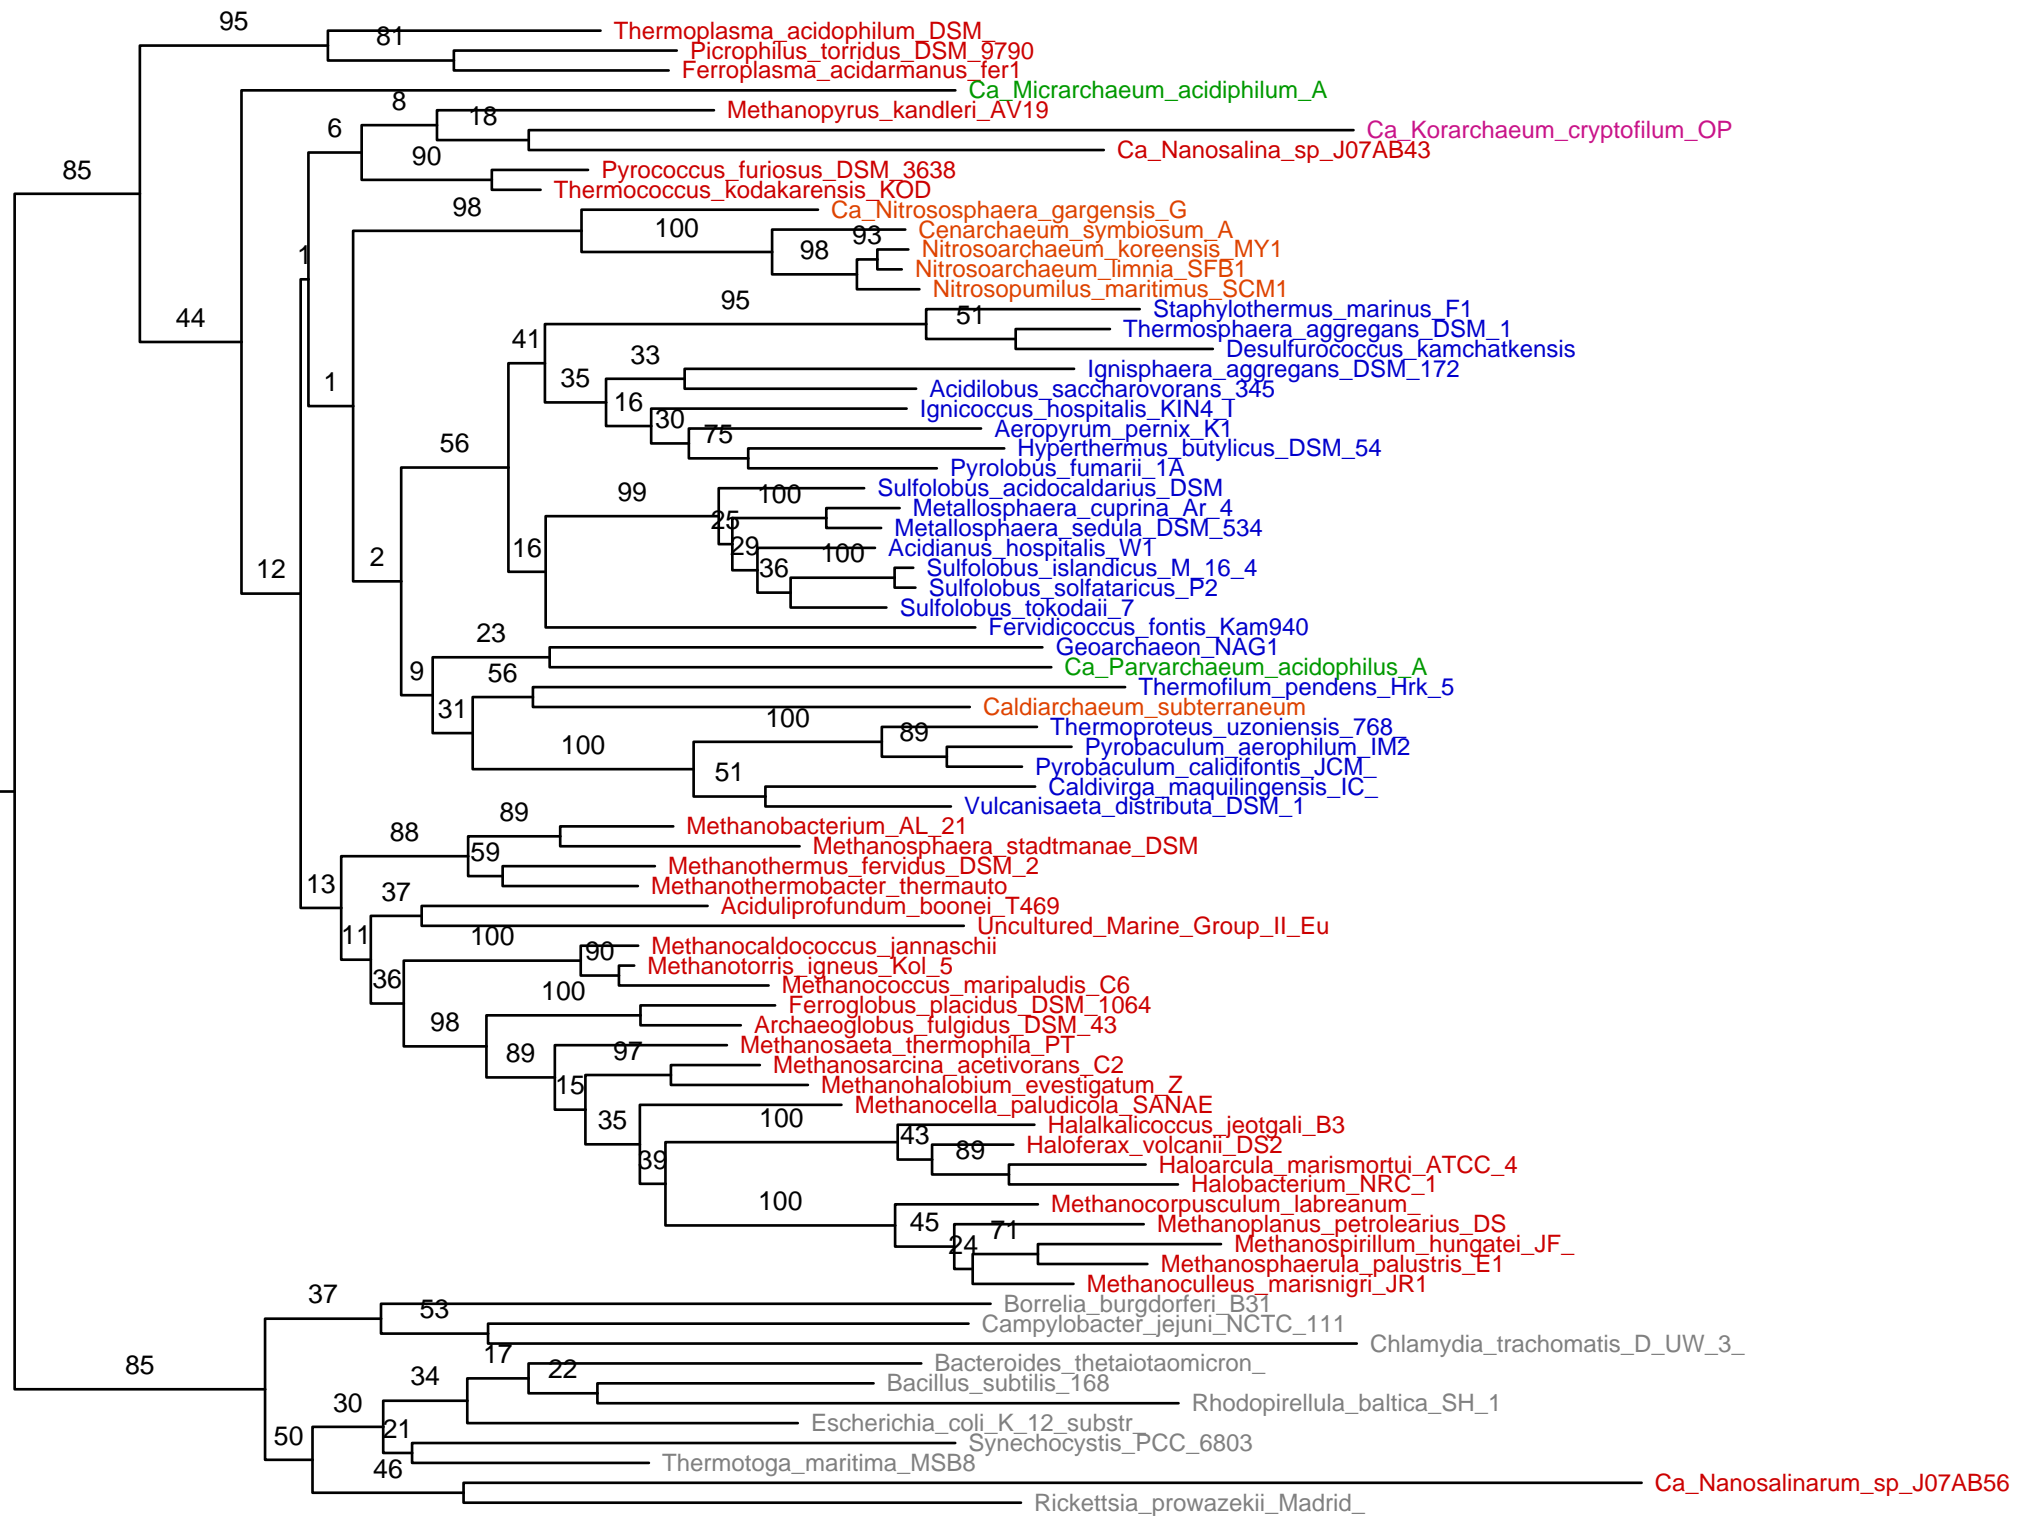

0.4

ML phylogeny of arCOG01227: Signal recognition particle GTPase

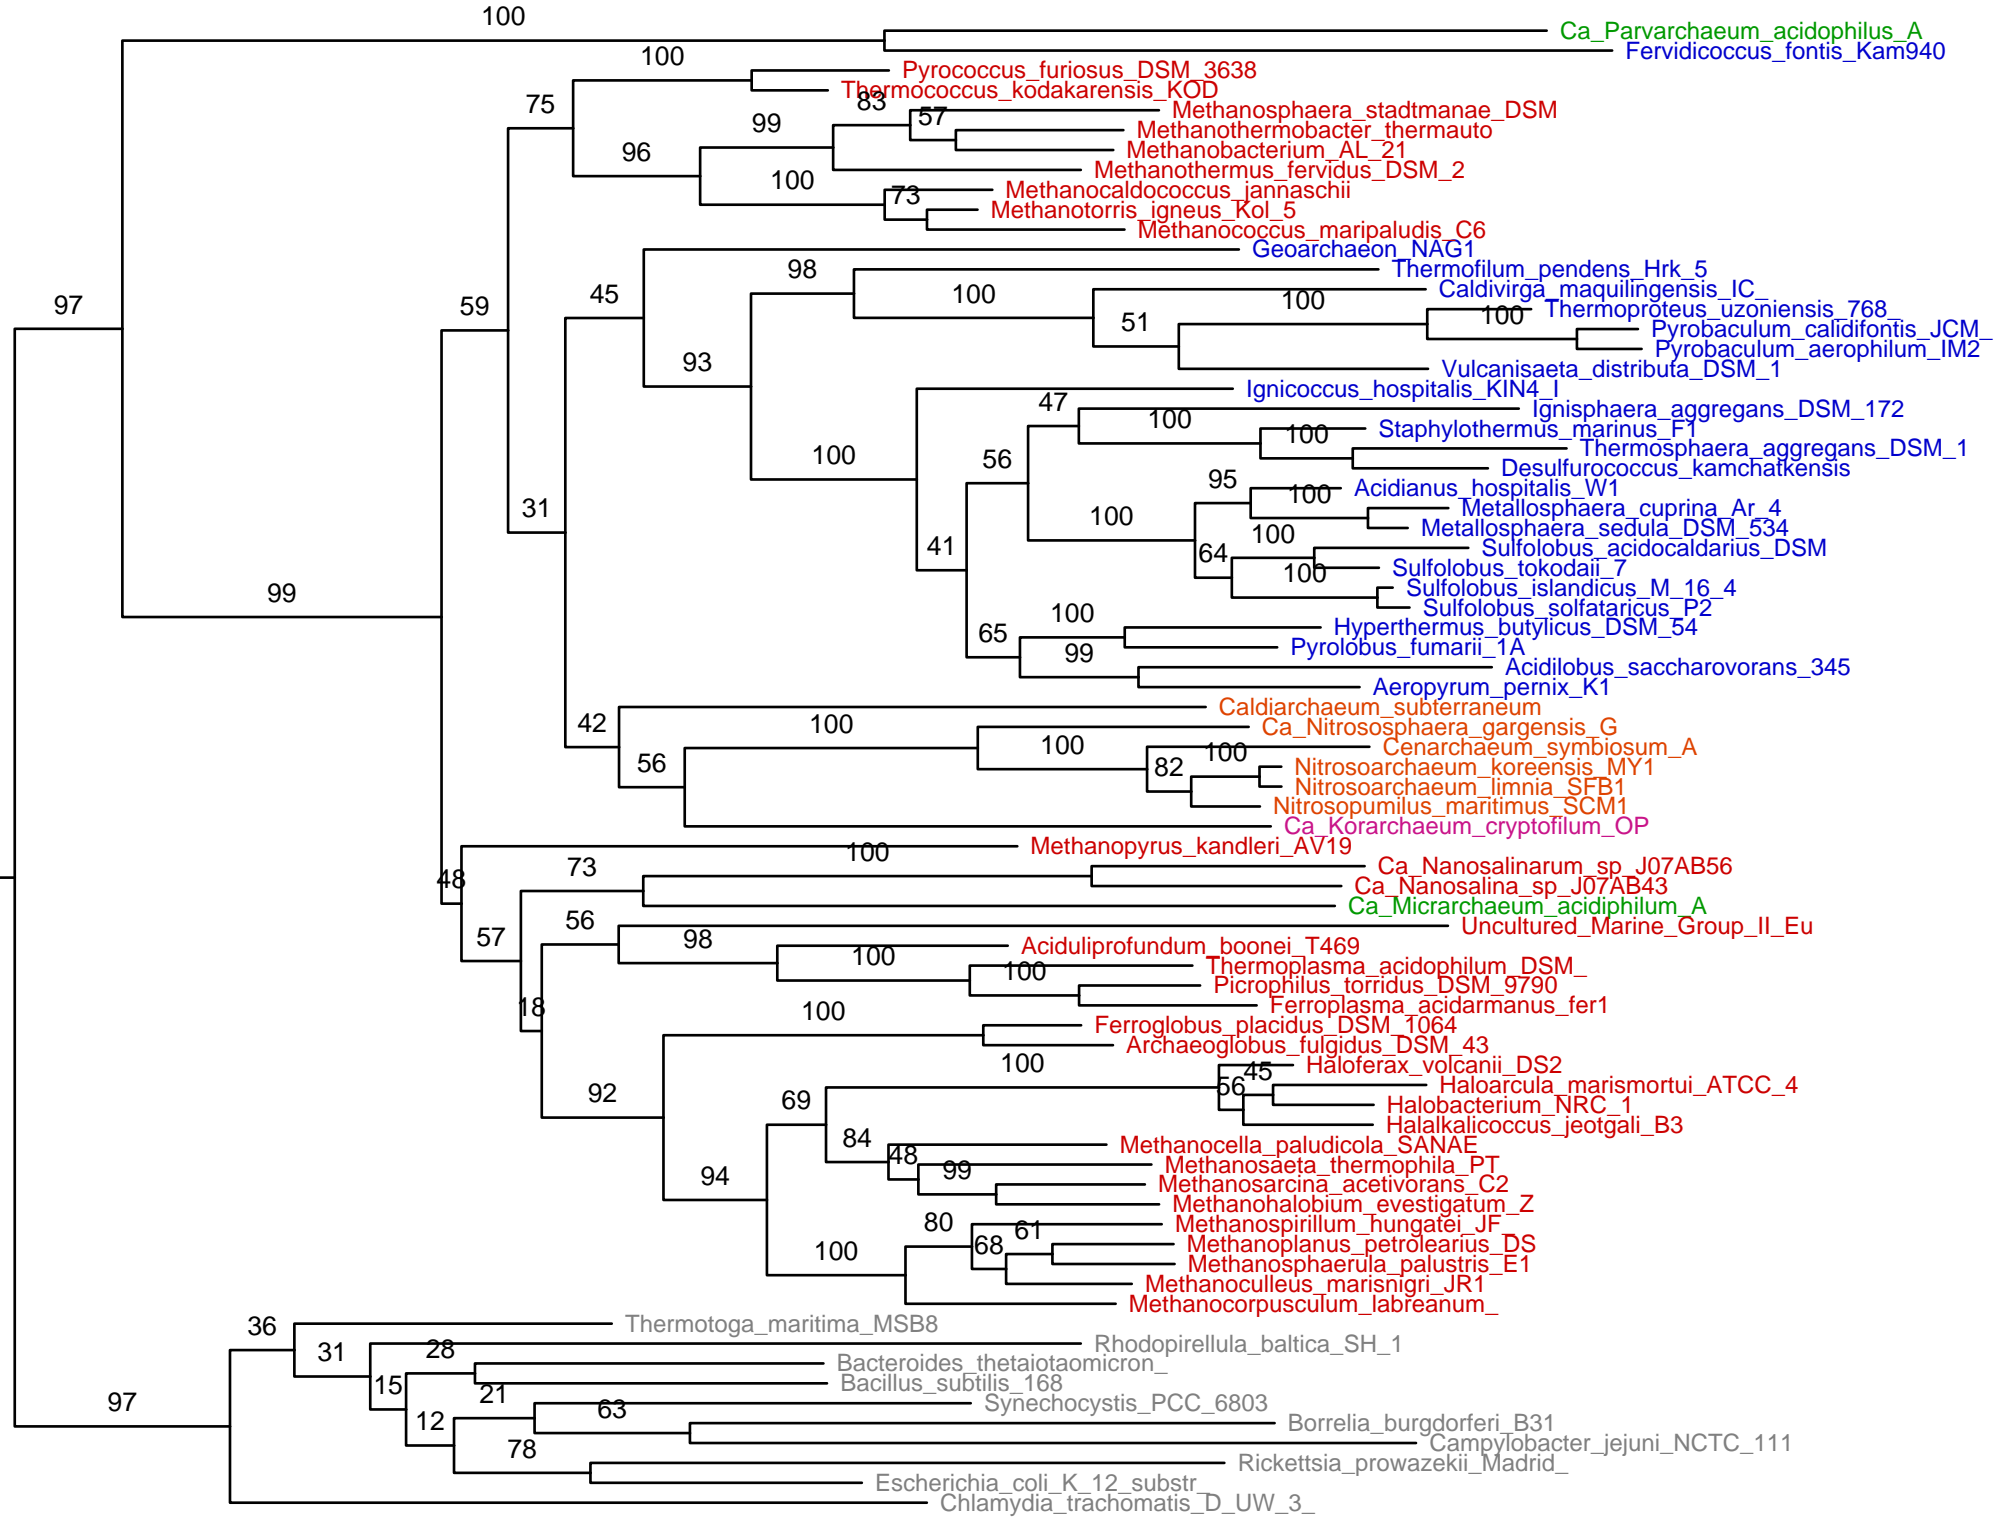

ML phylogeny of arCOG01228: Signal recognition particle GTPase







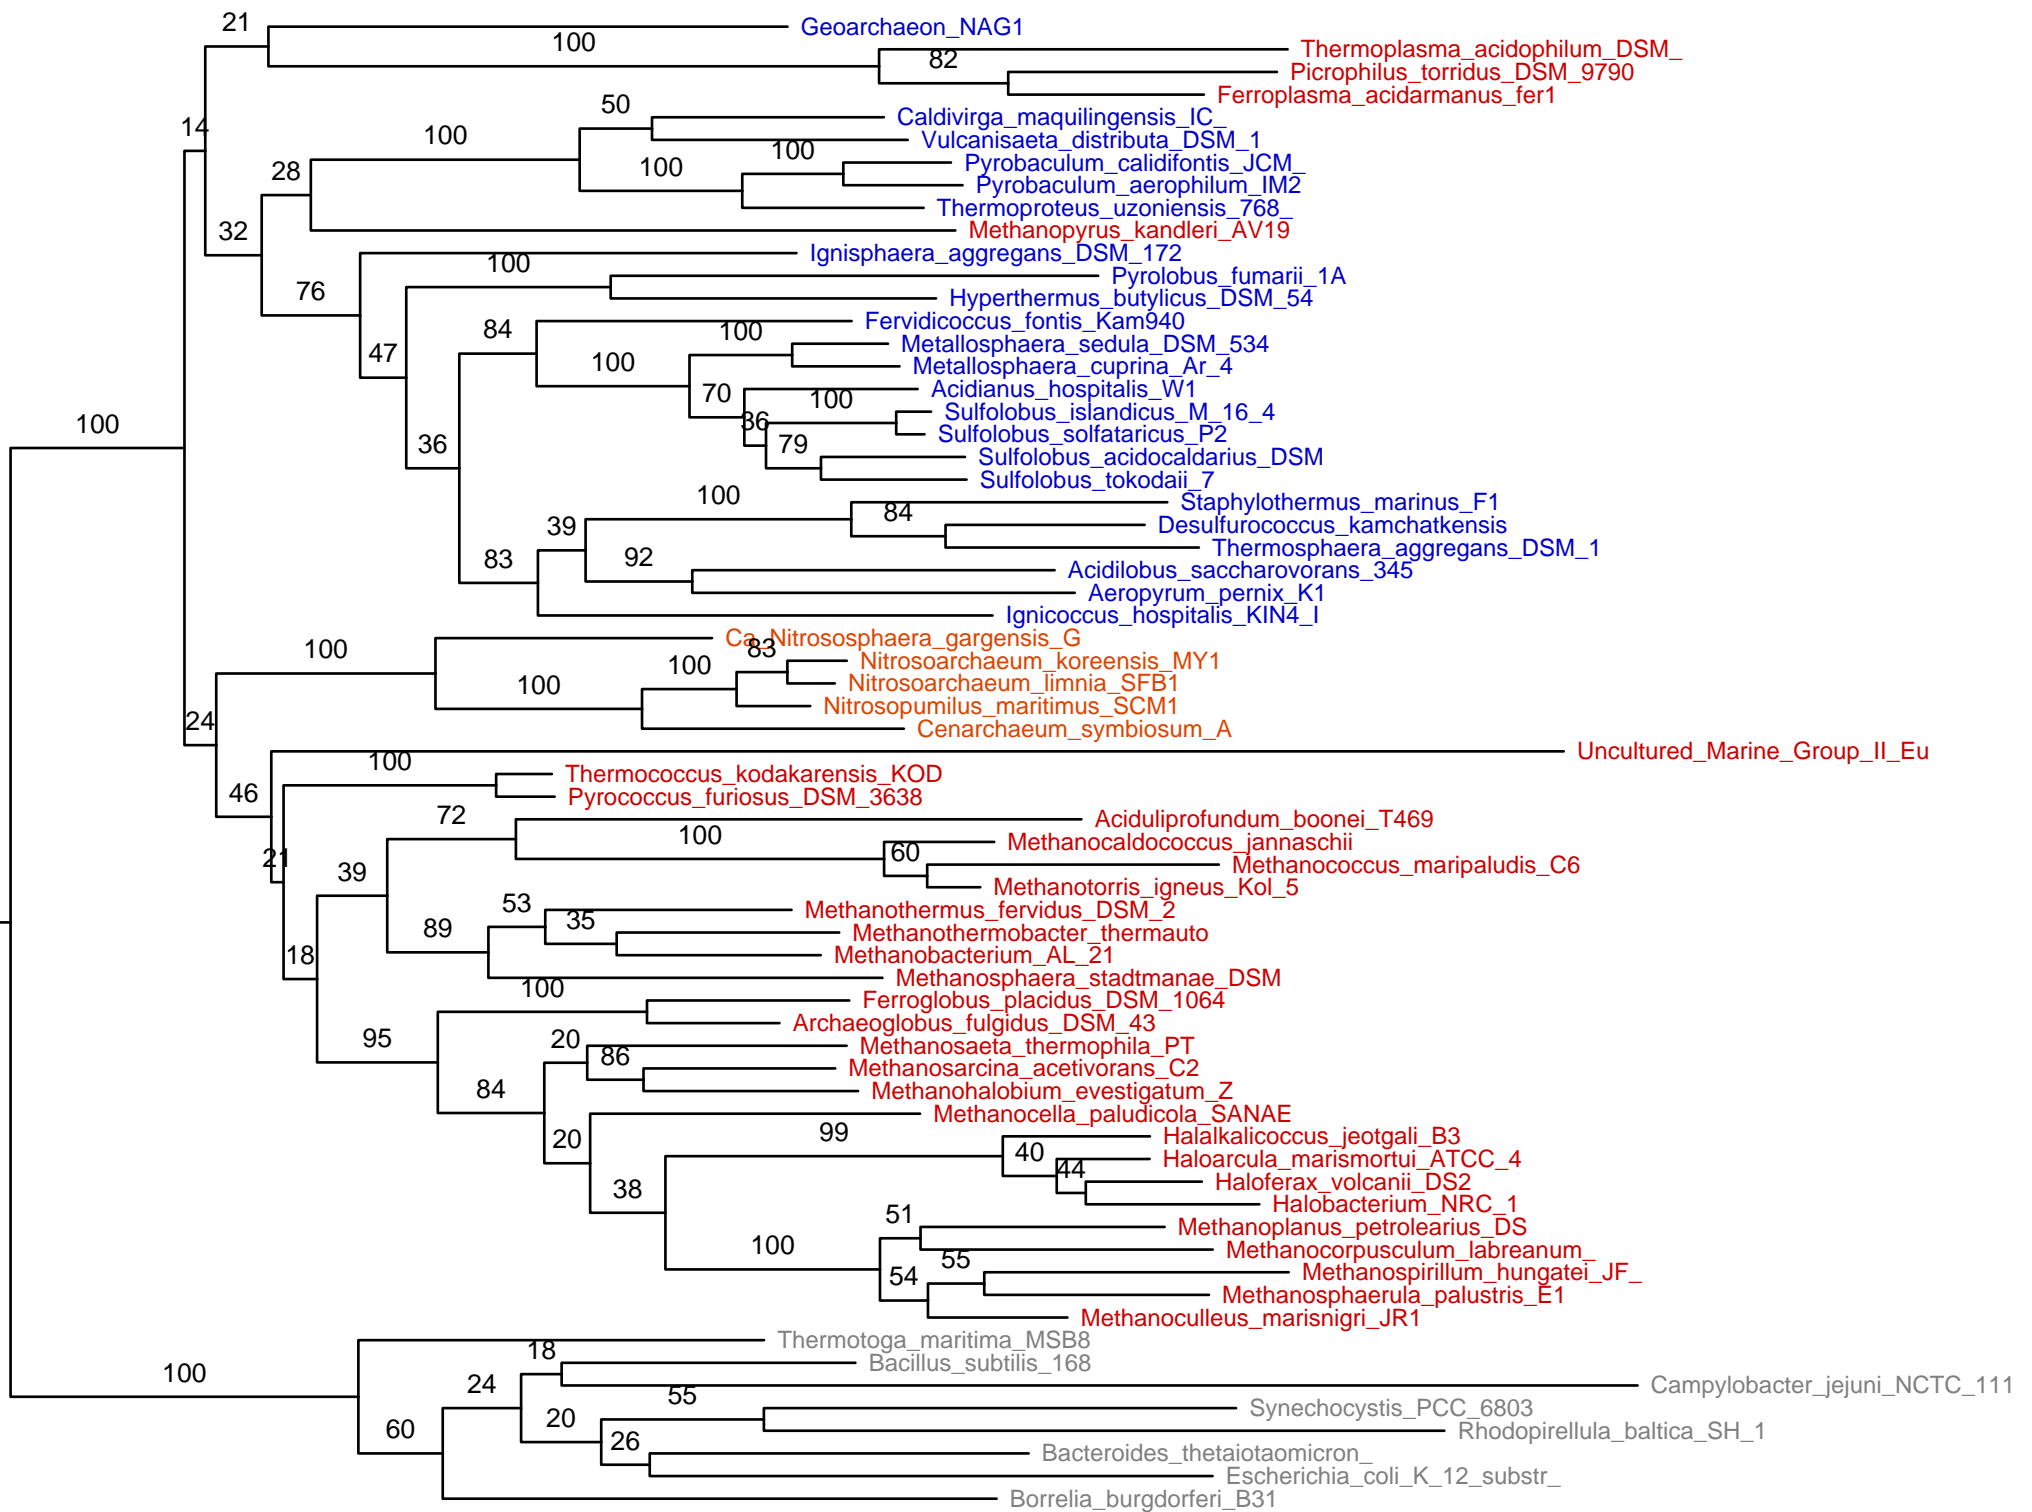

0.4

ML phylogeny of arCOG01704: Phosphopantothenoylcysteine synthetase/decarboxylase









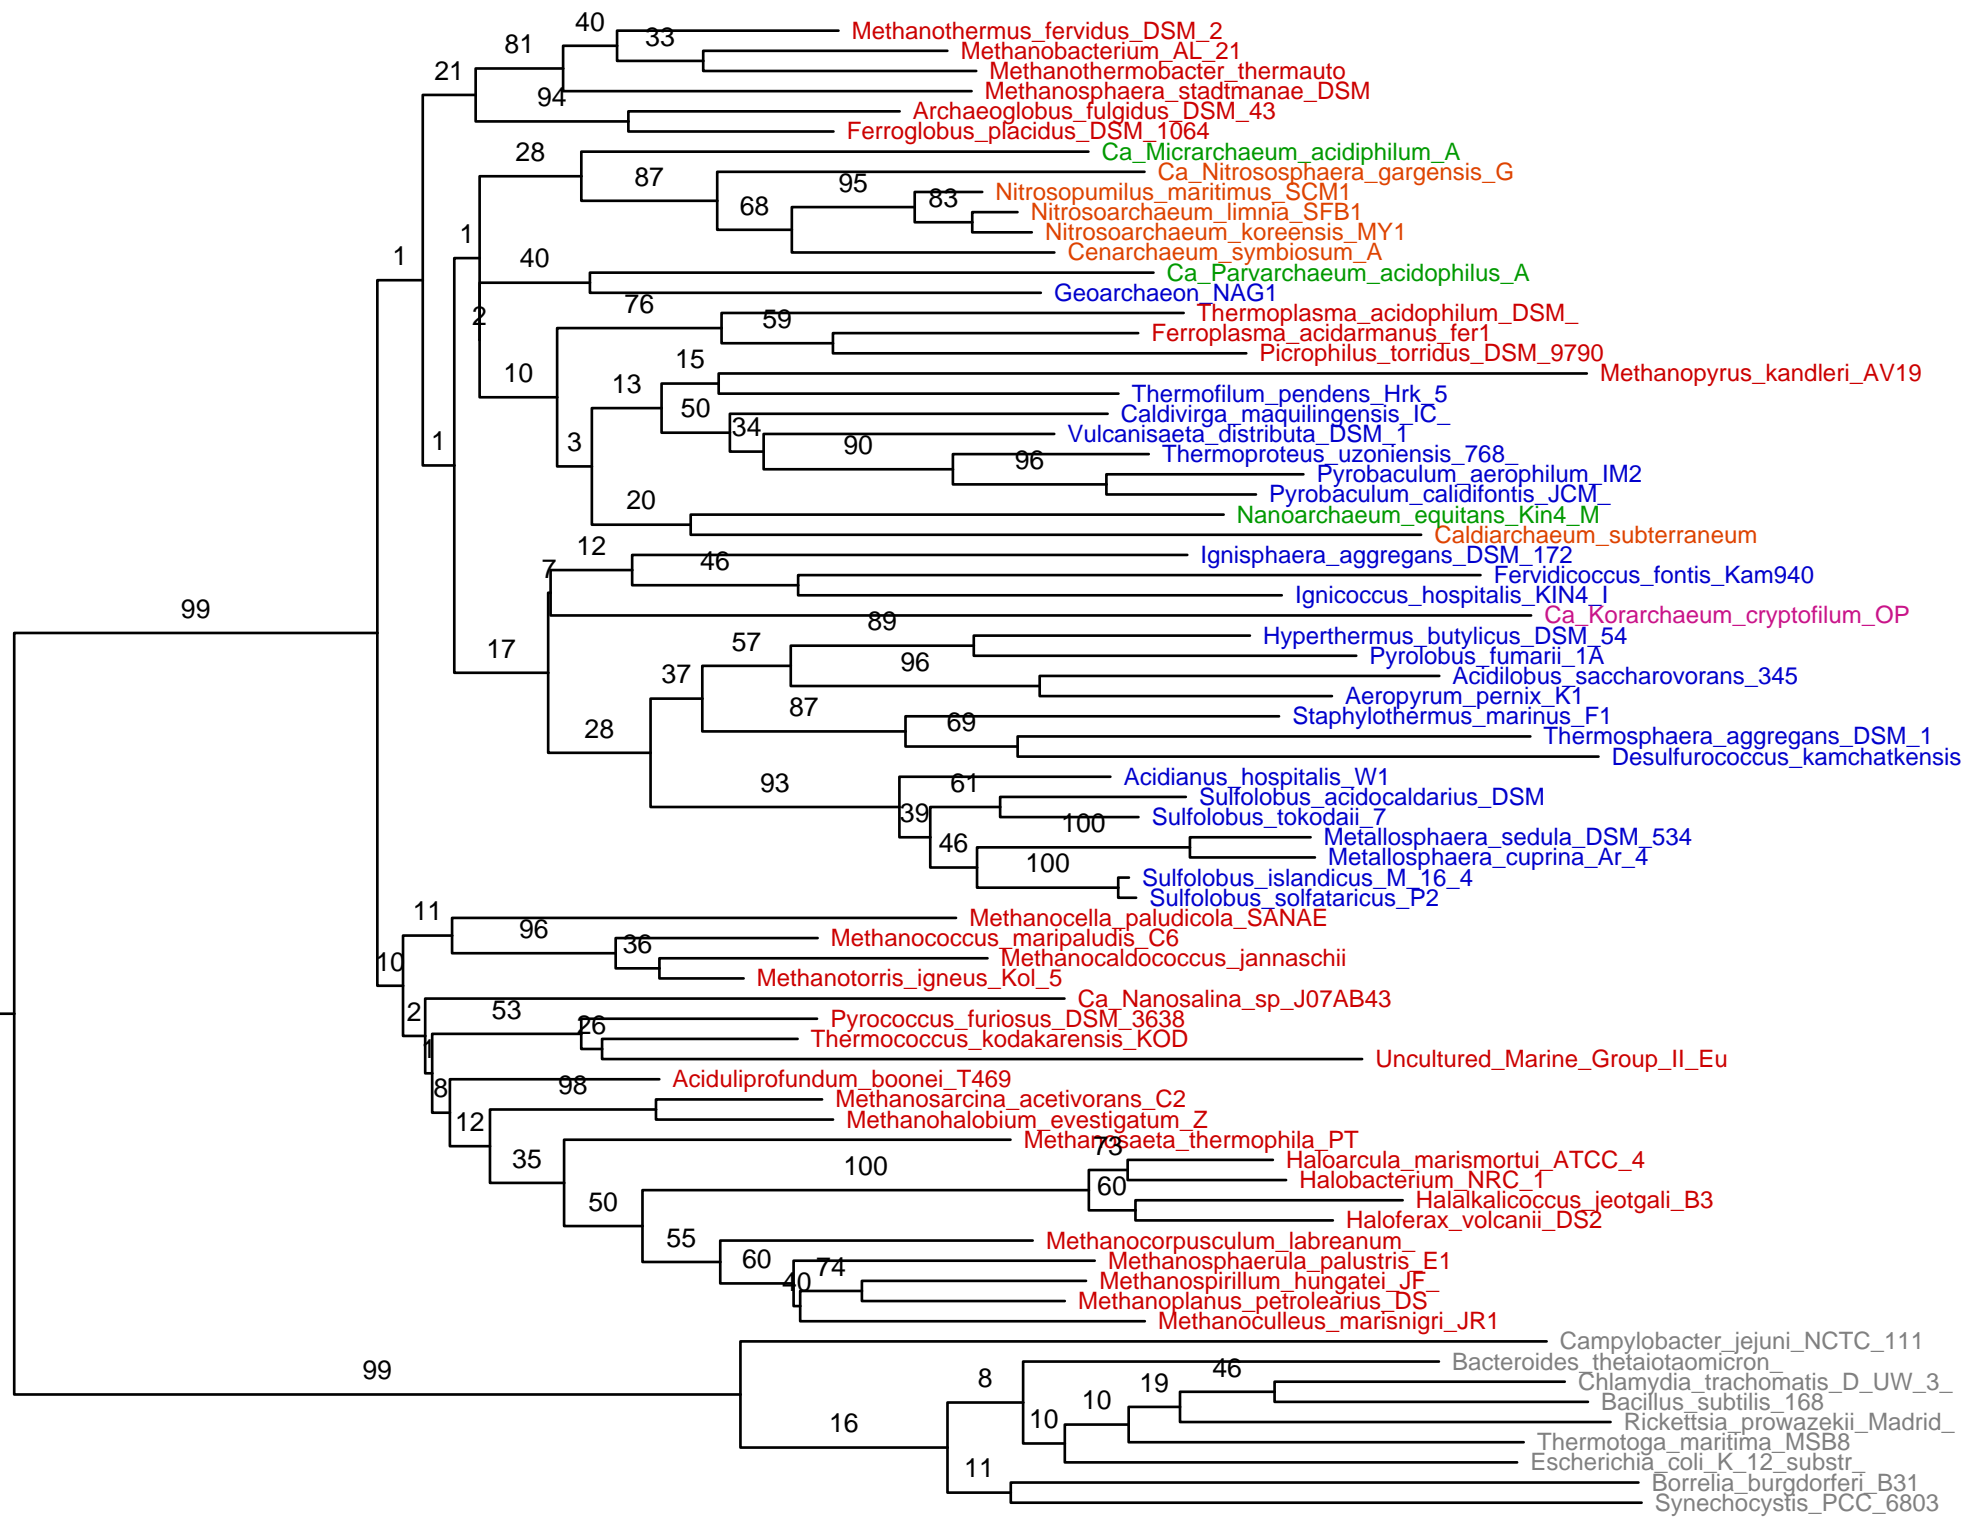

ML phylogeny of arCOG04121: Ribonuclease HII

0.3





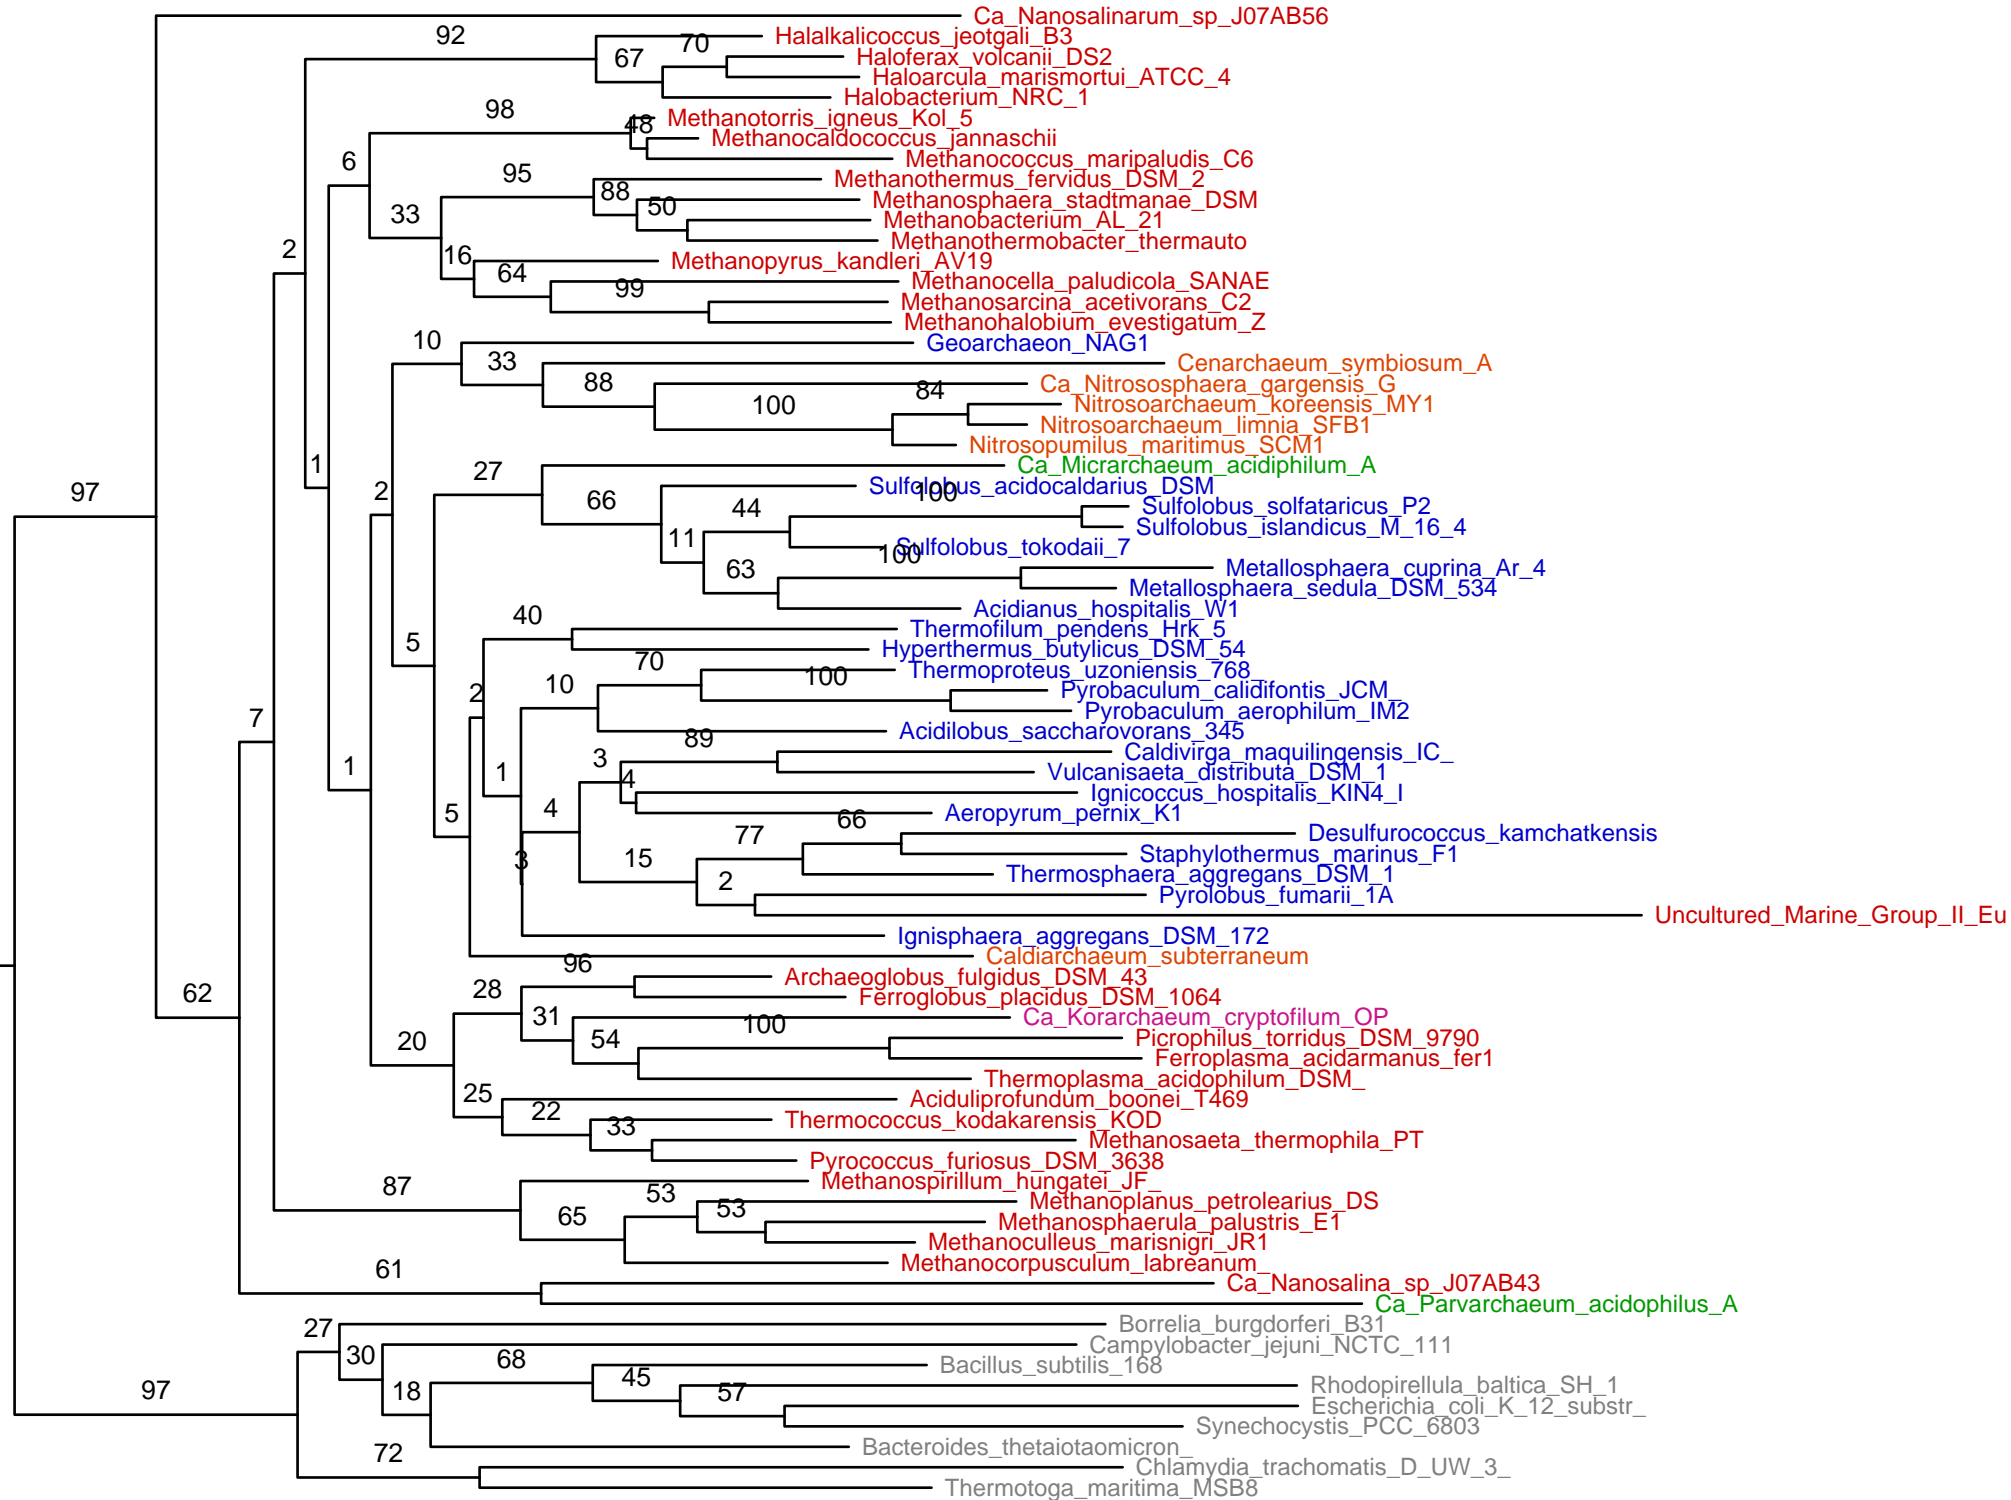

0.3

ML phylogeny of arCOG04184: Xanthosine triphosphate pyrophosphatase

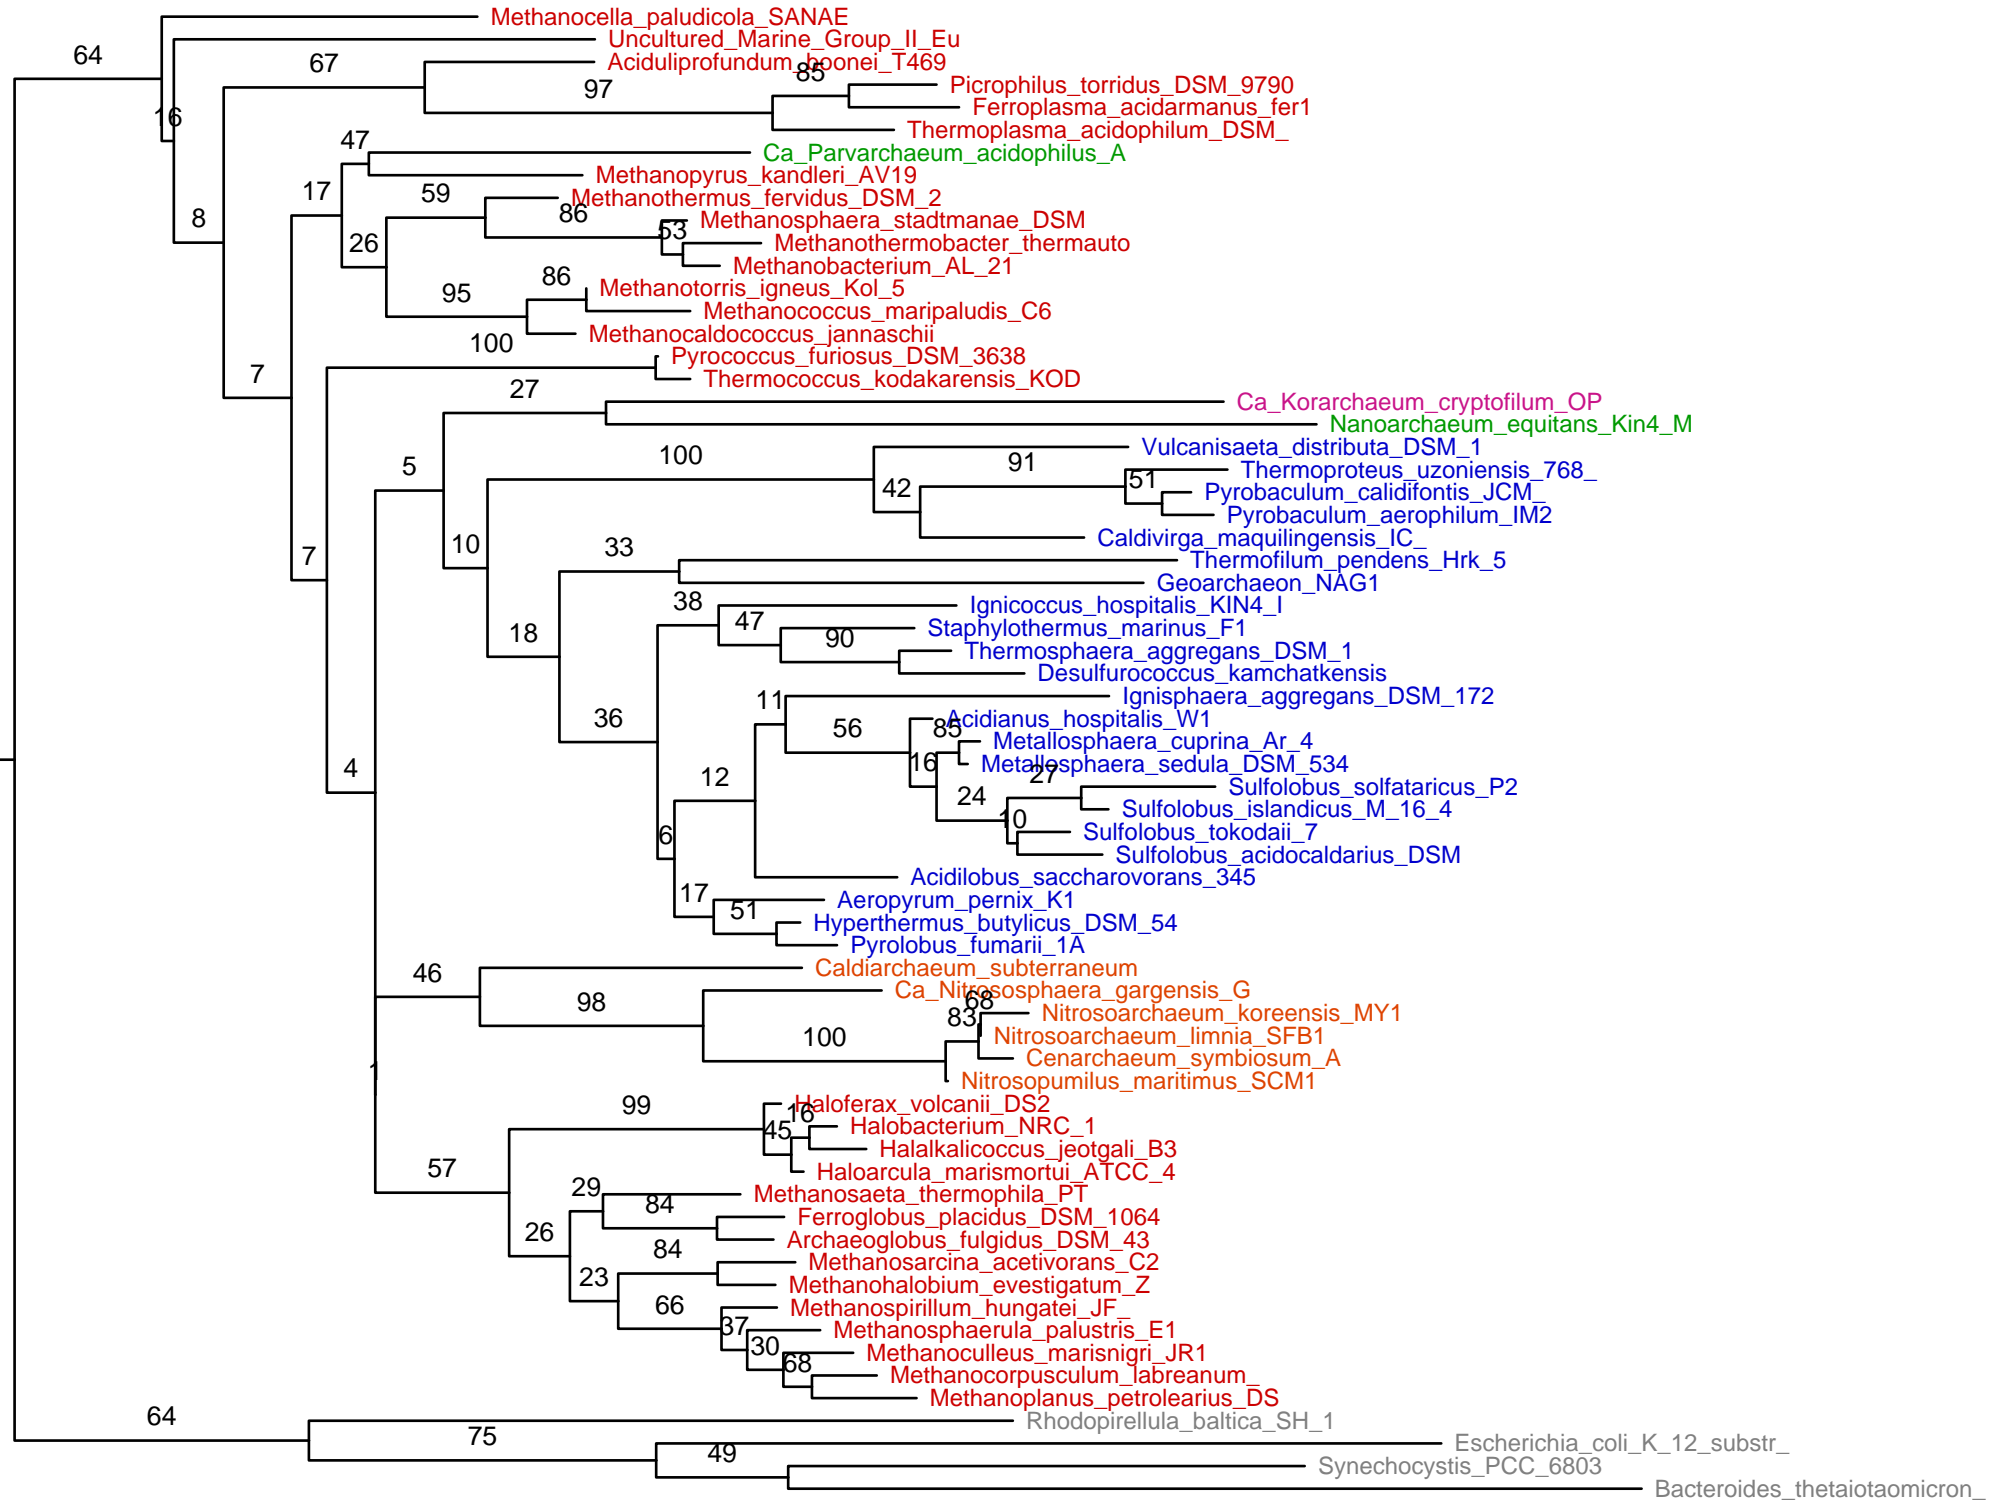

0.4

ML phylogeny of arCOG04223: Translation initiation factor 1 (eIF-1/SUI1)

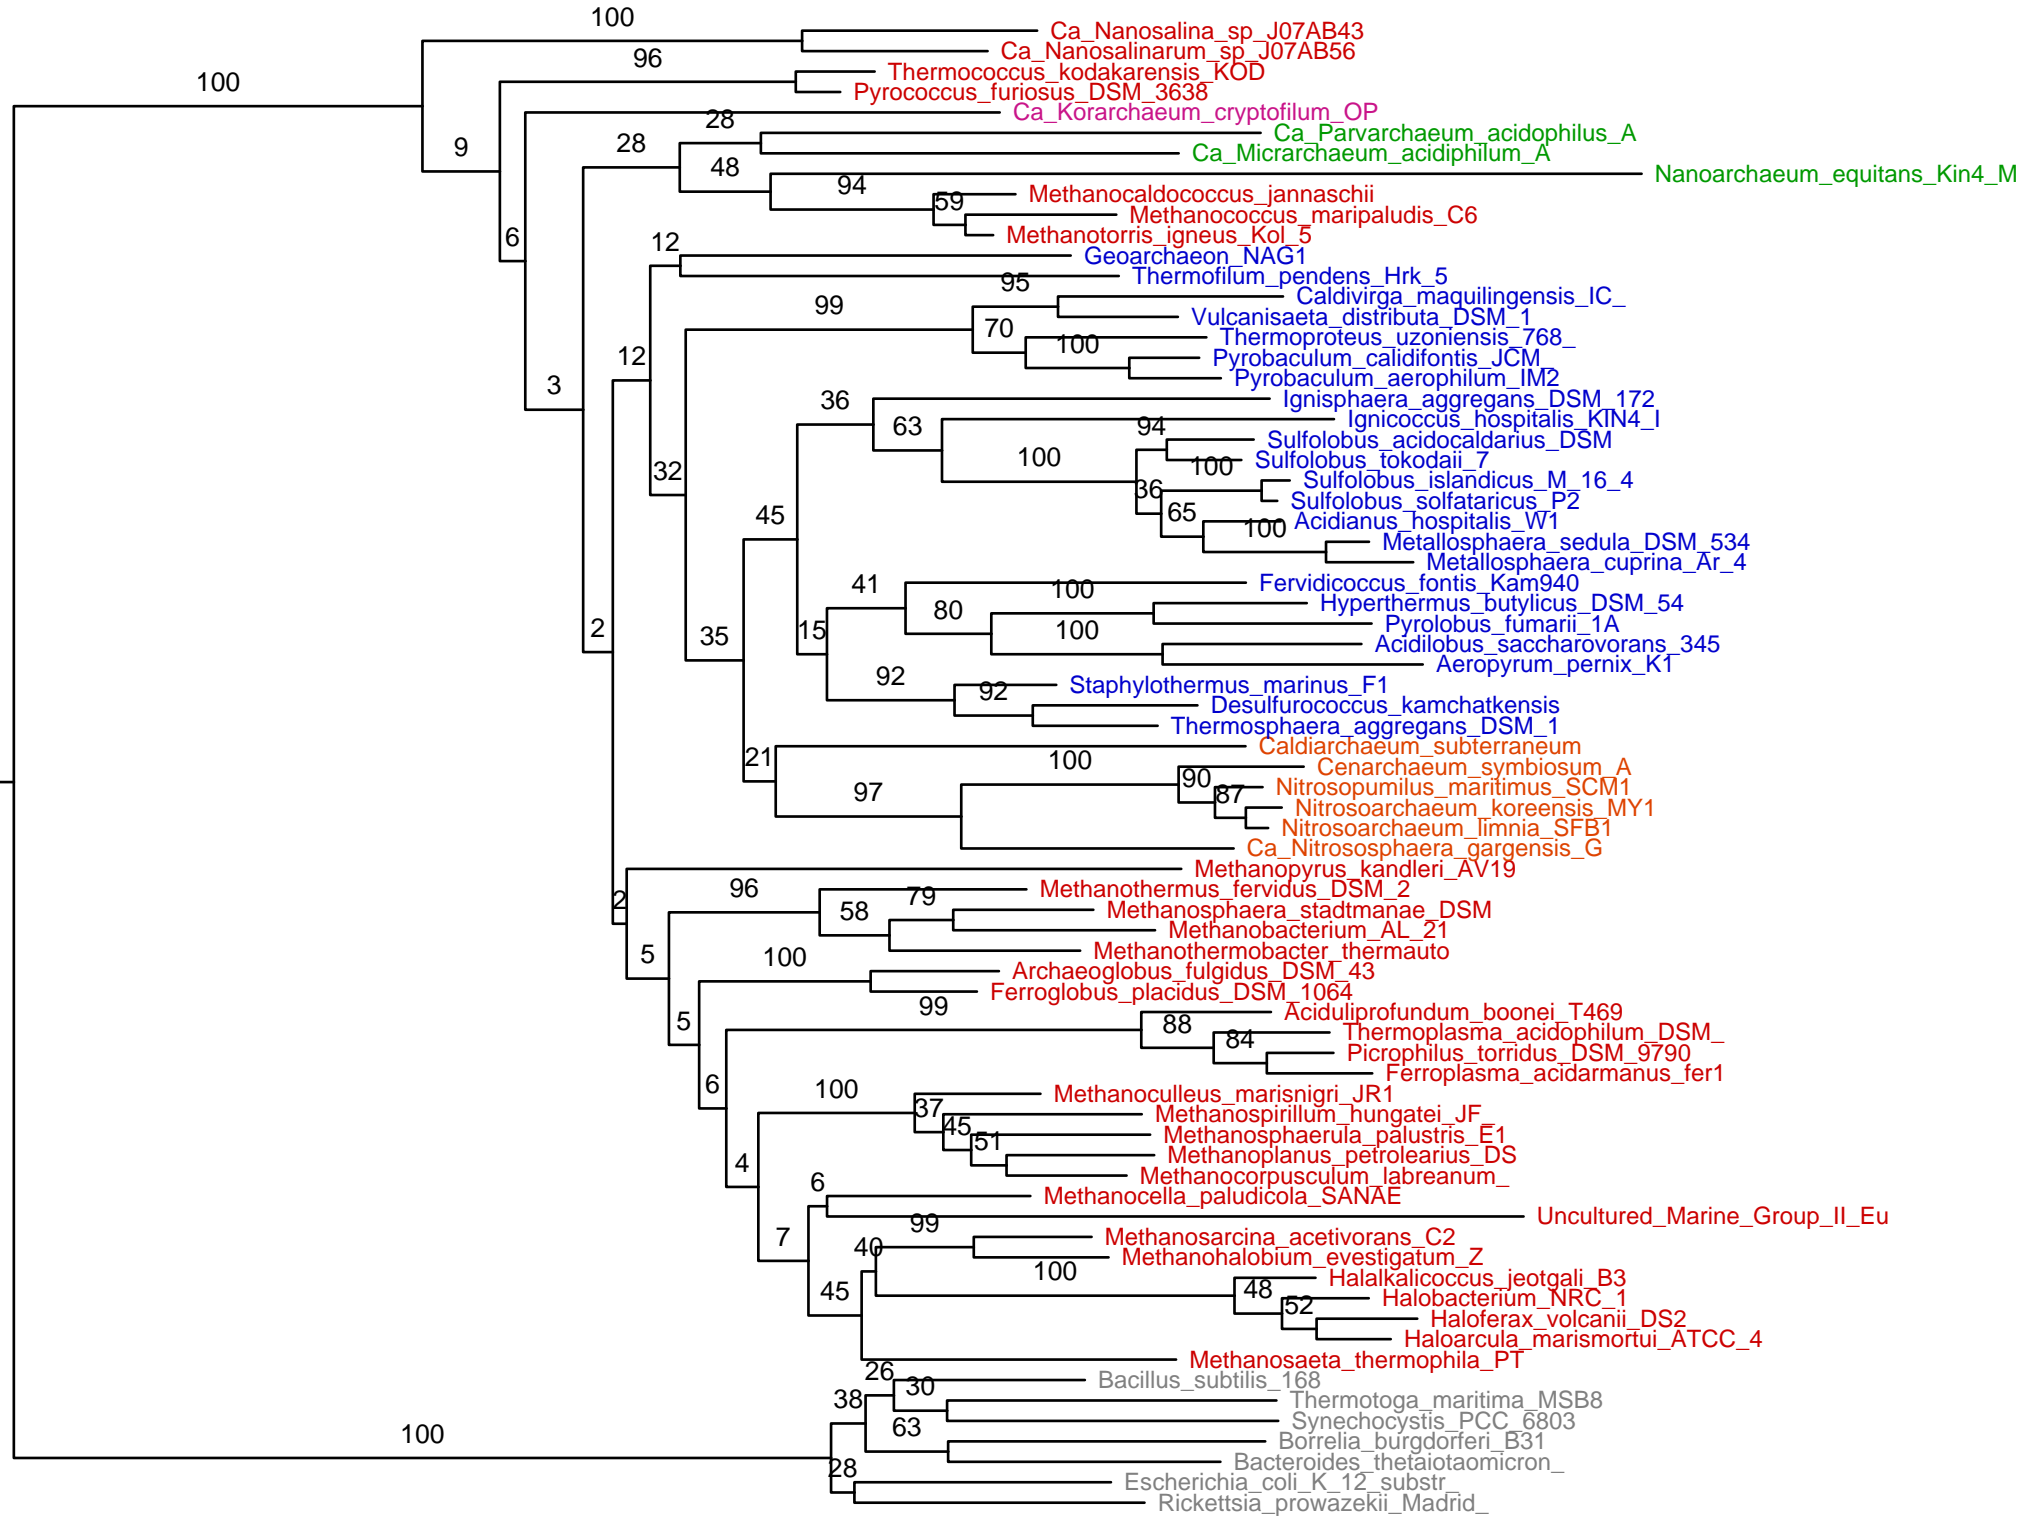

0.4

ML phylogeny of arCOG04241: DNA-directed RNA polymerase subunit D
