# Supplementary material
Source: PubMed Central journal article supplement (PMC4069404)
Supplement: ismej20146x3.pdf [file ismej20146x3.pdf]

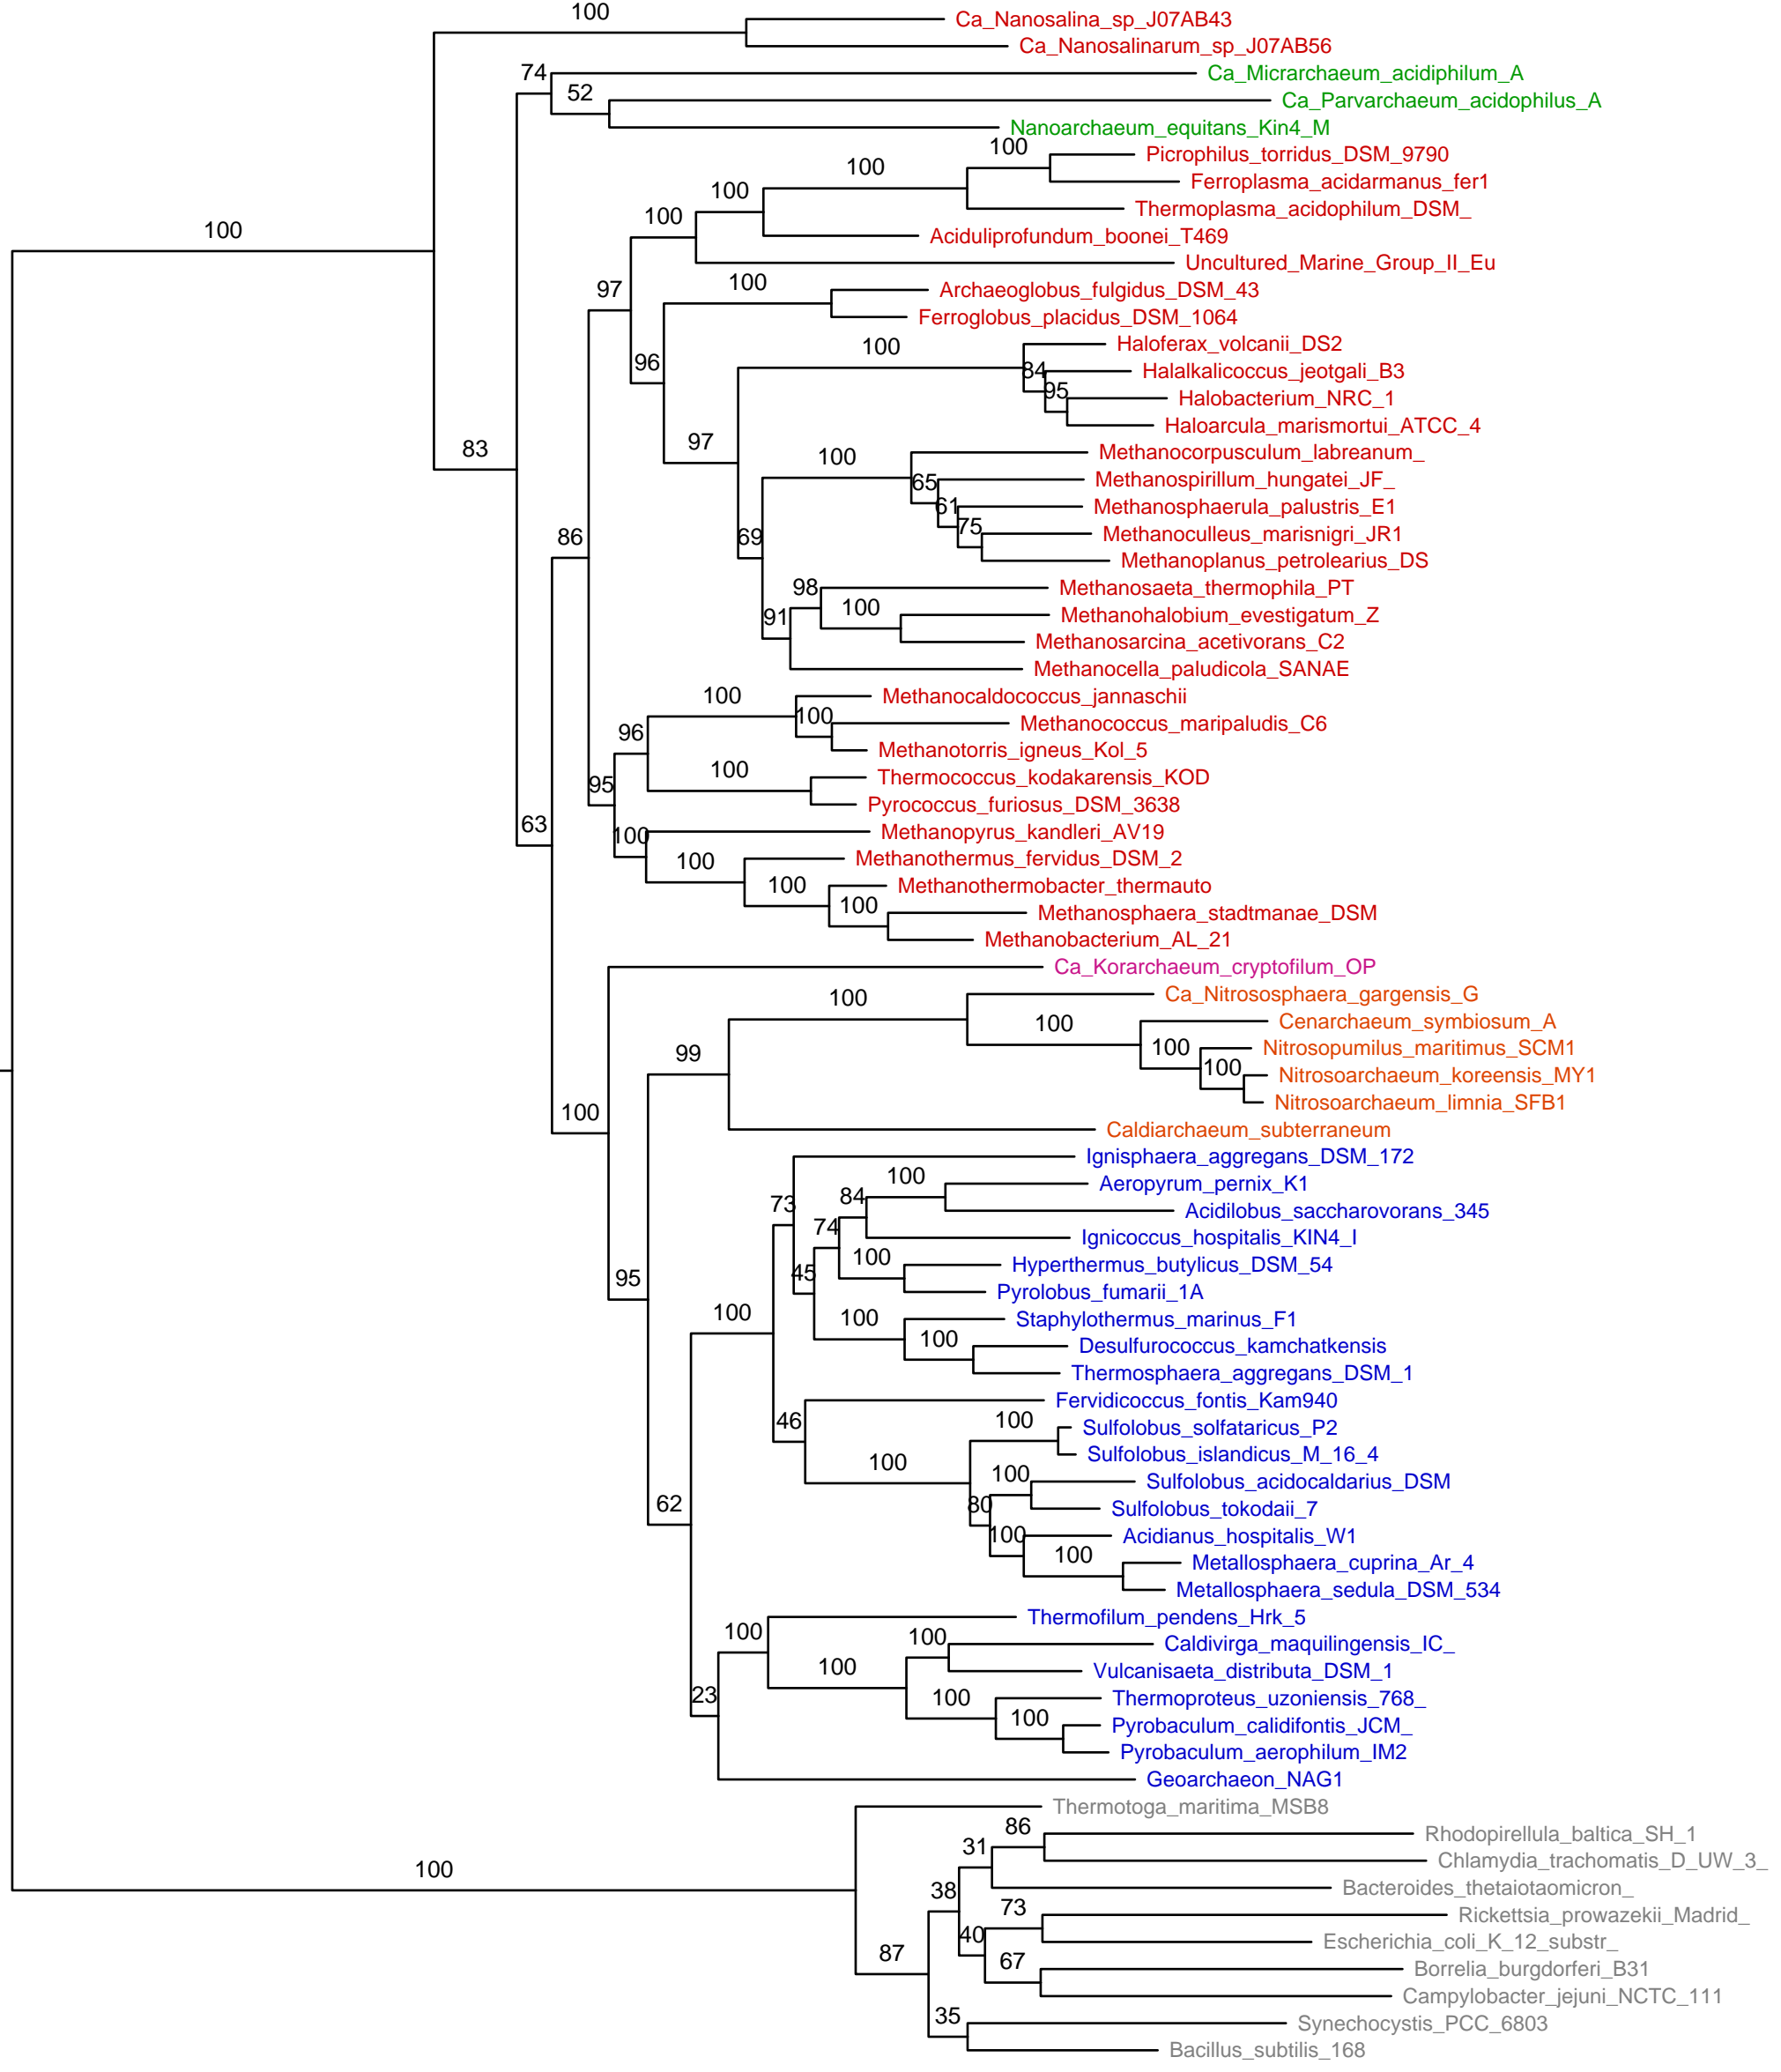

0.3

A: ML phylogeny (RAxML, CAT LG) of 33 r-proteins



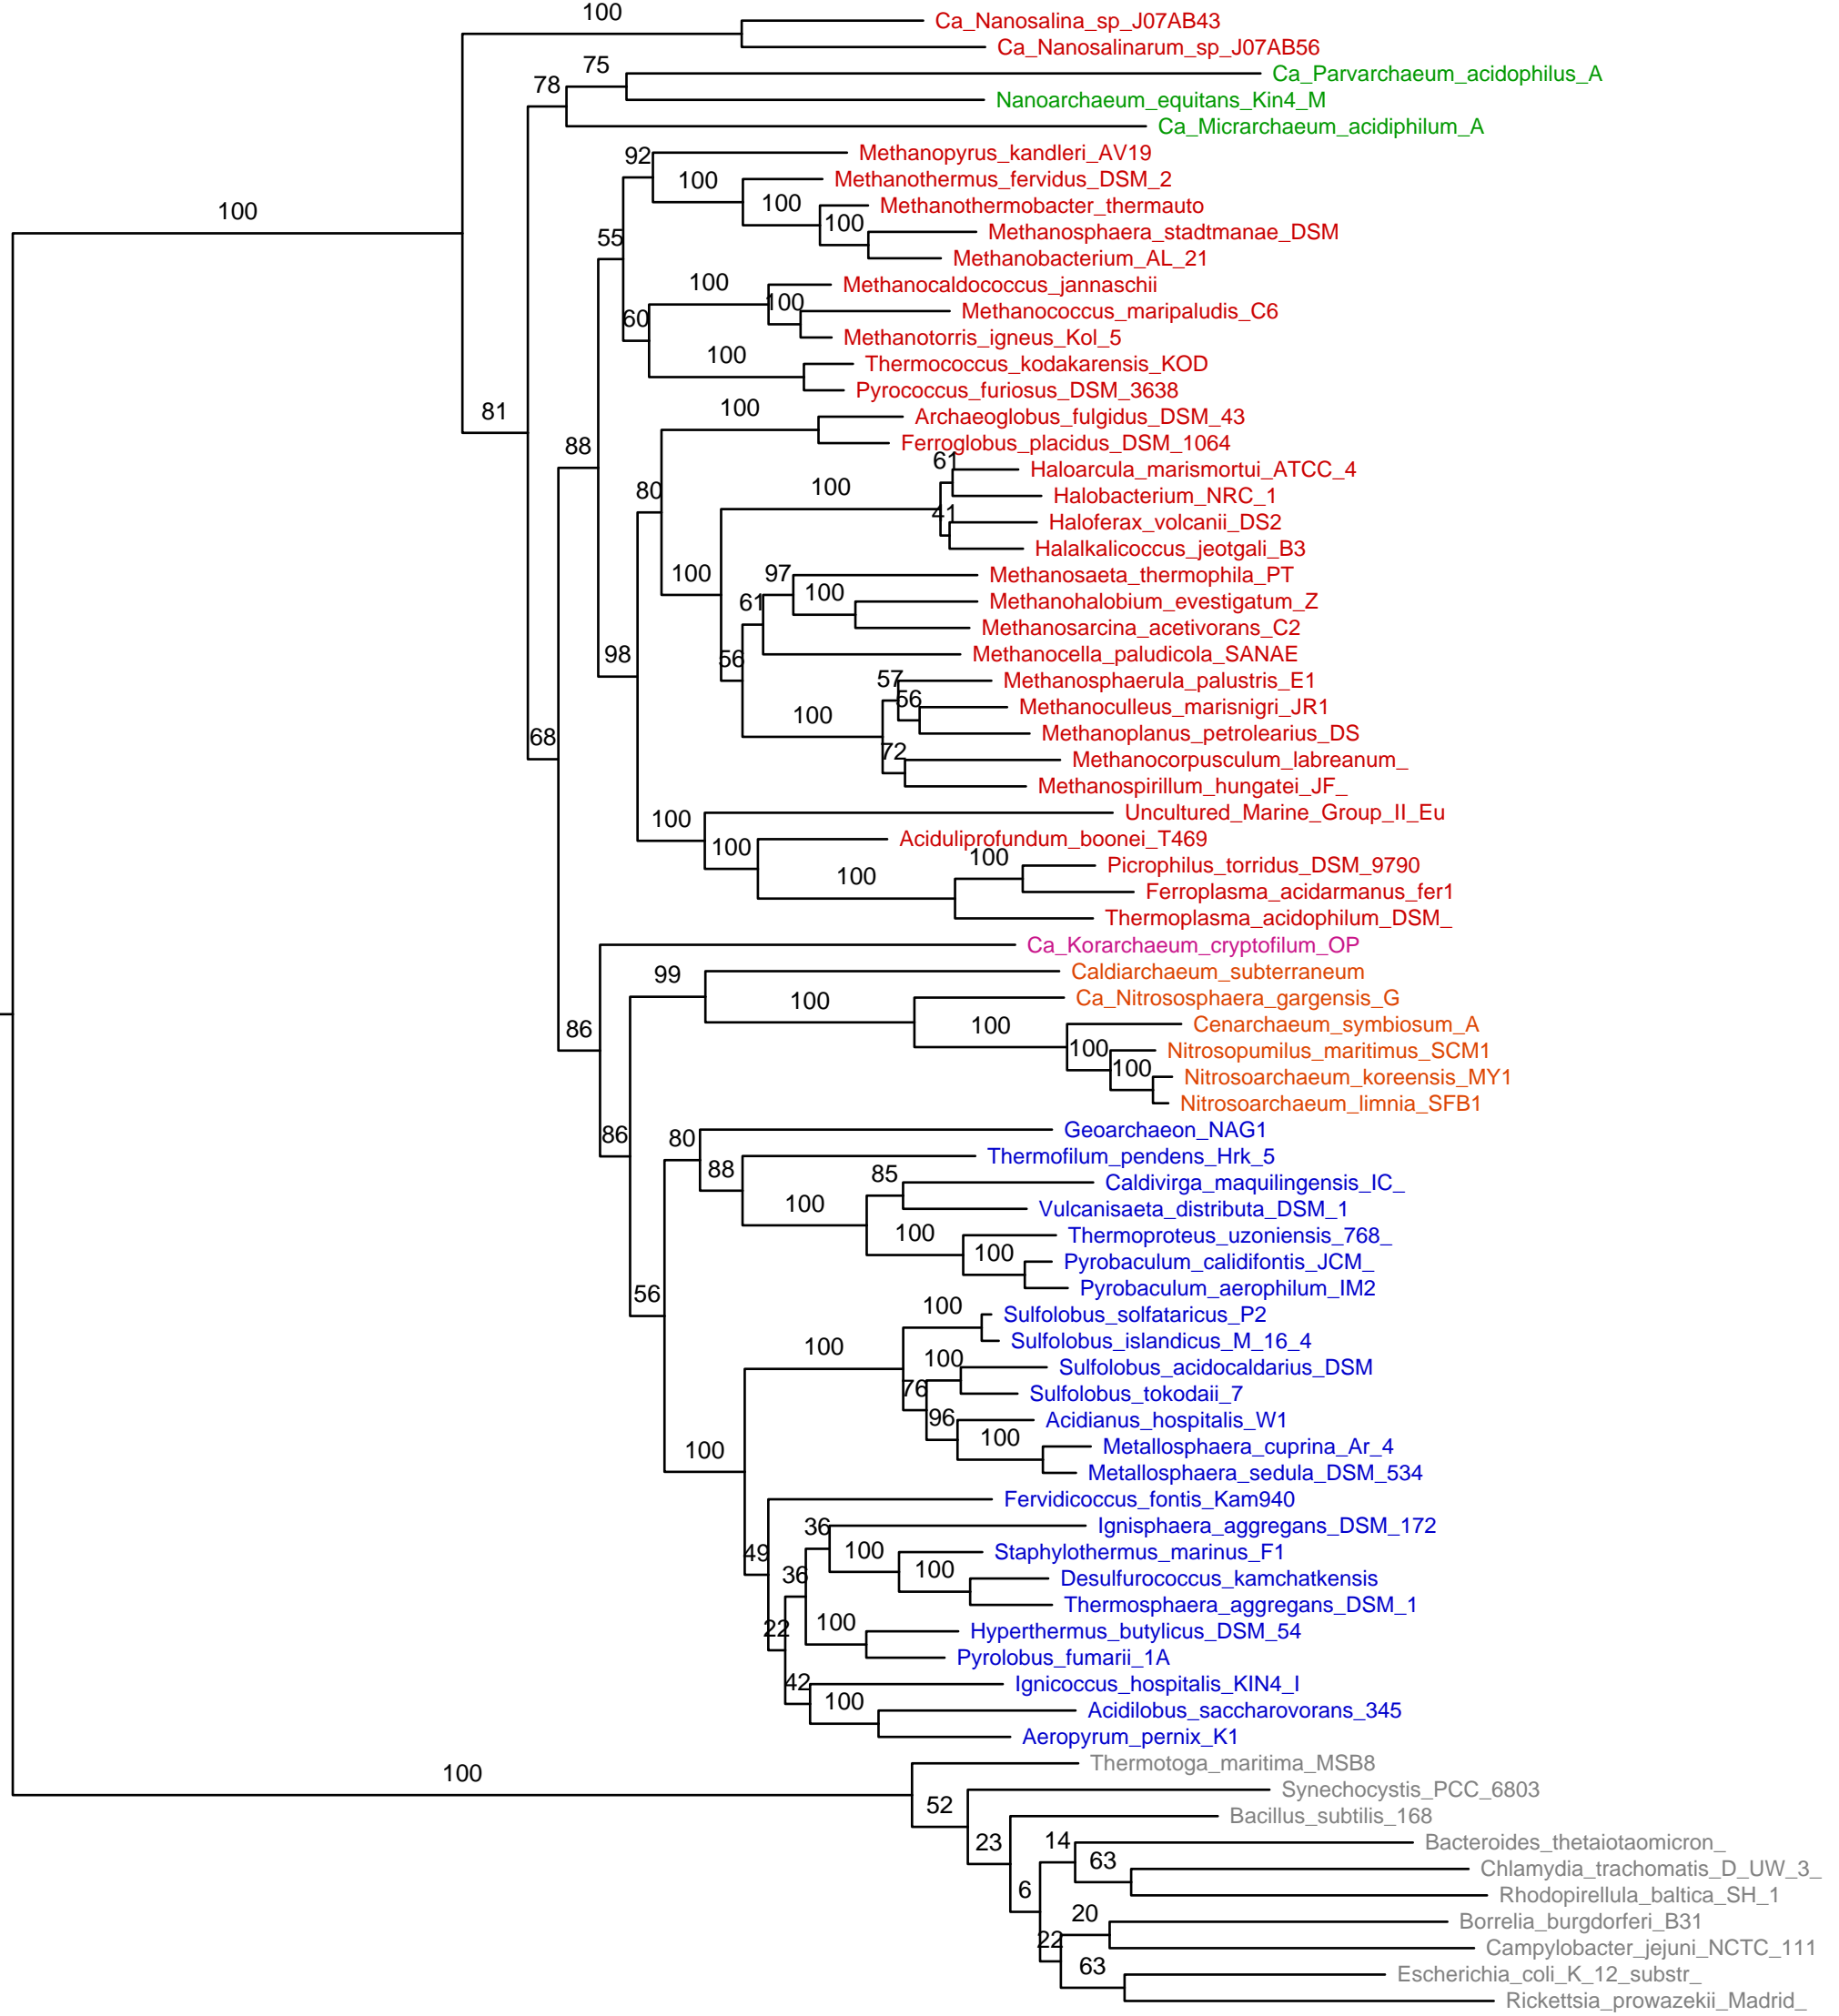

0.3

C: ML phylogeny (RAxML, CAT LG) of the 50% least biased sites of 33 r-proteins

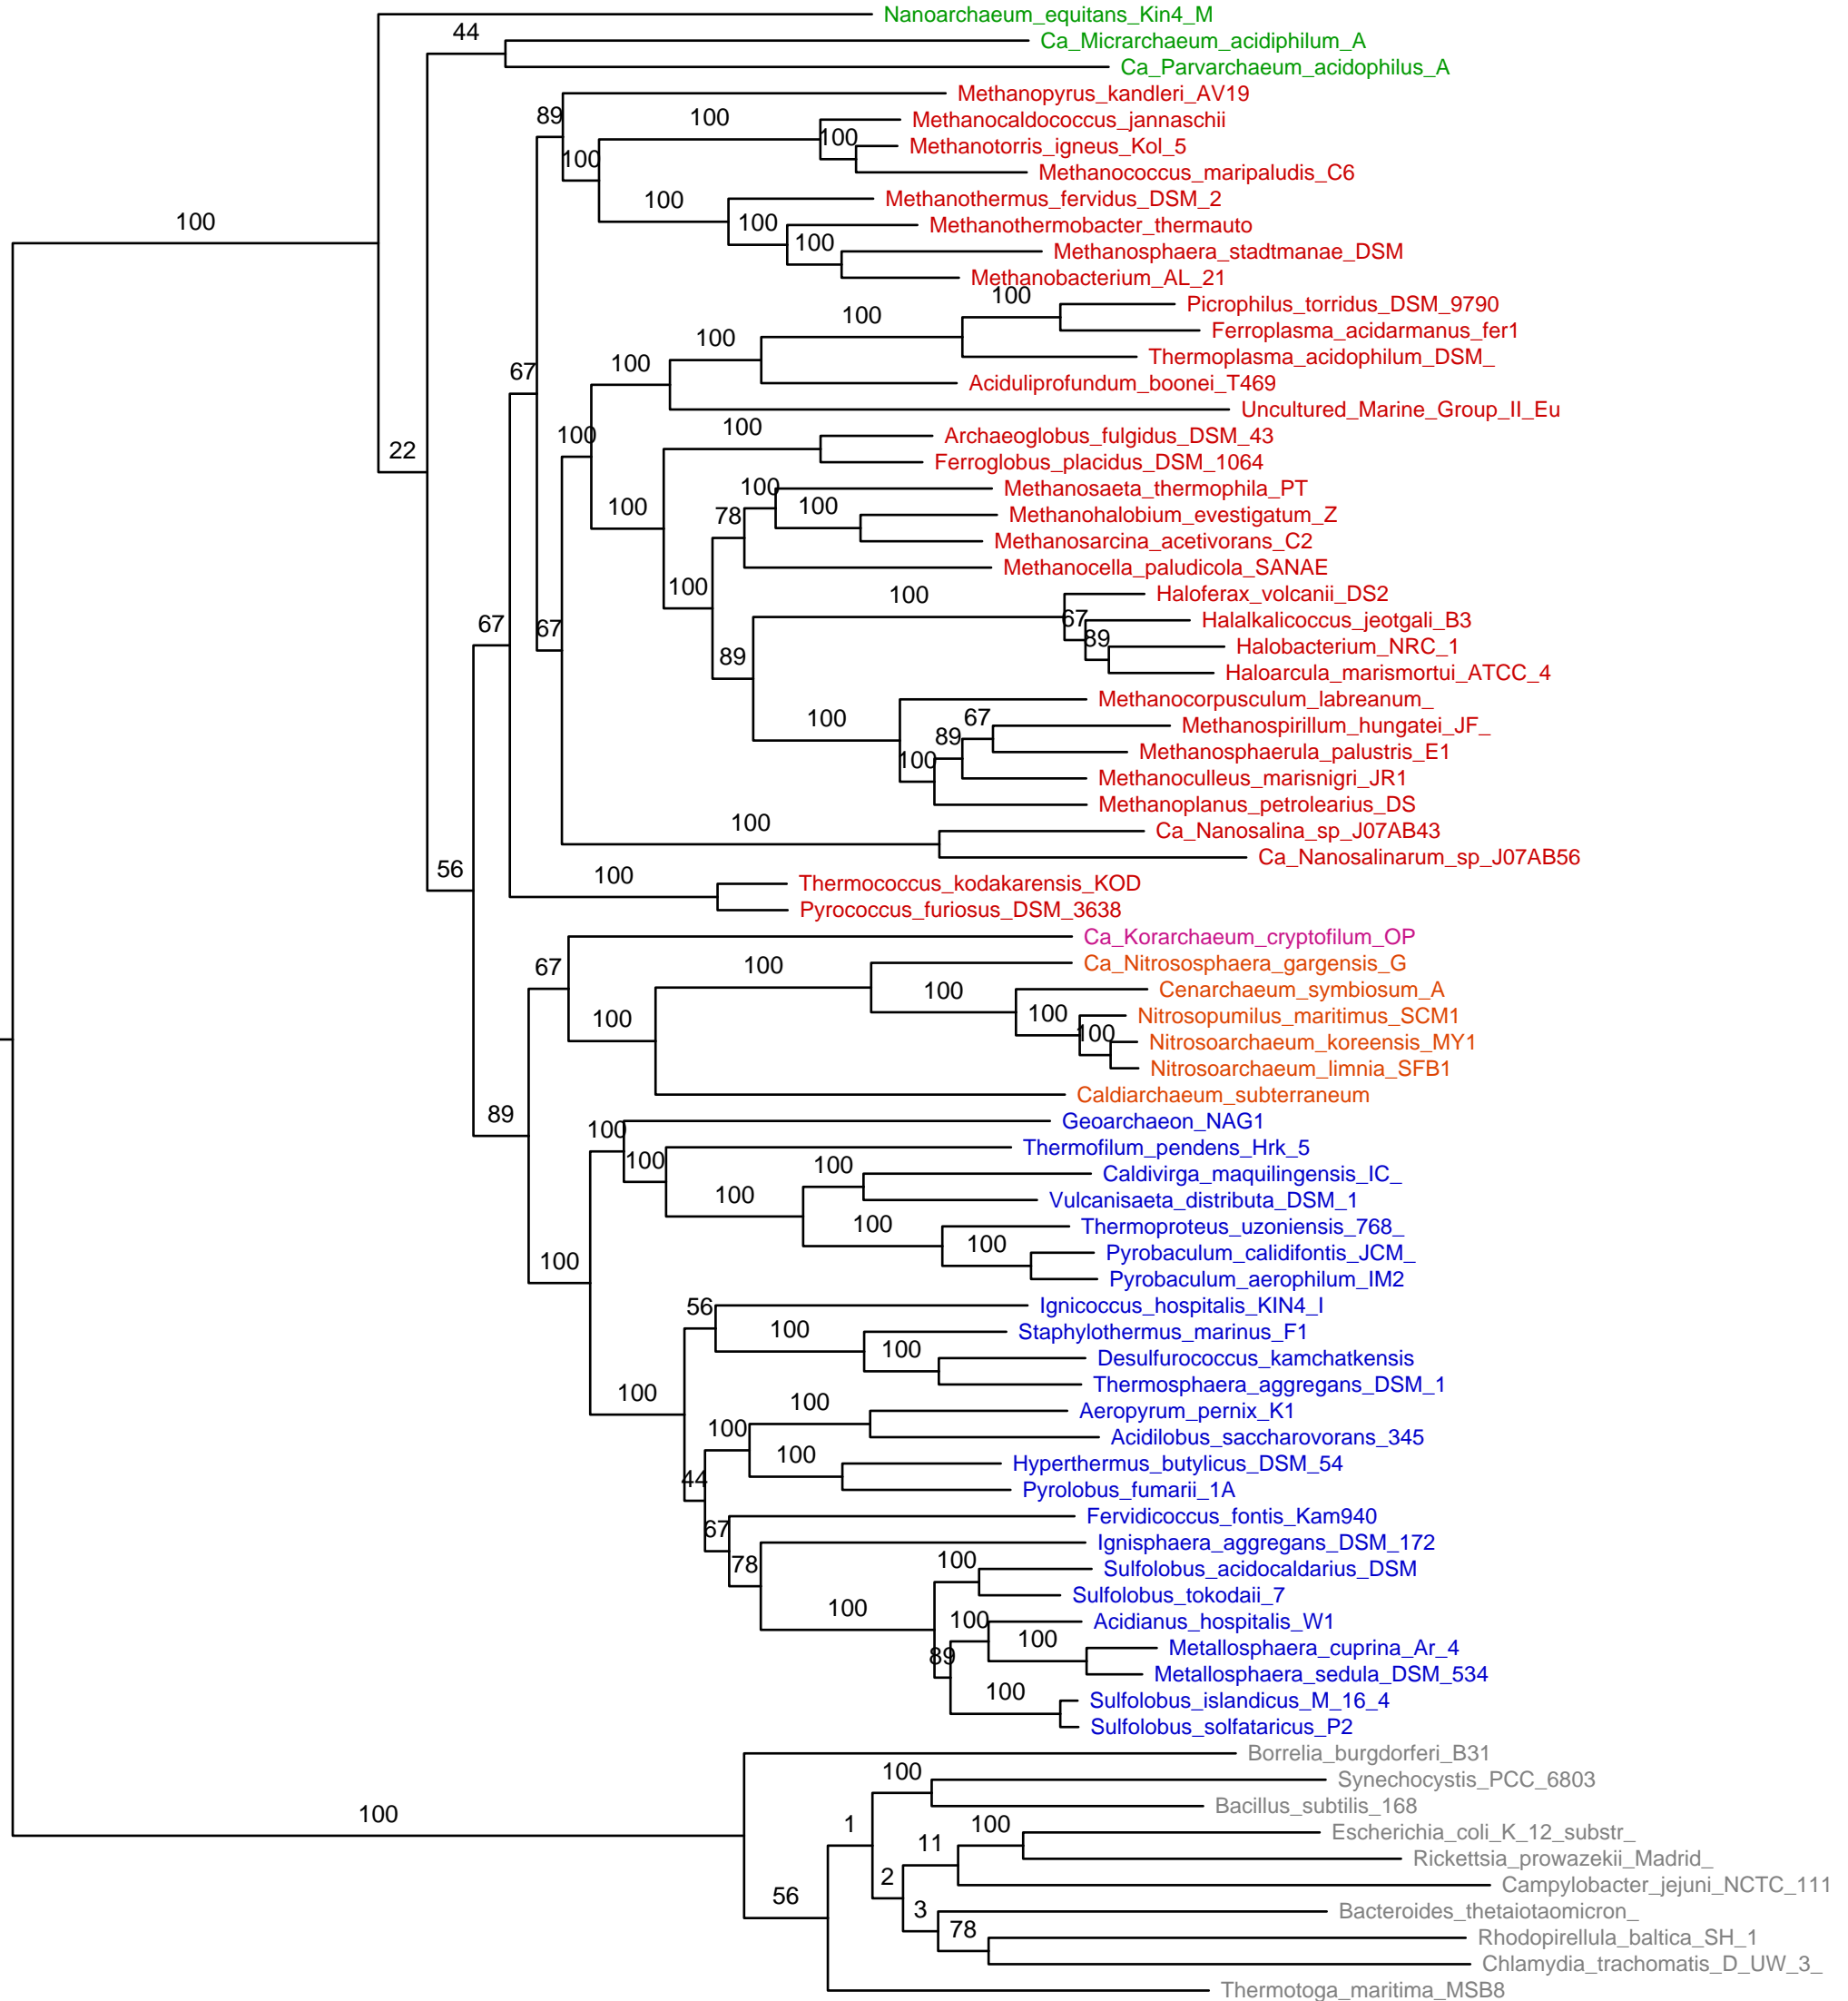

D: ML phylogeny (RAxML, CAT LG) of 25 non-r-proteins

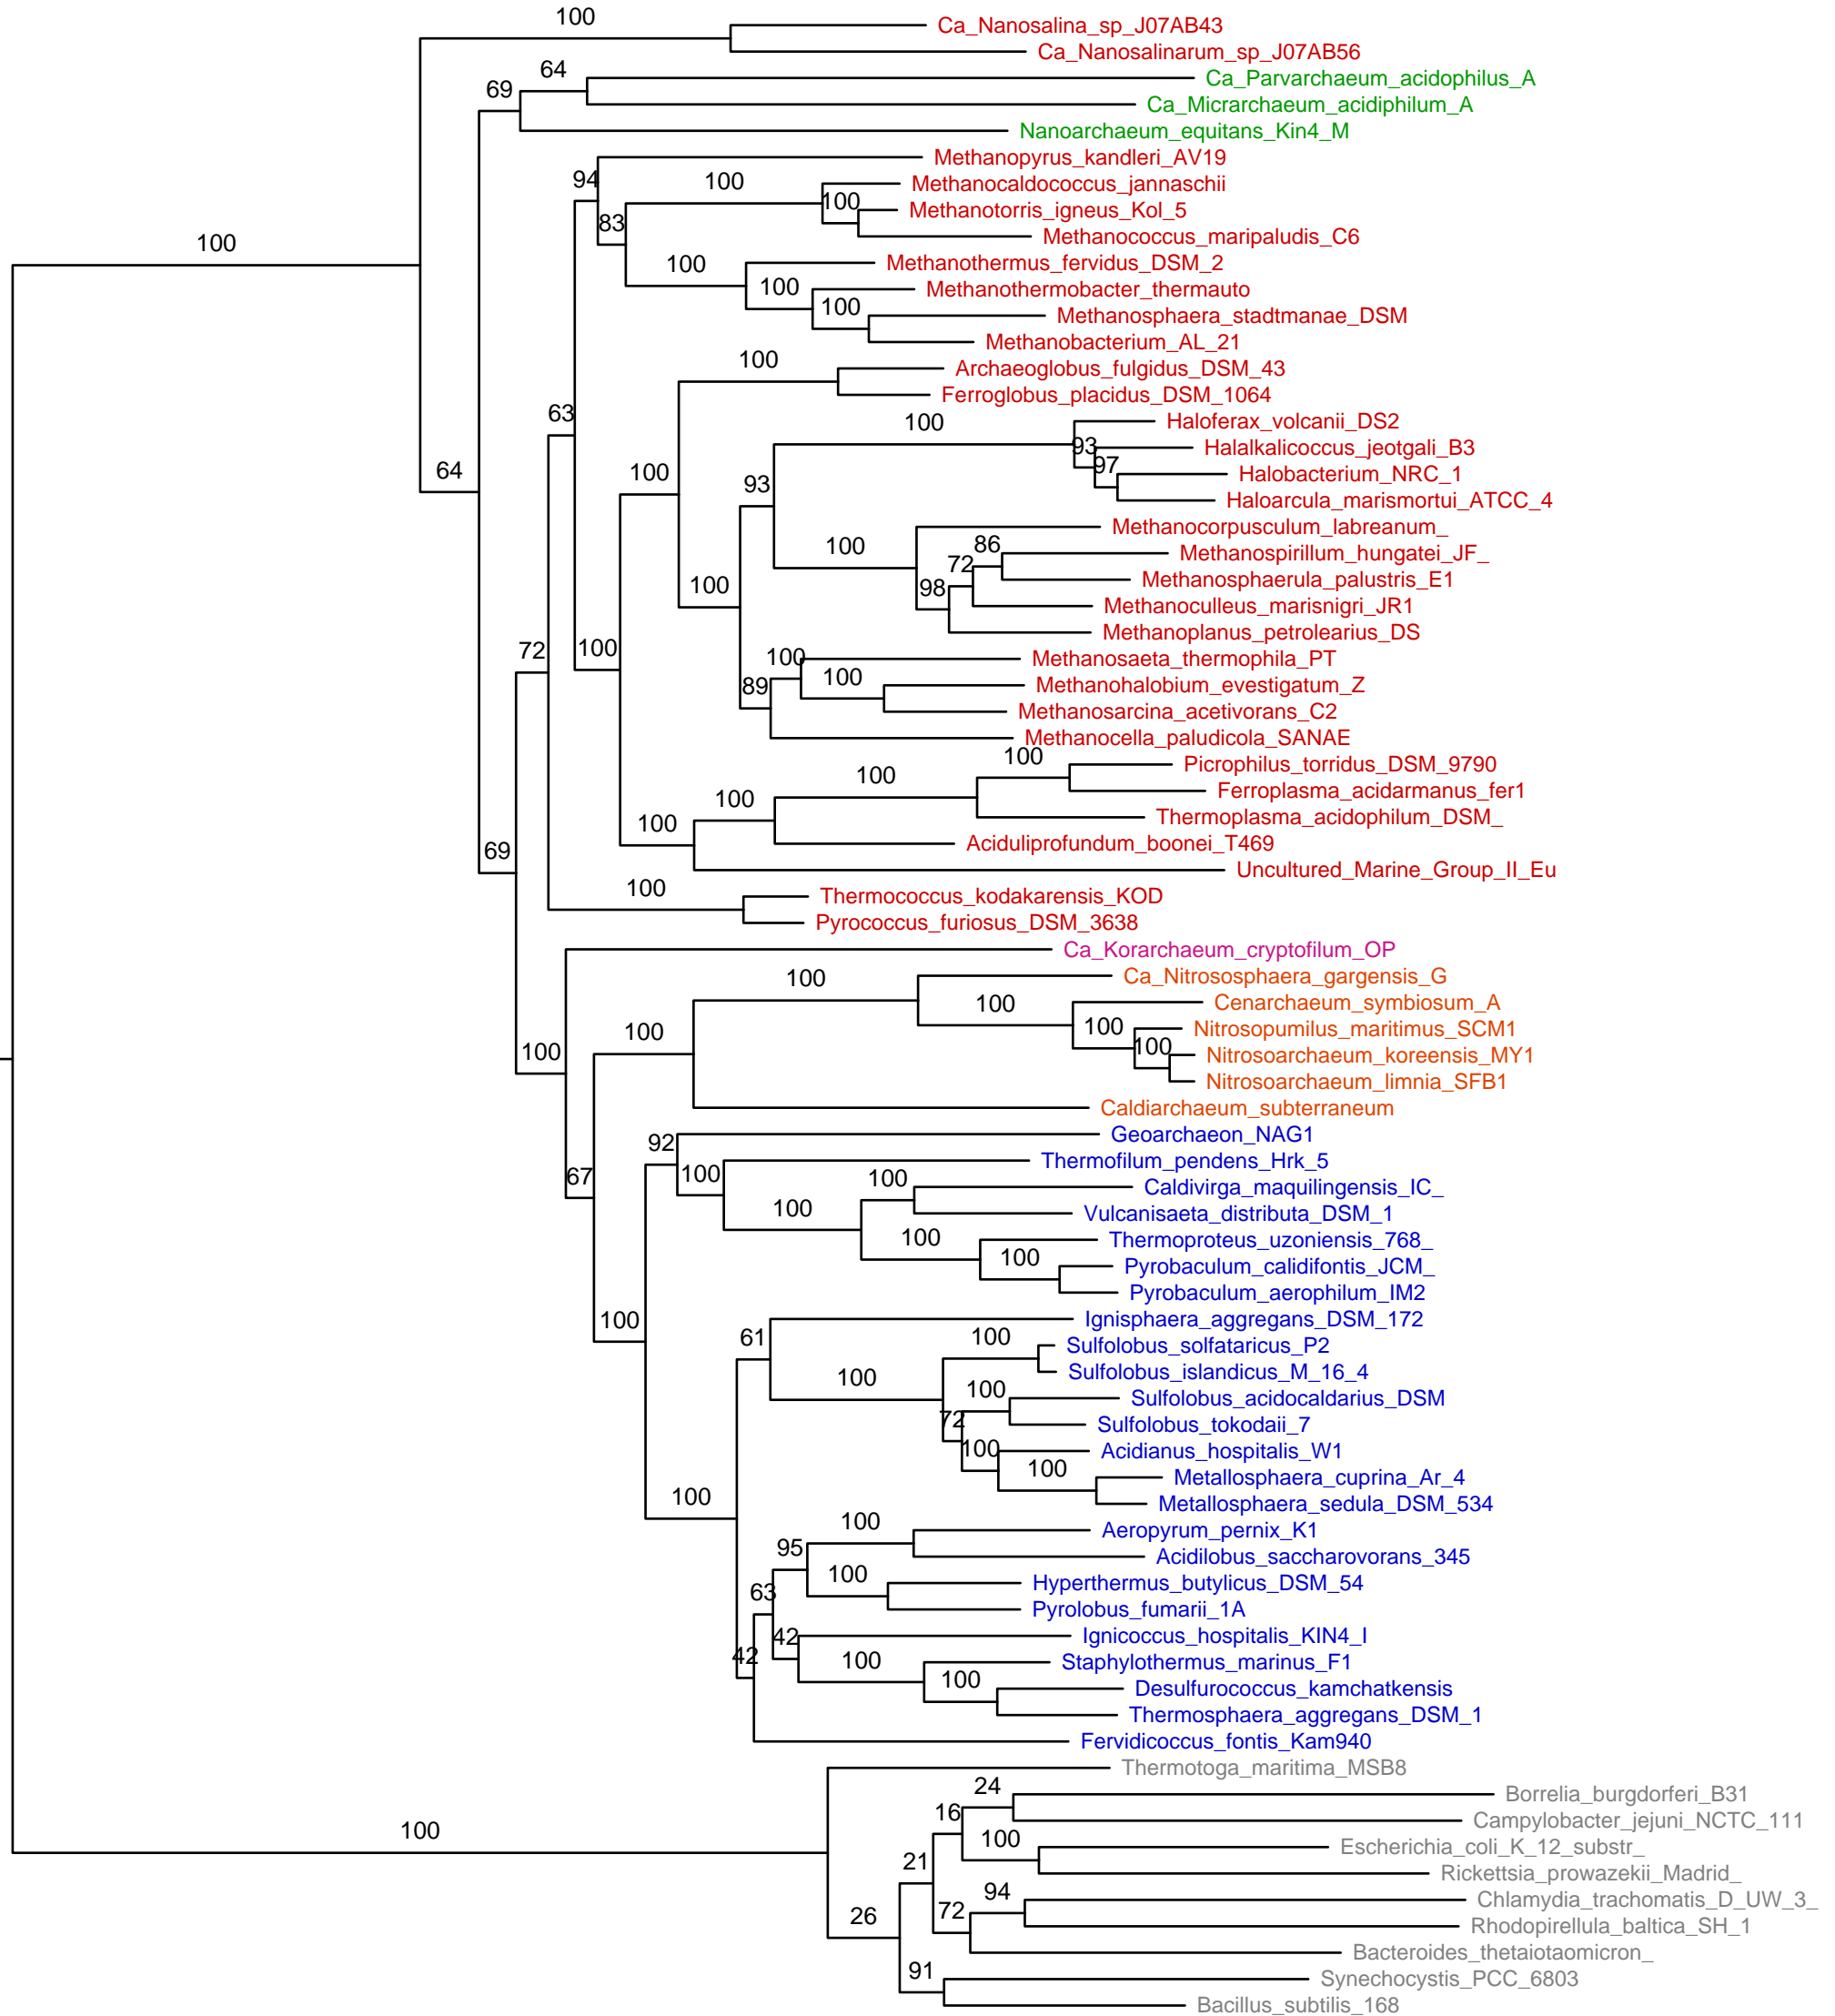

E: ML phylogeny (RAxML, CAT LG) of 57 conserved proteins

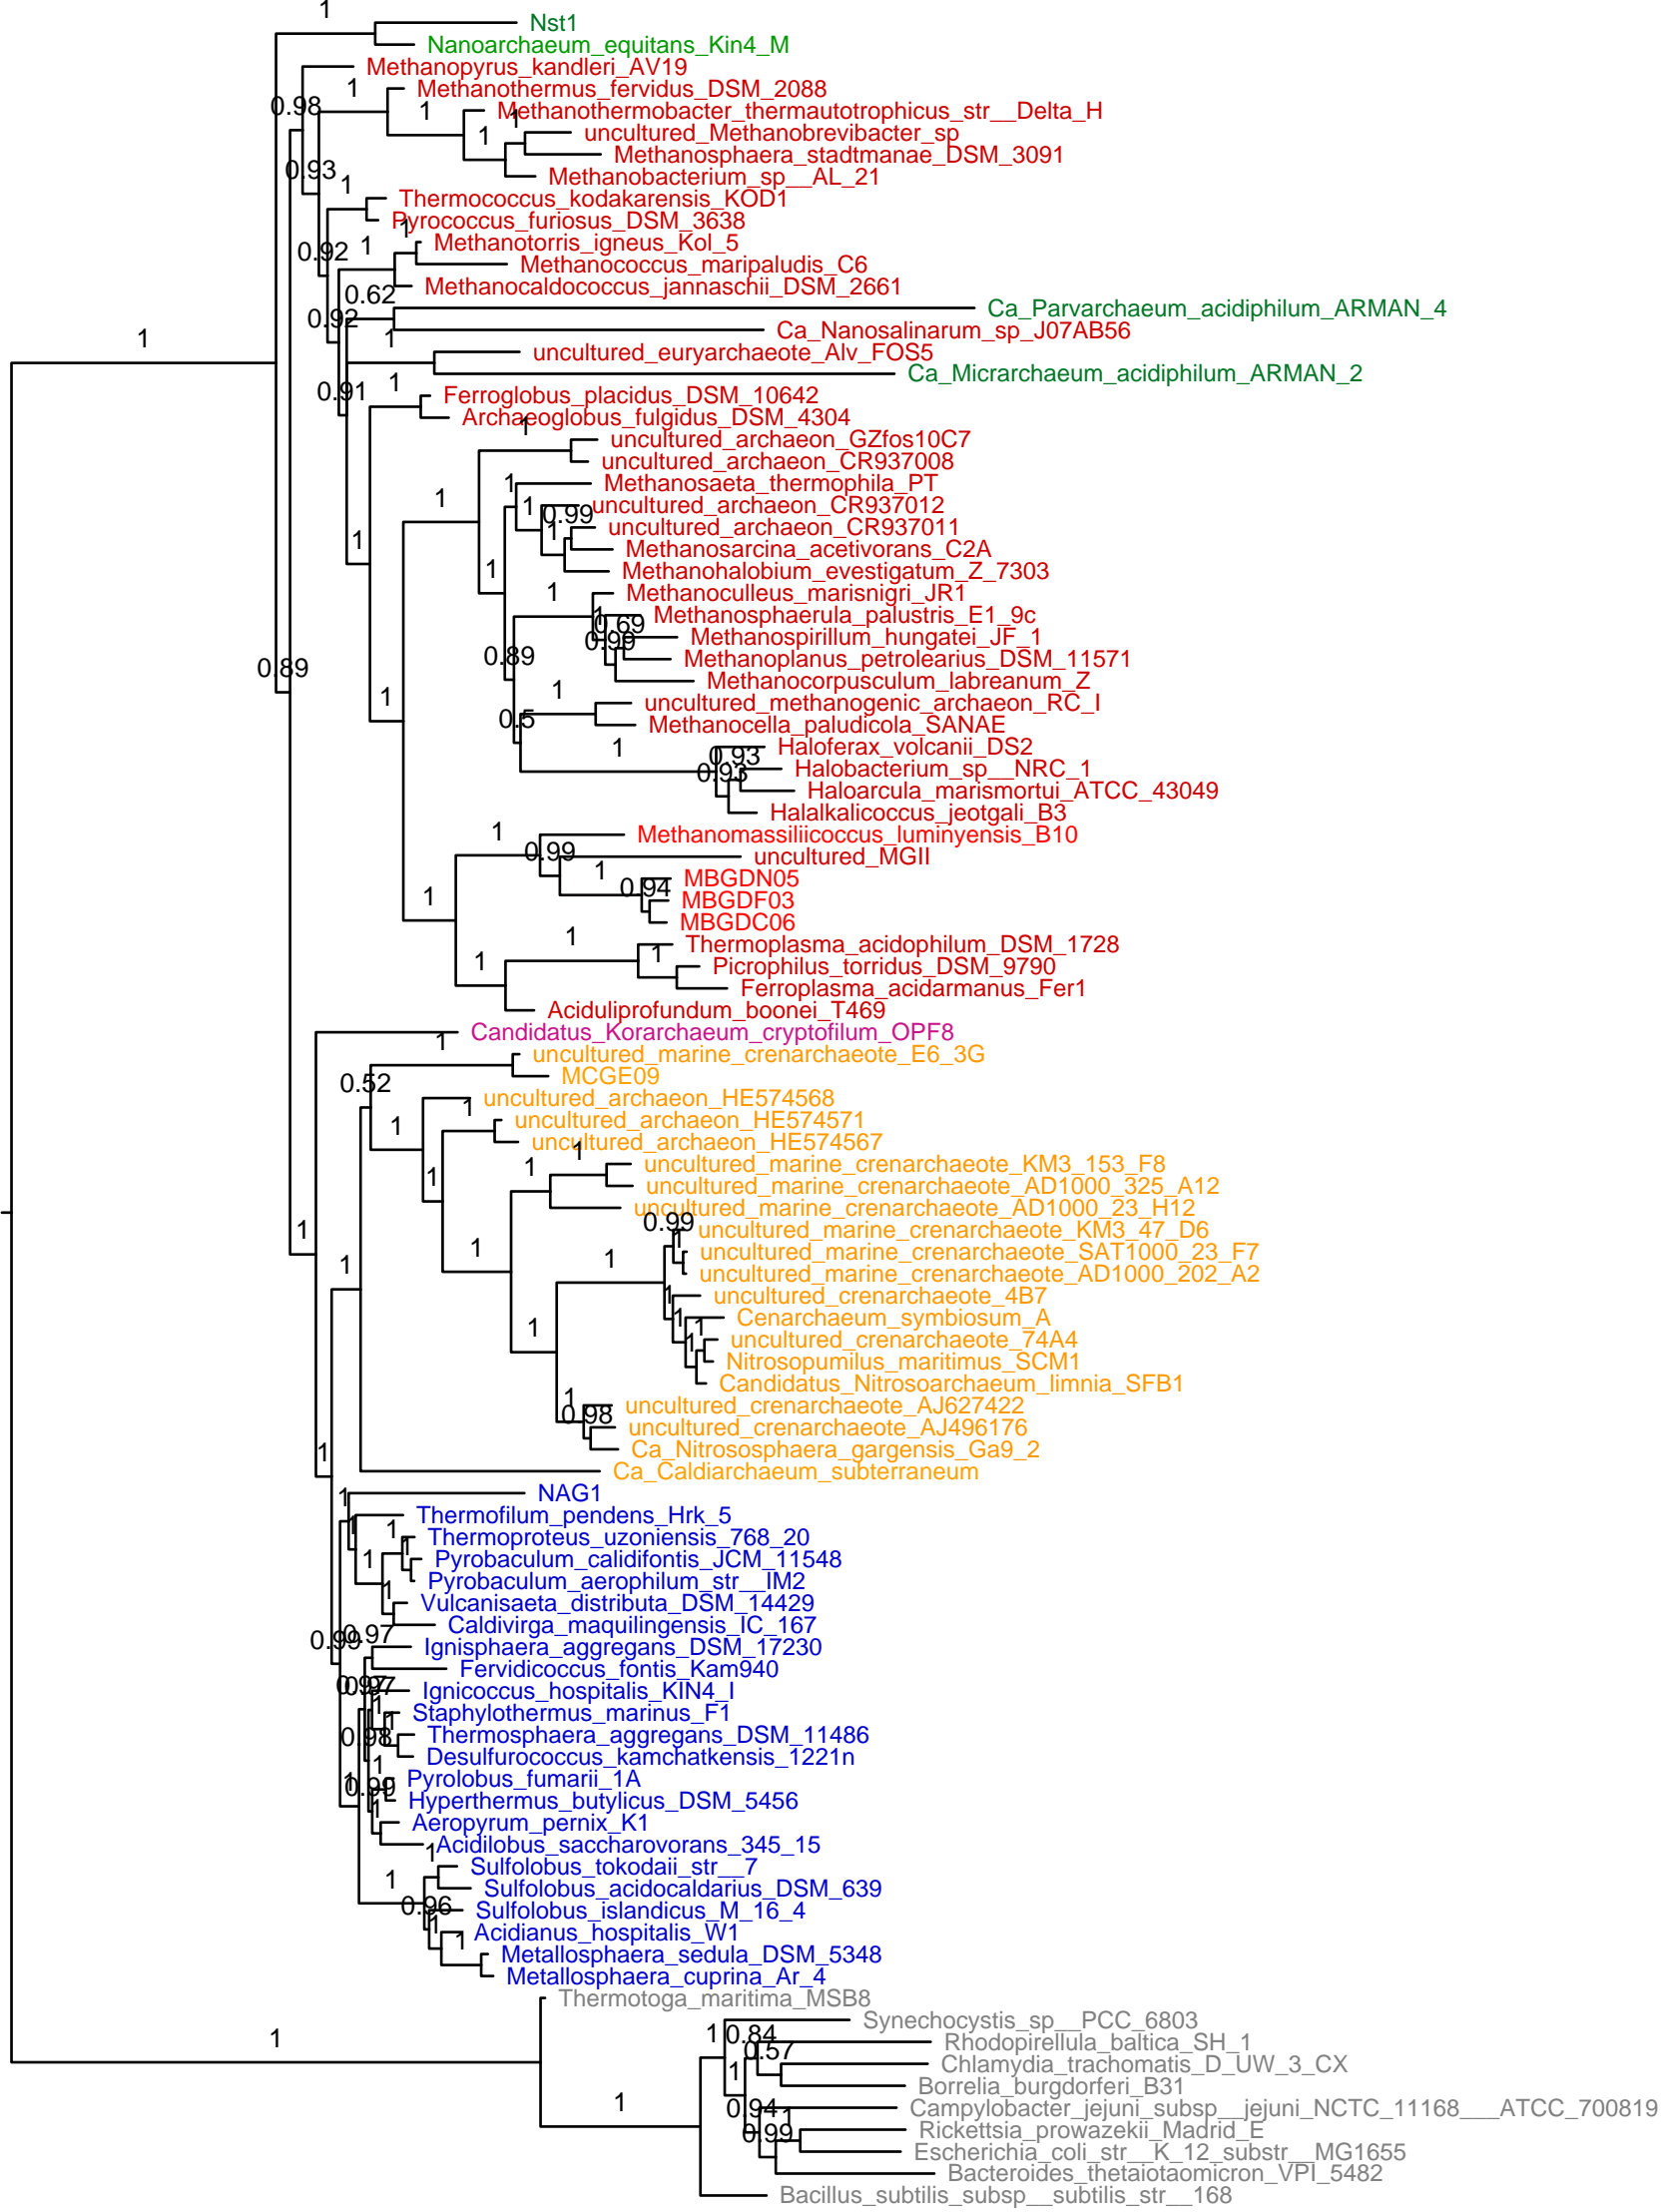

F: Bayesian phylogeny (phylobayes, CAT-Poisson) of 16S/23S rRNA
