# Supplementary material
Source: PubMed Central journal article supplement (PMC4069404)

**A** 33 r-proteins - Most biased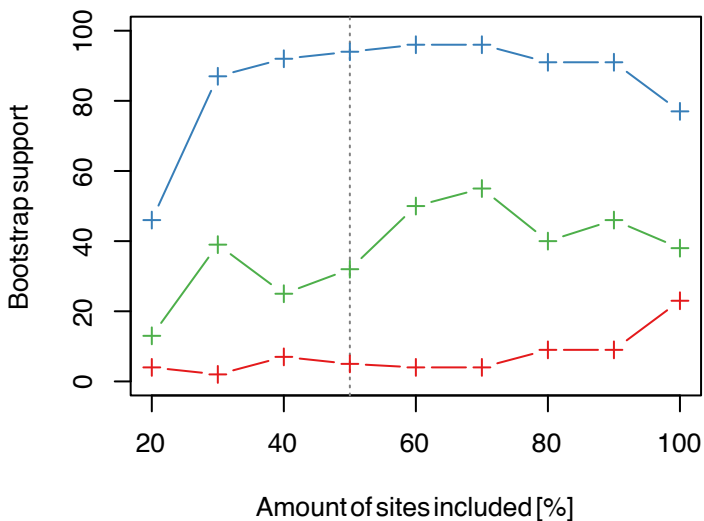**B** 33 r-proteins - Least biased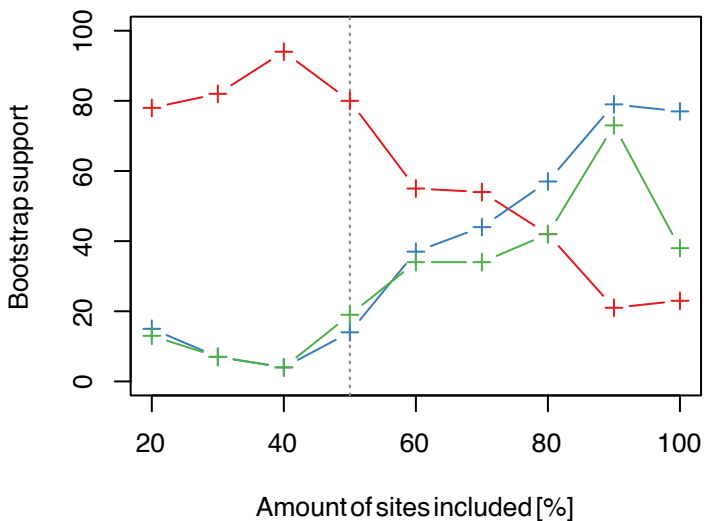**C** 25 non-ribosomal proteins - Most biased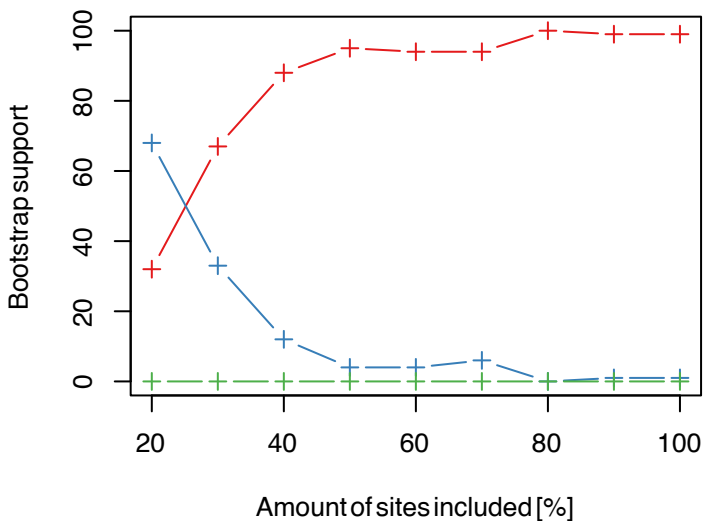**D** 25 non-ribosomal proteins - Least biased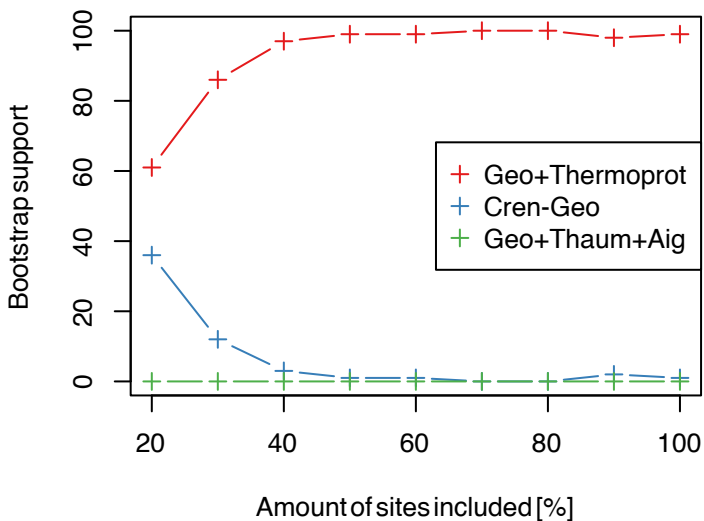

Supplement: ismej20146x5.pdf [file ismej20146x5.pdf]
