# Supplementary material
Source: PubMed Central journal article supplement (PMC4069404)
Supplement: ismej20146x7.pdf [file ismej20146x7.pdf]

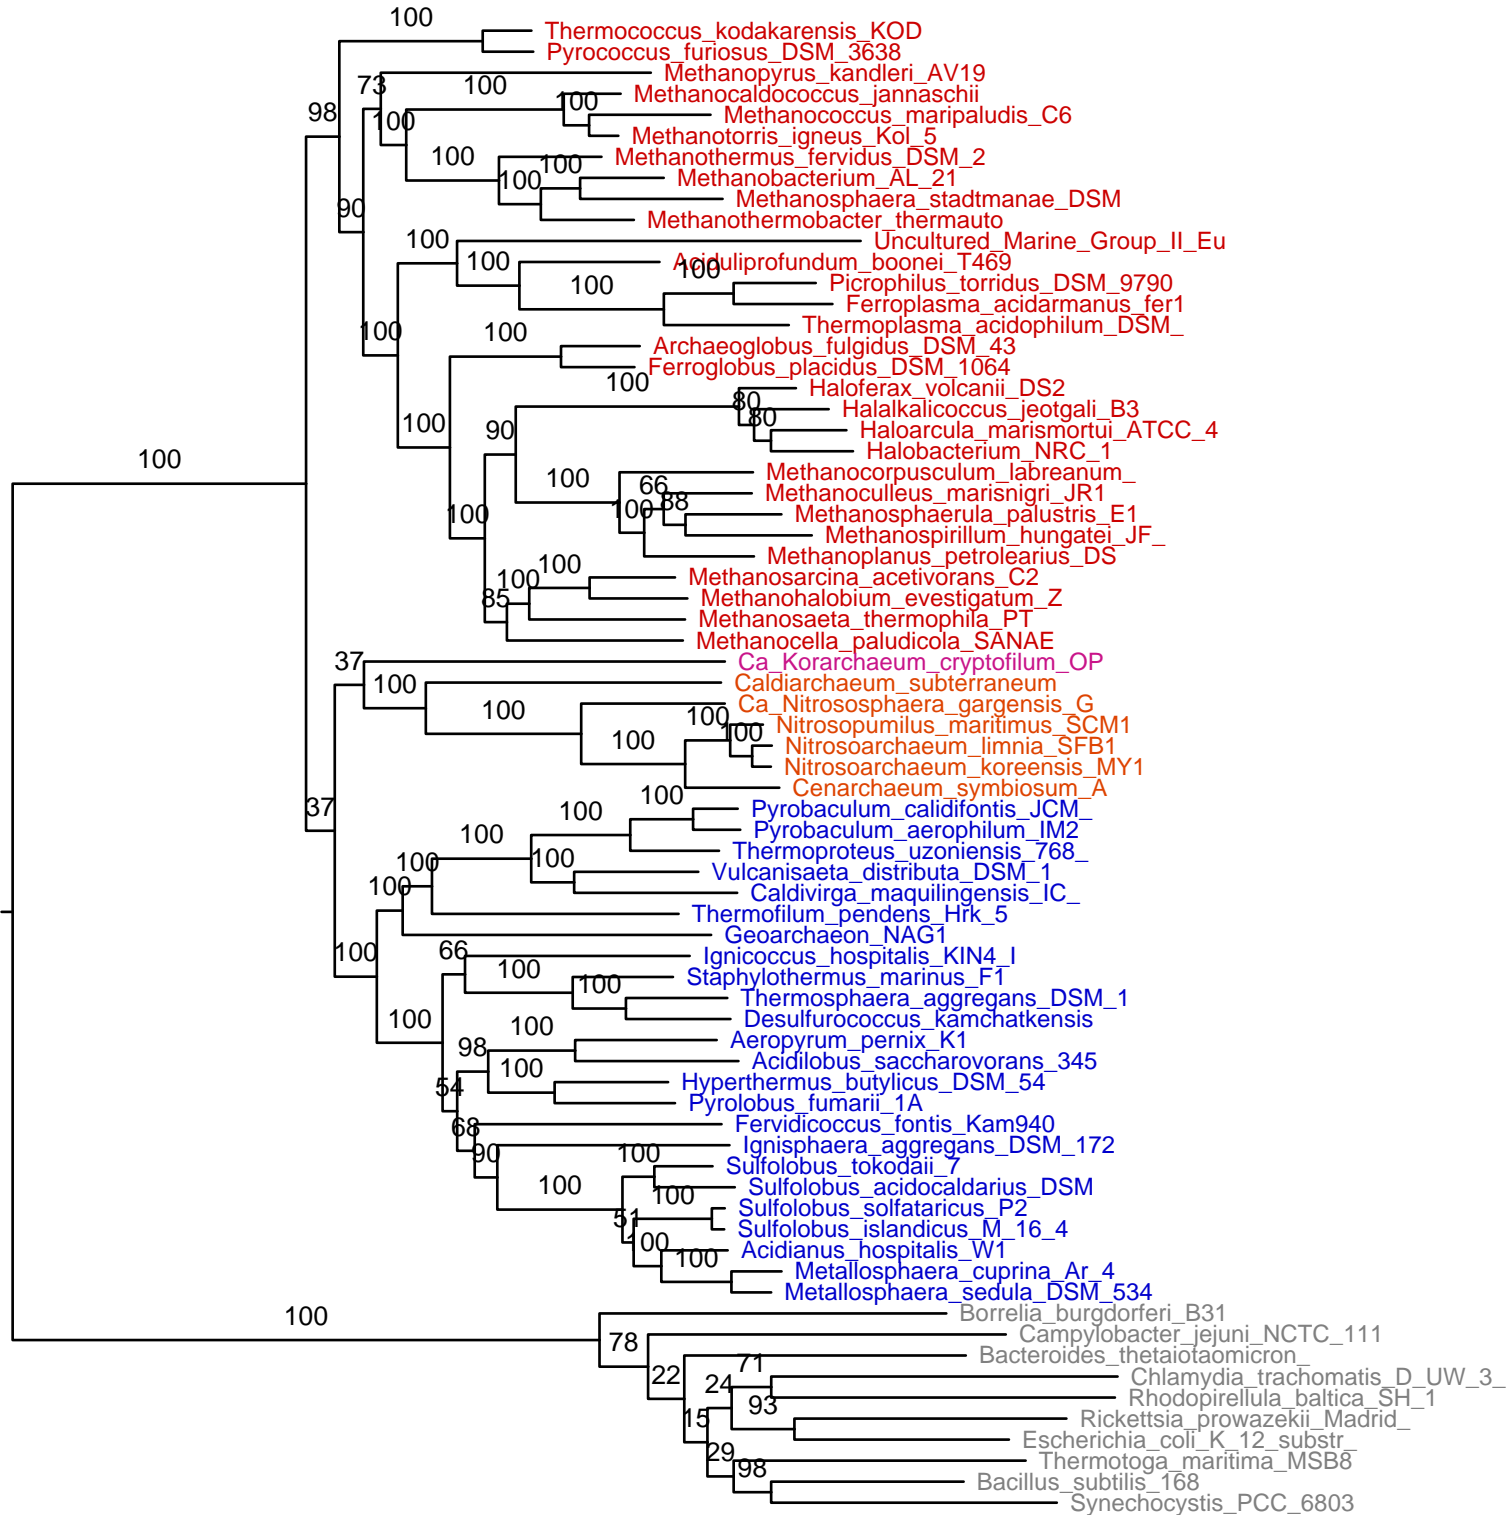

0.4

**B: ML phylogeny (RAxML, CAT LG) of 25 conserved, non r-proteins, without ARMAN, Nanohalo- or Nanoarchaeota**

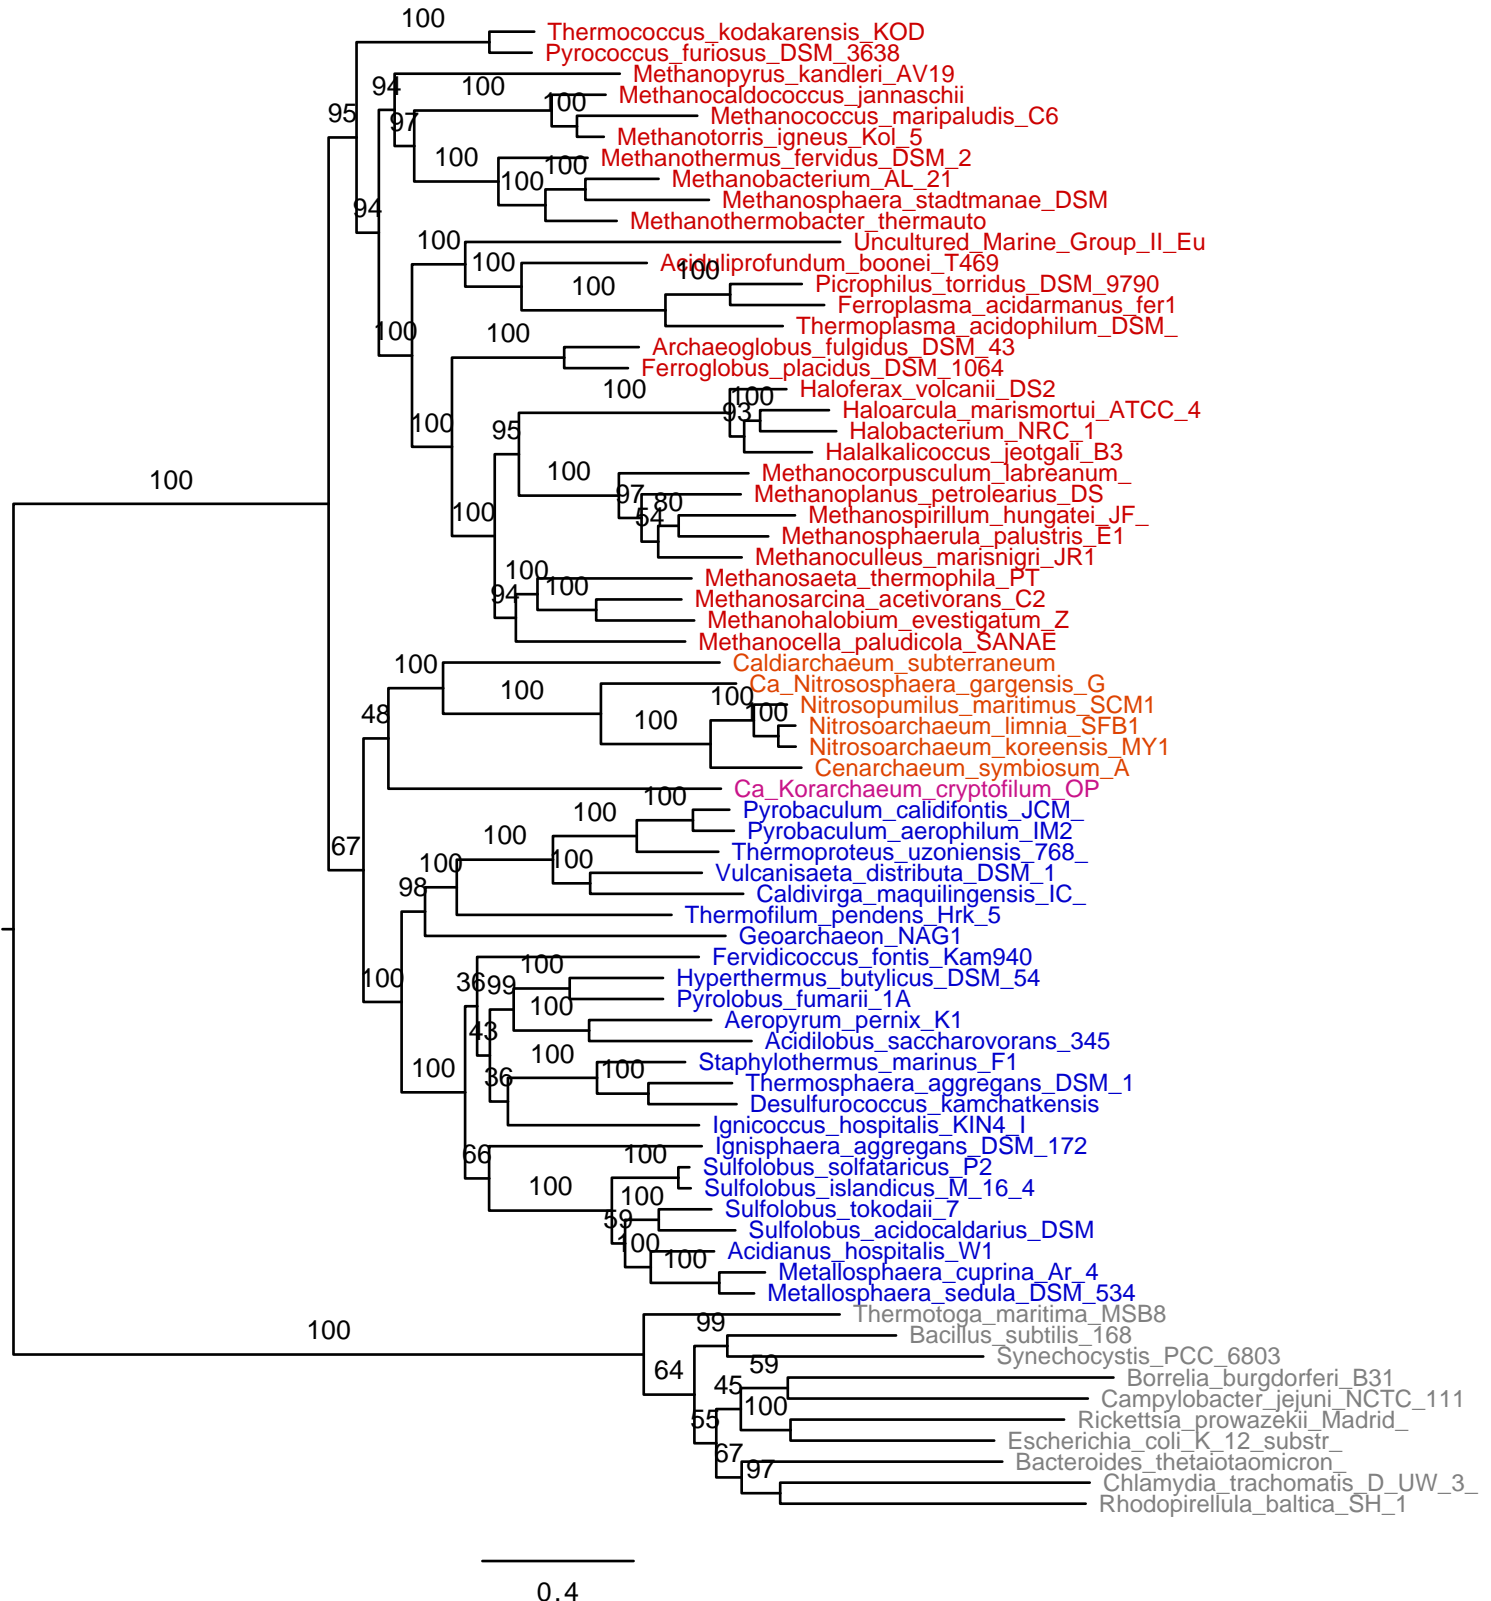

C: ML phylogeny (RAxML, CAT LG) of 57 conserved proteins, without ARMAN, Nanohalo- or Nanoarchaeota

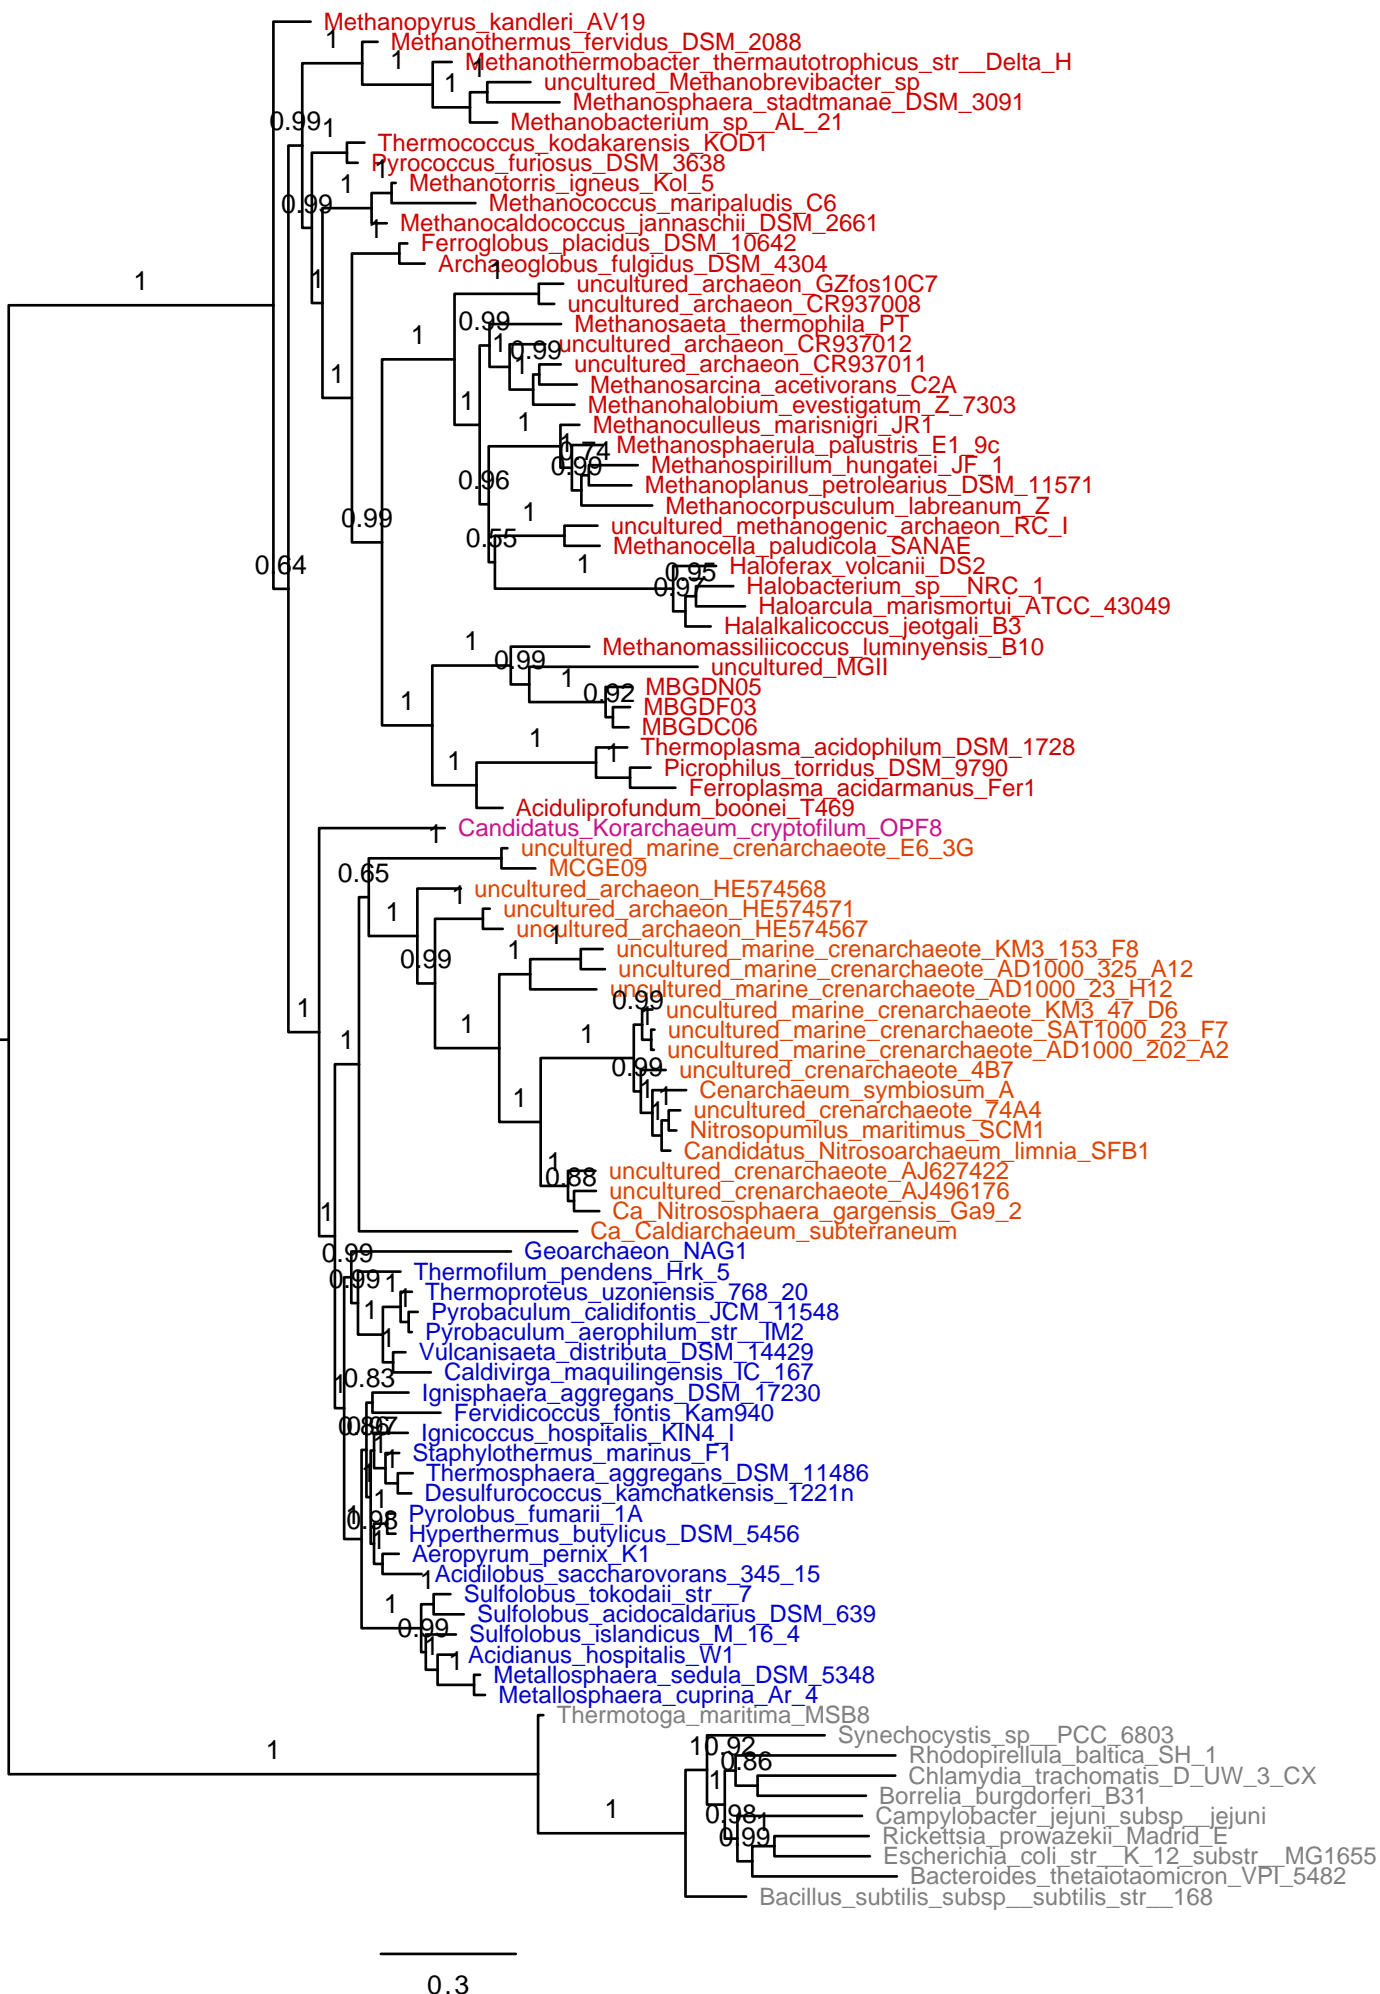

D: Bayesian phylogeny (phylobayes, CAT-Poisson) of 16S/23S rRNA, without ARMAN, Nanohalo- or Nanoarchaeota
