# Supplementary material
Source: PubMed Central journal article supplement (PMC4069404)
Supplement: ismej20146x8.pdf [file ismej20146x8.pdf]

| Signature proteins                    | arCOG                 | COG       | <i>Thaumarchaeota</i> | <i>Aigarchaeota</i> | <i>Crenarchaeota</i>  | <i>Geoarchaeota</i> incl. *SAGs<br>(Rinke et al., 2013) | <i>Korarchaeota</i> | <i>Euryarchaeota</i> | <i>Nanoarchaeota</i> |
|---------------------------------------|-----------------------|-----------|-----------------------|---------------------|-----------------------|---------------------------------------------------------|---------------------|----------------------|----------------------|
| RNA polymerase G (=rpo8)              | arCOG04271            | -         | -                     | -                   | ◆                     | -                                                       | ◆                   | -                    | -                    |
| RNA polymerase A - single ORF         | arCOG04256/arCOG04257 | 0086      | ◆                     | ◆                   | split                 | split                                                   | ◆                   | split                | split                |
| RNA polymerase B - single ORF         | arCOG01762            | 0085      | ◆                     | ◆                   | ◆                     | ◆                                                       | ◆                   | most split           | split, no operon     |
| MBF1                                  | arCOG01863            | 1813      | (◆)                   | ◆                   | ◆                     | ◆                                                       | ◆                   | ◆                    | ◆                    |
| EIF1                                  | arCOG04136            | 4888      | -                     | ◆                   | ◆                     | ◆                                                       | ◆                   | -                    | -                    |
| RNase P/RNase MRP subunit POP5        | arCOG01365            | 1369      | -                     | ◆                   | ◆                     | ◆*                                                      | ◆                   | ◆                    | -                    |
| RNase P 30                            | arCOG00307            | 1603      |                       | ◆                   | ◆                     | ◆                                                       | ◆                   | ◆                    | -                    |
| DNA pol D (small)                     | arCOG04455            | 1311      | ◆                     | ◆                   | -                     | ◆                                                       | ◆                   | ◆                    | ◆                    |
| DNA pol D (large)                     | arCOG04447            | 1933      | ◆                     | ◆                   | -                     | - fragment?                                             | ◆                   | ◆                    | ◆                    |
| RPA (Eury-like, complex)              | (arCOG01510)          | (1599)    | ◆                     |                     | - only T. pendens     | -                                                       | ◆                   | ◆                    | ◆                    |
| RPA / SSB (Cren-like, single OB-fold) | arCOG01510            | 1599      | ◆                     | ◆                   | ◆                     | ◆                                                       | ◆                   | (◆)                  | -                    |
| PCNA                                  | arCOG00488            | 0592      | 1                     | 1                   | ◆ (one in T. pendens) | 1                                                       | 1                   | 1                    | 1                    |
| Topo IB                               | arCOG08649            | 3569      | ◆                     | ◆                   | -                     | -                                                       | -                   | -                    | -                    |
| Topo IA                               | arCOG01527            | 0550      | (◆)                   | ◆                   | ◆                     | ◆*                                                      | ◆                   | ◆                    | ◆                    |
| TopoIIA (subunit A+B)                 | arCOG04367+arCOG04371 | 0188+0187 | -                     | -                   | -                     | -                                                       | -                   | (◆)                  | -                    |
| reverse gyrase                        | arCOG01526            | 1110      | -                     | ◆                   | ◆                     | ◆                                                       | ◆                   | ◆ (HT)               | ◆ (split)            |
| ESCRT-III (CdvB homologs)             | arCOG00452            | 5491      | ◆                     | ◆                   | ◆                     | ◆                                                       | -                   | -                    | -                    |
| Vps4 (CdvC)                           | arCOG01307            | 0464      | ◆                     | ◆                   | ◆                     | ◆                                                       | -                   | -                    | -                    |
| CdvA                                  | arCOG04054            | -         | ◆                     | -                   | ◆                     | ◆*?                                                     | -                   | -                    | -                    |
| Fts Z                                 | arCOG02201            | 0206      | ◆                     | ◆                   | -                     | -                                                       | ◆                   | ◆                    | ◆                    |
| Smc, Chromosome segregation ATPase    | arCOG00370            | 1196      | ◆                     | ◆                   | -                     | - fragment?                                             | ◆                   | ◆                    | -                    |
| ScpA + ScpB                           | arCOG02610+arCOG02613 | 1354+1386 | ◆                     | ◆                   | -                     | -                                                       | ◆                   | (◆)                  | -                    |
| crenactin                             | arCOG05583            | -         | -                     | ◆                   | (◆)                   | -                                                       | ◆                   | -                    | -                    |
| Histones (H3/H4-like)                 | arCOG02144            | 2036      | ◆                     | ◆                   | - (exc. two)          | -                                                       | ◆                   | ◆                    | ◆                    |
