# Supplementary material
Source: PubMed Central journal article supplement (PMC4069404)
Supplement: ismej20146x9.pdf [file ismej20146x9.pdf]

2  
3 **‘Geoarchaeon NAG1’ is a deeply-rooting lineage of the**  
4 **archaeal order Thermoproteales rather than a new phylum**

5  
6 Lionel Guy, Anja Spang, Jimmy H. Saw and Thijs J. G. Ettema\*

7  
8 **Supplementary Material**

9  
10 **Supplementary Methods (MS Word document):** A more complete description of the  
11 methods used in the main article.

12  
13 **Supplementary Figure S1 (PDF):** Individual ML phylogenies of the 33 r-proteins used in the  
14 concatenated alignment of Figure 1A. Euryarchaeota and Nanoarchaeota are shown in  
15 red, Nanoarchaeota and ARMAN strains are shown in green, Crenarchaeota in blue,  
16 Thaum- and Aigarchaeota in orange, Korarchaeota in pink, and bacteria in grey.

17  
18 **Supplementary Figure S2 (PDF):** Individual ML phylogenies of the 25 non-r-proteins used  
19 in the concatenated alignment of Figure 1D. Colors as in Supplementary Figure S1.

20  
21 **Supplementary Figure S3 (PDF):** Full phylogenies as depicted in Figure 1, i.e. without  
22 collapsed taxa. **(A)** ML inferred from 33 universal r-proteins. **(B)** ML inferred from the 50%  
23 most compositionally biased sites of 33 universal r-proteins. **(C)** ML inferred from the 50%  
24 least compositionally biased sites of 33 universal ribosomal proteins. **(D)** ML inferred from 25  
25 conserved non-r-proteins, filtered for horizontal gene transfers. **(E)** ML inferred from a set of  
26 57 conserved proteins (combination of 32 r-proteins and 25 others), filtered for horizontal  
27 gene transfers. **(F)** Bayesian phylogeny from concatenated alignments of the sequences of  
28 the 16S and 23S rRNA sequences. Colors as in Supplementary Figure S1.

30 **Supplementary Figure S4 (PDF):** Bayesian phylogeny (phylobayes, CAT-Poisson model)  
31 inferred from 33 universal ribosomal proteins. Colors as in Supplementary Figure S1.

32

33 **Supplementary Figure S5 (PDF):** Assessment of the effect of removal of biased sites on  
34 the support for placement of NAG1. The x-axis shows the percentage of sites included in the  
35 alignment. The y-axis shows the number of times a particular bipartitions is supported in 100  
36 non-parametric bootstraps. The three bipartitions tested are: NAG1 grouping with  
37 Thermoproteales (Geo+Thermoprot, red); NAG1 separated from Crenarchaeota (Cren-Geo,  
38 blue); and NAG1 grouping with Thaum- and Aigarchaeota (Geo+Thaum+Aig, green). The  
39 figure shows the analysis for the 33 r-protein concatenated alignment, keeping the most **(A)**  
40 or least **(B)** biased sites and for the 25 non-r-protein concatenated alignment, keeping the  
41 most **(C)** or least **(D)** biased sites. Vertical dashed lines in A and B mark the alignments from  
42 which phylogenies represented in Figure 1B and 1C, respectively, were inferred.

43

44 **Supplementary Figure S6 (PDF):** ML phylogeny of concatenated 16S and 23S genes.  
45 Colors as in Supplementary Figure S1.

46

47 **Supplementary Figure S7 (PDF):** Maximum likelihood and Bayesian phylogenies without  
48 the fast-evolving ARMAN, Nanohalo- and Nanoarchaeota lineages: **(A)** ML phylogeny of 33  
49 r-proteins, as in Figure 1A and Supplementary Figure S2; **(B)** ML phylogeny of 25 conserved  
50 non-r-proteins, as in Figure 1D and Supplementary Figure S5; **(C)** ML phylogeny of 57  
51 conserved proteins, as in Figure 1E and Supplementary Figure S6; **(D)** Bayesian phylogeny  
52 of concatenated 16S and 23S genes, as in Figure 1F and Supplementary Figure S7. Colors  
53 as in Supplementary Figure S1.

54

55 **Supplementary Figure S8 (PDF):** Distribution of selected marker genes (Kozubal et al  
56 2012, Spang et al 2010) in different archaeal lineages (distribution of r-proteins is presented  
57 in Figure 2). Since, the distribution of repair genes might reflect similar environmental

58 adaptation rather than phylogenetic relatedness, these were omitted from this Figure.  
59 Additionally, the pattern of repair genes in NAG1 has been shown to be similar to  
60 Crenarchaeota (Kozubal et al 2012). Diamonds in blue fields indicate the presence of  
61 homologs in most of the members of a group. In case only some members of a group  
62 contain homologs, diamonds are shown in parentheses. Asterisks indicate presence in  
63 SAGs related to NAG1 only.  
64
