# Supplementary material
Source: PubMed Central journal article supplement (PMC4069404)
Supplement: ismej20146x10.pdf [file ismej20146x10.pdf]

2  
3 **‘Geoarchaeon NAG1’ is a deeply-rooting lineage of the**  
4 **archaeal order Thermoproteales rather than a new phylum**

5  
6 Lionel Guy, Anja Spang, Jimmy H. Saw and Thijs J. G. Ettema\*

7  
8 **Supplementary Methods**  
9

10 A set of 57 conserved proteins was used as the basis of this study. The set is fully described  
11 in Guy *et al.* (2014). Briefly, archaeal clusters of orthologous genes (arCOGs) (Wolf et al  
12 2012) were filtered, and only clusters present in 90% of a set of 58 representative archaea  
13 were retained. Homologs to these clusters were searched for in 10 representative bacteria,  
14 as well as in 8 novel archaeal genomes. Clusters that were not present in at least 3 bacterial  
15 genomes were discarded, leading to a set of 67 clusters. Paralogs and split proteins were  
16 curated manually. A discordance filter was then applied, following a method described  
17 elsewhere (Guy et al 2014, Viklund et al 2012), in an effort to remove horizontally transferred  
18 genes. Briefly, an individual gene tree is build for each cluster, and each tree is compared to  
19 all others, measuring the amount of shared, well-supported bipartitions. Trees are then  
20 ranked, with the ones having the least common bipartitions with other trees being the most  
21 discordant. Fifteen percent of the most phylogenetically discordant proteins were discarded,  
22 yielding to a set of 57 clusters. Of these, 32 are ribosomal protein genes. A 33rd cluster of  
23 ribosomal proteins (S14) was added to the set, as it was described to be universal  
24 previously (Lecompte et al 2002).

25 For each cluster, proteins were aligned with mafft-linsi v6.847b (Kato and Toh  
26 2008), and columns with 50% or more gaps were removed. Alignments were visually  
27 inspected for misaligned regions. Maximum likelihood phylogenies were inferred from  
28 individual alignments and concatenates with RAxML 7.9.5 (Stamatakis 2006) under CATLG  
29 model with 100 non-parametric bootstraps. Bayesian phylogenies were run with PhyloBayes

30 MPI 1.4f (Lartillot et al 2013) under CAT-Poisson model with a discrete gamma distribution  
31 of rates across sites. Four chains were run in parallel for ~12,000 generations, discarding  
32 the first 8000, and sampling every 50 trees. Convergence was assessed by plotting the  
33 variation of key statistics (log-likelihood, length of the tree, alpha parameter and number of  
34 modes) across generations, and verifying that the variation inside one chain was greater  
35 than across chains. In addition, the consensus trees for each chain were compared to  
36 ensure that they were similar and that the overall topology as shown in Figure 1 was  
37 identical in all four consensus trees. Trees were visualized with FigTree 1.4.0 (Andrew  
38 Rambaut, University of Edinburgh).

39         After alignment and concatenation, a  $\chi^2$ -test (Viklund et al 2012) was applied to find  
40 the most and least compositionally sites. Alignments were built by adding increasing  
41 amounts (20 to 100%, by 10% increment) of the most and least biased sites. For each of  
42 these alignments, 100 non-parametric bootstraps were inferred as mentioned above. In  
43 addition, ML phylogenies were inferred for the most and least biased half of the alignment.

44         Small and large ribosomal RNA subunits from 90 archaea and 10 bacteria (used as  
45 outgroup) were individually aligned with mafft-linsi v6.847b (Kato and Toh 2008) and  
46 columns consisting of 50% or more gaps were removed using trimAl (Capella-Gutiérrez et al  
47 2009). The alignments were then concatenated and maximum likelihood and Bayesian  
48 phylogenies were inferred as above. In the Bayesian analysis, four chains were run for  
49 ~80,000 generations, discarding the first 40,000, and sampling every 100 tree. Convergence  
50 was assessed as above.

51         The occurrence of discussed arCOGs in NAG1 and in SAGs affiliating with  
52 Geoarchaeota (AAA471-B05, AAA471-B23, AAA471-C03, AAA471-L13, AAA471-L14,  
53 AAA471-O08)(Rinke et al 2013) was determined with PSI-BLAST (Altschul et al 1997) using  
54 aligned arCOGs as queries(Wolf et al 2012) (using an inclusion threshold of E-value <  
55 0.001). The assignment of each specific protein to a particular arCOG cluster was  
56 subsequently checked by BLAST against the Refseq database

57 (<http://www.ncbi.nlm.nih.gov/refseq/>) to avoid incorrect annotations due to the presence of  
58 truncated sequences only.

59

60

## 61 **References**

62

63 Altschul SF, Madden TL, Schaffer AA, Zhang J, Zhang Z, Miller W *et al* (1997). Gapped  
64 BLAST and PSI-BLAST: a new generation of protein database search programs. *Nucleic*  
65 *Acids Res* **25**: 3389-3402.

66

67 Capella-Gutiérrez S, Silla-Martínez JM, Gabaldón T (2009). trimAl: a tool for automated  
68 alignment trimming in large-scale phylogenetic analyses. *Bioinformatics* **25**: 1972-1973.

69

70 Guy L, Saw JH, Ettema TJG (2014). The archaeal legacy of eukaryotes: a phylogenomic  
71 perspective. *Cold Spring Harbor Perspectives in Biology* **In press**.

72

73 Katoh K, Toh H (2008). Recent developments in the MAFFT multiple sequence alignment  
74 program. *Brief Bioinformatics* **9**: 286-298.

75

76 Kozubal MA, Romine M, Jennings Rd, Jay ZJ, Tringe SG, Rusch DB *et al* (2012).  
77 Geoarchaeota: a new candidate phylum in the Archaea from high-temperature acidic iron  
78 mats in Yellowstone National Park. *ISME J* **7**: 622–634.

79

80 Lartillot N, Rodrigue N, Stubbs D, Richer J (2013). PhyloBayes MPI. Phylogenetic  
81 reconstruction with infinite mixtures of profiles in a parallel environment. *Syst Biol* **62**: 611-  
82 615.

83

84 Lecompte O, Ripp R, Thierry J-C, Moras D, Poch O (2002). Comparative analysis of  
85 ribosomal proteins in complete genomes: an example of reductive evolution at the domain  
86 scale. *Nucleic Acids Res* **30**: 5382-5390.

87

88 Rinke C, Schwientek P, Sczyrba A, Ivanova NN, Anderson IJ, Cheng J-F *et al* (2013).  
89 Insights into the Phylogeny and Coding Potential of Microbial Dark Matter. *Nature* **499**: 431-  
90 437.

91

92 Spang A, Hatzepichler R, Brochier-Armanet C, Rattei T, Tischler P, Spieck E *et al* (2010).  
93 Distinct gene set in two different lineages of ammonia-oxidizing archaea supports the  
94 phylum Thaumarchaeota. *Trends Microbiol* **18**: 331-340.

95

96 Stamatakis A (2006). RAxML-VI-HPC: maximum likelihood-based phylogenetic analyses  
97 with thousands of taxa and mixed models. *Bioinformatics* **22**: 2688-2690.

98

99 Viklund J, Ettema TJG, Andersson SGE (2012). Independent genome reduction and  
100 phylogenetic reclassification of the oceanic SAR11 clade. *Mol Biol Evol* **29**: 599-615.

101

102 Wolf YI, Makarova KS, Yutin N, Koonin EV (2012). Updated clusters of orthologous genes  
103 for Archaea: a complex ancestor of the Archaea and the byways of horizontal gene transfer.  
104 *Biol Direct* **7**.

105

106

107
