# Supplementary material
Source: PubMed Central journal article supplement (PMC4069404)

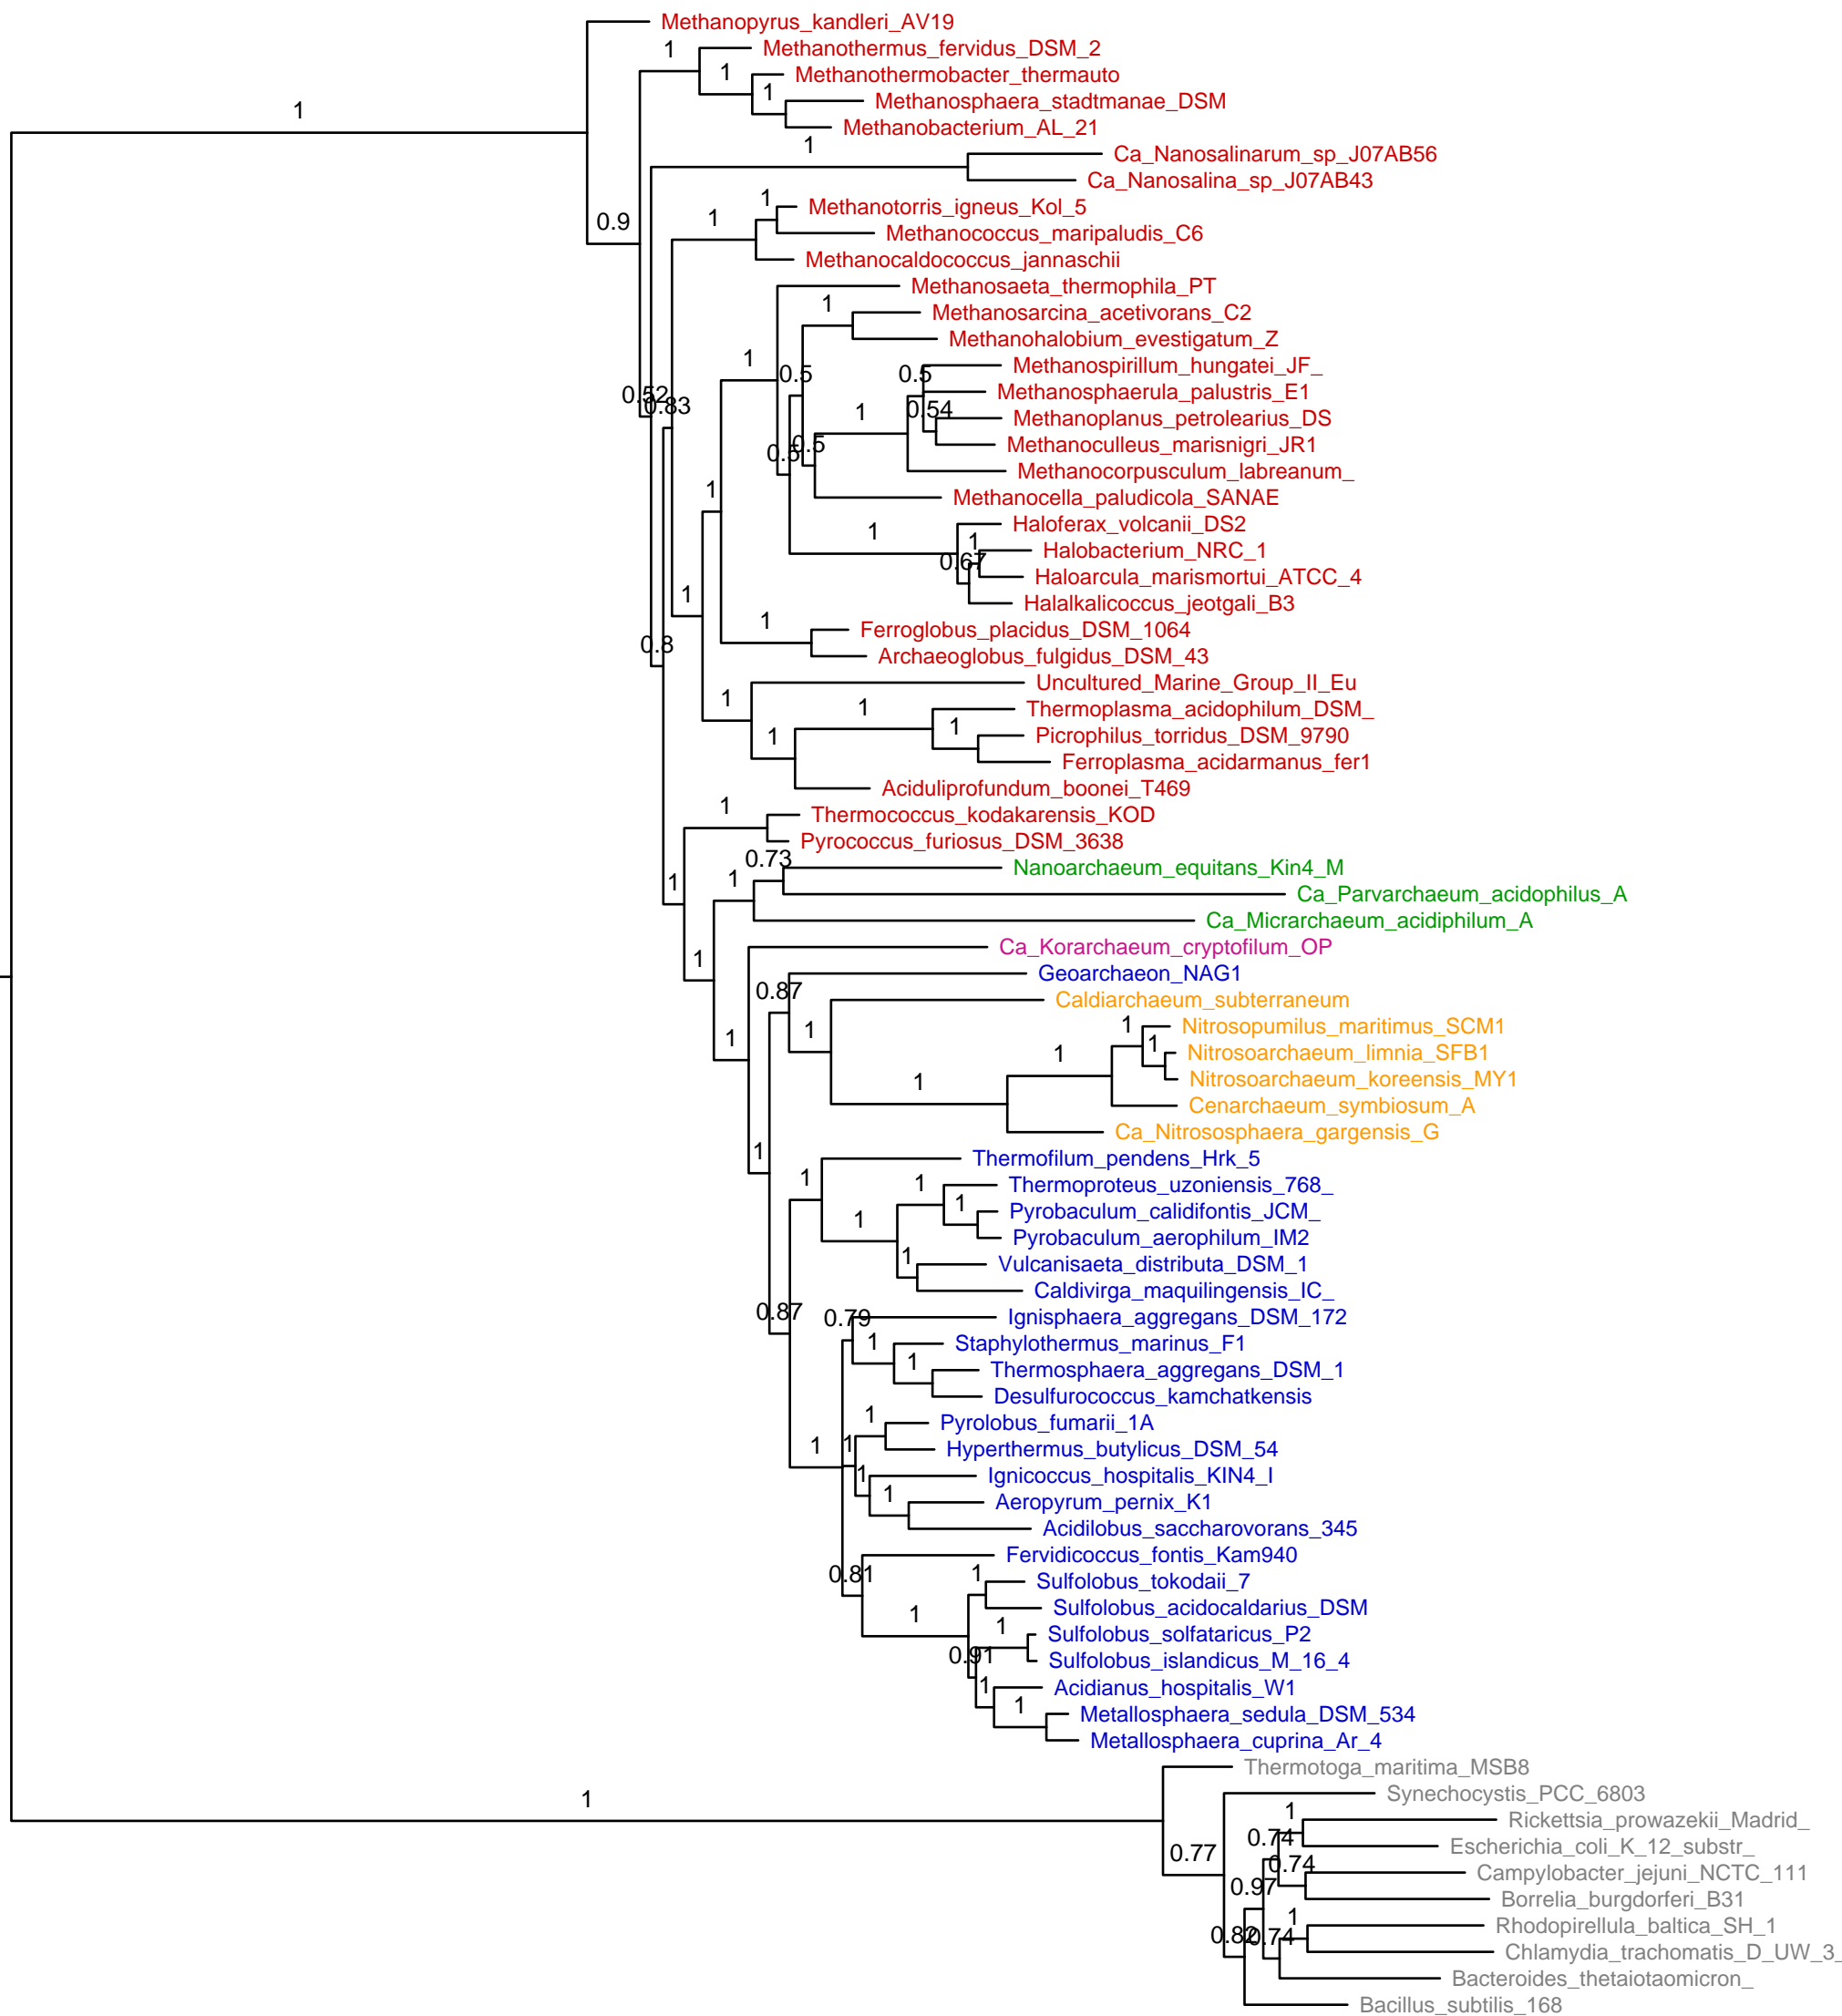

0.6

Supplement: ismej20146x4.pdf [file ismej20146x4.pdf]

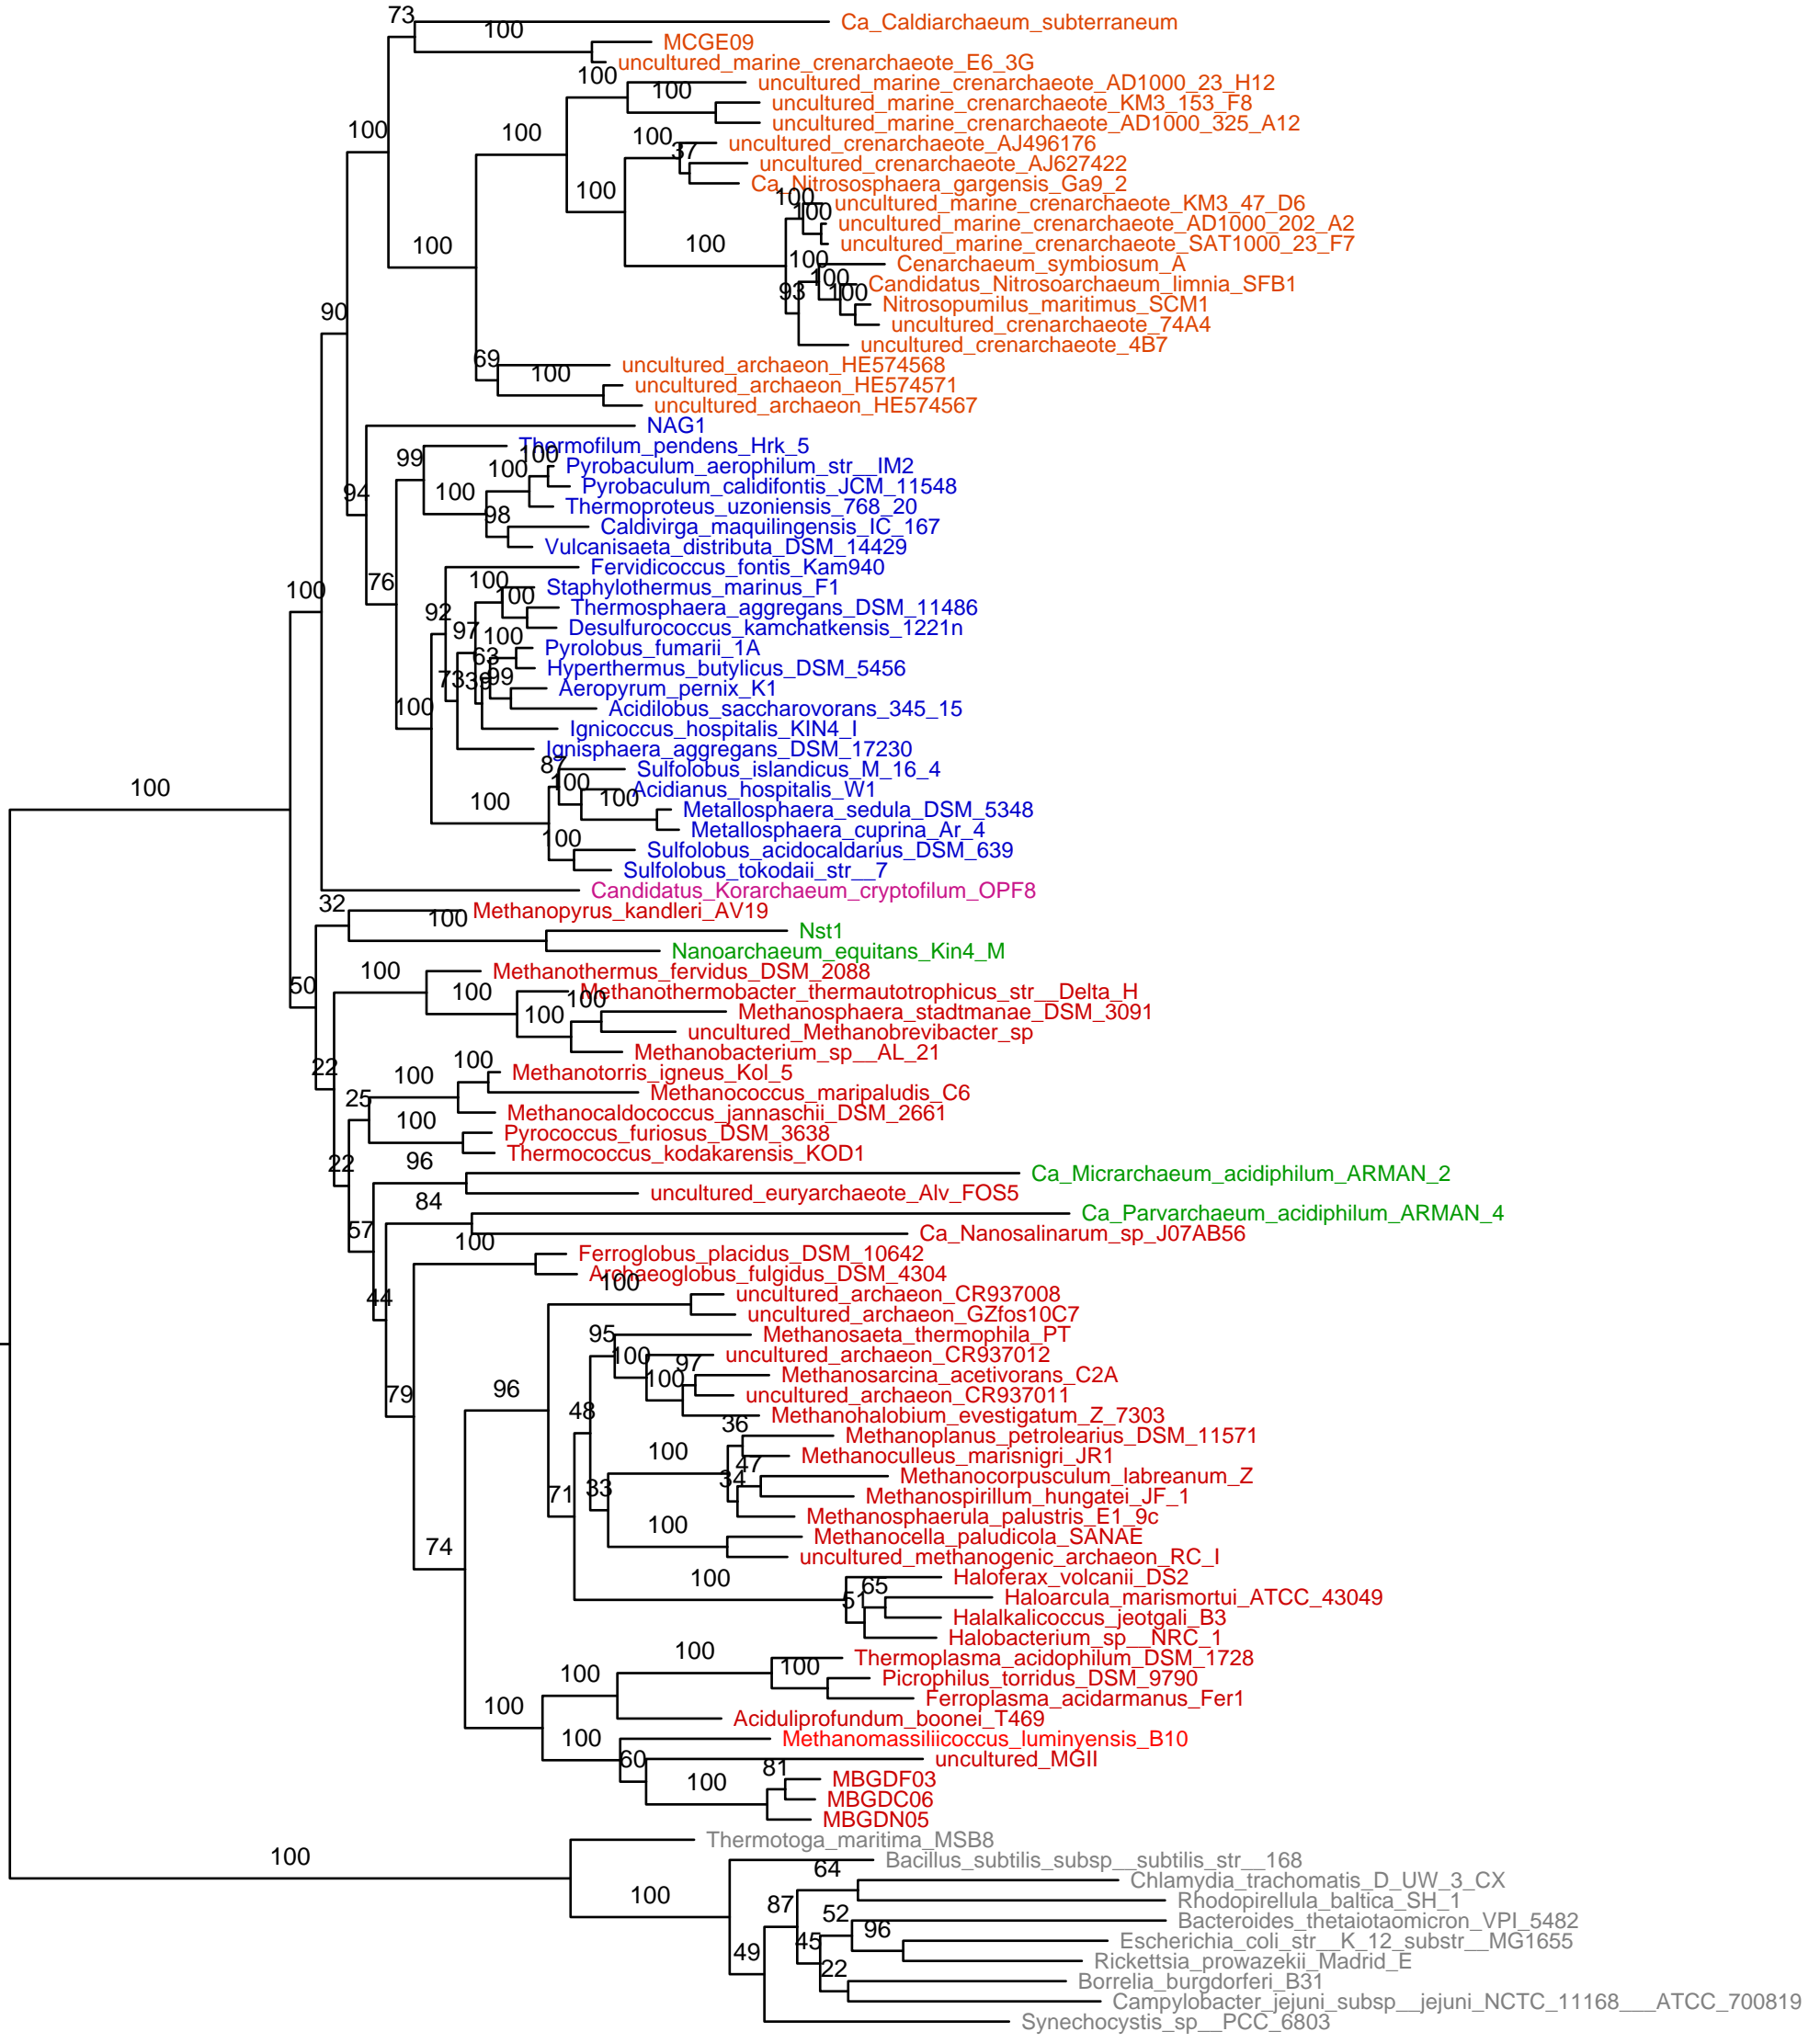

0.3

Supplement: ismej20146x6.pdf [file ismej20146x6.pdf]
